# Supplementary material for: In Vitro Transcriptional Response of Eimeria tenella to Toltrazuril Reveals That Oxidative Stress and Autophagy Contribute to Its Anticoccidial Effect
Source: MDPI journal article supplement (doi:10.3390/ijms24098370), 2023-05-06
Supplement: s1 [file s1]

**Supplementary Table S1:** Primers used for validation of the presence of differentially expressed gene (DEG) transcripts using Real time-PCR.

| Primers      | 5'-3'                      |
|--------------|----------------------------|
| EVM0004152-F | CGCACCTACGGACGCACAAC       |
| EVM0004152-R | CATAAGACCCCAGTCATTGCTCAC   |
| EVM0006509-F | TCCAGCACCAGAGGAAGGAGAAC    |
| EVM0006509-R | CGGCAGTGAGGGACTTGAAAGC     |
| EVM0004969-F | CCTTGCTATGGTGACGGACTTCG    |
| EVM0004969-R | CCGCTCGTTGTTCCCTGTGTG      |
| EVM0003960-F | TAGGAGCTTCTGAGGTAGCTTTCCC  |
| EVM0003960-R | TCCAACCAACACCTGAACCAAACCTC |
| EVM0007006-F | GGACAAGAGCAGCAGACAGGAAC    |
| EVM0007006-R | CCGCCTCGAATTTGCCCTCAG      |
| EVM0001682-F | GCAGCAGCAGGAAGCAGATGAG     |
| EVM0001682-R | TTGGCAGCACTGAGGTTGTTGG     |
| GAPDH-F      | CATTGGGCGGTTGGTCTTCC       |
| GAPDH-R      | CCAGGATATCTGCCGTGGAC       |
