# Supplementary material for: In Vitro Transcriptional Response of Eimeria tenella to Toltrazuril Reveals That Oxidative Stress and Autophagy Contribute to Its Anticoccidial Effect
Source: MDPI journal article supplement (doi:10.3390/ijms24098370), 2023-05-06
Supplement: s1 [file s1]

**Supplementary Figure S1.** Heatmap showing differentially expressed genes between 2 h of toltrazuril treatment and no treatment (T2 vs. T0).

**Supplementary Figure S2.** Heatmap showing differentially expressed genes between 4 h of toltrazuril treatment and no treatment (T4 vs. T0).

**Supplementary Figure S3.** qPCR validation of differentially expressed genes. Statistical analysis was performed using unpaired two-tailed Student's *t*-tests with glyceraldehyde-3-phosphate dehydrogenase (GAPDH) as the reference.
