# Supplementary material for: In Vitro Transcriptional Response of Eimeria tenella to Toltrazuril Reveals That Oxidative Stress and Autophagy Contribute to Its Anticoccidial Effect
Source: Int J Mol Sci. 2023 May 6;24(9):8370. doi: 10.3390/ijms24098370 (PMC10179680; doi:10.3390/ijms24098370)
Supplement: Supplementary file 1 [file ijms-24-08370-s001.zip]

Archive with 6 entries (6 files):
- supplementary datasets .xlsx
- Supplementary Figure S1.tif
- Supplementary Figure S2.tif
- Supplementary figure S3.tif
- Supplementary Figures.pdf
- supplementary Table S1.pdf
