# Supplementary material for: In Vitro Transcriptional Response of Eimeria tenella to Toltrazuril Reveals That Oxidative Stress and Autophagy Contribute to Its Anticoccidial Effect
Source: Int J Mol Sci. 2023 May 6;24(9):8370. doi: 10.3390/ijms24098370 (PMC10179680; doi:10.3390/ijms24098370)
Supplement: Supplementary file 1 [file ijms-24-08370-s001.zip › supplementary datasets .xlsx]

## Sheet: gene expression profile
Supplementary Dataset 1: Eimeria tenella gene expression under toltrazuril treatment for at different times. Gene transcription levels are expressed in transcripts per million (TPM).
	T0_1	T0_2	T0_3	T1_1	T1_2	T1_3	T2_1	T2_2	T2_3	T4_1	T4_2	T4_3
EVM0000001	0.28364	0.157133	0.23544	0.100691	0.35462	0.265731	0.0605708	0.0407361	0.0850986	0.0542086	0.0497244	0
EVM0000002	200.828	189.429	179.802	166.685	153.146	138.846	144.432	143.052	117.657	231.635	248.174	269.604
EVM0000003	8.88681	9.16046	8.71834	8.98585	9.44808	7.52472	8.53993	8.51834	7.86394	10.0474	9.45261	9.98998
EVM0000004	47.1581	41.3992	45.0382	48.2202	35.1087	37.8911	69.8937	66.5662	60.1404	28.0225	28.8787	28.8602
EVM0000005	5.25472	4.21064	5.69563	3.09792	4.31937	3.85705	5.13979	6.67083	7.51672	4.35782	4.14538	2.89922
EVM0000006	66.6636	65.5992	62.124	64.5315	60.6622	62.474	79.7272	78.4811	70.1135	55.5374	56.4254	51.6475
EVM0000007	100.251	97.8791	94.0359	104.057	117.09	104.715	49.6066	58.2149	58.3145	243.471	240.564	212.882
EVM0000008	192.479	186.491	186.732	174.294	157.635	168.127	263.061	251.269	217.953	141.981	141.7	150.375
EVM0000009	0.0292578	0	0	0.0311594	0.0598574	0	0	0.151272	0	0	0	0
EVM0000010	0	0	0	0	0	0	0	0	0	0	0	0
EVM0000011	1.47794	1.17177	0.972888	1.63851	0.954189	1.04698	0.640278	1.0961	0.665126	2.37545	2.50388	1.85366
EVM0000012	4.12191	3.94732	3.45915	4.44782	3.58489	3.73195	2.80936	2.91038	2.35348	4.49757	5.24286	4.62187
EVM0000013	70.8477	72.7118	73.6348	75.8349	80.5559	83.2347	84.2071	80.853	91.6491	64.8442	65.1205	63.9219
EVM0000014	45.4296	49.6044	56.8687	43.6134	60.3795	55.5185	65.4063	53.4594	65.6583	39.3509	39.9494	44.3207
EVM0000015	72.8733	69.4941	76.5916	80.9602	86.9684	82.2815	76.0404	81.8052	88.9695	57.2617	57.5465	55.0623
EVM0000016	0.112729	0.112411	0.0350897	0.280129	0.345941	0.0792084	0	0.04857	0.0338212	0	0	0.221143
EVM0000017	0.899285	1.40117	1.02348	0.628512	1.00615	0.177716	0.486103	0.326923	0.101178	0.531721	0.310378	0.248084
EVM0000018	655.889	621.146	666.986	672.886	660.389	688.451	781.025	787.456	773.333	591.726	625.638	627.424
EVM0000019	3.22314	2.87375	3.00986	2.2615	2.75401	2.83758	0.655907	1.27435	2.04781	11.8055	9.87165	11.6602
EVM0000020	13.8173	15.866	14.3888	14.2991	15.6475	17.4756	15.0215	16.0919	19.7226	11.5232	11.4068	11.7458
EVM0000021	38.1289	37.0547	31.9245	24.2265	22.3442	23.3628	28.3188	22.888	15.8797	54.6903	56.7939	53.4365
EVM0000022	59.1873	52.4459	59.5476	61.9621	65.7443	66.8375	59.0535	47.4247	63.9635	57.8284	61.6208	58.647
EVM0000023	0	0	0	0	0	0	0.0167945	0	0	0	0	0
EVM0000024	53.8106	57.3428	55.1808	51.4988	50.1178	48.5806	64.9073	63.7538	48.3637	49.4394	58.4113	52.8472
EVM0000025	0.341274	0	0	0.121152	0	0.239795	0	0	0	0	0	0
EVM0000026	0.423451	0.422257	2.10896	1.50324	0	0.148768	0.813845	0.729789	0.635226	0	0	0.623021
EVM0000027	0.445512	0.78189	0.232977	0.208765	0.255208	0.225387	0.136999	0.552823	0.609508	0.551741	0.1687	0.603041
EVM0000028	0	0	0	0	0	0	0	0	0	0	0	0
EVM0000029	146.856	145.157	134.689	127.798	130.243	129.263	125.656	137.866	117.021	123.889	119.669	127.16
EVM0000030	0	0	0.0881229	0	0	0	0	0	0	0	0	0
EVM0000031	0.218535	0	0	0.116369	0	0	0	0	0	0	0	0
EVM0000032	1.82396	2.48283	0.13518	0.215834	1.45117	1.34263	0.250396	0.261956	0.990229	0.796781	2.23829	0.638949
EVM0000033	7.57484	5.78982	5.75564	4.54729	5.73831	7.36229	4.58382	4.61842	5.75662	3.13438	4.28446	3.54847
EVM0000034	7.87566	7.80707	8.10548	8.26012	6.54699	7.48816	10.0271	10.0854	10.4445	18.1536	15.4355	16.4669
EVM0000035	108.838	111.17	98.4793	110.042	113.815	100.46	73.3048	77.3226	73.7527	136.266	134.966	148.456
EVM0000036	0	0	0	0	0	0	0	0	0	0	0	0
EVM0000037	4.7951	3.92335	4.42039	5.3359	5.94267	4.79472	7.5322	6.1583	7.27622	14.4866	11.4939	13.4317
EVM0000038	607.332	578.182	582.653	639.677	637.234	609.019	621.503	608.472	626.295	473.289	457.214	435.841
EVM0000039	5.49856	7.73638	6.64699	6.81855	9.47715	7.9785	5.53728	6.3771	6.88128	10.4296	10.7552	12.4675
EVM0000040	22.9573	23.4192	22.2858	25.9434	25.8473	27.5361	15.3366	16.5756	16.0284	44.4842	41.7158	38.8762
EVM0000041	16.8924	17.1041	18.5122	16.4418	13.9181	14.9509	25.3322	23.8516	21.1201	19.1537	19.5277	19.1838
EVM0000042	208.427	185.009	214.623	200.517	160.653	169.164	289.226	295.335	242.342	172.061	176.513	181.25
EVM0000043	158.468	153.577	155.061	152.621	137.826	143.172	175.015	166.869	156.964	128.556	120.446	116.969
EVM0000044	24.9789	22.5425	26.3418	25.2688	21.7088	24.4515	38.1909	26.1534	36.8979	24.8269	23.917	24.7272
EVM0000045	35.4252	32.2731	32.2376	31.0477	32.0286	26.4956	22.8075	21.6625	19.9169	39.9606	48.2135	52.3423
EVM0000046	93.44	99.3066	104.539	103.717	108.358	116.966	102.416	106.475	114.214	167.957	173.36	160.803
EVM0000047	83.7501	88.095	77.3832	71.8816	85.4899	91.2498	75.5572	84.9583	93.3516	79.6255	78.0567	61.8706
EVM0000048	205.898	198.91	201.416	208.869	220.634	228.361	221.691	200.508	247.519	150.988	144.484	151.547
EVM0000049	1.21179	1.56378	0.732215	0.531403	1.09375	2.10361	1.30149	1.28992	1.21902	0.245218	0.6748	0
EVM0000050	0.111148	0.0791676	0.133448	0.135282	0.0487271	0.066941	0.0762925	0.205239	0.0714579	0.109246	0.0501047	0.116808
EVM0000051	610.837	598.888	629.846	584.008	572.534	583.54	651.076	673.759	637.762	411.281	401.642	416.496
EVM0000052	0.432518	0.316285	0.323117	0.706297	0.176974	0.516642	0.415635	0.149083	0.181672	0.396777	0.181977	0.0848482
EVM0000053	1.17085	0.778364	0.364456	0.554197	1.1977	1.09692	1.37518	0.336313	0.585469	0.895079	0.205259	0.957034
EVM0000054	420.133	412.173	414.547	437.477	433.855	420.335	418.562	406.32	402.562	601.89	543.124	557.618
EVM0000055	0	0	0	0	0	0	0	0	0	0	0	0
EVM0000056	12.6542	13.5199	13.8215	19.3727	14.3313	12.0273	18.1319	15.6263	16.3727	7.57924	5.70443	5.31946
EVM0000057	1.1353	1.15744	1.29752	1.20908	1.16133	1.16978	1.50621	1.56602	1.61666	1.70504	1.65757	1.13435
EVM0000058	2.52174	1.90765	3.73531	3.70432	3.64697	3.20773	2.25618	1.34877	2.42627	3.73926	3.42994	6.26899
EVM0000059	32.7933	31.1504	31.6793	38.1612	32.3163	42.0866	46.3191	40.5607	46.6281	21.0309	20.1832	19.757
EVM0000060	29.0302	32.4582	28.5265	29.2834	32.8009	31.2266	25.6163	23.7706	26.6233	53.4885	50.7961	50.2424
EVM0000061	84.1035	86.4337	77.501	84.3546	77.2017	80.7148	75.5814	73.9959	81.3788	65.3849	61.7285	68.0353
EVM0000062	0.39702	0.395901	0.803288	0.352353	0.0676874	0.55793	0.254349	0.0855297	0	0.113816	0.208803	0.292067
EVM0000063	57.2211	52.3451	62.548	55.7112	53.4488	51.5569	39.7262	35.0225	38.4091	133.56	147.76	151.79
EVM0000064	7.34615	8.70559	7.25771	7.71021	6.64334	7.18156	9.92409	9.90828	10.1576	11.3539	8.063	9.86849
EVM0000065	9.49966	11.104	7.87232	6.83405	8.62347	13.7919	8.40339	8.29444	10.9286	10.0637	10.3231	10.552
EVM0000066	4.13213	4.55651	3.79745	4.14456	3.62304	4.30906	2.85732	3.16509	3.10918	7.89723	9.45164	8.55645
EVM0000067	7.57356	7.02223	7.50666	8.84407	9.03843	7.91229	7.53331	4.20772	6.15898	21.2545	17.924	21.7972
EVM0000068	4.2515	3.88292	4.1928	3.13139	4.22706	2.80584	1.1073	1.18125	1.93121	1.16185	0.752289	0.70152
EVM0000069	7.76768	9.50017	9.28408	8.2195	10.4416	9.62137	7.56019	6.39319	9.06799	5.90962	7.54194	6.64224
EVM0000070	23.364	23.2004	23.3045	23.1219	22.6972	24.6121	26.8883	25.9736	27.1132	12.3006	11.766	12.9538
EVM0000071	4.75439	4.86741	5.62372	4.05072	5.70641	6.08	3.65505	2.21235	4.33635	1.09038	0.800145	2.79805
EVM0000072	0.255664	0.152966	0.244051	0.26623	0.215033	0.311379	0.169249	0.279059	0.29148	0.57657	0.519912	0.685441
EVM0000073	23.2217	25.8092	24.4179	23.881	21.2272	18.2261	37.8009	42.592	27.1955	18.6966	17.2699	15.2657
EVM0000074	23.7613	20.9139	24.2267	33.5687	25.4223	25.5548	21.6689	22.0948	27.6065	58.5955	57.7652	66.8876
EVM0000075	46.153	44.5896	54.8803	39.118	57.6664	55.04	32.995	23.945	28.1731	52.7408	57.9528	47.6977
EVM0000077	89.107	86.6611	84.6403	89.171	82.9769	89.7307	109.565	111.083	103.474	75.3673	71.1861	69.9439
EVM0000078	7.14665	8.63543	7.72928	9.76633	8.0938	7.01355	6.83266	6.59827	6.25199	4.45296	3.76819	4.18448
EVM0000079	8.49451	8.59699	8.76117	8.23646	9.07837	7.21583	9.0158	8.03	8.55858	7.85073	11.6021	7.46146
EVM0000080	1.66087	1.2045	0.563987	1.12561	1.39005	0.318274	1.88623	1.75647	2.4462	1.29854	0.714675	0.888592
EVM0000081	8.39023	8.7366	9.05745	7.50849	9.68973	8.41938	5.57656	5.99539	5.46439	22.0376	24.0364	22.6265
EVM0000082	0	0	0	0	0	0	0	0	0	0	0	0
EVM0000083	0	0	0	0	0	0	0.0362736	0	0.033975	0	0	0
EVM0000084	12.124	11.6307	10.6052	9.75208	12.1404	14.8811	9.29111	7.40578	9.7153	8.00723	4.84276	4.59121
EVM0000085	0.778532	0.388168	0.727014	0.414566	0.132731	0.136758	0.748144	0	0.467156	0	0	1.33636
EVM0000086	7.10229	6.95692	7.3513	7.14554	7.47411	7.20407	5.2396	6.45866	5.19042	15.3515	16.2881	15.0502
EVM0000087	21.1143	25.3944	22.2829	23.0561	22.1455	22.9147	15.7359	19.4499	19.6683	54.6829	54.2327	53.0146
EVM0000088	6.16267	6.50678	5.34508	6.29905	5.91364	5.90205	6.55467	6.57232	6.33679	9.5664	8.71484	7.90214
EVM0000089	11.2601	10.5266	10.515	12.7415	11.0864	8.60418	11.7674	12.0075	10.0082	6.29463	4.21941	6.62678
EVM0000090	118.863	112.621	118.442	109.195	100.635	91.7849	138.377	134.676	111.47	103.225	94.9485	95.6273
EVM0000091	6.6572	6.7753	5.25533	5.55495	6.31842	6.58248	7.84829	7.80653	5.06536	4.84002	4.33136	6.46248
EVM0000092	12.3552	11.9742	11.308	12.696	10.2263	10.6128	9.24535	9.59326	9.88352	17.942	20.8405	19.5405
EVM0000093	0.0601038	0.139847	0.0187089	0.0213367	0.020494	0.0422318	0.0192526	0	0.0360651	0	0.0948302	0.0294768
EVM0000094	0.460796	0.599343	0.31805	0.320051	0.266422	0.35897	0.0962629	0.181273	0.198358	0.827057	0.568981	0.471629
EVM0000095	30.2206	31.1795	31.9633	32.8769	35.678	36.8748	39.6581	38.3623	49.8841	14.0976	13.1593	17.371
EVM0000096	0.138406	0.138015	0.129247	0	0	0	0	0.1789	0	0.238066	0	0
EVM0000097	0	0	0	0	0	0.272806	0.0621834	0	0.116486	0	0	0
EVM0000098	16.0063	12.7003	17.3981	16.1759	14.4807	14.6934	21.5011	25.2499	20.6807	18.7246	19.5517	17.5359
EVM0000099	2.20436	2.31184	1.81005	2.3881	2.99358	1.96281	1.20525	2.50541	1.16308	2.22268	0.959441	0.838774
EVM0000100	17.3189	17.5425	16.7851	13.4988	18.1631	17.102	20.528	16.9484	22.2268	10.1491	9.99918	7.39519
EVM0000101	67.5328	66.2474	65.8198	72.0682	71.5386	64.3058	58.8292	61.4764	57.0779	61.1495	58.0402	53.8204
EVM0000102	0.750566	0.426041	0.582285	0.799348	0.377983	0.620689	1.02087	1.2239	0.862641	0.695164	0.400814	0.407743
EVM0000103	26.1469	27.5129	24.1225	26.2526	26.8001	26.1746	30.3735	28.9105	27.0074	38.1106	35.9521	33.2168
EVM0000104	0.241874	1.28636	0.978764	1.03038	0.329894	0.679808	0.387388	1.87584	0.870815	1.24811	1.39928	1.18623
EVM0000105	4.47943	6.79199	6.33183	6.07757	6.68492	9.50706	6.10308	6.70212	5.27449	5.59397	4.84078	4.1981
EVM0000106	0.232289	0.347451	0.412144	0.420557	0.237616	0.244826	0.446445	0.240201	0.146354	0.539394	0.494775	0.20506
EVM0000107	18.8031	20.063	17.7125	22.2161	21.3807	19.948	15.341	15.8483	16.9241	35.3148	32.0689	33.6579
EVM0000108	0	0	0	0	0	0	0	0	0	0	0	0
EVM0000109	125.583	127.26	136.598	130.668	129.177	135.223	149.477	156.71	150.409	121.7	120.936	118.481
EVM0000110	9.71943	9.84056	10.6759	10.0735	9.71374	9.10577	7.30027	6.16121	7.23987	16.0454	16.7158	19.2312
EVM0000111	0.104348	0.15608	0.146164	0.11113	0.160111	0.329938	0.150412	0.134877	0.0939203	0.628195	0.0823185	0.230289
EVM0000112	15.473	22.5071	11.9305	14.3622	11.6168	9.72503	8.45765	13.0276	7.15507	14.8944	22.3972	17.544
EVM0000113	26.5467	26.2229	27.3961	28.707	21.7707	23.2205	35.3222	41.7335	32.9204	44.7252	45.8583	47.9044
EVM0000114	237.641	221.133	232.795	228.829	212.08	212.653	285.544	270.85	254.096	142.424	135.031	146.618
EVM0000115	2.08054	1.43449	1.67642	1.65866	1.34992	1.65402	1.86224	0.968132	1.4018	4.70338	5.08338	4.51293
EVM0000116	91.9629	110.566	99.6638	113.335	98.6337	108.596	102.56	103.762	99.2446	114.536	103.606	111.773
EVM0000117	0.202545	0	0	0	0.207189	0.213476	0.194639	0	0	0	0	0
EVM0000118	1.10725	2.42907	0	1.41505	0.679581	1.86721	1.48964	0.572479	0.797279	2.28543	2.09638	1.30327
EVM0000119	1.74217	2.14788	2.36638	2.56382	2.65698	2.06989	2.58735	3.80773	4.10551	1.41659	1.64925	2.84287
EVM0000120	14.6812	14.0969	14.4285	16.0153	16.9767	15.4142	9.00253	8.15361	7.53645	87.2215	98.1641	100.019
EVM0000121	30.6694	29.849	27.3886	29.7482	24.712	27.7097	36.3099	35.7149	32.2762	52.3962	54.077	53.2044
EVM0000122	45.8868	45.3328	42.3334	46.1252	50.3369	45.4907	43.7274	40.2111	37.7749	47.54	47.1685	45.959
EVM0000123	14.3532	14.9261	8.32925	12.9931	10.2776	13.507	8.27576	9.01124	8.95093	18.1636	23.1313	24.4363
EVM0000124	78.6517	84.7999	93.1697	85.4643	83.7633	84.3273	96.1844	95.5737	91.311	62.767	65.7008	65.4375
EVM0000125	1.2079	0.602249	0.112797	0.450243	0.803141	0.318274	0.580378	0.936783	0.761039	0.31165	0.19058	0.710873
EVM0000126	75.0404	73.4871	68.3078	68.7673	64.0584	69.5771	105.891	106.307	90.5643	46.9382	42.2814	46.398
EVM0000127	0.201317	0.401499	0.375991	0	0	0.212183	0.0967297	0.130109	0	0	0	0
EVM0000128	0.781244	0.519361	0.810608	0.508457	0.843557	0.320215	0.333667	0.243104	0.44274	1.36867	1.59785	1.46873
EVM0000129	147.58	131.548	141.802	150.854	140.042	151.794	194.261	176.651	181.737	97.9472	88.7217	99.1414
EVM0000130	18.2134	20.8023	18.6565	25.3786	25.0329	25.2851	21.5889	28.9351	26.3593	17.3892	16.4571	18.8879
EVM0000131	0.415217	0.207023	0.387741	0	0	0.65644	0.199505	0.536699	0.747449	1.4284	0.327559	0.305453
EVM0000132	239.376	231.436	239.521	258.147	258.329	263.36	265.53	266.83	273.63	196.539	197.339	191.975
EVM0000133	17.6241	18.0083	16.8642	17.0702	18.1024	14.1416	19.724	19.3118	20.7588	24.8254	21.3986	23.6893
EVM0000134	29.4652	27.7865	31.8437	31.3803	28.6169	31.8697	44.8588	37.3728	44.549	15.2805	17.8471	16.8862
EVM0000135	196.173	183.524	175.788	165.905	152.298	153.827	160.556	164.827	134.077	242.043	246.725	249.437
EVM0000137	153.711	165.699	163.475	156.367	172.547	167.835	134.262	137.631	148.979	162.489	152.083	163.991
EVM0000138	0	0	0.11158	0	0	0	0.459292	0.154446	0.107547	0	0	0.1758
EVM0000139	42.9872	58.616	52.0029	52.891	58.464	53.2017	28.1654	31.1496	32.536	99.9877	82.4678	105.172
EVM0000140	0	0	0.0447393	0.0510235	0.196033	0.100991	0	0.123854	0.0862441	0.0824075	0	0
EVM0000141	35.961	35.7572	35.5817	37.4076	34.3843	37.4998	30.3558	29.7365	30.9016	31.243	27.5242	28.6457
EVM0000142	56.0003	58.5119	52.9801	57.6167	55.0319	55.4731	42.9022	40.8524	38.2792	67.2114	82.6335	77.8827
EVM0000143	16.5226	15.7037	14.6257	15.3053	12.324	15.0562	12.2391	15.3501	12.6253	23.2392	15.8858	18.3589
EVM0000144	1002.28	969.562	979.343	967.541	916.052	900.778	1244.76	1228.02	1133.2	579.397	601.612	611.645
EVM0000145	109.88	108.262	108.751	121.589	118.474	118.93	119.978	118.61	120.717	158.908	163.333	164.388
EVM0000146	0.0261829	0.0609212	0.0163002	0.111538	0.035711	0.0367947	0.0503218	0	0.0471329	0	0	0.0256818
EVM0000147	438.677	449.024	481.722	485.386	518.337	484.413	438.345	396.159	420.346	356.815	370.671	362.689
EVM0000148	539.939	548.729	590.683	542.325	586.62	598.805	588.126	593.001	560.023	689.403	712.225	672.228
EVM0000149	59.3017	56.8871	54.246	59.5168	69.4621	75.0436	68.2121	69.2592	84.5461	87.8297	93.3353	85.1823
EVM0000150	0	0	0	0	0	0	0	0	0	0	0	0
EVM0000151	3.15926	3.96044	3.67511	4.36435	3.08397	3.55809	4.73607	4.17692	5.97959	2.11154	1.5381	2.36394
EVM0000152	86.1212	80.8716	88.7268	89.2714	74.9512	83.0556	103.695	119.843	101.758	61.332	58.2725	58.4091
EVM0000153	37.4705	37.6869	35.1418	31.9934	39.9818	36.7691	36.1631	40.5003	45.1377	24.586	29.4325	32.4365
EVM0000154	0.0653885	0.16301	0.366369	0.0696383	0.100332	0.103376	0.0628362	0.0422597	0.323698	0.0562361	0.257921	0.0481029
EVM0000155	2.32289	4.13081	3.75991	3.62833	4.23748	4.03963	3.72037	4.45372	4.56484	2.86345	1.28275	1.53795
EVM0000156	7.75072	6.40392	6.10046	8.4903	7.02234	5.95172	2.12805	3.86423	3.18912	5.52313	2.44578	5.8647
EVM0000157	0.0338492	0.101261	0	0.144197	0.0346254	0.321085	0.16264	0.17501	0.213267	0.349336	0	0.0498022
EVM0000158	29.4544	32.6061	30.4134	27.2231	28.5371	34.1896	24.4394	28.009	28.8469	37.7186	28.6614	29.0181
EVM0000159	132.804	127.338	126.18	125.351	99.2451	102.96	180.597	174.375	126.551	241.91	262.584	261.536
EVM0000160	10.1851	10.8757	10.313	11.4872	9.43472	10.2279	10.3982	10.5897	10.9451	13.1761	12.4113	11.6243
EVM0000161	257.697	269.751	274.949	305.175	286.462	282.007	261.733	267.98	284.75	205.713	210.323	204.902
EVM0000162	7.14698	7.62654	7.8551	8.34849	7.94553	7.63331	7.21199	9.20716	9.79416	11.4313	9.60087	10.8313
EVM0000163	5.04773	5.0335	4.25755	2.6012	4.49723	3.7756	4.06834	5.05128	7.03482	1.96054	2.05527	5.031
EVM0000164	38.9582	37.7682	35.6384	36.1069	31.8738	35.0482	48.5751	39.0623	39.5173	90.9826	101.401	103.854
EVM0000165	83.6017	72.6495	74.2899	85.3192	66.816	68.255	65.7193	77.3929	65.3233	96.7468	87.6427	94.4595
EVM0000166	8.08516	8.15951	6.04921	7.4176	7.12464	6.16014	6.45905	5.79194	4.38387	7.37237	6.53197	8.16931
EVM0000167	14.0518	15.0582	11.4894	11.474	11.0655	12.3226	7.18218	9.12388	7.82855	11.5399	10.6198	13.1184
EVM0000168	0.650934	0.826126	0.66312	0.504175	0.181598	0.810805	0.909856	0.229467	0.159787	2.44286	0.93366	0.17413
EVM0000169	0.0535418	0.00533909	0.0799981	0.0285108	0.0273848	0.0507884	0.0205808	0.0415241	0.067468	0	0.0506861	0.0157552
EVM0000170	16.3845	16.2007	16.6102	16.2922	15.0254	15.4086	17.6896	16.4669	16.3616	28.0241	25.7784	23.0068
EVM0000171	43.5978	42.0312	43.2127	46.6932	40.5457	43.2444	44.7049	43.4302	34.4958	146.552	157.099	148.788
EVM0000172	21.0605	19.5498	17.6682	19.0862	18.1572	15.7004	25.6683	25.0091	19.5981	32.1512	35.8402	38.6698
EVM0000173	7.71779	10.7744	9.34038	10.5866	13.6421	11.9737	8.54385	10.295	10.5032	10.089	9.25446	13.172
EVM0000174	6.04825	6.22266	5.37906	6.69695	6.03963	5.59049	7.28827	5.83233	5.91911	7.30711	6.74052	6.10907
EVM0000175	9.73398	10.5247	10.2043	9.37365	9.91904	10.7703	7.99214	7.23097	8.35845	9.17338	6.88463	7.35283
EVM0000176	2.07608	4.01107	3.5139	1.93464	2.92008	2.32489	2.99257	1.00631	4.08761	6.02605	2.45669	5.15453
EVM0000177	8.86039	8.83541	9.80631	9.43626	9.28736	7.03277	9.04014	8.76628	11.5194	9.59581	10.9594	9.81742
EVM0000178	108.691	109.946	104.259	106.213	109.849	113.002	109.737	110.404	124.392	70.6912	64.2954	67.8745
EVM0000179	0	0	0	0	0	0	0	0	0	0	0	0
EVM0000180	114.331	112.772	114.199	113.762	100.703	97.1858	134.67	122.394	118.879	108.641	105.526	104.386
EVM0000181	68.6164	66.8307	67.1293	69.199	64.1692	65.7258	77.0247	72.103	70.2257	51.3773	50.7299	48.2525
EVM0000182	17.5879	19.2921	18.4683	17.7745	18.4314	17.0975	12.5502	13.616	15.022	34.3716	33.093	31.7681
EVM0000183	3.35495	4.67044	4.09454	5.34182	4.75707	4.02616	2.2983	3.09138	2.93	11.1415	9.06684	12.267
EVM0000184	1.14051	1.77702	2.13008	1.82195	2.69791	2.10361	0.684996	1.38206	1.60397	0.980873	1.0122	1.25852
EVM0000185	340.582	330.128	330.18	323.419	307.304	295.242	278.339	280.97	275.336	401.624	400.527	441.898
EVM0000186	234.844	228.866	236.422	206.157	195.718	195.841	275.536	268.586	195.466	219.025	220.607	230.075
EVM0000187	1.27759	2.29318	1.90888	1.0885	1.30689	4.30894	0.613861	0.495414	0.229984	0.65926	0.604725	1.3158
EVM0000188	2.45342	1.61901	2.56061	3.49664	2.65731	2.89005	3.18977	4.52366	2.89021	1.55148	2.96013	2.65419
EVM0000189	190.038	179.239	189.636	187.646	168.638	165.406	229.358	231.478	173.068	186.642	205.443	202.057
EVM0000190	12.0362	12.6728	10.8002	18.261	15.1324	12.3315	5.81553	8.95222	6.5364	9.25277	9.44219	9.10177
EVM0000191	32.5926	29.8788	24.0667	24.5638	21.8094	22.0871	33.8721	37.6194	29.6871	17.8214	18.3187	16.393
EVM0000192	0.864191	0.700176	0.428722	0.632746	0.828757	0.341562	0.570941	0.209443	0.121536	2.18324	1.10784	2.26482
EVM0000193	27.7169	28.4638	23.9083	21.0985	26.5187	23.4477	22.6596	28.8748	28.9188	44.3541	46.4143	43.4172
EVM0000194	41.6167	41.2568	43.6541	44.6534	39.3675	42.3246	51.6941	48.438	49.6977	34.8306	30.3183	32.0076
EVM0000195	0.334403	0.111153	0	0.118712	0.342071	0.469935	0.428467	0.576321	0.300986	0.766924	0.703483	2.13202
EVM0000196	7.48327	6.84812	7.91317	7.85558	8.90102	6.84306	8.45189	7.99424	9.33809	6.53946	5.93514	6.28305
EVM0000197	64.9632	59.1568	60.7413	61.5358	59.4212	56.2461	74.9466	70.2563	64.1213	80.7123	87.3978	84.8608
EVM0000198	30.2616	29.1938	29.3106	32.6781	29.8037	28.1861	57.3492	46.7565	53.9684	31.231	29.7579	25.8859
EVM0000199	0.795943	0.476219	0.743273	0.226046	0.542796	0.615194	0.91785	0.754465	1.00297	0.273814	0.0837212	0.234213
EVM0000200	6835.61	6938.89	6788	7302.59	6963.74	6244.33	5980.78	5763.13	5400.36	6089.18	6890.47	6414.13
EVM0000201	112.076	112.659	102.616	107.5	119.124	111.951	79.6164	87.1199	95.8357	177.276	159.768	175.979
EVM0000202	132.727	139.696	135.918	132.171	129.152	125.883	148.677	133.584	134.389	142.014	139.697	137.041
EVM0000203	0.106808	0.106507	0	0.0284375	0	0.0281432	0	0	0	0	0	0.275006
EVM0000204	86.8948	86.5867	94.0925	97.4645	95.558	101.427	101.938	96.1148	103.883	60.0035	60.3342	60.3144
EVM0000205	24.3877	23.9573	23.3579	22.5364	23.3478	22.0395	21.4768	18.7036	17.2904	49.1334	49.3904	47.2349
EVM0000206	12.4887	9.75737	13.105	11.1065	10.7995	13.8412	8.16578	11.15	13.3266	6.42225	11.5788	8.90314
EVM0000207	113.788	112.199	105.425	112.535	89.7094	96.2312	131.409	148.722	107.643	84.4309	82.0869	84.6708
EVM0000208	79.2554	85.5405	78.0924	69.6974	64.0833	67.9319	109.147	97.472	82.403	60.6442	75.0283	70.5651
EVM0000209	26.9719	27.1295	26.9899	28.1425	27.8986	27.6513	30.1121	27.8675	32.9246	13.5514	14.4904	12.8229
EVM0000210	8.25431	6.88414	9.53002	7.27238	7.67599	7.35529	13.3404	10.9603	10.0635	6.4536	7.10369	9.38441
EVM0000211	8.75012	9.83043	9.09883	9.35952	8.75534	9.30292	5.94843	8.34682	6.3281	8.47836	10.2488	9.66957
EVM0000212	0.974747	1.21184	0.848183	1.00102	0.92264	0.920617	2.07716	1.82445	2.23323	0.626012	0.489341	0.749664
EVM0000213	0	0	0	0.376343	0	0	0.226389	0.30451	0	0.202609	1.1151	2.4263
EVM0000214	10.7872	11.5491	10.7726	9.81228	13.0665	13.2375	6.06407	5.84592	6.44993	19.7111	22.5163	19.2658
EVM0000215	86.9416	81.7482	82.8144	89.2545	94.4269	86.1897	83.6038	82.2959	90.1902	97.4338	105.719	104.178
EVM0000216	33.6169	31.5301	34.3237	29.1155	29.6003	31.2805	19.69	18.9597	16.7983	68.2292	75.1022	68.7742
EVM0000217	0	0	0.242338	0.276377	1.32731	0	0	0	0	0	0	0
EVM0000218	49.556	56.6873	54.0631	59.0323	53.075	52.8354	43.3396	41.976	41.4439	130.298	133.207	123.274
EVM0000219	42.5415	47.6516	41.7672	43.91	36.6616	44.3769	36.2609	36.5332	33.8319	21.5512	26.4346	18.8631
EVM0000220	0.0878146	0.227674	0.180408	0.0748176	0.161691	0.129576	0.365677	0.302685	0.347773	0.151046	0.147788	0.111974
EVM0000221	18.3244	19.9666	19.5633	20.1184	22.2724	25.2811	18.2028	21.224	17.7442	43.1175	41.0938	45.3636
EVM0000222	31.4207	29.6601	33.1071	29.6786	33.0397	30.4655	23.25	22.9129	20.8064	54.5949	49.7008	51.9271
EVM0000223	559.913	561.698	585.419	584.936	573.102	524.882	486.402	465.562	418.187	755.324	831.007	808.281
EVM0000224	0.0851727	0	0	0	0	0	0	0	0.0766615	0.146502	0.134383	0
EVM0000225	1.19689	0.633594	0.869312	0.97568	0.997606	0.934434	0.681583	0.611187	0.305896	2.05872	3.07742	1.39139
EVM0000226	3337.81	3231.16	3272.37	3389.59	3183.86	3018.27	3133.36	3025.49	2426.93	2725.1	2949.08	3050.74
EVM0000227	16.2235	16.9939	15.4647	16.15	17.1865	16.5918	19.6614	24.2059	28.1648	19.1281	18.837	24.5071
EVM0000228	5.63471	5.93449	5.55746	2.62962	6.73537	7.5403	4.13713	6.87411	7.63595	4.57377	4.29531	4.75063
EVM0000229	39.1203	35.4782	37.9598	36.0906	37.4648	42.5891	37.5933	33.2944	40.0652	22.9836	25.2734	21.1992
EVM0000230	1.50078	1.26376	2.36693	1.66936	1.80812	1.12482	1.73065	2.41407	2.04123	0.86048	0.42096	0.686963
EVM0000231	67.7858	66.5432	66.8084	66.9973	62.632	66.1997	60.4532	66.704	66.262	46.8763	40.7109	44.7998
EVM0000232	2.36142	2.35477	2.35217	1.42511	0.644153	1.90813	0.832059	1.32267	2.0546	0.541572	1.98709	0.810682
EVM0000233	165.113	165.925	156.856	155.75	135.698	137.922	189.078	190.89	158.469	135.084	131.87	145.147
EVM0000234	157.525	160.275	158.715	157.972	149.953	152.711	161.58	158.045	147.016	199.091	199.156	197.934
EVM0000235	18.0663	17.4416	17.4797	20.2208	20.7563	17.1412	14.3017	11.4033	14.1204	35.4955	41.1529	38.2064
EVM0000236	79.0982	77.9524	81.2778	80.4006	81.5597	86.1906	59.5824	57.5417	53.9654	187.074	189.581	182.878
EVM0000237	1.02538	1.8935	1.52496	0.849354	1.55392	2.64177	1.05835	1.42356	1.09383	3.85406	3.89476	4.02304
EVM0000238	239.062	209.515	218.782	231.902	208.385	209.828	272.315	250.396	230.32	210.341	204.304	213.871
EVM0000239	2.20584	2.07023	1.45403	1.38189	2.25642	0.82055	4.36417	3.18665	1.86862	1.11593	1.22835	0.572725
EVM0000240	2.63011	2.71984	4.13894	3.37164	3.43776	3.38808	1.73177	0.818426	1.22748	6.28327	6.99305	4.94458
EVM0000241	3.59107	2.83491	2.37535	3.98381	2.90812	2.20785	1.29409	1.74064	2.02013	1.02947	1.88863	0.440293
EVM0000242	3.30624	2.49844	2.41207	3.10849	1.92883	2.12348	2.82968	3.40549	2.13889	4.22077	3.99388	3.38231
EVM0000243	64.9475	59.7698	56.228	60.9708	50.1532	58.0325	80.8309	76.8602	71.436	60.0827	61.9641	61.8959
EVM0000244	12.4216	7.93299	8.60198	15.1613	12.5637	8.82608	7.37665	8.11813	10.0497	29.0481	26.2047	24.0256
EVM0000245	10.5961	10.2033	10.2726	9.69114	9.47387	10.7417	14.8463	14.585	17.7641	11.1304	8.742	11.6628
EVM0000246	226.394	260.327	207.046	190.62	216.08	185.418	114.357	128.391	110.448	236.864	252.125	240.804
EVM0000247	119.606	117.648	115.321	97.9747	118.517	119.556	58.0008	58.8313	64.8637	203.136	178.75	188.281
EVM0000248	56.1436	55.2184	53.5057	53.5324	49.1142	61.0265	52.1044	54.8888	63.834	35.6233	32.1564	36.4523
EVM0000249	35.3966	34.9883	33.473	35.0563	31.5251	34.8022	49.6565	47.0336	49.4842	25.7991	22.2853	23.7436
EVM0000250	35.6136	27.5207	30.2477	34.0563	33.4719	32.2232	26.9183	19.7591	20.6013	40.0804	36.2434	36.3505
EVM0000251	173.778	166.036	174.323	160.245	142.283	146.506	184.307	180.331	159.887	100.734	97.5477	96.5123
EVM0000252	17.0241	20.055	18.9925	19.0658	19.5008	22.1525	18.5645	17.6113	18.9178	40.7324	36.2904	35.8834
EVM0000253	0.450042	0	0.240149	0.753172	0.460361	0.745377	0.679604	1.57893	0.405069	0	0	0
EVM0000254	793.83	804.453	777.301	769.829	761.159	720.103	654.555	670.304	577.791	1411.8	1382.41	1463.51
EVM0000255	0	0	0	0.0203078	0	0	0	0	0	0	0	0
EVM0000256	23.7876	23.2847	22.4788	24.9845	23.3941	25.0023	26.0826	25.5497	28.6981	20.9373	19.8777	22.6839
EVM0000257	0	0	0	0	0	0	0	0	0	0	0	0
EVM0000258	65.5989	66.1668	64.4808	59.6974	60.3873	60.4862	75.9544	75.3818	63.7395	96.3936	102.607	99.3517
EVM0000259	174.25	180.169	174.139	192.354	222.992	205.897	154.491	147.047	166.687	233.595	230.302	241.241
EVM0000260	9.22704	8.16591	10.0166	9.82674	8.9667	10.576	7.31518	5.2179	8.30499	33.9244	32.9379	43.4423
EVM0000261	6.97265	7.6095	7.04221	5.89604	4.46932	5.29883	6.70049	8.08433	6.24894	6.38274	5.66589	3.21414
EVM0000262	51.1599	51.6593	50.547	55.3556	52.0689	56.1885	58.549	53.1137	64.0947	22.7951	26.1368	24.8161
EVM0000263	13.682	13.536	11.1669	11.4734	16.1446	14.6475	15.4773	12.6023	13.9147	17.3261	18.8674	14.6618
EVM0000264	1.79135	2.44789	2.78802	2.89699	2.57897	2.86701	3.57037	2.40121	2.80667	0.570598	1.36083	1.17138
EVM0000265	0.629912	0.753763	0.764698	0.536682	0.128871	0	0.544792	1.62842	0.396876	0.325046	0.397543	0.834108
EVM0000266	9.20477	9.51426	7.8627	9.22765	8.18542	8.44455	6.78839	5.99504	6.75273	11.9052	12.191	9.8535
EVM0000267	14.2754	15.9114	16.2593	15.1498	17.1948	20.0964	14.0558	17.7711	13.7296	5.86894	6.84807	9.89263
EVM0000268	163.716	161.7	172.184	174.58	195.018	205.353	175.879	163.244	200.856	148.697	143.775	136.847
EVM0000269	111.422	104.608	113.581	111.263	108.191	108.976	114.009	122.507	126.008	77.3187	77.8493	79.5698
EVM0000270	56.7848	57.6761	57.5001	56.1443	60.9836	59.7225	64.2083	69.5826	73.6152	92.6989	93.2058	86.96
EVM0000271	69.3291	68.8405	73.3261	68.0109	65.3048	70.158	80.6559	99.1647	84.2953	45.5828	47.3479	50.1799
EVM0000272	1.15265	1.41063	2.10383	0.948575	1.28627	1.10442	1.4601	0.6095	1.41473	1.53203	0.413324	0.462516
EVM0000273	6.70779	6.25365	6.6286	7.60859	8.57701	6.14977	4.21637	4.27577	3.51498	15.4891	16.455	17.0344
EVM0000274	16.8041	14.4186	23.5382	11.0291	16.19	21.418	16.8992	11.8705	17.2353	28.5679	42.8525	42.5479
EVM0000275	0	0	0	0	0	0	0	0	0	0	0	0
EVM0000276	2.24442	2.79761	3.03905	3.10737	3.15684	2.54297	3.88226	5.65709	6.21191	4.24658	3.01	4.87074
EVM0000277	0.185263	0.097232	0.10016	0.0519221	0.0299228	0.0822156	0.449765	0.390708	0.394934	0.134174	0.0615375	0.143461
EVM0000278	0.610613	0.852448	0.912332	1.82084	1.87385	1.54456	0.821491	0.315705	1.09919	8.19227	4.62437	3.05453
EVM0000279	158.447	159.325	145.015	153.002	130.649	124.986	116.99	136.536	115.406	277.68	262.047	261.957
EVM0000280	4.25044	4.04462	3.41252	4.36108	3.79116	4.02912	3.41208	3.75201	3.69739	3.72237	3.84382	3.56534
EVM0000281	33.5635	33.2825	36.3659	35.6786	40.2395	40.0814	45.4462	43.1686	48.8288	50.7649	43.944	48.4957
EVM0000282	28.1338	26.2837	26.142	24.7337	30.5242	25.909	17.4661	19.6227	22.6899	51.2665	42.1913	48.8725
EVM0000283	21.5019	21.6613	19.4214	20.0076	22.672	21.2046	20.3365	16.6932	19.842	11.9828	11.7011	11.9102
EVM0000284	0.123945	0	0	0.660005	0	0	0.714645	0	0	0	0	0.18236
EVM0000285	287.117	294.136	285.854	295.933	311.171	312.539	288.808	294.932	327.477	256.948	245.632	236.81
EVM0000286	26.4777	26.01	23.3491	26.2929	22.3355	22.681	25.7775	28.1009	21.1357	79.4939	82.4821	83.8279
EVM0000287	146.746	146.986	140.403	129.752	130.104	119.196	71.7168	74.2904	62.1563	331.726	390.313	375.708
EVM0000288	2.20096	2.12004	2.9824	2.89261	2.17479	2.69486	5.13913	4.76976	4.47626	6.94329	6.3246	6.31117
EVM0000289	5.12844	6.95598	6.30977	6.57481	6.36486	5.02096	3.92392	3.92706	3.30336	10.5771	9.97058	9.44074
EVM0000290	4.80251	5.98621	4.01756	3.62287	4.09386	6.01077	4.61505	5.04367	3.87233	0.344192	0.31572	0.441619
EVM0000291	0	0.138015	0.129247	0	0	0	0	0	0	0	0	0
EVM0000292	12.647	10.2562	8.18169	12.901	12.5473	10.3585	10.5426	8.0751	9.87456	14.284	11.1791	9.5279
EVM0000293	16.1791	21.1306	20.7241	25.1598	22.7015	21.1268	18.0242	14.0652	15.4645	8.37336	6.77709	15.1673
EVM0000294	1.08909	1.08602	2.16118	1.01489	1.11407	1.72181	2.48564	2.46354	1.10279	0.234163	1.71834	0
EVM0000295	1.30125	0.955492	0.927927	1.14645	0.980165	1.09718	0.852585	1.14679	0.894384	0.590078	0.317294	0.417714
EVM0000296	43.7323	44.6825	42.3643	50.1368	45.502	44.9985	51.8898	54.0923	52.6502	66.1625	63.2371	62.7594
EVM0000297	33.9898	33.5089	35.8886	32.5996	33.3864	33.3817	33.2199	43.56	50.2355	29.5645	27.1189	30.4033
EVM0000298	0.870746	1.54363	1.53591	2.06075	1.97936	1.4276	2.4173	2.37606	4.96364	0.499245	0	0.854083
EVM0000299	0	0	0	0	0	0	0	0	0	0	0	0
EVM0000300	29.6582	29.3952	29.2007	28.1069	26.5257	25.5485	30.0493	29.091	23.5017	45.2466	41.6627	42.9584
EVM0000301	110.206	97.5762	113.075	113.535	97.5852	100.891	149.619	141.498	118.855	80.0746	84.4231	78.7257
EVM0000302	0	0	0	0	0	0	0	0	0	0	0	0
EVM0000303	27.1778	23.0598	27.6057	24.501	21.9482	22.9911	24.857	31.7397	31.9722	18.0429	12.7889	19.4672
EVM0000304	0.430773	0.859116	0.402267	0.611693	1.02818	0.756703	0.689931	0.464005	0.64621	2.22286	1.4726	2.42954
EVM0000305	95.5822	90.9261	93.6447	102.113	93.6414	102.066	120.781	111.943	121.046	112.11	116.434	115.137
EVM0000306	11.9703	13.5161	13.8089	14.6274	12.1217	13.4405	14.2776	13.2177	12.2449	28.2115	28.0449	28.4828
EVM0000307	26.4924	21.0833	27.4035	23.765	20.7418	21.586	41.3697	34.5068	42.0039	16.168	16.1971	19.0768
EVM0000308	173.886	164.691	183.343	166.15	156.733	147.531	191.011	193.442	162.176	132.999	138.395	145.919
EVM0000309	0.422254	0.781976	0.584428	0.562123	0.485929	0.500674	0.753578	0.555542	0.475074	0.570667	0.737603	0.876422
EVM0000310	0.140751	0.421064	0	0	0.287958	0.296696	0.270515	0.181932	0.633431	0.726303	1.33244	0
EVM0000311	0.691388	0.321738	0.774764	0.638147	1.03729	0.534382	1.01875	0.714936	0.414865	0.0792819	0.218171	0.0678157
EVM0000312	0	0	0	0	0	0	0	0	0	0	0	0
EVM0000313	30.9476	33.9276	31.1801	29.583	23.9471	25.5647	37.0278	32.5661	31.6592	19.5479	22.5247	25.3575
EVM0000314	0.54784	0.0273148	0.358111	0.350067	0.196141	0.115481	0.921298	0.566499	0.862915	0.141348	0.129655	0
EVM0000315	177.476	188.805	190.99	169.638	171.028	168.382	252.782	241.668	252.282	130.324	130.525	105.658
EVM0000316	66.0725	61.7587	62.4251	61.8809	59.1723	60.6406	75.1779	66.2096	69.1099	59.7167	57.4708	71.025
EVM0000317	3.31028	2.49128	3.38286	2.97666	2.47575	3.1598	3.57121	3.35037	3.51355	6.36534	6.20833	6.38666
EVM0000318	100.461	94.3437	99.1672	96.1803	88.5698	91.8971	127.408	118.128	111.548	87.1249	84.334	88.3923
EVM0000319	0.376756	0.563541	0.263869	0.601865	0.0963489	0	0.995639	0.243493	0.254331	0	0.445827	0.6929
EVM0000320	0.157677	0.262055	0.196325	0.615726	0.322586	0.276979	0.20203	0	0.283841	0.361619	0	0.30932
EVM0000321	0	0.0248676	0.0232877	0.0265588	0.0255098	0	0.0239646	0.0322342	0.0897837	0	0	0
EVM0000322	6.41653	6.31834	5.91692	7.41105	6.75883	6.74167	7.10209	6.21714	7.30277	9.58597	9.14156	8.43598
EVM0000323	0.212932	2.12331	0.994208	0.680313	0.871258	0.448848	1.0231	1.10092	0.574961	1.83128	1.67979	2.81957
EVM0000324	4.40382	4.14046	4.1124	3.75203	3.86126	2.51967	3.0228	2.2769	6.22874	5.41059	2.97781	4.99833
EVM0000325	41.9439	38.5508	39.4313	41.2223	34.411	38.2243	59.9191	52.2751	46.2827	49.7921	49.1524	65.1634
EVM0000326	0	0	0	0	0	0	0	0	0	0	0	0
EVM0000327	12.2276	14.3884	13.7592	12.8599	11.0811	12.2673	16.4212	16.0587	15.1255	12.2595	16.9196	13.084
EVM0000328	60.985	52.7909	50.164	65.225	60.2597	57.165	74.8144	97.6121	85.7231	49.1011	45.8583	53.0725
EVM0000329	0	0	0	0	0	0	0	0	0	0	0	0
EVM0000330	5.06232	4.90893	4.83901	4.43618	4.8624	5.11498	4.88388	5.60313	6.09022	2.74252	2.59427	2.33122
EVM0000331	11.8261	10.8678	8.71571	11.4217	8.56889	10.5397	19.4143	16.8971	14.1141	18.8957	23.4608	20.0437
EVM0000332	141.847	145.304	141.425	123.192	176.147	165.588	104.39	96.6727	122.389	316.267	312.005	308.375
EVM0000333	61.7466	62.8698	57.676	59.094	56.6178	57.7408	55.1459	58.9681	54.3392	101.648	99.6296	97.1913
EVM0000334	150.318	135.781	127.698	145.153	123.686	126.418	132.651	135.908	124.827	174.298	189.653	188.549
EVM0000335	8.5983	8.50077	8.16658	8.84407	8.04371	6.89359	5.15535	4.93953	4.63022	10.9974	13.1024	11.8938
EVM0000336	8.50688	6.81662	11.2067	9.22156	11.8098	15.6905	13.868	10.4067	11.3485	8.62264	11.2648	7.15208
EVM0000337	26.6763	29.5504	23.1051	25.2601	26.7061	26.4974	16.7256	18.4536	18.3279	63.4951	55.9094	53.6426
EVM0000338	7.77903	12.3044	11.8358	12.9269	11.5931	13.0051	15.5952	14.4757	15.6331	8.18973	6.77161	7.30128
EVM0000339	34.7047	30.9484	28.6581	33.9507	32.8126	34.3308	25.3461	27.2995	28.2469	34.4521	34.6528	38.5145
EVM0000340	1.00913	0.125786	1.17795	0	1.03228	0.13295	0.363655	0.652191	0.113537	2.82063	0.59707	0
EVM0000341	18.6017	20.0067	19.4181	17.6881	14.9508	18.6254	12.7683	14.4265	15.3676	11.1986	12.7879	10.752
EVM0000342	5.70605	3.55623	5.61392	4.88323	6.5665	5.04747	9.59582	12.512	8.43746	2.62895	1.92918	2.69848
EVM0000343	0.459756	0.171922	0.321999	0.367228	0.764235	0.363427	0.607489	0.742836	0.362086	1.87817	0.181348	0.0845546
EVM0000344	8.47971	8.1472	7.57179	8.50349	10.6369	12.1339	3.92566	4.64028	3.7326	11.924	10.547	10.5638
EVM0000345	110.99	107.503	112.545	108.971	105.447	107.004	115.068	126.858	119.204	97.5928	96.6855	97.3793
EVM0000346	148.887	148.622	147.603	151.906	142.629	137.713	179.33	191.121	166.118	106.087	102.267	104.472
EVM0000347	14.6918	14.1266	14.891	15.2501	11.865	12.3283	18.2695	19.3146	14.2045	14.0581	16.4205	16.1428
EVM0000348	5.39033	6.47773	6.00165	5.74067	5.7967	4.95289	3.78534	4.55561	4.41627	15.0962	18.0998	12.0995
EVM0000349	61.5195	64.1159	68.4324	59.2729	59.5978	60.9726	56.9763	58.8633	63.2734	32.9721	33.6532	36.6796
EVM0000350	0.188023	0.843717	0.702323	0	0.769337	0.396341	0	0	0.253851	1.29364	0.148329	0.691592
EVM0000351	29.2831	26.8579	25.4169	27.0971	23.3654	26.4306	43.3176	44.3644	40.5441	24.1144	23.1757	25.2167
EVM0000352	0.944569	0.529822	1.21284	1.00596	0.84545	1.86665	0.340388	0.228924	0.584498	1.82781	0.279434	0.347435
EVM0000353	9.96521	8.78392	9.60449	9.0144	11.0495	9.10263	10.6166	11.8948	11.1841	11.3002	8.8902	10.752
EVM0000354	2.56457	3.30324	2.55168	2.12973	2.59215	2.26858	3.28596	4.16336	2.28082	3.20339	2.38444	2.7401
EVM0000355	9.09503	11.5206	9.68683	8.71753	12.7987	12.8762	14.5273	14.2025	15.421	18.35	14.7377	13.3453
EVM0000356	7.17193	7.15171	6.84516	7.26199	8.14601	7.63601	5.31233	5.79194	4.92089	4.96378	4.97583	4.40713
EVM0000357	0.087261	0.029005	0.0543245	0	0.029754	0	0.139758	0	0	0.150094	0	0
EVM0000358	0.784101	0.568647	0.39939	0.303659	0.61979	0.450774	0.342498	0.552823	0.577429	0.490436	0.562333	0.839013
EVM0000359	11.3241	15.4477	13.5357	10.6129	12.0471	14.6565	10.1856	10.1875	14.881	20.8806	19.6536	17.5941
EVM0000360	1717.37	1707.12	1808.82	1736.95	1668.65	1581.02	1476.6	1495.87	1521.22	1693.92	1624.88	1689.72
EVM0000361	3.25106	2.39618	2.07895	2.86021	2.67495	2.86785	2.92041	3.15168	2.03561	2.00583	1.56113	0.623905
EVM0000362	0.925274	0.664319	0.967732	0.788329	0.605755	0.750914	1.14701	0.89699	1.15761	0.891256	0.890523	1.03463
EVM0000363	13.0761	13.1693	11.0841	10.6268	11.5413	10.7917	3.72897	4.34136	1.93711	0.897422	0.56594	1.10347
EVM0000364	14.6227	15.3611	14.5966	15.0046	13.8218	13.6616	17.3939	15.4232	15.1949	22.6107	23.1564	21.6491
EVM0000365	15.8391	14.4328	14.791	13.59	16.6848	13.0045	9.90069	9.81942	10.0554	19.6004	18.6449	20.8567
EVM0000366	14.77	15.5098	16.5511	16.4362	17.082	19.443	18.0749	17.8835	22.7083	14.7247	14.0773	12.9942
EVM0000367	27.9303	32.4847	32.9143	36.0588	31.4661	30.1132	38.9516	47.906	34.0318	25.904	32.1029	26.4792
EVM0000368	5.06169	3.78557	9.01036	7.74909	4.36874	6.33517	20.0645	20.0368	9.11176	2.44868	1.74698	1.86181
EVM0000369	2.26222	1.82751	2.2997	1.82981	2.72418	2.92757	1.48597	1.48055	2.11348	1.03436	0.76807	1.39034
EVM0000370	37.299	33.0932	35.3051	35.4113	30.7875	32.3759	52.043	48.9502	46.1421	26.5216	26.8428	28.155
EVM0000371	1.93768	2.52844	2.46086	2.62964	1.59702	1.93723	1.46836	1.83193	2.08289	2.85679	2.32349	2.55766
EVM0000372	64.062	58.4968	64.789	67.2672	71.6406	77.4362	58.967	56.5781	69.811	75.5713	76.9361	72.9477
EVM0000373	3.13211	3.0972	2.83936	2.97356	2.58187	2.9221	1.84738	2.12989	2.10698	3.48664	4.11641	3.02086
EVM0000374	16.2375	19.2451	15.9429	14.3284	19.1725	19.3631	18.5462	20.9882	17.2039	29.5255	28.8398	25.1188
EVM0000375	24.3357	27.1966	26.3193	27.2836	26.8491	28.0153	33.8028	33.1139	34.0855	38.9904	36.3722	33.6533
EVM0000376	63.4475	59.049	62.7597	66.6587	58.2575	61.4167	87.974	82.9712	81.8561	83.6736	77.8141	76.4861
EVM0000377	5.32965	5.69777	3.83111	6.30965	5.95901	5.13395	4.8834	5.35097	5.37717	14.9022	15.1557	15.92
EVM0000378	14.8834	15.0287	17.5047	14.5085	17.9954	19.248	17.8073	17.9554	19.6718	21.2184	19.1247	19.3728
EVM0000379	199.501	190.221	194.157	187.336	165.345	177.429	224.561	215.515	183.263	174.856	189.016	200.294
EVM0000380	36.7052	43.5577	44.6678	32.5462	44.1728	44.4629	50.1156	47.2295	44.548	80.5615	61.5811	61.5794
EVM0000381	7.98898	7.96646	8.09839	8.00444	9.40876	8.42016	5.00025	3.80445	5.58222	12.2047	9.78531	14.0741
EVM0000382	1049.75	991.061	1087.85	1078.45	983.099	958.84	1212.43	1206.82	939.319	1102.86	1155.37	1195.42
EVM0000383	260.447	268.235	256.686	256.228	266.51	271.896	281.55	268.137	299.75	200.549	187.266	192.165
EVM0000384	497.739	492.347	462.447	503.479	505.476	502.27	509.813	511.971	501.613	379.56	386.028	396.14
EVM0000385	16.0491	16.8916	13.277	15.494	18.2644	15.6286	5.5727	5.88478	6.45576	34.3428	24.1581	24.3988
EVM0000386	6.91099	7.00266	8.95187	7.00403	6.84142	8.57631	6.96259	8.06849	10.0329	7.28578	8.61766	7.05208
EVM0000387	3.37667	3.54437	3.32421	3.47568	2.93626	2.90048	2.47893	2.13705	2.10856	7.23461	7.22245	6.79842
EVM0000388	179.939	185.352	183.608	170.258	198.091	184.883	133.999	106.518	150.126	299.781	307.543	299.89
EVM0000389	96.6796	97.0369	101.281	108.345	123.108	110.709	80.8374	80.925	85.1457	318.146	330.285	359.929
EVM0000390	8.98411	9.04792	8.91135	8.13995	10.0817	9.86942	8.57974	8.99834	9.78607	15.8953	12.9408	13.1854
EVM0000391	29.3618	44.5839	13.5017	19.5833	10.9218	24.2258	12.8253	26.4516	7.00734	30.0983	7.01913	7.63633
EVM0000392	17.3583	18.7455	17.5545	17.8944	19.1261	17.2831	17.142	17.5706	16.5333	28.0754	28.3043	28.4388
EVM0000393	2.19821	1.46134	1.82466	0.650299	2.99815	0.900996	2.58183	0.63141	0.879352	0.630175	0.963409	1.97646
EVM0000394	6.83887	7.09794	10.2311	8.62111	10.1366	9.85579	7.44371	6.2239	10.8663	11.2831	8.91842	13.2449
EVM0000395	12.1437	13.1125	13.0125	14.7619	15.8351	14.0144	14.7581	14.2697	15.9868	5.14813	6.61892	5.41424
EVM0000396	5.08923	5.79987	6.42715	5.93619	4.31349	6.43669	6.66052	6.89146	7.06732	2.83456	2.37066	1.28362
EVM0000397	55.9024	54.2636	57.7513	55.2215	58.5655	56.0731	64.1011	72.9561	81.0648	37.3938	35.1527	35.3631
EVM0000398	44.7664	42.5014	42.9853	47.5002	56.0879	50.8342	19.607	22.0366	19.404	308.855	317.667	346.396
EVM0000399	2.1954	2.32247	2.2284	2.09411	2.34338	2.33401	2.64172	3.42994	2.74924	0.985101	0.421685	0.589841
EVM0000400	115.077	108.104	106.705	107.119	88.9634	91.4116	166.003	165.56	134.09	98.4705	102.813	100.96
EVM0000401	0.636348	0.888375	0.594239	1.1521	0.520752	0.402415	0.550358	0.411263	0.229103	0.656734	1.00401	1.12351
EVM0000402	0	0	0	0	0	0	0	0	0	0	0	0
EVM0000403	148.815	152.179	143.023	149.311	153.981	143.381	111.532	103.696	93.5203	337.822	350.915	363.753
EVM0000404	27.3548	28.6009	27.1235	26.9734	24.1475	24.7028	34.0256	35.3581	29.4443	20.9248	20.804	20.0145
EVM0000405	0.336662	0.111904	0.419179	0.836601	0	0.236555	0	1.45054	0.60604	0	0	0
EVM0000406	129.836	122.634	122.75	112.079	135.641	136.115	110.874	111.609	119.143	156.05	164.136	162.212
EVM0000407	0.968436	1.15885	1.5374	1.54707	1.48596	1.68416	1.62861	1.18919	1.13316	1.74906	1.22238	1.78107
EVM0000408	0.279863	0.217058	0.16455	0.22078	0.275678	0.131097	0.428311	0.227765	0.326533	0.213947	0.163541	0.396511
EVM0000409	91.9976	96.6348	81.3244	71.983	61.6055	74.1301	86.7413	93.3389	81.2445	55.1485	59.9291	51.4224
EVM0000410	27.5044	25.8999	27.4444	30.0447	26.0265	25.6368	42.3913	44.763	38.3266	10.5357	10.1288	11.005
EVM0000411	17.9016	19.1403	20.6176	27.7502	17.3965	20.5449	25.2308	30.7236	22.7368	18.4751	17.4175	19.4612
EVM0000412	84.0269	71.8675	78.6583	75.5799	68.8942	68.8755	96.4034	92.8914	84.7751	55.1646	54.4875	55.6045
EVM0000413	198.816	200.812	191.704	175.711	184.511	190.754	145.287	138.752	149.93	271.815	286.133	261.971
EVM0000414	2.62649	2.92721	3.53475	3.29082	2.76574	3.50101	1.48469	2.09687	3.54604	0.930118	2.43765	1.47754
EVM0000415	0.544547	1.35753	3.1782	3.18966	3.20294	1.43484	0.261646	1.40773	1.47039	1.87331	1.93314	2.40357
EVM0000416	137.555	134.158	149.209	134.189	130.621	130.241	122.921	154.208	123.346	201.284	195.548	204.658
EVM0000417	49.1751	48.4048	46.0032	47.8741	39.0183	44.2077	78.2803	72.3634	69.1549	34.6507	34.2827	35.5413
EVM0000418	45.3842	45.9624	43.7336	45.283	41.9799	47.223	51.9022	50.7576	50.8439	25.689	25.8492	23.1576
EVM0000419	0.353585	0.440735	0.343945	0.345185	0.663104	0.388196	0.226522	0.0761725	0.119344	0.582846	0.464898	0.520228
EVM0000420	170.217	168.114	163.895	173.987	156.216	161.484	205.63	198.942	199.357	100.833	95.313	99.6126
EVM0000421	0	0	0.124077	0	0	0	0	0	0	0	0	0
EVM0000422	51.1738	46.2722	47.9474	46.5709	50.3339	51.9289	47.2644	48.8629	60.0013	80.9568	70.4456	65.8803
EVM0000423	6.35462	10.3692	6.06899	8.22883	8.4209	10.6553	4.9963	6.81374	7.53949	11.5514	10.7098	10.0932
EVM0000424	73.3801	72.7216	74.6275	79.3898	78.7696	82.3534	79.2216	79.9193	80.9284	55.6518	51.7118	50.6497
EVM0000425	0.774498	0.257438	0	0.137473	0.132043	0.13605	0.248089	0.500548	0.116184	0	0.407328	0.474798
EVM0000426	6.66532	6.10174	5.91815	4.5384	9.1654	4.72176	6.19515	7.06183	6.6877	6.20225	9.82678	12.3789
EVM0000427	2.47673	3.12351	4.08148	2.94802	2.9061	3.83883	3.36008	3.67215	3.80281	5.13721	3.90772	6.4306
EVM0000428	9.29632	9.66579	11.9631	10.3835	10.9011	7.22905	7.35377	7.47348	6.32653	7.60511	10.5534	8.92382
EVM0000429	16.9261	18.41	18.7894	19.2367	17.3771	19.2966	21.1067	19.6547	18.9673	16.6441	13.7163	16.4515
EVM0000430	10.1598	10.481	9.50238	11.1768	8.7123	8.859	8.65969	9.27712	6.97683	9.10808	12.0287	10.818
EVM0000431	1.59927	1.73651	0.829688	1.66536	1.34511	1.46084	2.15158	0.780931	1.21554	0.978074	1.17753	1.62095
EVM0000432	29.7208	26.6036	26.9051	30.6098	26.4679	22.2222	19.6901	27.2982	21.023	59.6619	62.8914	62.5568
EVM0000433	202.834	186.301	182.594	200.508	210.399	197.714	188.903	195.338	211.777	177.549	174.129	187.522
EVM0000434	142.358	145.765	136.387	139.122	141.844	146.695	135.366	145.671	145.364	102.845	106.042	107.489
EVM0000435	10.7808	10.5534	10.9767	10.0238	9.85883	9.72669	9.91253	10.2689	14.2123	14.3689	12.1561	13.2666
EVM0000436	183.576	181.741	174.483	167.635	153.034	159.601	189.59	187.763	132.785	823.167	995.581	916.638
EVM0000437	1.23204	1.82857	1.92644	2.19703	2.2568	2.23469	1.45929	0.777735	1.13471	0.887101	0.768512	1.01174
EVM0000438	19.299	17.3299	25.2247	20.0335	22.4715	21.0953	23.2682	19.7713	17.6341	13.4349	13.0938	15.2747
EVM0000439	2272.23	2325.25	2283.64	2020.85	2451.03	2252.85	1561.88	1401.93	1714.53	3356.92	3398.55	3437.88
EVM0000440	0.200105	0.399081	0.0622877	0.21311	0.136462	0	0.256392	0.25865	0.240144	0.229461	0.31572	0
EVM0000441	65.6125	64.1157	70.9451	71.1028	74.5184	74.3532	67.6342	71.8432	61.8681	66.4699	48.7771	50.5661
EVM0000442	0	0	0	0	0	0	0	0	0.404027	0	0	0
EVM0000443	1.47774	1.8182	1.96977	1.97992	1.30439	1.67054	2.13009	1.72524	2.10237	2.66479	2.68879	3.59443
EVM0000444	12.5955	13.7968	13.4594	13.2775	17.0843	16.0701	13.0081	11.3329	13.0306	23.4674	25.5749	25.2648
EVM0000445	7.85946	7.09794	8.17026	6.47512	9.25323	7.18958	8.2652	7.09209	9.47659	3.82606	1.6378	4.5818
EVM0000446	41.3548	37.8676	43.5673	41.5538	40.6383	44.5104	49.4451	53.1844	62.1998	42.8519	42.3358	44.3905
EVM0000447	41.0779	42.7321	42.6219	40.2371	33.0712	36.2128	50.8052	44.4108	41.88	89.6291	94.217	89.1644
EVM0000448	16.8846	14.3747	15.0072	16.1015	16.0582	16.4146	15.3241	17.046	16.2651	40.2893	35.6942	35.7817
EVM0000449	45.1431	44.331	41.981	40.7625	46.4977	36.5895	42.9011	43.9851	26.0764	92.6847	106.691	100.409
EVM0000450	674.4	684.702	617.937	595.578	597.987	525.613	485.112	530.202	468.139	654.807	818.553	853.983
EVM0000451	20.4235	21.927	23.6257	22.2491	22.2723	21.4309	20.8886	20.398	22.4478	14.1137	13.2585	13.6345
EVM0000452	10.9493	13.8359	12.336	9.91417	13.8304	12.8017	10.3941	11.689	16.1593	11.5898	13.0791	10.892
EVM0000453	3.17075	5.52062	6.43885	7.39685	5.04538	6.57766	4.25611	3.64305	5.07359	1.55825	1.9058	3.92461
EVM0000454	40.6802	37.0578	37.9754	37.2567	41.5425	36.2169	30.6615	31.881	30.7298	41.0011	36.9565	37.588
EVM0000455	29.8913	29.409	27.2283	31.4664	26.9022	27.3661	28.6209	29.7131	27.0111	43.2694	42.1579	39.0748
EVM0000456	18.8809	19.6998	18.1124	21.6053	21.9727	20.3824	11.8525	11.6531	10.9837	51.3716	46.6321	45.7579
EVM0000457	39.5826	43.8631	40.8464	40.1339	39.7493	39.4895	44.8181	49.272	44.5079	33.9675	33.0321	34.9384
EVM0000458	23.8409	24.5804	23.7924	25.1412	26.5212	24.8605	22.8354	20.8758	21.8971	32.0886	32.4945	32.2232
EVM0000459	0.280208	0.431827	0.309241	0.108516	0.130288	0.134241	0.318229	0.954863	0.160495	0.0876317	0	0.0374789
EVM0000460	27.9512	36.3553	36.2207	26.4243	31.2856	42.5885	36.0082	35.6054	36.4609	31.0066	32.4364	36.8034
EVM0000461	19.2809	19.4315	18.6192	21.3659	19.5548	20.4081	15.1703	14.2943	11.4708	31.8207	35.4802	33.6906
EVM0000462	0.88101	0.878527	0.853182	0.834018	0.934591	0.550257	0.877979	0.885711	0.646125	1.90827	1.39004	1.48826
EVM0000463	370.547	364.488	380.216	377.343	389.636	381.754	400.515	384.607	421.324	259.438	260.524	250.929
EVM0000464	15.9843	16.1883	19.2413	18.2201	15.0734	20.6639	19.2005	18.4011	20.7937	13.9618	15.5652	11.9425
EVM0000465	2.1472	2.08624	2.05653	2.16948	2.64699	1.68281	3.12154	1.85028	3.02283	0.473501	1.38986	0.405021
EVM0000466	27.4452	27.0963	29.4937	27.1411	28.7429	29.5577	29.3043	31.1109	31.5154	28.5679	30.2428	30.6855
EVM0000467	29.2318	28.6074	29.69	27.1007	31.4111	31.3618	27.382	26.0927	29.997	21.4677	19.0793	18.2487
EVM0000468	82.7177	68.683	81.5016	80.9839	69.4572	71.05	92.6329	85.8718	87.9352	88.2245	77.0728	81.4542
EVM0000469	0.550868	0.329589	0.797345	0.557337	0.39445	0.348359	0.31762	0.640834	0.49582	0.852774	0.391115	0.729441
EVM0000470	4.74534	8.63582	7.97638	8.46503	7.888	7.62721	4.33211	4.14025	5.01859	5.30547	5.24095	3.14181
EVM0000471	388.963	417	413.192	416.758	475.584	429.233	249.328	242.045	286.84	540.657	546.069	582.231
EVM0000472	77.6273	77.6659	81.064	77.1908	75.0334	82.242	87.5134	88.5136	96.3164	45.655	39.8163	42.0196
EVM0000473	16.5701	19.5276	21.6414	19.4364	14.3423	18.3803	12.5827	14.4534	16.6872	17.8383	14.1688	16.6223
EVM0000474	125.306	121.951	124.344	128.223	128.582	127.31	126.578	131.262	118.203	114.975	125.337	123.078
EVM0000475	0	0	0.158262	0	0	0	0	0	0.152541	0	0	0
EVM0000476	2.35116	2.64919	2.28241	1.55614	1.65774	1.38603	3.14017	2.73	2.30751	1.9421	2.32636	2.30617
EVM0000477	2.78597	4.48773	4.00249	1.93999	3.06908	4.96918	1.44158	1.24653	1.0609	8.66253	5.9172	7.56736
EVM0000478	13.6091	15.8418	13.746	16.505	19.7169	14.6363	15.3198	14.2162	16.6989	21.4021	19.7193	18.4702
EVM0000479	0	0	0	0	0	0	0	0	0.0758832	0.29003	0	0
EVM0000480	30.5333	34.0123	28.2121	25.0401	23.7875	28.6169	27.8868	30.1828	21.5973	35.7884	32.7771	38.8105
EVM0000481	0	0	0	0	0	0	0	0	0	0	0	0
EVM0000482	6.88489	5.8847	6.11618	6.38011	7.04277	6.33763	5.32729	4.33404	3.48072	11.9962	12.8731	11.9715
EVM0000483	0.0830434	0.0552062	0.129247	0.176881	0.0566318	0	0	0.0715598	0	0	0.174698	0.122181
EVM0000484	1.05452	1.05155	0.246185	2.43329	0.53935	0.463097	0.422233	1.02228	0.237285	0.755765	0	1.16363
EVM0000485	11.3783	9.69921	10.9681	11.336	9.29262	8.99431	7.67157	14.8259	8.3417	18.3087	12.0165	13.3657
EVM0000486	10.5692	10.1287	10.8952	14.1797	15.8663	11.7183	13.5861	10.8227	11.2426	5.43027	8.66272	11.1074
EVM0000487	85.9998	91.772	83.1555	81.6774	75.8807	75.6882	92.2878	89.6792	77.3329	245.816	252.011	242.589
EVM0000488	1.19221	1.10686	0.921365	1.18213	1.17749	1.16989	0.750613	0.637662	1.33209	0.353563	0.259453	0.241943
EVM0000489	4.77557	5.78059	6.80534	5.99731	7.65235	7.56451	5.22581	6.24414	6.1618	4.03591	3.61495	6.33583
EVM0000490	4.73773	4.08738	6.01496	3.68503	3.15831	3.70299	4.50165	3.30276	5.51004	3.20473	4.19948	6.34403
EVM0000491	115.49	118.92	116.322	113.078	130.577	130.663	106.365	111.058	125.385	81.7757	82.7321	76.0142
EVM0000492	64.8529	67.8247	76.2188	79.8493	89.9636	77.5224	71.5938	58.4746	70.6161	28.2958	27.4526	33.978
EVM0000493	0.0971268	0.0645686	0.0604664	0	0.231826	0.136492	0.342231	0.544022	0.437105	0.055688	0.0510814	0
EVM0000494	24.3239	24.4791	23.6836	25.606	22.6718	25.5479	26.6636	28.2492	24.7214	48.5944	47.7617	44.8686
EVM0000495	0.505848	0.504422	0.236187	0.808087	0.258724	0.399862	0.729155	1.63462	0.910598	0.435045	0.798114	0
EVM0000496	54.5663	54.8327	58.0382	67.5926	71.3345	63.0071	30.6217	29.8872	33.7537	213.353	230.857	238.447
EVM0000497	11.8784	12.631	12.2212	10.5793	11.3443	13.4612	15.7079	14.3346	13.0567	20.5219	14.3463	12.7594
EVM0000498	23.3188	22.8715	26.1824	25.2644	22.9402	27.333	30.988	27.5859	31.7028	16.1974	16.6351	14.8244
EVM0000499	0	0	0	0	0	0	0	0	0	0	0	0
EVM0000500	2.73625	3.48011	3.24371	2.80939	2.89956	3.29839	2.14135	1.94842	2.37434	1.69097	1.42183	1.68748
EVM0000501	3.11746	3.74634	3.06046	3.46196	5.09686	4.35286	2.5861	2.89301	3.06974	1.55825	0.756714	1.25448
EVM0000502	15.133	14.5014	13.7461	15.0539	12.6762	15.3454	21.4801	19.7385	20.5164	12.4773	11.3818	11.0777
EVM0000503	5.95027	6.59278	5.5004	5.76091	5.59486	4.68772	3.40771	5.20514	3.67864	2.68793	6.54328	4.15623
EVM0000504	5.90194	7.35663	6.31691	6.21301	5.9444	6.45973	4.86447	5.31075	4.14758	4.09972	2.65032	2.63845
EVM0000505	4.41233	5.14704	4.12035	5.05375	4.04513	4.51885	4.1201	3.92772	3.48435	4.22433	6.04219	5.32821
EVM0000506	43.7698	42.1325	41.0293	42.1459	38.604	40.4876	42.0373	43.2917	42.9849	18.2657	16.7284	17.9928
EVM0000507	5.86396	4.96679	5.14605	4.13831	4.93244	4.85873	7.57001	9.29187	6.35901	2.73426	3.14903	3.22237
EVM0000508	0.473466	0.782743	0.442135	0.424621	0.726484	0.512151	0.538798	0.531465	0.437367	0.342901	0.334194	0.733271
EVM0000509	142.14	134.402	140.371	117.065	151.648	151.022	159.716	161.473	183.76	154.873	151.408	154.91
EVM0000510	2710.07	2645.35	2659.63	2737.69	2778.35	2631.96	2593.81	2384.35	2158.98	2401.49	2700.32	2672.08
EVM0000511	22.8414	24.5426	22.4873	22.2139	25.2126	23.4396	15.2798	14.0526	13.8334	40.324	47.6043	38.2956
EVM0000512	88.2181	83.2835	85.4185	74.4806	87.1273	86.8035	87.5719	93.6671	104.728	73.1378	66.5474	73.6167
EVM0000513	7.96953	8.50533	8.05722	9.32923	9.06183	9.26739	4.0824	4.98034	5.54288	13.2549	10.5997	13.4698
EVM0000514	0.501124	0.928035	0.534815	1.14363	0.732307	0.0754529	0.206384	0.0925343	0.708788	0.246275	0.903612	0.105329
EVM0000515	751.02	753.455	710.773	659.791	590.639	578.942	735.711	717.826	538.213	521.034	535.722	560.092
EVM0000516	3.2276	5.29711	2.70006	3.65221	4.47093	3.96876	3.10162	3.47659	2.05775	2.31319	2.75839	3.16583
EVM0000517	76.8975	81.7076	71.3409	62.5857	64.8147	68.1024	87.7331	90.8638	96.1364	44.6484	42.8885	41.2234
EVM0000518	76.4082	87.5354	87.6314	90.4596	83.7251	91.9993	90.7723	102.918	104.161	51.6775	49.7435	59.4838
EVM0000519	0	0	0	0	0	0.304436	0.277572	0	0	0	0	0
EVM0000520	39.4315	39.5457	35.5561	37.6625	39.2955	45.7275	40.7153	41.3295	41.2877	29.3453	31.1961	26.9298
EVM0000522	30.408	30.8362	28.0136	27.1537	23.2592	23.8212	33.4455	36.1696	25.2136	15.7484	16.3829	16.2363
EVM0000523	4.13494	4.53561	3.15341	3.59634	3.38381	3.41385	2.45035	2.40512	2.97739	14.8174	13.3742	12.8772
EVM0000524	0.959871	0.5801	1.49392	1.02226	1.1009	0.58248	0.33542	0.488762	1.07339	2.25141	1.285	1.9686
EVM0000525	26.964	27.8033	25.7422	28.1971	31.9251	35.9171	39.0327	39.0798	45.415	29.2093	26.9741	24.9427
EVM0000526	1.47424	1.53616	2.15011	1.9758	1.69443	1.76331	2.14892	3.06175	1.84874	1.59555	2.06467	1.19419
EVM0000527	1.53839	1.53405	1.9115	2.19353	1.76875	1.99662	1.22177	1.3147	1.52198	2.90855	3.06914	3.72249
EVM0000528	0.0372114	0.148426	0.173745	0.158519	0.418711	0.470636	0.607902	0.144295	0.569379	0.0640058	0.5284	0.0547489
EVM0000529	0	0	0	0.421146	0	0	0	0	0	3.74104	3.43157	0.290908
EVM0000530	16.7238	15.6965	15.4931	16.8771	19.1863	17.5144	16.2114	14.2681	15.6743	20.6091	19.9941	22.6513
EVM0000531	162.757	150.135	159.157	170.601	161.607	155.422	169.388	157.295	165.031	171.006	160.977	161.91
EVM0000532	0.580723	1.73726	1.30151	1.60801	0.831655	0.244826	1.56256	0.900753	0.836307	0.599327	0	0.683532
EVM0000533	3.77491	3.83372	3.88933	3.81257	3.37701	3.34735	2.95827	4.30319	2.50752	0.670871	0.945041	0.799285
EVM0000534	41.833	42.0616	39.7544	41.8223	39.9484	34.4302	39.4905	37.1712	34.9548	36.6875	40.7807	32.2124
EVM0000535	0.0814151	0.162371	0.152055	0.173413	0.166564	0.0858091	0.0782372	0	0.512955	0	0.770728	0
EVM0000536	2.00338	3.60881	3.56058	1.10121	0.991607	0.953583	0.124205	0.334132	0.465338	0.222318	0.611784	0.0950828
EVM0000537	186.255	180.636	183.056	184.622	168.28	178.751	253.884	252.328	232.365	155.075	157.287	155.414
EVM0000538	50.5217	48.2115	46.0823	51.9994	47.7219	45.9164	52.1011	50.0731	44.4556	72.1677	88.7668	79.2579
EVM0000539	34.3628	31.5607	34.5659	37.7839	41.1634	37.4882	28.7924	30.4292	30.4134	46.196	44.705	51.4004
EVM0000540	10.6156	11.1648	9.17563	11.355	9.24325	8.66684	9.62088	9.18768	8.73941	7.83121	3.7383	6.63026
EVM0000541	6.56854	7.47151	7.16009	6.49008	7.81774	5.76482	3.45609	4.03533	2.47276	13.704	14.6195	14.9925
EVM0000542	2.08808	1.2206	1.7482	0.843509	0.957502	1.89722	1.52223	2.04752	0.777693	0.371548	0.568022	0.741563
EVM0000543	16.2945	15.7785	17.1654	14.9154	17.6324	19.6577	16.1114	13.49	16.2419	34.2815	27.7274	28.6301
EVM0000544	53.2222	57.1546	57.3466	56.8299	57.0125	53.741	58.745	59.2323	68.087	65.2181	60.9976	60.1666
EVM0000545	63.4421	56.6982	63.9947	62.6255	57.0909	54.8807	54.783	57.6347	49.0219	74.8943	92.0707	92.6817
EVM0000546	2.04017	1.77653	1.449	2.23397	2.26331	2.27142	2.62325	2.52564	2.12079	1.63104	1.40544	1.05693
EVM0000547	19.2977	20.032	27.6219	20.3835	25.0798	25.0072	36.1769	19.6278	25.7692	44.3483	46.1702	55.1561
EVM0000548	1.76037	2.74759	1.8583	2.11932	1.605	1.21003	1.06648	0.84091	1.06778	3.09376	5.6153	4.78591
EVM0000549	3.95864	4.00011	4.36209	4.72183	3.56348	3.44909	3.2969	1.77383	3.06422	10.8492	11.6589	11.105
EVM0000550	5.55924	6.00664	5.14769	5.8316	5.98404	5.26067	3.63106	4.04629	3.18445	9.55074	10.6794	10.6075
EVM0000551	2.7884	3.44257	2.2939	2.65145	2.30904	2.58902	2.13727	1.07268	1.19512	9.82082	6.80869	7.52136
EVM0000552	121.5	113.182	120.382	117.169	101.709	107.204	139.68	131.473	131.431	161.773	172.441	165.478
EVM0000553	36.6817	33.7333	35.4914	30.6016	29.8098	40.0576	42.8874	34.2434	47.8734	42.589	54.3387	50.6715
EVM0000554	16.1259	25.8057	22.3627	23.4471	19.5577	22.492	18.1874	19.3461	18.5993	15.4466	20.4153	18.6113
EVM0000555	77.0538	77.932	72.0282	76.63	69.9112	65.9955	84.301	80.3273	77.4051	69.2378	59.9201	56.569
EVM0000556	56.8598	51.5755	54.4738	59.5236	52.7781	55.8889	67.147	60.8652	60.5415	35.2813	37.0809	39.5979
EVM0000557	6.8993	6.51828	6.3487	6.95082	6.14055	5.37147	4.30708	4.4394	3.91629	13.4957	13.4917	13.4407
EVM0000558	9.52033	9.82621	8.28796	8.22024	11.0356	10.8547	9.61899	10.5519	13.2138	3.44346	2.28122	3.10908
EVM0000559	88.2093	83.8435	87.8803	87.2367	79.432	82.4484	123.097	117.257	111.381	44.3103	42.2967	41.9806
EVM0000560	5.6832	6.3023	5.30713	6.15693	6.56528	5.62847	3.57814	3.86296	4.49792	6.99451	5.48831	3.96459
EVM0000561	1.59518	4.21064	1.31438	4.19718	1.3438	1.18678	2.97567	0.727727	2.44927	1.77541	0.592197	0.69029
EVM0000562	49.3446	46.5652	44.1687	36.7862	35.3333	38.1813	39.3227	38.8912	29.248	34.5713	39.497	34.7066
EVM0000563	4.76045	7.0678	6.91512	7.54844	5.41068	5.68636	3.65971	3.69194	5.99864	4.36707	7.84473	3.73548
EVM0000564	30.3702	29.8113	22.5998	30.1541	28.3159	23.1734	14.7444	18.4011	15.3761	69.9234	58.1496	65.6288
EVM0000565	2.74611	3.68626	3.03289	2.75586	3.02516	3.39526	2.41055	1.70651	2.80442	2.81592	4.04111	3.80724
EVM0000566	42.9835	40.663	39.459	37.4302	37.9457	43.2058	46.9249	50.5869	54.9853	36.3143	36.8388	33.7942
EVM0000567	41.6117	41.5551	41.0939	44.5433	44.071	46.9361	52.8383	50.4945	59.0071	20.9505	20.0073	19.3424
EVM0000568	1.29083	1.44809	1.95879	1.78714	0.990322	1.97272	1.48853	1.0011	1.42325	0.888122	0.763739	0.617237
EVM0000569	134.829	132.994	129.45	130.981	134.509	129.332	112.631	111.561	104.393	157.685	152.623	152.814
EVM0000570	6805.24	7070.59	6236.43	6215.96	6032.81	5841.61	5380.89	5398.97	4919.56	4030.36	4487.56	4170.05
EVM0000571	4.86517	5.52062	5.98453	5.07417	4.42757	4.24365	4.86873	6.24522	4.56019	3.80906	4.28805	3.60373
EVM0000572	3.67307	1.91098	2.53523	2.55117	0.816804	1.68318	2.14851	4.12845	4.88717	0	1.25984	1.40978
EVM0000573	0.337804	0.561419	0.2103	0.239839	0.806283	1.00877	0.378721	0.8005	0.253373	0.290521	0.0888296	0.579844
EVM0000574	7.23968	8.21015	8.35134	5.74486	13.6497	10.922	6.82068	8.07342	5.74961	1.95336	0.895888	1.87971
EVM0000575	11.69	12.2303	13.1534	12.5518	14.2124	16.4615	12.799	11.8899	14.3165	16.9759	21.3165	14.9437
EVM0000576	30.7485	31.239	29.3205	28.3689	27.2002	26.8303	32.8743	30.8125	28.0161	27.999	25.8133	26.9042
EVM0000577	1.94181	1.93634	1.67828	1.50701	1.58484	1.95952	1.53847	1.789	1.87792	4.1928	3.76449	3.16091
EVM0000578	11.8551	10.9337	10.7541	11.2173	10.8286	11.2272	8.24415	8.95882	8.49329	19.7286	17.9812	17.2468
EVM0000579	17.6699	15.7664	16.1016	16.1105	19.6924	20.4026	18.1505	21.2654	23.7504	30.3565	24.9462	27.5065
EVM0000580	2.00281	1.55876	2.14398	2.96536	2.14868	2.41982	3.37985	4.73558	2.9898	0.840233	0.693655	1.36556
EVM0000581	0.244845	0.122078	0	0	0	0	0.235288	0	0	0.210574	0	0
EVM0000582	6.52031	6.79993	4.49052	5.4974	5.8361	4.06606	5.58701	6.14541	5.01288	2.24306	3.25773	4.63676
EVM0000583	0.0216541	0	0	0	0	0	0	0	0	0.223478	0.136661	0.0318595
EVM0000584	55.0008	53.0435	51.5922	50.4304	52.5255	52.2144	50.8795	51.0263	46.2682	52.849	50.7285	46.7172
EVM0000585	0.666686	0.507353	1.11407	0.504485	0.735814	1.16495	0.505787	1.56474	0.773768	0.0301774	0.0276811	0.283943
EVM0000586	0.51367	3.07333	0.639573	1.64117	0	0.541394	1.48086	0	0.770566	2.65063	2.43137	3.7788
EVM0000587	1.16588	1.00044	1.20906	1.09788	1.04197	1.26437	1.97245	2.21686	2.1236	0.105547	0.111338	0.0541691
EVM0000588	52.3847	50.6023	51.2362	50.8126	37.3488	41.1143	78.3885	79.3958	65.6569	65.6482	62.3692	65.7119
EVM0000589	0	0.0616446	0.230913	0.39502	0.126473	0.130311	0.0594059	0	0	0.106332	0	0
EVM0000590	3.43487	2.79316	2.48205	3.81053	3.42997	2.71519	1.41463	3.30344	2.9444	4.60697	3.93555	4.2415
EVM0000591	1.07732	1.43238	0.754523	1.72101	1.5612	2.83866	2.76072	3.2492	2.42416	2.47074	3.68283	1.84923
EVM0000592	1.52732	1.58923	1.59162	2.12163	1.49441	1.53976	1.1061	1.08723	1.25516	1.06606	1.04772	1.00958
EVM0000593	2.46446	2.62784	3.21282	4.18382	2.39617	3.06039	2.36827	2.99626	2.39389	2.60217	2.38692	4.77477
EVM0000594	14.218	13.8015	16.0971	12.5961	21.3656	13.394	11.6076	17.89	20.0452	34.1949	24.418	28.6941
EVM0000595	60.6934	55.2743	53.2944	58.7421	53.2758	54.4602	73.0369	79.776	74.868	27.9801	30.3026	29.8665
EVM0000596	0.0919299	0.0916708	0.120185	0.137067	0.244499	0.0387566	0.0353367	0.166357	0.0165487	0.06325	0.319098	0.108205
EVM0000597	52.5522	51.9446	49.8396	50.3791	43.794	46.7146	53.8586	52.9227	45.7225	55.2352	54.4625	54.1201
EVM0000598	216.258	204.752	219.09	234.184	220.299	220.074	244.137	224.64	252.476	152.059	148.735	145.941
EVM0000599	61.3268	61.4206	58.5468	57.0187	43.4689	48.5687	89.8056	83.8043	66.7394	42.1348	42.5713	42.5455
EVM0000600	22.856	19.1449	18.64	18.175	22.9125	23.7683	19.7675	14.1807	18.3776	48.7489	59.141	53.3563
EVM0000601	2.21449	0.249318	0.667081	0.570585	0.474976	0.790551	0.583498	0.646347	1.38238	0.982982	1.12709	2.1546
EVM0000602	42.2644	40.3948	41.4851	41.1285	52.2117	44.9724	35.1648	34.5582	35.4886	47.3809	38.1353	51.2566
EVM0000603	0.327265	2.93708	0.993228	0.348535	0.502154	0.862318	0.235868	1.05753	0.810043	0.422186	1.54905	0
EVM0000604	23.6895	23.8563	23.4103	26.6985	23.8865	25.1875	20.7135	18.877	20.7833	30.2247	29.9835	30.5262
EVM0000605	205.273	200.166	205.462	218.614	200.645	191.462	174.359	172.359	152.137	429.858	430.399	461.998
EVM0000606	3.67828	4.88305	4.55174	4.15767	4.3628	4.18599	2.5914	2.75641	2.56936	14.2646	13.3338	15.5383
EVM0000607	47.887	48.1622	42.304	42.3639	49.1053	52.0817	54.8827	55.8977	56.4818	21.527	19.5608	17.4627
EVM0000608	196.04	183.915	175.702	184.901	149.493	152.824	277.693	278.837	192.535	226.371	236.895	250.218
EVM0000609	36.4987	40.5237	37.902	43.9784	48.903	44.1617	17.3672	16.5088	16.0849	54.8782	58.6221	43.9704
EVM0000610	0	0	0	0	0	0.127155	0	0	0	0	0	0.177503
EVM0000611	35.5615	31.4856	34.6045	33.3083	27.6424	29.1699	61.5038	57.1461	50.1102	22.5546	22.4013	20.8569
EVM0000612	16.0686	16.8119	16.2842	16.3322	15.7957	15.4821	16.1736	15.6459	16.0862	13.4047	12.8437	13.2399
EVM0000613	46.1556	44.5615	46.4432	43.7806	48.0588	41.8768	42.5904	40.6824	38.2397	43.0886	32.2854	46.9824
EVM0000614	0.476804	0	0	0.507793	0.0812896	0.418781	0.229097	0.308152	0.143052	0.410066	0.626908	0.35076
EVM0000615	6.24596	6.80624	5.35161	5.88385	7.1796	5.76866	3.99732	3.94513	3.89469	7.33211	9.97663	8.18542
EVM0000616	8.0682	9.73303	11.0993	8.383	10.9506	10.1214	6.54301	8.95346	9.21027	6.56656	4.90563	6.71708
EVM0000617	18.6372	19.4697	16.9304	20.7262	18.5458	19.5763	14.6811	16.6336	16.0331	14.6111	10.4019	13.1508
EVM0000618	5.25941	5.85185	6.41065	4.42203	4.75707	3.09256	4.0433	5.86791	5.23214	15.4267	14.762	17.2683
EVM0000619	6.40807	4.65123	5.69908	4.68898	6.59961	5.42152	7.24711	8.95907	7.29793	3.52413	5.70864	5.70821
EVM0000620	44.198	46.0814	46.095	39.4821	48.5918	47.4541	59.2437	62.068	65.6671	30.1961	25.6616	25.6011
EVM0000621	0.787417	0.741576	0.817013	0.745417	1.07396	1.06045	1.42929	0.339265	1.0631	0.677203	0.345102	0.579262
EVM0000622	41.862	44.5948	38.4563	36.5724	42.6131	46.991	41.9287	42.6719	46.9913	39.7492	40.1126	40.0094
EVM0000623	114.05	112.02	112.77	114.984	98.5607	96.6975	116.033	118.568	101.394	115.038	115.59	124.44
EVM0000624	9.05368	8.33211	8.56002	8.60356	8.63127	8.48206	10.5055	9.2214	10.0522	10.8586	10.0576	10.5568
EVM0000625	0	0.517558	0	0.368503	0	0	0.166254	0	0.155719	0.595165	0	0
EVM0000626	7.73686	7.12574	6.70847	8.17042	6.76623	7.24584	10.5922	9.40478	9.97466	5.78197	5.06416	5.70357
EVM0000627	109.553	102.356	107.905	105.385	98.4279	101.739	146.645	133.242	135.212	68.3677	62.5442	64.4498
EVM0000628	5.6072	5.02518	5.63384	6.87872	8.56737	9.4258	3.13751	2.29358	4.21638	25.76	19.3736	21.8256
EVM0000629	49.2241	47.8182	50.9632	42.2378	48.5057	40.7433	54.1154	55.4997	56.164	37.7327	32.8175	37.294
EVM0000630	0	0	0	0	0	0	0	0	0	0	0	0
EVM0000631	127.196	127.406	133.874	123.783	110.108	111.478	174.163	185.468	151.572	117.597	119.522	119.99
EVM0000632	0.894313	1.52879	2.86332	2.85731	3.13653	2.55843	4.29703	4.62387	5.05966	4.83457	5.44252	3.57145
EVM0000633	8.8051	9.15479	8.6511	9.06628	6.3604	7.21314	10.1056	9.06185	8.33838	7.39321	6.84747	5.70998
EVM0000634	10.3959	10.6136	10.2775	10.8483	9.27942	9.71164	10.4113	10.0504	8.98826	27.2731	27.8134	30.2264
EVM0000635	6.64347	6.94021	3.84048	3.70608	1.94166	4.16787	7.75219	6.95153	6.40671	4.35321	6.23922	4.4218
EVM0000636	15.0401	18.5861	13.097	15.1332	18.3109	14.3931	15.5171	12.0459	20.6794	8.8878	9.02608	10.8606
EVM0000637	3.60796	4.06202	3.68319	4.32448	4.12723	3.7209	2.82093	3.10904	3.56168	5.2272	4.8356	4.87076
EVM0000638	2.69014	2.09939	3.05824	1.61934	2.39289	2.21895	3.48431	1.20946	2.84241	3.4201	1.47632	2.40921
EVM0000639	15.2246	12.6186	14.3556	16.0562	17.5963	16.4631	14.5829	13.9925	16.5952	19.0453	25.5028	23.1272
EVM0000640	13.5438	12.3996	15.128	14.1132	15.825	16.3668	17.4751	15.8086	15.1329	14.7609	15.5663	15.0311
EVM0000641	8.81609	7.90979	10.0356	7.80359	7.97128	7.33055	13.1439	11.3654	11.0338	2.96082	3.74353	3.45667
EVM0000642	330.762	336.974	329.149	344.167	305.034	321.498	242.953	243.163	205.964	237.506	239.268	244.842
EVM0000643	94.4753	98.2808	93.4537	92.7736	95.7972	103.972	110.236	116.06	120.342	76.4157	73.5446	71.9956
EVM0000644	286.02	277.889	285.956	288.731	291.626	273.408	276.647	260.237	254.207	561.789	551.986	574.494
EVM0000645	63.0136	63.0561	61.9355	76.3939	68.071	57.4003	32.8222	37.1588	32.4805	198.931	232.186	200.199
EVM0000646	0.71958	0.620585	0.435868	0.455666	0.676398	0.327964	0.429847	0.452486	0.420112	3.14448	3.19121	4.86436
EVM0000647	6.96831	8.46379	8.80673	8.25818	9.00391	8.78014	9.96895	7.58489	10.8463	5.40718	7.68782	7.169
EVM0000648	0.307568	0.920103	0	0.163779	0.943863	0	0.738907	0.596332	0.692083	1.05807	0.727909	0
EVM0000649	0	0	0.110783	0	0	0	0	0	0	0	0	0
EVM0000650	10.2154	10.6717	9.99366	11.3234	9.38334	8.49618	10.1505	9.701	9.88259	12.3117	16.3368	12.3715
EVM0000651	26.0102	28.64	25.615	25.9823	26.6727	25.7134	24.1887	25.528	25.6185	31.9724	35.743	39.3133
EVM0000653	4.99131	5.67174	6.04307	4.45036	5.69946	6.57587	3.59736	3.48839	3.81343	11.7799	10.9428	11.1009
EVM0000654	25.1315	34.8671	32.0396	35.8417	37.3323	30.1732	39.271	38.1339	27.3409	31.5751	35.5143	25.4009
EVM0000655	15.3849	21.0946	13.3873	19.1777	19.6721	26.3497	14.9524	11.0729	20.1418	16.2386	15.1712	15.9479
EVM0000656	4.82786	6.17212	5.31759	7.38287	6.93299	5.15366	4.13384	5.36032	3.87188	10.1673	6.15242	7.83175
EVM0000657	0	0	0	0	0	0	0	0	0	0	0	0
EVM0000658	81.8629	79.0589	85.9054	78.2663	93.1195	88.7405	104.336	110.178	115.12	61.1967	54.3586	57.6373
EVM0000659	0.0484689	0	0.0452616	0	0	0	0	0.0626497	0.0436254	0	0.458838	0
EVM0000660	19.0658	20.1011	19.3764	22.098	18.5721	17.2173	16.8787	14.6453	16.0958	24.9676	28.7893	25.2397
EVM0000661	135.022	143.076	149.639	157.392	159.827	166.784	113.201	116.682	127.482	530.623	533.558	567.917
EVM0000662	0.0961892	0.127891	0.20959	0.0682939	0.262387	0.0337936	0.431362	0.372995	0.375168	0	0	0.566091
EVM0000663	226.232	242.014	247.7	228.88	241.728	232.115	230.258	238.272	240.715	209.097	214.532	218.097
EVM0000664	34.2619	33.0195	34.9211	34.0413	38.36	31.377	33.7276	35.2398	44.3769	43.8401	37.9062	38.5755
EVM0000665	0.830434	1.65619	1.86116	1.23817	1.69895	2.10061	6.38416	2.14679	3.13929	0	3.66866	1.46618
EVM0000666	7.17351	6.46777	6.1685	6.20729	6.20673	7.37166	6.46267	4.98386	5.811	4.83273	3.53693	4.83741
EVM0000667	21.6067	21.9291	22.8336	17.5653	25.8776	25.2446	18.0663	19.0826	20.5895	33.8583	32.2706	35.5797
EVM0000668	18.3849	18.6943	18.0929	19.2198	19.2923	18.4609	15.7799	15.2946	14.9031	23.7312	22.5047	21.3768
EVM0000669	2.18762	2.22451	1.81439	2.36046	2.47335	1.95681	1.75647	2.00913	2.34468	2.0052	2.67951	2.39281
EVM0000670	8.24765	7.88525	7.83422	8.5724	7.07414	7.37841	5.66512	5.1655	4.05612	26.9591	31.3473	26.2294
EVM0000671	108.447	107.929	98.7593	106.629	93.1148	90.7653	151.193	145.033	123.973	46.9278	45.8078	42.151
EVM0000673	10.3243	15.8158	17.4658	11.1547	15.612	17.8205	13.9474	10.4439	17.5078	7.97843	12.9843	10.7872
EVM0000674	5.41149	6.31474	5.4566	6.06976	5.30003	6.94742	3.9002	5.99019	4.04167	10.1003	12.6255	11.6041
EVM0000675	18.4971	19.1255	20.8424	14.3201	19.41	17.7688	17.3815	13.763	20.8876	13.1491	10.446	6.62792
EVM0000676	0.440938	0.58626	0	0	0.15035	0	0.282485	0.759927	0.132292	0.252813	0	0
EVM0000677	2.01001	1.59979	1.65314	1.7675	1.82974	2.2351	0.81515	1.59699	1.16184	3.61593	2.99677	3.49994
EVM0000678	20.2072	18.3285	19.4904	20.1055	18.2354	16.7465	25.4834	21.1102	20.9784	25.6159	22.4487	25.9024
EVM0000679	18.2405	15.9125	17.3632	17.9221	17.3105	17.5629	20.1974	19.8961	19.892	11.9831	12.1802	9.41899
EVM0000680	111.955	110.259	107.849	91.2249	89.0377	84.932	96.2057	95.6119	86.0951	61.6326	60.1738	58.1493
EVM0000681	14.145	13.1466	13.3023	13.4556	12.1834	13.0795	15.1286	15.9275	19.3726	13.9583	12.193	13.7213
EVM0000682	1.014	1.23778	0.799971	0.893716	0.769	1.19771	0.554414	0.610142	0.582224	1.4735	1.76537	1.10606
EVM0000683	36.2231	35.8264	36.2251	34.1998	34.82	31.7474	32.6491	30.5167	29.8286	76.2916	73.5273	77.0319
EVM0000684	24.972	24.2742	24.4213	24.5847	29.0847	28.5994	25.5845	22.2643	24.6357	23.878	24.3847	24.7063
EVM0000686	1.88904	1.88372	2.1434	1.25468	2.20247	2.67607	0.878375	0.840164	2.04764	3.21433	2.66	3.31728
EVM0000687	43.127	44.5942	42.9446	53.1801	49.3388	49.462	35.4585	34.9166	36.4707	40.1114	38.5073	39.7977
EVM0000688	1.62269	0.951831	3.07519	1.21987	1.904	1.55936	0.825538	0.740274	1.63236	3.52994	1.43072	1.4746
EVM0000689	0.285653	0.315367	0.333438	0.293354	0.302639	0.193545	0.352933	0.369228	0.247925	0.754558	0.611658	0.57038
EVM0000690	26.2145	27.8822	27.6633	24.9673	25.5101	26.0363	28.3866	28.197	28.1144	38.8223	41.3341	45.5122
EVM0000691	445.873	463.345	458.332	447.824	479.041	473.7	448.01	434.074	480.463	252.038	226.046	257.038
EVM0000692	13.4491	13.4111	14.5519	12.7376	13.5544	16.2672	10.635	10.9692	12.9985	4.35348	4.85466	3.86989
EVM0000693	0.301976	1.05394	0.42299	1.28641	0.772251	1.11396	0.290189	2.14679	0.4077	2.85679	4.7645	1.55504
EVM0000694	1.18791	1.06939	1.47906	0.790695	1.18139	1.16507	0.665897	0.853031	0.623699	0.595953	1.1714	1.11662
EVM0000695	0.620885	1.23827	1.30455	1.48779	1.74659	1.14519	1.04414	2.00635	2.37507	2.13592	0.979616	0.685129
EVM0000696	5.00222	5.34674	5.67873	4.9095	5.18381	5.72016	5.15257	5.45151	4.91433	3.31793	5.57109	4.90649
EVM0000697	214.12	232.713	221.717	216.68	216.134	199.319	140.016	127.466	120.781	571.845	619.236	667.277
EVM0000698	78.298	77.6337	72.1475	85.1241	79.6384	87.369	62.559	53.4782	62.4654	130.851	111.838	103.2
EVM0000699	0.854858	0.365335	0.79829	0.780359	0.499692	0.386141	0	1.26282	0.329757	0.210058	0	0
EVM0000700	10.3977	10.3684	7.65788	6.0803	4.8314	5.63444	6.41741	6.91	3.58153	16.6646	14.6856	17.1308
EVM0000701	161.47	165.043	174.519	168.572	167.996	170.846	181.013	178.619	194.066	98.65	99.3959	97.7451
EVM0000702	0.258869	0.344185	0.771261	0.590771	0.529609	0.49371	1.55181	0.987887	1.07624	0.19083	0.0777973	0.0906838
EVM0000703	9.86703	10.1329	6.96788	11.2402	10.5954	9.77869	8.06668	5.32997	7.33457	7.59935	7.20308	8.08925
EVM0000704	1660.92	1641.17	1632.98	1598.2	1509.98	1401.56	1124.37	1181.64	1029.06	3034.81	3042.74	3209.81
EVM0000705	20.045	19.4173	17.8272	19.213	22.2621	21.0262	10.9154	11.3509	9.96599	20.1946	19.7289	19.2401
EVM0000706	0	0	0	0	0	0	0	0	0	0	0	0.0450438
EVM0000707	69.8213	72.5345	74.6885	74.0906	74.9235	72.2226	66.2997	66.6391	67.0596	41.7674	46.782	43.4658
EVM0000708	12.8653	13.9446	13.5006	15.3511	16.0652	15.6004	9.92356	6.00658	10.6889	26.8657	30.0065	26.5254
EVM0000709	0	0	0	0	0	0	0	0	0	0	0	0
EVM0000710	37.8928	35.6402	30.3982	31.9595	29.5366	27.9999	21.9009	24.0977	21.7632	45.8298	49.5699	48.9301
EVM0000712	166.827	153.894	153.791	165.848	173.007	166.471	196.977	198.1	205.66	112.575	91.8463	90.4868
EVM0000713	13.862	10.6743	14.5987	11.4822	12.9982	15.3406	12.2108	13.3387	13.3778	9.4049	12.3936	16.0894
EVM0000714	12.8888	14.0802	10.935	12.471	14.685	14.3022	7.12428	7.44945	7.87533	31.2265	25.0474	27.327
EVM0000715	713.615	689.619	688.211	682.577	691.959	659.167	615.279	573.006	529.838	591.612	607.598	631.605
EVM0000716	180.605	180.449	190.205	168.394	137.894	133.346	212.224	253.791	154.887	94.2538	99.1547	84.8014
EVM0000717	141.365	145.47	138.658	149.738	150.948	162.628	170.636	165.907	157.412	102.555	116.05	110.583
EVM0000718	7.00679	6.72825	7.99716	9.12044	13.804	5.47033	6.48391	4.36068	8.17523	8.4811	4.50394	7.25452
EVM0000719	1.14005	0.976513	1.01001	0.575941	1.07649	1.2786	0.561821	0.887938	0.539374	0.930196	0.807127	1.69885
EVM0000720	32.3598	31.0835	33.6604	32.3321	34.8101	34.8674	33.9448	32.6881	38.7536	19.951	19.2738	20.9612
EVM0000721	2.09296	1.21184	0.630473	1.22235	1.17407	1.99245	0.259519	0.872681	0.789987	1.97421	2.98265	2.48336
EVM0000722	4.30277	7.89477	6.26814	5.86549	7.13032	4.44429	9.92356	11.0121	10.9213	5.32873	4.34483	5.19112
EVM0000723	3741.87	3622.38	3720.36	3585.84	3342.15	3190.2	3435.27	3468.43	2788.93	3498.41	3650.03	3835.59
EVM0000724	0.229085	1.1422	0.855704	0.487948	0.585846	1.08652	0.990645	1.33249	0.206193	0.985101	0.180722	0.84263
EVM0000725	109.873	113.385	113.578	126.81	119.711	137.078	139.469	119.23	155.009	123.941	128.202	126.317
EVM0000726	557.671	544.961	552.577	562.955	572.566	591.443	598.933	573.798	584.722	435.604	489.183	485.773
EVM0000727	0	0	0	0	0	0	0	0	0	0	0	0
EVM0000728	2.3529	0	0.775482	0.589604	0.566318	0.583502	0.931023	0	1.37032	1.4284	0.218373	0.407271
EVM0000729	14.1398	15.3395	18.5729	16.162	19.4973	18.2875	15.3299	13.3226	19.3467	14.5215	12.4214	11.7355
EVM0000730	218.367	226.374	226.169	225.265	210.968	207.444	214.615	208.224	163.232	380.169	400.14	406.473
EVM0000731	7.67059	10.5909	12.122	10.1939	11.2667	9.67385	10.8993	7.881	10.1496	10.0364	11.1715	14.4688
EVM0000732	10.0415	12.2524	12.4038	12.0703	12.0704	9.64565	9.34416	9.39223	8.21813	16.3245	18.116	16.7999
EVM0000733	0.0633919	0	0	0	0	0	0	0	0	0	0	0
EVM0000734	4.87594	4.55831	5.40703	6.65333	2.33801	7.54805	5.27132	4.72689	5.76016	1.57255	3.12534	1.79349
EVM0000735	0.316787	0.225638	0.591648	0.867538	0.277758	0.715466	0.434888	0.292479	0.203665	0	0.142805	0
EVM0000736	30.9027	32.4758	39.2102	31.1813	30.5313	32.6989	49.0519	51.3341	44.518	62.8634	67.5941	67.6329
EVM0000737	12.785	12.324	16.1508	14.7506	13.4051	10.7426	14.8797	16.5256	17.4529	9.04074	8.40494	10.189
EVM0000738	12.6908	13.4167	12.7831	12.702	11.6899	13.1503	15.3177	15.0872	14.2095	8.16393	6.94222	7.79243
EVM0000739	0.0179748	0	0	0.038286	0	0.0189449	0	0.0232337	0.0970713	0.092753	0.11344	0.132231
EVM0000740	0	0	0.35028	0.0665802	0	0	0	0.0808078	0.168809	0	0	0
EVM0000741	1.92033	2.36807	2.42295	3.54387	2.87907	3.7235	1.63407	1.68636	1.79441	7.33739	7.44742	7.31147
EVM0000742	3.34826	4.1322	3.49818	4.16607	2.33988	3.73861	2.13442	3.47087	2.1782	12.6588	11.8732	10.3891
EVM0000743	231.473	212.185	243.833	261.235	245.82	253.721	310.097	300.551	311.911	118.46	123.875	120.782
EVM0000744	8.70282	8.96438	8.79673	10.4397	10.1252	11.1381	6.34127	7.66418	6.80021	15.6274	16.3717	17.096
EVM0000745	3.09525	3.68878	4.93488	4.34163	1.69895	3.18274	2.82934	2.6347	3.19365	6.10315	6.55118	9.21914
EVM0000746	6.33858	2.80031	3.44659	5.55424	3.6113	4.82023	4.08648	5.39291	5.27186	1.5181	1.89889	1.65269
EVM0000747	0	0	0	0	0	0	0	0	0	0	0	0
EVM0000748	334.888	334.54	344.348	360.916	365.722	363.776	385.923	350.267	394.388	199.896	196.79	196.912
EVM0000749	0	0	0	0	0	0	0	0.346257	0	0	0	0
EVM0000750	6.34078	5.58133	8.15078	7.75332	6.80649	5.77543	5.60432	6.32402	6.76403	9.89666	9.44853	9.32916
EVM0000751	13.7895	13.1089	16.0533	16.2522	14.2938	13.6617	19.5235	17.5863	16.8797	12.3338	9.4279	10.55
EVM0000752	215.942	222.238	222.85	215.96	226.302	216.572	171.892	177.463	177.577	167.997	159.586	164.374
EVM0000753	10.838	10.8075	9.77498	9.84453	10.5594	10.778	12.7828	10.8034	12.1756	6.3987	6.88573	6.87122
EVM0000754	448.657	406.488	479.55	428.314	358.376	390.046	685.333	639.716	540.672	262.863	259.761	282.247
EVM0000756	5.44405	6.35934	6.64929	6.60774	6.29373	7.6505	6.07857	5.38374	5.95782	8.62091	8.97124	8.97607
EVM0000757	27.4941	16.2261	17.2911	16.1344	29.7317	19.0427	42.3813	45.982	54.7456	11.7746	10.2694	14.8599
EVM0000758	1404.57	1480.38	1441.27	1266.2	1487.39	1454.57	1210.42	1206.26	1334.39	1238.42	1224.03	1257.99
EVM0000759	3.66318	3.7205	2.40721	3.39554	5.03094	3.82514	3.61798	2.7182	3.44977	10.1514	10.6496	7.28597
EVM0000760	12.6793	11.55	13.4403	13.5033	11.3575	10.8353	15.8067	15.3258	9.99341	9.07729	11.3542	14.4198
EVM0000761	18.8799	17.6943	17.1004	15.874	22.2171	22.592	11.7316	12.8441	14.1824	26.1262	21.0534	27.9868
EVM0000762	75.2304	76.1134	77.1883	77.796	72.4617	74.7671	83.5005	80.1499	75.8548	91.2218	88.783	96.7174
EVM0000763	151.665	147.913	141.208	141.397	126.463	132.926	177.512	175.517	153.659	94.5929	89.0734	96.8553
EVM0000764	167.25	160.624	166.02	175.402	140.841	153.902	237.543	238.027	226.271	90.8727	89.3204	86.4778
EVM0000765	9.62372	10.8349	6.37779	9.75327	13.6551	8.99793	10.8889	8.0254	7.82377	12.0145	19.8372	17.585
EVM0000766	118.788	114.673	119.163	116.95	108.84	111.662	131.376	139.483	134.459	76.1363	75.038	75.4362
EVM0000767	146.419	147.112	131.142	134.738	129.573	130.22	111.306	114.844	88.713	169.763	175.66	175.395
EVM0000768	137.822	136.053	143.631	138.756	123.84	130.516	189.049	177.667	167.607	87.836	86.5899	89.0364
EVM0000769	65.5205	61.0813	59.1927	50.9548	39.8241	42.9597	50.7365	55.8364	32.5723	62.2466	72.7242	70.2823
EVM0000770	1.0658	0.903374	0.447872	0.227013	0.654142	0	0.307259	0.275524	0.431682	0.824956	0.588556	0.627241
EVM0000771	166.568	154.937	148.128	151.759	134.931	137.123	201.818	193.523	190.112	68.5216	64.9422	66.58
EVM0000772	5.8934	2.13701	3.25202	5.42056	3.56232	3.10574	4.37624	5.88637	4.82225	4.60773	2.9586	6.30613
EVM0000773	24.0105	24.2118	19.6707	21.1447	17.7842	19.1402	23.924	27.4778	25.682	15.6063	14.7627	14.9568
EVM0000774	0.109268	0	0.102037	0.232739	0.33532	0	0	0	0.0983486	0	0	0
EVM0000775	159.456	152.745	161.877	168.194	185.044	168.697	144.078	165.054	175.342	342.112	337.834	360.501
EVM0000776	0	0.0678764	0	0.0362462	0	0	0.0327057	0.0439917	0	0	0	0
EVM0000777	29.353	33.9928	33.768	34.6757	31.9437	32.965	34.465	30.7991	34.3235	34.0269	27.3982	32.4446
EVM0000778	0.322499	0.321589	0.205335	0.281012	0.089971	0.386255	0.211303	0.435801	0.382631	0.378216	0.393187	0.496058
EVM0000779	3.34563	1.6681	2.67792	4.19934	3.91126	4.65962	3.44469	6.95006	5.59243	3.69944	3.95899	2.98861
EVM0000780	2.57601	2.52246	2.60059	2.2244	3.96449	2.59274	2.96609	1.85982	2.00527	5.74818	4.76006	5.22415
EVM0000781	15.4162	15.3258	15.8686	15.24	14.1566	14.5614	18.0714	17.6753	15.3374	26.031	25.4744	28.7418
EVM0000782	304.858	326.036	325.19	299.236	335.719	350.391	324.748	335.503	416.471	200.212	177.369	164.591
EVM0000783	0.658701	0.609927	1.09842	1.10238	1.05884	0.743841	1.49205	0.729789	1.48219	3.15623	3.63748	3.25355
EVM0000784	13.8209	13.6052	11.02	10.3034	12.9415	11.6908	9.3651	8.42838	9.76043	20.5421	17.6127	21.5338
EVM0000785	0	0	0	0	0	0	0	0	0	0	0	0
EVM0000786	0.182513	0.545995	0.852178	0.194375	0	0	0.175389	0	0	0	2.30371	0
EVM0000787	1260.22	1255.29	1277.12	1288.22	1246.93	1158.95	1142.67	1109.8	999.635	964.924	1067.3	1021.76
EVM0000788	102.151	96.3772	95.035	103.634	96.2385	98.9393	115.208	103.212	106.517	79.6439	75.7117	74.1514
EVM0000789	1.29247	1.36773	1.29315	1.37647	1.26814	1.65413	1.60956	1.63652	1.75684	1.17962	0.624253	0.931398
EVM0000790	26.4262	31.7406	31.9445	25.266	33.0577	37.4213	28.199	32.7607	34.1946	18.8697	16.9677	17.5718
EVM0000791	1.08161	1.36617	0.404014	0.230381	0.221282	1.74797	2.14807	3.07573	2.20665	0	0	0.106091
EVM0000792	34.7978	32.4048	32.0291	31.3603	30.4053	29.1361	29.4162	24.2993	23.4342	42.685	42.0413	48.3014
EVM0000793	12.7206	12.3336	14.8383	14.8599	13.0123	13.8247	12.7317	13.5407	13.5492	9.23663	9.02813	12.2397
EVM0000794	0	0	0	0	0	0	0	0	0	0	0	0
EVM0000795	16.3805	15.993	15.1443	16.0738	16.8728	17.5566	25.1545	26.5031	29.9273	8.21433	9.15494	8.72895
EVM0000796	680.708	662.515	683.311	717.733	752.399	737.129	671.925	629.62	656.417	677.387	662.158	700.142
EVM0000797	53.022	57.2612	47.801	47.1498	51.1294	55.221	67.668	75.578	78.5175	26.7655	32.5699	26.6718
EVM0000798	0.0221745	0	0	0	0	0	0	0	0	0	0.0349863	0
EVM0000799	0.483026	0.351986	0.190834	0.118712	0.209043	0.411193	0.089264	0.264147	0.384594	0.351507	0.468989	0.410004
EVM0000800	1.21684	0.898821	1.05816	1.15193	0.987891	1.02465	1.19409	1.0985	1.21693	2.29237	1.71673	2.03662
EVM0000801	82.9862	88.1463	77.0502	85.4385	77.427	73.6538	82.9684	85.0347	75.2592	188.083	187.069	181.142
EVM0000802	0	0	0.147711	0.168458	0.161805	0	0	0	0	0	0	0.232726
EVM0000803	55.5962	61.0119	54.2716	51.7911	54.292	50.3236	44.2095	45.3548	43.2093	76.4941	80.3366	88.4524
EVM0000804	293.538	283.411	277.929	303.725	317.441	298.429	330.389	295.615	318.885	315.317	275.92	283.827
EVM0000805	10.0213	14.0461	15.3133	14.8521	12.4016	12.4087	14.9502	12.138	11.4167	21.3355	21.6714	23.8176
EVM0000806	9.53027	6.37812	7.94396	8.37859	11.9079	8.49411	8.05191	9.5903	9.72931	6.8211	6.05501	5.83459
EVM0000807	68.0757	66.9519	65.6875	70.2274	64.6761	65.1806	67.441	66.0589	60.2132	72.021	76.7449	74.9761
EVM0000808	54.976	52.5529	51.5786	50.6648	51.8246	47.223	28.6833	30.2326	26.9043	87.5123	78.8512	84.0115
EVM0000809	0.553623	0.552062	1.55096	0	0.283159	0	1.59604	0.357799	0.498299	4.76132	3.49396	2.03636
EVM0000810	42.4799	31.7701	45.9324	31.6345	36.5112	39.9755	46.8069	43.968	43.7689	25.5463	30.3622	28.3132
EVM0000811	820.821	802.385	805.98	851.316	748.772	715.911	737.286	830.981	663.708	1167.69	1200.55	1208.88
EVM0000812	0.469172	0.467849	0.17525	1.39906	0.095986	0.890088	0.631202	1.33417	0.33783	0.322801	0.148049	0.276116
EVM0000813	0	0	0	0	0	0	0	0	0	0	0	0
EVM0000814	84.4042	82.7929	91.3583	84.4421	90.3145	88.0783	80.7788	83.0956	86.772	56.5154	53.2373	53.9142
EVM0000815	37.8202	36.8996	36.0798	34.2836	33.0861	33.3731	39.5959	41.6976	33.949	28.7824	27.2869	28.2226
EVM0000816	116.388	114.511	112.874	109.188	95.9708	88.8742	104.268	104.675	89.7994	164.652	173.876	182.668
EVM0000817	16.5196	16.2954	17.4639	16.4078	17.8549	16.895	13.1363	13.8707	14.2677	17.922	13.6995	16.0506
EVM0000819	6.3113	5.63103	2.48154	5.30644	6.56928	7.00202	3.51129	3.72111	4.58435	2.09498	1.04819	0.651634
EVM0000820	1.56643	1.85554	1.90946	1.39393	1.51631	1.74515	1.82352	1.97037	2.07226	2.12474	1.67529	1.91799
EVM0000821	0.101375	0	0.236668	0.107964	0	0	0.0487092	0.196553	0	0.0871859	0	0
EVM0000822	3122.4	2993.68	3030.48	3457.94	3445.6	3277.97	2803.86	2810.59	2683.6	9260.61	9555.61	9451.88
EVM0000823	21.2029	23.0416	19.7695	20.5187	21.0399	19.7747	16.7318	21.1174	20.0801	18.3331	23.3891	20.8291
EVM0000824	43.2273	46.0609	46.4245	44.0714	52.5703	55.639	51.213	53.8506	73.3859	48.2865	38.8218	41.6322
EVM0000825	5.5819	5.6201	4.26296	4.98847	6.4513	6.64706	3.93985	4.22274	4.97542	11.5363	12.0499	11.4913
EVM0000826	2.10437	1.08306	1.01425	0.650653	1.11103	1.21629	0.978498	1.93036	18.3909	1.16763	1.39235	15.8802
EVM0000828	29.7968	28.892	30.8997	32.5224	29.5539	37.42	34.8035	32.4856	40.7475	38.0853	36.8829	43.2344
EVM0000829	2.03704	2.27505	1.5218	1.88741	1.3336	1.65318	1.19409	2.0011	1.11842	4.48491	3.63181	3.20689
EVM0000830	6.81588	7.20639	6.69213	7.43905	6.49006	6.40678	5.85305	6.07642	5.92811	6.69333	5.12909	7.62781
EVM0000831	73.1407	78.7999	74.3507	68.1803	56.157	64.2851	89.9462	100.104	78.8754	34.1642	31.8088	32.735
EVM0000832	220.065	234.166	223.382	251.319	220.156	216.139	244.504	262.088	233.785	126.175	132.843	125.575
EVM0000833	24.1068	24.0388	24.7702	24.3856	25.3193	28.212	29.1316	32.723	40.4929	17.6123	13.484	14.9465
EVM0000834	4.5218	5.00581	4.12417	4.06069	4.2629	4.13982	5.49607	5.38659	5.03569	4.25141	5.04848	3.7775
EVM0000835	13.1485	9.43106	9.69352	6.87872	12.5062	10.2113	9.97525	9.54131	9.55074	15.8711	18.5617	15.2727
EVM0000836	3.81971	5.72752	5.20511	4.67063	5.09396	5.72568	4.29598	4.35211	4.99148	9.29553	10.3569	12.6552
EVM0000837	139.906	138.55	144.623	138.576	146.402	148.247	153.872	148.844	163.764	113.842	114.456	113.931
EVM0000838	20.3737	22.3989	19.5031	22.5149	21.5821	22.7311	16.6294	17.2441	21.215	10.8504	12.5083	13.2947
EVM0000839	1.05081	0.785888	0.899504	0.839331	0.268727	1.10753	0.673198	0.452751	0	0.301243	0.552648	0.386514
EVM0000840	0.319398	0.477746	0.298262	0.850391	0.816804	1.51486	0.460396	0.619268	0.718701	0	0.251969	0.234964
EVM0000841	0.14194	0.136485	0.0473384	0.156564	0.0674119	0.181658	0.1023	0.150706	0.127756	0.33134	0.311929	0.290878
EVM0000842	86.3172	82.9685	83.6626	94.0532	77.433	76.6688	88.2426	96.6058	75.7511	120.727	97.8898	102.562
EVM0000843	1536.85	1459.4	1542.12	1478.14	1631.52	1601.09	1737.1	1541.08	1688.72	1316.79	1258.81	1322.3
EVM0000844	1.39462	1.13784	1.42073	2.29541	2.8532	0.668132	0.48734	1.14714	2.3964	0.436151	1.20022	1.11922
EVM0000845	1.52841	0.609639	1.71272	0.922387	0.938072	1.34241	1.32187	1.05364	0.641981	1.57737	2.97416	3.22319
EVM0000846	130.274	135.401	125.494	121.521	123.092	120.558	166.28	182.736	167.278	92.159	92.7874	93.7507
EVM0000847	0.0205045	0.0204467	0.153182	0.0218372	0.0419495	0	0	0	0.0738221	0.246883	0.0323515	0.0301682
EVM0000848	128.231	124.877	128.408	139.507	121.962	115.095	161.734	154.023	136.72	107.174	106.11	99.4511
EVM0000849	1.45199	1.82892	1.40348	2.11606	1.48528	1.85253	1.39531	1.31705	1.35275	2.27842	3.53684	4.75983
EVM0000850	342.048	334.277	334.307	313.88	259.707	276.556	485.808	503.644	379.254	181.035	186.413	182.402
EVM0000851	7.30052	7.64393	8.18091	5.83125	6.90783	5.19381	4.20934	3.77458	5.09251	19.7778	15.838	20.6768
EVM0000852	53.1323	54.5981	44.6764	55.9518	54.0125	55.0242	43.719	43.1211	48.4776	99.4095	94.264	88.1457
EVM0000853	40.6274	44.717	35.3143	42.1794	44.1728	42.5508	19.1525	31.3762	31.7378	35.1605	29.0268	33.2709
EVM0000854	114.356	113.467	114.996	110.844	119.73	119.859	135.567	129.65	142.767	75.4147	74.5016	77.8814
EVM0000855	7.36804	8.10733	6.35324	6.58419	6.35302	7.23014	8.65388	10.7644	9.96034	9.85715	6.19115	5.69026
EVM0000856	3.53549	3.72535	3.29485	3.57472	3.98261	4.24678	3.20492	2.17393	2.81501	10.8699	9.04481	9.9823
EVM0000857	0.566849	0.508726	0.635207	0.060369	0.811786	0.298721	0.544723	0.0732695	0.357143	0.780012	1.07323	0.250201
EVM0000858	1.29659	0.461762	0.951335	0.591796	0.915792	1.43164	1.21631	1.03748	0.916945	0.955804	0.487077	0.726729
EVM0000859	46.5674	38.6793	43.7804	50.3776	54.6246	55.285	55.0533	52.1753	67.0812	41.4054	52.4095	33.2519
EVM0000860	16.5806	16.0723	18.5094	18.2857	18.3814	15.3465	13.1431	15.1218	13.3708	23.9594	24.1686	33.3728
EVM0000861	5.46039	3.63	1.27476	4.84606	3.95647	2.87754	1.53045	1.76449	2.25259	6.6528	12.9229	9.37282
EVM0000862	19.0753	15.742	15.9703	19.7897	19.8492	18.3716	15.0123	12.5407	14.2089	3.39421	9.08085	7.98413
EVM0000863	0.995276	0.413529	0.251717	0.552064	0.275735	0.633766	1.7136	1.25967	1.1571	0.0356653	0.0654301	0.122029
EVM0000864	1.21899	1.67138	2.13435	1.78504	1.24694	0.481791	1.90353	1.18172	1.50861	2.35882	2.4041	3.1386
EVM0000865	45.3613	43.9275	60.9823	53.1912	53.2217	54.2092	77.571	74.0221	74.8521	35.6331	33.7186	39.3258
EVM0000866	1.1386	1.45626	1.01703	1.2126	1.56982	0.808729	0.975225	1.08779	0.757475	0.681202	0.468639	0.47343
EVM0000867	3.74553	3.77961	3.56736	4.17968	3.11398	4.29369	4.73219	4.55205	6.35298	1.69405	1.2243	1.80034
EVM0000868	18.5626	16.7783	14.9014	16.3008	14.1024	14.5303	11.2662	13.0491	14.7536	29.875	28.0887	22.6794
EVM0000869	1.27208	1.91098	1.57359	1.67146	1.52095	2.36806	2.55599	2.45572	3.33081	0.170498	0.208526	0.14584
EVM0000870	0.728451	0.581118	0.272099	0	0.149031	0.153553	0	0.188315	0.393394	0.250596	0	0
EVM0000871	2518.4	2452.68	2623.52	2596.12	2803.15	2672.1	2739.05	2685.67	2787.12	1794.05	1851.96	1803.84
EVM0000872	71.5324	66.7394	83.6906	59.7193	72.3317	71.0602	73.481	53.5636	78.1491	80.3296	81.7276	87.8254
EVM0000873	1.13722	1.92518	1.13606	1.71811	2.13722	2.0627	0.813269	1.94852	1.1664	1.8651	2.08636	3.69657
EVM0000874	43.2281	46.9253	49.2909	44.2607	46.4303	40.6453	37.3502	40.9263	41.7411	32.1552	35.4781	29.9037
EVM0000875	0.692028	0.690077	0.923193	0.315859	0.707897	0.937771	0.950024	0.638927	0.978802	2.55071	1.55981	1.8909
EVM0000876	12.5603	11.8496	13.8302	14.2374	12.7589	13.4914	13.0356	12.9881	12.0916	11.4597	12.7864	12.4699
EVM0000877	150.471	142.689	145.086	140.307	140.621	144.26	158.777	145.443	144.993	213.69	209.481	203.765
EVM0000878	1.16225	0.96581	1.39687	1.12318	0.759575	0.793966	0.496392	0.612045	0.561798	2.70254	2.73367	2.43835
EVM0000879	32.2932	33.1367	34.4591	32.7286	36.5488	36.2997	31.408	34.4227	35.744	20.4856	19.2223	18.0399
EVM0000880	5.64372	4.66305	3.76448	8.41474	4.94841	4.92861	5.42344	5.62752	8.56301	4.99245	6.8692	0.948981
EVM0000881	1.55333	0.83405	0.44632	0.763516	0.488907	0.251871	0.918584	0.772228	0.537733	0.411049	0.56557	0.879002
EVM0000882	0.245247	0.0407593	0.0763395	0	0.0418118	0	0	0.0528333	0.14716	0	0	0
EVM0000883	2.08784	1.85688	2.16046	1.98315	2.13572	3.33052	3.03663	1.45875	2.08236	3.68827	3.38317	3.65299
EVM0000884	3.86125	2.68998	3.63867	3.13579	4.02194	3.51216	3.89691	4.69469	3.72931	2.39582	1.86382	2.25685
EVM0000885	122.851	133.283	139.587	106.269	130.118	131.983	162.517	158.284	170.49	56.4557	56.361	59.7331
EVM0000886	14.2146	13.5777	14.9158	14.3616	10.2741	12.5571	21.3524	21.4438	20.7232	8.52534	5.90197	5.83388
EVM0000887	1.852	2.15458	2.15073	2.71833	2.90243	2.22723	1.85957	1.48849	2.19052	0.326724	0.168579	0.262004
EVM0000888	54.4297	60.7373	50.4211	50.0783	48.0616	46.6047	42.6197	49.5885	39.0492	78.502	88.0599	86.9114
EVM0000889	38.0581	41.0301	40.0601	38.665	37.9917	32.2832	22.6974	29.6668	18.0289	45.5077	46.7471	36.2246
EVM0000890	0.697564	0.735346	0.781686	1.01884	1.10092	1.13433	0.497964	0.901654	0.28702	1.33698	0.849033	1.02632
EVM0000891	11.6409	12.1927	11.6742	13.7671	13.4265	12.6479	9.42357	8.92291	10.401	6.99423	6.31122	5.98269
EVM0000892	0	0	0	0	0.144797	0	0	0	0	0.243477	0	0
EVM0000893	0	0.162371	0.760276	0	0	0	0.625898	0.63141	0.146559	0	0	0
EVM0000894	64.8234	71.3148	63.0802	56.6284	63.6473	71.3266	76.1096	69.6907	63.9236	103.186	90.1521	96.6509
EVM0000895	14.6419	11.9856	22.6522	13.4988	11.6244	13.3591	28.1407	24.2927	20.0631	8.26966	4.82719	20.2564
EVM0000896	51.8574	50.6984	59.4917	52.0728	55.875	55.4889	46.0104	45.586	58.3061	46.4916	44.827	48.9417
EVM0000898	1.37989	0.897391	1.3446	0.92647	1.38085	1.20143	1.03776	0.736709	0.971999	0.361184	0.520624	0.66203
EVM0000899	146.189	142.303	147.989	144.184	133.574	128.722	162.672	166.741	142.523	142.118	139.826	155.633
EVM0000900	4.90559	4.66637	4.28391	4.58251	4.36727	4.30568	3.25	4.01442	3.02144	10.641	11.8344	10.4815
EVM0000901	3.82	3.47799	4.96308	5.30644	4.07749	3.32596	3.83049	5.36699	5.68061	0.285679	0	0.244363
EVM0000902	184.572	178.531	159.04	154.696	140.62	133.81	180.343	198.306	141.551	151.555	160.634	143.718
EVM0000903	43.3282	43.3683	45.4902	42.6191	37.9663	36.6591	47.3206	47.8163	40.5491	38.0569	40.281	38.5006
EVM0000904	29.4779	31.6375	31.3276	35.7564	34.1251	33.5239	27.5298	30.4543	36.6776	25.6513	19.3473	21.0354
EVM0000905	31.6239	31.9625	33.5374	40.2715	36.6121	35.2039	29.0939	24.9535	26.2021	36.0525	40.3224	36.6093
EVM0000906	4.52964	6.24834	4.65289	5.30644	4.55628	6.44505	3.04698	3.7081	3.60135	6.62256	6.07473	6.66444
EVM0000907	12.7817	13.1481	12.7316	13.278	11.2397	12.7625	14.6531	13.8547	13.119	35.5621	29.4361	29.891
EVM0000908	1.75558	1.05959	1.20798	1.30385	0.708882	1.29036	0.532753	1.16446	1.06036	2.6621	3.2437	5.03
EVM0000909	65.3811	62.6079	69.0871	74.6316	65.0098	63.7463	72.7438	71.1448	69.3939	64.4234	61.5164	62.2809
EVM0000910	111.202	107.868	112.67	113.502	103.605	113.415	180.394	170.883	163.001	78.0895	75.9885	79.0873
EVM0000912	0	0	0	0	0	0	0	0	0	0	0	0
EVM0000913	24.3103	23.6741	26.1725	14.7995	27.4367	26.2929	27.9629	37.4391	55.908	46.1349	43.1638	41.7289
EVM0000914	14.0712	15.0283	13.6427	10.0724	14.2366	21.0709	10.4186	10.8334	11.2117	9.91942	10.5547	7.46664
EVM0000915	180.547	175.81	188.881	180.159	161.104	166.114	250.679	227.215	212.317	106.081	101.246	102.273
EVM0000916	0.643747	0.342364	0.761455	0.731292	0.658509	0.271396	0.371172	0.721146	0.656674	1.99311	1.21882	1.64171
EVM0000917	0	0.188203	0	0.201001	0	0	0	0	0.169875	0.162318	0	0
EVM0000918	60.4144	54.3917	58.1117	60.7325	62.5735	64.6316	60.5855	56.7395	57.7537	59.1653	55.6075	59.5996
EVM0000919	0.0709772	0.141554	0.530244	0.151181	0	0.224424	0.0682068	0.366973	0.0638845	0	0	0
EVM0000920	11.3343	12.9809	13.7281	11.3539	14.1197	13.8385	5.93123	3.48129	5.75738	43.817	45.5042	51.8445
EVM0000921	1.8237	1.75361	1.58137	2.15032	2.8649	1.3043	2.12805	1.51538	1.40696	1.23234	1.1304	1.53326
EVM0000922	89.1199	84.2088	90.7762	93.1816	101.67	97.4175	79.2815	74.5527	83.4168	154.189	150.941	157.821
EVM0000923	9.93367	8.56919	10.4543	9.31985	10.0002	9.88814	15.3796	12.1267	13.1986	9.76372	9.82678	6.61171
EVM0000924	139.272	141.524	96.2848	95.9438	95.8538	94.1885	126.113	157.27	95.7699	125.238	146.831	148.509
EVM0000925	166.398	163.079	177.951	158.169	168.246	176.422	208.872	199.831	231.136	50.9551	51.2041	51.0789
EVM0000926	3.23974	4.42713	3.05337	4.6643	3.95843	3.79399	3.45921	2.98561	3.591	7.37847	7.52538	6.09068
EVM0000927	9.88707	10.1772	9.57532	9.9777	11.0191	9.7904	6.7121	7.25561	6.60253	12.6725	11.9261	14.3943
EVM0000928	26.4871	27.4872	30.1755	26.7425	31.8977	33.9453	24.6533	22.3875	30.4679	25.3495	22.4107	22.6411
EVM0000929	0	0	0	0	0	0	0	0	0	0	0	0
EVM0000930	1.13564	0.849326	0	0.302361	1.01647	0.448848	1.36414	0.733947	1.02215	1.46502	1.34383	1.87971
EVM0000931	0	0.354897	0	0	0.121354	0	0.570014	0	0.213557	1.02028	0	0.34909
EVM0000932	2.21628	2.06939	2.4271	3.56194	3.68919	2.97296	2.9236	2.86471	4.00775	2.18331	1.68482	1.36361
EVM0000933	0.218775	1.25441	0.0766118	0.40774	0.13987	0.288228	0.315354	0.0353479	0.123071	0.423345	0.431472	0.321883
EVM0000934	15.0342	13.3964	13.2093	14.9835	13.5604	13.6507	15.3259	15.4937	13.4404	27.0391	22.1178	23.0164
EVM0000935	0	0	0	0	0	0	0	0	0	0	0.067538	0
EVM0000936	0.87519	0.710103	0.507625	0.526823	0.611668	1.00264	0.590287	0.674533	0.39142	0.682563	0.514603	0.639832
EVM0000937	67.6978	68.4449	65.9787	76.0189	73.044	77.6681	76.8837	78.4032	80.6955	130.174	128.056	129.892
EVM0000938	0	0.0495864	0	0.0529585	0	0	0.191142	0.0642753	0.134272	0	0	0
EVM0000939	5.95297	5.9705	4.46652	4.43425	4.54071	3.37287	4.8278	6.62719	3.87146	4.67583	4.99483	6.17657
EVM0000940	14.3643	14.473	18.1644	14.1824	13.4692	14.351	17.5421	17.9867	13.8716	17.5011	20.5388	28.3989
EVM0000941	36.6972	36.0997	38.1352	41.042	43.0771	36.1788	23.1244	26.2098	25.8634	73.2256	72.8633	70.0287
EVM0000942	0	0	0	0	0	0	0	0	0	0	0	0
EVM0000943	1.68458	1.30653	3.28604	1.07644	1.95297	1.73604	0.863372	1.9355	0.876049	0.643905	0.413448	0.771092
EVM0000944	83.9415	98.1602	95.0423	92.7515	83.9642	84.7122	91.0946	79.3644	81.9405	156.46	152.798	167.946
EVM0000945	1182.7	1171.59	1130.5	1188.82	1203.37	1166.19	1114.2	1032.61	903.965	1419.83	1503.1	1505.52
EVM0000946	3.23126	1.61108	4.22441	3.02832	1.91711	3.06509	1.17995	1.75419	2.79203	3.22362	2.75303	3.42298
EVM0000947	453.246	449.719	451.168	455.567	495.773	464.712	320.83	309.73	334.202	1523.61	1575.71	1569.3
EVM0000948	2.49592	2.2738	2.53219	2.72378	2.96292	2.24091	1.83589	1.75249	2.10783	7.57924	7.5843	8.29654
EVM0000949	1.77206	1.66311	1.65479	1.99824	1.70606	2.19729	0.801359	0	0.187644	0	0.32893	0.920194
EVM0000950	11.5646	12.0718	12.7294	12.3162	15.8821	12.5777	4.09059	3.94374	6.09033	73.5571	69.6075	71.0281
EVM0000951	6.14409	6.37855	7.62383	6.81232	5.51012	5.85473	4.20578	6.96258	6.21191	5.35649	1.19515	3.71497
EVM0000952	0	0	0	0	0	0	0	0	0.196697	0	0	0
EVM0000953	16.0409	13.4477	16.5701	10.7338	15.5374	16.757	13.9142	13.945	16.2267	18.0686	17.0219	16.082
EVM0000954	0.17517	0.226432	0.333215	0.317834	0.524286	0.314544	0.268085	0.360594	0.192702	0.122753	0.0511811	0.133636
EVM0000955	2.13969	2.35825	2.18506	2.51863	2.86714	3.21791	3.46303	4.31839	3.29989	3.93867	5.76478	4.49205
EVM0000956	9.76463	9.76342	10.2768	9.86526	10.0965	11.9327	11.8435	8.86917	9.07391	11.5301	9.11892	10.1343
EVM0000957	26.7144	24.6698	27.4388	27.2854	33.5514	28.55	23.1327	22.9398	27.9363	28.5985	24.1696	23.3237
EVM0000958	0	0	0	0	0	0.0714492	0.260578	0.525746	0	0.466415	0.641749	0
EVM0000959	0.159955	0.159504	0.373426	0.170351	0.0818115	0.337176	0.019214	0.0258442	0.0179964	0.0343916	0.0315466	0.088253
EVM0000960	49.0799	48.1561	43.5483	44.6324	41.5551	37.5733	41.2686	43.0788	30.8556	83.7073	87.182	83.8599
EVM0000961	3.43178	3.64528	3.23952	3.02913	3.46277	2.84052	2.21349	2.42283	1.77105	5.72642	5.59113	4.81591
EVM0000962	2.11477	2.48599	2.21566	2.89309	2.2512	2.62757	3.04008	2.40014	2.3677	1.98142	1.73613	3.56678
EVM0000963	86.4959	87.0304	86.7283	91.712	85.5968	82.9969	85.2055	88.3	80.063	103.192	99.2516	105.971
EVM0000964	22.7304	20.683	24.579	21.2093	21.6927	21.507	28.6443	31.0501	29.4795	19.5932	19.3173	21.32
EVM0000965	87.0405	81.7097	81.9887	87.7801	81.0704	80.9882	99.471	92.1964	79.7693	96.3723	97.4251	99.5702
EVM0000966	0	0	0	0	0	0	0	0	0	0	0	0
EVM0000967	0	0	0	0	0	0	0	0	0	0	0	0
EVM0000968	26.512	26.6018	20.1914	21.3356	26.0858	25.2029	20.8972	20.7746	15.7475	42.7632	43.0018	40.464
EVM0000969	0.994135	1.1896	1.55963	1.16462	1.64743	1.38308	0.305706	0.488297	0.930583	1.29958	2.13319	1.66744
EVM0000970	0.195396	0.194845	0	0	0	0.205942	0	0.252564	0.17587	0.336093	1.84975	1.72491
EVM0000971	0	0	0	0	0	0	0	0	0	0	0	0
EVM0000972	63.4487	68.6212	66.1119	64.6269	70.4777	71.224	42.6845	42.6869	45.1442	125.68	123.295	131.919
EVM0000973	0.0847381	0	0.0791308	0.0902456	0	0	0	0	0	0.291509	0	0
EVM0000974	4.03683	3.79542	3.44659	6.26455	4.48335	5.47033	5.2093	3.72707	7.26687	6.7452	10.1907	8.14542
EVM0000975	146.567	160.172	151.627	142.007	165.499	180.866	151.237	159.666	201.474	94.5746	74.152	93.9919
EVM0000976	4.7346	4.04679	7.05303	5.64259	6.45756	4.93072	8.12464	6.99408	7.91417	3.97495	6.4919	4.56107
EVM0000977	0	0	0	0	0	0	0	0	0	0	0	0
EVM0000978	4.93771	4.40157	6.28769	4.67434	4.33667	5.20421	5.22427	4.57725	4.48918	5.06158	5.03635	7.19145
EVM0000979	5.50404	6.54771	6.16177	4.04496	4.97174	6.47959	5.84596	5.15896	5.30167	11.5711	12.3406	12.0761
EVM0000980	8.0998	7.05714	8.90085	7.40636	10.5871	8.53695	7.27259	8.30165	7.43767	8.65481	8.97157	8.24574
EVM0000981	585.24	576.218	576.456	647.815	674.278	677.335	577.803	568.342	584.22	1069.89	986.995	1085.08
EVM0000982	25.7389	24.5683	26.4778	30.6366	32.3834	35.1068	33.1994	37.3613	35.6793	126.425	104.891	106.723
EVM0000983	15.6839	19.2532	16.8667	17.3062	19.287	16.0529	10.1203	7.97729	11.4156	30.3859	31.535	35.0716
EVM0000984	25.9364	25.4618	26.0061	30.6952	29.0366	30.625	27.8904	31.2695	35.183	17.083	16.1464	17.9693
EVM0000985	23.8217	24.8928	25.0567	25.0226	23.906	24.8561	25.3992	25.9269	30.1125	13.723	14.3295	13.8608
EVM0000986	5.16404	5.28866	7.95032	5.64831	7.99507	9.12028	6.97429	6.1337	4.89925	6.24173	2.20208	4.51763
EVM0000987	0.495781	1.07116	0.925948	1.49601	1.0143	1.39344	2.30274	0.74764	1.18997	0.852774	0.260744	0.607867
EVM0000988	0	0	0	0	0	0	0	0.217949	0	0	0	0.868294
EVM0000989	2.21449	1.10412	0.775482	2.06362	1.69895	2.04226	0.79802	2.14679	0.747449	1.90453	2.18373	4.47998
EVM0000990	28.2283	31.2764	30.4712	31.5866	31.1553	27.548	16.5244	16.2165	12.8028	46.0463	50.6152	53.6761
EVM0000991	7.83124	7.79251	8.59163	6.86423	6.72977	7.09237	9.72386	10.5541	10.836	4.30817	2.60818	3.61139
EVM0000992	1.24011	2.16408	1.03398	1.98107	2.08405	2.61409	1.65988	1.77468	0.877007	3.12343	3.56384	4.10529
EVM0000993	15.3145	11.9016	10.6083	13.783	17.9456	14.2465	15.8913	16.9141	17.214	18.0559	23.3687	19.3586
EVM0000994	17.9132	15.7052	17.3518	16.536	18.5843	17.5721	12.8111	15.3401	12.3716	8.48281	8.0823	9.31574
EVM0000995	36.133	33.969	33.3505	32.4993	36.6185	34.4898	27.8479	24.2734	22.0085	34.0316	35.6696	39.0185
EVM0000996	2.56905	2.42697	3.40917	3.09602	2.62796	3.77653	1.36432	1.9225	1.64297	7.79125	6.08007	4.57558
EVM0000997	8.44186	5.94961	7.05343	6.557	3.96062	3.47871	6.03852	9.02474	4.34187	2.40189	1.80262	1.77435
EVM0000998	57.1492	60.2241	62.4319	62.7597	62.6899	63.5328	56.5191	61.6569	50.5853	28.7984	25.2834	29.8306
EVM0000999	0	0.0228544	0.0642073	0	0	0	0.176196	0	0	0	0.144644	0
EVM0001000	24.5036	24.8742	24.7644	27.0353	29.3826	27.2867	28.3292	26.9503	34.0746	21.0196	15.9017	15.6627
EVM0001001	13.6175	14.9266	14.9338	14.3768	12.7086	14.8226	21.6839	22.2819	16.9564	18.5263	19.8916	17.7578
EVM0001002	32.523	36.3087	38.5925	33.572	32.0187	28.775	39.474	34.9303	35.9476	57.5658	68.4916	67.9557
EVM0001003	226.59	222.994	257.201	249.95	212.571	214.02	165.684	184.011	168.354	331.932	326.311	342.399
EVM0001004	19.1122	16.6836	14.6543	13.5262	17.1145	15.9605	11.0901	13.2596	10.9919	31.1937	36.7059	24.5261
EVM0001005	46.1311	43.768	37.014	38.1587	37.3388	41.7761	41.5329	41.3921	48.3742	15.4074	20.4927	22.5692
EVM0001006	29.4859	29.0026	31.9332	31.2673	30.1836	25.868	31.6434	30.8232	28.8777	26.1217	25.7604	30.7655
EVM0001007	140.551	136.428	142.495	140.252	135.987	133.038	162.065	155.464	160.079	95.8216	84.4011	94.4869
EVM0001008	107.022	100.051	102.156	105.027	107.747	102.929	104.786	107.34	104.257	73.1999	69.8527	70.3007
EVM0001009	3.53433	3.68336	4.21862	3.82064	4.5396	3.72508	3.39637	2.02657	3.06155	1.73693	0.796624	1.44663
EVM0001010	5.86923	5.97721	2.5655	5.85171	4.85415	3.29043	4.80012	2.74402	3.48435	7.51787	5.31976	7.53298
EVM0001011	0.0877219	0.874746	0.57342	0.186846	0.179467	0.832107	0.927276	0.113387	0.552691	0.150887	0.553621	0.645324
EVM0001012	0	0	0	0	0	0	0	0	0	0	0	0
EVM0001013	2.64469	6.96231	5.92725	4.16854	7.89959	7.9163	5.18459	8.75127	7.33167	7.64237	7.01018	7.62661
EVM0001014	16.6087	17.4747	19.4176	22.0057	22.3406	23.2941	20.3589	19.7776	27.6615	31.0423	22.2843	20.0108
EVM0001015	11.8368	16.0675	13.6577	15.1801	13.1859	14.1086	12.804	11.2947	16.2319	8.63433	6.16007	6.65615
EVM0001016	3.24482	5.17708	4.37682	4.14686	4.72068	4.71193	6.85997	8.20194	5.45173	0.744172	0.91015	1.48527
EVM0001017	1.91051	1.77811	2.28363	1.95329	1.92826	3.03385	2.42343	2.86459	2.70549	1.48974	0.723444	1.38672
EVM0001018	92.5686	96.2261	94.186	91.3796	84.9997	82.0164	96.4223	104.907	78.8427	93.3379	99.3814	103.265
EVM0001019	78.1482	74.5806	70.0383	72.0559	60.2681	59.812	94.6535	94.3234	58.4741	63.3907	57.1539	59.6245
EVM0001020	0.0245872	0.0367769	0.0114801	0.0261852	0.0503021	0.0518285	0.0472551	0.0158904	0.0331954	0	0.0387931	0.0361751
EVM0001021	123.007	123.171	125.552	123.999	116.656	116.73	132.607	127.483	135.002	68.0783	66.7581	61.2477
EVM0001022	18.2737	19.0939	17.0256	16.0479	18.6927	20.9271	18.2405	23.3511	23.9783	12.0286	11.756	10.6564
EVM0001023	0.178844	0	0.300618	0	0.109767	0.113098	0.137491	0.508573	0.35414	0.0615246	0	0
EVM0001024	0.0509599	0.139745	0.0594847	0.257792	0.0521284	0	0.31831	0.164674	0.160536	0.0876541	0.0201008	0.112466
EVM0001025	50.0641	52.2292	54.1514	50.384	53.23	49.6116	57.3267	51.2153	57.2755	26.3254	26.2405	22.2679
EVM0001026	0.46785	0.699797	0.0728152	0.166086	0.319052	0.4931	0.224794	0.201577	0.491281	0	0.492108	0.114724
EVM0001027	0	0	0	0	0	0	0.348861	0	0	0	0.572781	0
EVM0001028	2.86038	2.39227	2.71419	3.19369	2.7372	2.38263	1.24136	1.789	2.1593	4.76132	3.27559	4.54786
EVM0001029	2.91036	2.25534	3.14018	2.36327	2.51438	2.26684	4.42889	4.14797	3.57208	5.10876	5.04973	5.18611
EVM0001030	1144.88	1144.42	1215.98	1232.58	1325.24	1251.42	1081.63	1041.29	1037	920.26	978.469	1010.47
EVM0001031	38.9995	36.9632	46.1155	35.7906	51.0509	44.9645	46.6822	53.219	60.7499	29.9756	32.449	24.8113
EVM0001032	120.92	122.153	125.2	121.256	111.854	120.951	122.628	115.402	116.074	61.6602	57.1524	59.1557
EVM0001033	48.0607	50.1167	51.9455	49.5153	45.8275	51.7747	51.4299	46.1491	51.7864	41.3646	41.1261	44.1284
EVM0001034	5.72713	7.2815	5.48185	5.48942	6.15138	4.82898	5.77876	4.25658	2.70628	2.46275	1.12951	3.15986
EVM0001035	23.1509	24.7216	26.1016	24.4614	31.8243	28.1148	21.8969	28.2749	23.7908	15.782	15.5311	14.6618
EVM0001036	31.303	34.8263	34.4014	28.6537	34.4554	30.9202	23.866	24.6781	27.29	66.9255	56.4912	62.0422
EVM0001037	0.924192	1.48255	1.16322	2.22528	1.31532	1.43993	3.35941	3.94733	2.38702	2.69552	2.40915	1.53712
EVM0001038	300.107	305.656	308.12	268.562	369.564	357.727	338.171	312.561	364.252	281.578	282.544	282.106
EVM0001039	1.11789	0.636994	0.149131	1.02047	0.163361	0.84159	0.613861	0	0.574961	1.09877	0.503937	0.704892
EVM0001040	37.2522	38.6677	38.4893	39.0488	30.6915	31.2273	53.4042	50.4254	41.8487	19.2874	20.6899	16.6015
EVM0001041	1444.89	1403.42	1435.23	1443.53	1407.71	1336.75	1301.55	1273.04	1131.68	1096.61	1100.5	1180.95
EVM0001042	0.129755	0.258779	0	0	0	0	0.124691	0	0.116789	0.446374	0.204725	0
EVM0001043	7.22668	6.44774	6.74847	4.86086	4.4095	6.81495	3.53322	3.11367	5.47749	3.70729	3.20058	7.46146
EVM0001044	0.332174	0.331237	1.39587	0.176881	1.69895	0.350101	2.23446	1.0734	0.896939	5.71358	3.93071	1.71054
EVM0001045	0.0306622	0	0.143166	0	0	0.161585	0	0.0396331	0.0551962	0	0	0.135339
EVM0001046	21.0954	21.3935	20.0506	19.1039	22.6527	22.9068	19.9526	17.1382	19.5305	24.4911	23.1275	22.7634
EVM0001047	951.792	853.673	902.323	966.718	925.172	868.84	806.079	825.134	697.422	1073.42	1182.59	1184.07
EVM0001048	43.6535	41.6902	40.8836	43.2377	47.8441	47.0826	43.1726	46.2671	50.1163	56.5886	49.3974	60.9034
EVM0001049	15.5443	15.9787	16.3179	17.302	15.8649	15.8285	14.5442	16.8266	17.065	12.4532	12.1428	10.1875
EVM0001050	111.55	108.706	128.138	123.045	103.667	123.936	127.451	135.131	163.895	39.5796	36.8772	36.8765
EVM0001051	5.39493	4.57276	4.01235	3.36526	3.7645	3.71627	7.88762	6.77411	6.4513	2.85016	2.31039	3.23171
EVM0001052	131.544	127.63	141.285	126.129	116.605	109.89	152.83	144.991	124.148	89.8507	103.707	94.7165
EVM0001053	48.8328	50.2908	53.5366	54.8861	56.2178	56.7024	58.5391	54.2761	55.2765	39.2928	38.3059	49.1161
EVM0001054	6.41325	3.93549	5.68175	6.12955	8.9153	7.10602	1.58024	2.97576	3.70024	10.1826	4.67015	3.14526
EVM0001055	11.9911	12.2966	12.6931	11.5978	12.7575	13.1024	10.1187	9.65152	11.5496	14.2553	15.287	12.1936
EVM0001056	19.7331	19.5135	23.3412	21.7161	21.0266	23.9178	21.8073	21.6805	18.6492	25.4566	16.605	23.2266
EVM0001057	23.4317	27.6628	23.3064	25.4805	24.9333	25.6426	24.8896	29.649	22.1407	28.7223	27.7629	30.1821
EVM0001058	40.7802	42.3412	43.0669	42.0093	42.3727	47.3053	41.1835	37.3772	38.5737	47.6132	48.12	43.1998
EVM0001059	740.311	732.794	713.698	804.955	722.473	709.816	684.335	728.327	701.499	664.321	643.305	675.603
EVM0001060	12.8376	10.2411	11.6884	11.5357	9.60278	10.2324	10.1005	12.1341	11.5548	0.276019	0.506372	1.1805
EVM0001061	26.3349	30.4553	30.3185	32.1794	31.5145	29.7857	23.2005	23.893	29.5158	29.4511	31.3616	31.4679
EVM0001062	4.05945	4.76765	7.10429	4.13114	5.44444	4.9124	6.64615	5.67469	4.84466	4.13778	4.22249	4.15874
EVM0001063	0.00690016	0.0068807	0.00322178	0.00367431	0.0141168	0.00363628	0.0165771	0.0133784	0.00621063	0.0237374	0	0
EVM0001064	122.099	121.347	117.502	124.372	119.435	121.437	126.882	124.423	118.321	214.487	199.705	195.006
EVM0001065	2.12733	2.88368	3.01088	3.36299	4.62423	2.76764	4.47189	4.38238	4.72703	0.57174	0.157333	0.0978103
EVM0001066	74.1363	73.5266	79.0491	78.7407	84.6736	72.1378	61.7178	69.5111	64.0154	50.4546	58.7493	56.6567
EVM0001067	61.5813	59.9355	59.2813	58.3905	60.1996	61.4039	60.2594	62.4956	73.5324	33.5197	29.4075	29.8937
EVM0001068	2.6363	2.62887	10.5859	1.96535	1.88773	2.36179	2.28006	1.87419	2.01693	1.13365	1.45582	0.775755
EVM0001069	0.148646	0.118581	0.166571	0.0633227	0.0304109	0	0.0571375	0.0384271	0	0.153408	0.187623	0.0437403
EVM0001070	0	0	0.378284	0.215709	0	0.426953	0	0	0.364609	0	0.31957	0
EVM0001071	145.882	147.962	143.12	140.351	136.906	136.448	161.63	159.423	159.538	80.8845	78.5686	80.2572
EVM0001072	0	0	0	0	0	0	0	0	0	0	0	0
EVM0001073	177.249	167.716	177.001	182.682	160.352	157.773	211.838	203.109	178.66	161.668	150.592	156.614
EVM0001074	2.5483	0.735587	2.25443	0.999867	2.67534	2.96856	3.35104	3.46723	3.92335	0.807438	0.105806	0.887994
EVM0001075	98.4849	95.139	92.285	88.0037	84.0287	87.5179	103.287	107.248	88.0704	72.235	78.4133	73.4649
EVM0001076	2.62871	3.69365	3.45898	4.32659	2.44454	5.41524	7.11903	8.49451	5.48488	0.616574	0	0.1758
EVM0001077	7.87573	8.81518	9.0056	10.8411	9.81008	8.47019	11.8931	9.07194	10.8018	13.2703	11.3272	11.4299
EVM0001078	0	0	0	0	0	0	0	0	0	0	0	0
EVM0001079	0	0.480054	0	0	0	0	0	0.622259	0.216652	0.414028	0.759558	1.4166
EVM0001080	15.8779	16.7606	15.6337	14.292	14.543	16.1047	10.5977	7.64259	8.13225	27.4252	30.2927	31.8649
EVM0001081	2.35341	1.35673	3.05614	1.60564	2.44499	2.13161	1.23678	0.570366	1.62177	4.048	3.07495	1.83948
EVM0001082	142.428	129.138	128.288	132.103	98.0715	110.888	207.851	185.002	172.871	123.612	125.061	141.712
EVM0001083	19.189	19.7872	23.3663	18.8686	22.4173	18.3861	23.4167	22.7598	25.8581	14.9091	15.9981	19.41
EVM0001084	12.8291	12.9699	14.2669	13.1149	13.1415	14.625	9.4978	9.88535	7.57032	22.0364	21.2214	25.1412
EVM0001085	222.089	214.115	219.651	213.934	226.121	215.226	210.017	201.626	204.5	197.002	178.109	191.771
EVM0001086	22.604	16.1579	18.9142	19.8452	18.9785	20.4937	33.7893	32.6732	38.5757	14.9111	13.1663	13.5889
EVM0001087	0.0954522	0.571098	0	0.101656	0.195282	0	0	0	0	0	0	0
EVM0001088	2.06252	2.70619	2.12877	2.08096	2.3319	3.20354	0.938847	1.68376	1.36788	2.80078	0.171273	2.07628
EVM0001089	0	0	0	0	0	0	0.0298697	0	0	0	0	0
EVM0001090	0.650548	0.58974	0.635113	0.913274	0.635217	0.934988	0.8809	0.343997	0.798462	0.0508628	0.0466553	0.217534
EVM0001091	1.1308	2.67809	1.35297	1.2043	1.04829	1.19183	1.15458	1.37029	1.62212	2.30975	1.39387	2.18367
EVM0001092	88.8718	81.6988	88.4116	92.6545	80.9002	79.859	112.269	100.51	111.574	64.2676	53.6805	59.6789
EVM0001093	474.766	484.553	490.533	478.972	469.478	495.417	557.848	552.274	597.299	267.804	276.08	286.997
EVM0001094	18.8857	21.0763	19.5121	24.3069	23.5935	24.5636	22.0099	25.8654	24.7382	14.6526	15.8496	13.3611
EVM0001095	0.264189	0.579577	1.38156	0.168816	0.324296	0.278447	0.0507754	0.273187	0.332904	0.181768	0.250098	0.15548
EVM0001096	3.35367	5.45995	6.32742	5.90414	3.99067	3.31827	5.13013	6.63501	6.89953	9.8889	9.93476	10.6741
EVM0001097	1.88214	1.45303	1.47411	1.85359	1.44915	1.27982	3.28673	4.13315	2.49555	6.61402	5.68372	6.55075
EVM0001098	3.57866	3.52936	3.70909	2.97362	5.71234	3.64746	2.41862	3.04991	3.32724	19.6841	23.7022	20.4825
EVM0001099	5821.41	5707.93	5590.8	5325.36	5024.69	4823.66	5180.08	5018.34	4072.61	4101.16	4392.85	4510.29
EVM0001100	3.69857	3.20103	2.67183	2.37824	3.64061	2.35362	2.74948	1.53342	1.57027	9.60266	9.24873	8.1112
EVM0001101	0	0	0.867672	0	0.118808	0.122413	0	0	0	0.399551	0	0.341766
EVM0001102	1.91325	2.96327	3.42124	2.08096	2.58174	2.57427	2.42535	2.47302	1.68542	6.02167	6.61541	6.46842
EVM0001103	23.9499	24.9708	24.6735	26.0535	26.1411	26.9682	21.6576	25.1889	20.4296	31.1449	31.7091	29.1913
EVM0001104	0.45409	0.315595	0.462591	0.366366	0.380047	0.319065	0.171902	0.480228	0.346787	0.402365	0.108553	0.242945
EVM0001105	0.81682	0.991586	0.630114	0.567331	0.581253	1.16035	0.511916	0.459044	0.639301	1.03846	0.896527	0.209006
EVM0001106	16.6668	17.5006	17.8757	18.4927	18.2854	17.5173	11.6269	9.5096	10.8691	36.7045	36.7306	37.2102
EVM0001107	161.283	160.691	166.889	168.403	174.529	142.645	132.036	134.663	126.51	210.836	227.18	248.2
EVM0001108	130.908	135.306	135.638	146.147	146.723	156.77	173.79	151.058	178.416	178.405	180.979	171.91
EVM0001109	1.47414	1.38599	1.65191	1.12139	1.24944	1.33175	1.29518	1.79656	2.19875	0.724461	0.730986	1.30134
EVM0001110	284.892	261.16	277.829	266.038	244.63	232.929	320.592	288.514	266.317	216.076	217.136	228.19
EVM0001111	5.02123	4.46785	2.81338	3.20854	4.58322	3.41959	3.04361	1.49776	2.15543	1.46161	2.19388	1.93217
EVM0001112	11.6825	17.4162	16.8551	12.9395	11.7114	12.744	10.3284	9.89086	12.9862	13.7648	11.7046	11.86
EVM0001113	2.3012	2.89334	1.96206	1.59833	4.6056	3.26902	2.49982	2.0692	2.07124	3.95821	7.73513	7.21312
EVM0001114	3.10443	1.39305	3.04395	2.47964	2.22293	2.45398	4.62404	1.60508	0.977971	29.1019	21.0618	24.893
EVM0001115	3.25063	1.97527	2.70351	1.46049	3.53299	2.46249	1.7083	1.31302	2.56007	1.57255	3.12534	1.79349
EVM0001116	0	0	0	0	0	0	0	0	0	0	0	0
EVM0001117	99.9382	98.4438	95.4962	84.7583	85.216	78.9424	105.335	101.599	74.2244	84.8424	83.7498	84.6235
EVM0001118	47.8104	44.2185	52.4015	45.1648	50.8036	45.8871	48.7334	51.0645	54.8613	44.9321	42.4873	54.4478
EVM0001119	104.727	106.563	102.639	101.192	94.6399	92.3115	95.098	92.696	86.54	45.6492	47.5999	44.9424
EVM0001120	1.17238	1.65619	0.881921	1.0058	0.899446	0.892415	1.12662	1.34701	1.23109	0.672186	0.924873	1.05411
EVM0001121	1.23109	1.79365	1.80361	1.18549	1.28194	1.60832	2.64944	2.50602	2.3024	2.62475	2.3611	2.54883
EVM0001122	24.7199	26.1908	25.2482	30.44	30.6207	31.7534	33.5911	44.4337	36.1557	36.8726	30.1659	30.4033
EVM0001123	0.412638	0.411475	0.626165	0.659185	0.21105	0.815453	0.84263	1.33341	0.974934	0.266161	0.488287	0.75889
EVM0001124	1.50441	2.34026	1.40486	0.833137	1.78513	2.02957	1.15655	1.63343	0.758282	7.03847	3.70284	6.55175
EVM0001125	3.49656	4.45014	4.76889	3.62582	5.03568	3.97622	2.34322	2.49766	2.89869	11.4747	13.5016	12.252
EVM0001126	0	0	0	0	0	0	0	0	0	0	0	0
EVM0001127	11.5026	11.5821	12.0514	10.7563	11.1924	10.4084	13.0487	13.5625	14.1914	8.49317	9.56119	10.1543
EVM0001128	230.656	201.567	222.72	217.963	170.293	177.759	344.54	335.246	261.88	621.603	651.236	704.239
EVM0001129	101.128	101.956	99.0644	97.9749	99.4452	97.7703	94.6438	90.5408	85.8918	112.373	114.854	114.377
EVM0001130	0.819933	0.946719	0.596421	0.661811	0.785762	0.700445	0.464463	0.769767	0.567093	0.979811	1.22558	1.28255
EVM0001131	1.25445	1.06785	0.928578	1.04271	1.18932	0.983551	0.882061	1.04802	0.991397	1.10518	1.52063	0.900323
EVM0001132	11.0253	13.4609	9.17379	13.3225	11.495	10.8755	7.06332	6.57741	6.23404	37.6853	36.4636	34.2108
EVM0001133	0.428304	0	0.106657	0.152047	0.0876251	0.120379	0.0823172	0	0.0771008	0.0491139	0.450511	0.0840216
EVM0001134	9.87283	10.1904	9.48909	9.10027	10.3355	12.7789	12.9828	11.7912	13.875	6.85233	7.28753	7.73013
EVM0001135	14.9074	14.9569	14.6753	17.0494	16.4136	17.3567	17.9599	16.8722	20.6058	12.0945	9.52987	11.0476
EVM0001136	13.4875	12.6915	13.1084	14.6396	14.839	15.5108	17.903	15.5313	17.3507	12.9905	11.4311	12.3728
EVM0001137	19.0419	17.9592	16.5037	17.0866	15.8228	14.1735	24.3947	23.4617	19.3975	50.2788	52.5123	50.9981
EVM0001138	6.67227	5.26533	7.66517	8.6907	5.10668	7.53831	8.90276	5.39801	8.03616	13.2932	9.39129	10.5938
EVM0001140	2.76811	2.13076	2.40354	2.43083	2.23546	2.6104	1.35337	1.82038	2.44779	6.18136	7.73883	7.35946
EVM0001141	5.81304	4.69253	5.16988	5.69951	4.62493	3.20926	6.38416	4.65139	7.05924	8.09424	3.78513	7.73815
EVM0001142	18.1408	16.623	16.0819	13.9025	24.011	20.4118	12.4856	12.1203	15.5006	20.8725	24.851	23.1739
EVM0001143	0.51595	0.563495	0.780071	0.300908	0.66601	0.647377	0.661081	0.571632	0.773986	0.781814	0.96911	1.31941
EVM0001144	22.4925	24.36	23.3688	23.7957	27.1223	25.3549	23.547	20.6978	21.3844	29.3366	30.3176	24.4363
EVM0001145	65.9414	63.4598	71.7129	56.3919	68.2945	66.9005	77.9057	100.113	99.4625	22.9109	30.356	28.5493
EVM0001146	8.87578	7.94087	7.2298	9.30541	6.1943	6.84854	4.54366	6.14732	5.05213	4.37555	5.93315	5.24797
EVM0001147	0	0	0	0.280764	0.269675	0	0	0.681522	0	0	0	1.16363
EVM0001148	1.03804	1.07652	1.202	0.928627	0.764529	0.919016	0.39901	0.858718	1.30804	1.4284	0.655118	0.794179
EVM0001149	6.19907	4.578	4.23871	6.71247	5.81058	5.7682	4.31205	6.30293	5.46288	2.67685	3.35573	2.06074
EVM0001150	156.957	156.045	138.806	141.459	130.611	135.252	175.441	176.647	148.834	142.655	140.829	146.712
EVM0001151	412.403	410.338	387.867	402.046	340.466	331.867	371.593	386.625	304.364	308.861	321.769	305.909
EVM0001152	2939.26	2908.03	3046.84	2935.08	2852.49	2698.06	2916.31	2698.56	2493.55	2256.24	2210.52	2347.28
EVM0001153	88.3513	86.907	95.776	108.499	107.192	106.835	119.127	111.545	127.76	83.3477	82.3963	78.0953
EVM0001154	0	0	0	0	0	0	0	0	0	0	0	0
EVM0001155	27.6904	27.7789	25.6111	24.4491	24.936	25.3405	34.4894	35.9719	30.7751	19.181	14.7388	18.8239
EVM0001156	62.0492	58.3046	58.629	54.7099	50.4678	53.6116	71.9467	75.7937	56.3444	56.7324	60.8494	57.4856
EVM0001157	0.714352	1.33563	0.250155	0.76078	0.639391	0.752906	0.772277	0.577095	0.642967	3.68618	5.49454	5.64924
EVM0001158	0	0	0	0	0	0	0	0	0	0	0	0
EVM0001159	230.041	237.853	221.069	228.958	262.348	255.705	164.059	172.74	212.374	226.789	201.144	210.053
EVM0001160	379.39	377.137	364.544	334.541	344.19	328.775	369.251	371.282	320.707	257.622	278.982	280.17
EVM0001161	202.626	213.317	188.349	207.305	199.661	181.212	172.245	166.248	165.754	270.138	232.488	238.302
EVM0001162	160.646	154.054	162.851	150.959	158.911	131.59	125.482	136.025	126.293	187.415	175.527	192.541
EVM0001163	16.1178	19.4581	20.896	21.8705	19.5003	19.6177	14.7024	14.594	12.482	25.8237	30.1419	26.0012
EVM0001164	16.2396	19.1381	18.2669	15.1987	20.2616	23.3401	19.6254	20.8319	17.4958	30.2608	36.4925	38.012
EVM0001165	0	0	0	0	0	0	0	0	0	0	0	0
EVM0001166	61.214	64.1021	59.8822	60.3046	57.6147	60.6177	67.6732	66.2021	61.1643	43.8387	40.2349	41.1914
EVM0001167	4.15217	4.36796	3.15306	6.12281	3.82731	3.84727	6.13861	5.42597	4.02473	19.7778	23.1811	20.0055
EVM0001168	2.89759	3.58038	3.99996	3.75677	4.18832	3.58511	0.847455	1.13989	2.15447	19.2861	22.4612	24.1891
EVM0001169	3.55607	4.03798	4.91394	3.15234	3.95301	4.52792	5.92589	4.80903	5.49486	4.70239	4.57286	3.87109
EVM0001170	95.7881	92.7587	86.5977	87.638	92.2371	85.4861	63.447	64.4038	56.6016	122.417	130.607	134.428
EVM0001171	4.14067	3.85373	4.72593	4.50778	4.09443	5.0915	2.25479	2.73553	2.73306	2.4532	1.45179	2.91069
EVM0001172	121.124	132.495	114.823	124.696	113.295	112.864	101.759	117.896	86.3903	208.972	229.038	194.95
EVM0001173	5.17174	4.12573	4.9399	4.50072	6.01587	5.48201	3.43631	5.00409	4.52193	8.79404	8.48623	7.65264
EVM0001174	107.618	109.184	103.195	109.373	104.094	128.736	114.299	113.161	119.287	133.392	117.552	119.96
EVM0001175	41.9343	45.7354	48.1184	39.3533	43.0542	40.577	41.7548	44.0426	37.716	31.1408	28.8578	30.0065
EVM0001176	0.471582	0.429945	0.226479	0.54528	0.344569	0.482833	0.569706	0.539892	0.691259	0.301284	0.361396	0.416302
EVM0001177	8.93272	11.2212	11.8083	8.772	10.5616	9.96505	8.08239	6.29793	10.5461	11.6733	7.13843	10.4117
EVM0001178	0.885796	0	0.827181	0.471683	1.13264	0.700202	0	0	0.597959	0	0	0.651634
EVM0001179	4.93227	7.02624	4.4179	6.43205	7.92845	7.21421	11.3174	8.58718	12.5934	4.32847	2.38225	1.92528
EVM0001180	0.903874	0.563328	0.316523	0.721965	0.9246	0.59541	0.325722	0.730202	0.203388	0.19434	0	0.831166
EVM0001181	234.445	224.076	216.735	236.198	214.826	229.675	287.313	277.481	286.472	115.808	108.451	113.403
EVM0001182	2547.91	2462.2	2513.36	2438.97	2432.06	2365.4	2411.59	2327.31	2123.46	2215.15	2265.91	2313.41
EVM0001183	9.58511	8.9813	10.5712	7.74406	10.9037	9.84115	6.98764	11.001	11.5278	7.95922	7.56157	8.02385
EVM0001184	212.974	193.391	214.391	210.489	236.939	202.655	163.164	150.111	168.809	159.761	181.619	187.407
EVM0001185	130.555	128.178	127.764	133.444	123.55	116.767	155.601	143.131	160.248	88.6074	84.8432	95.8623
EVM0001186	0.48849	0.422165	0.638632	0.763017	0.83282	0.549178	0.688488	0.715598	0.732793	0.224062	0	0.239571
EVM0001187	60.3858	57.3696	61.2538	61.8283	55.2018	55.8491	81.4323	76.2087	68.0304	53.2222	51.709	51.3687
EVM0001188	87.8442	81.3833	80.3334	87.3311	82.628	80.7429	80.6854	73.0122	72.1523	101.692	104.916	111.481
EVM0001189	0.416954	0.531273	0.346101	0.592071	0.142172	0.537115	0.378419	0.239531	0.479535	0.557812	0.365477	0.374894
EVM0001190	0.071899	0	0	0	0	0	0	0	0.0647142	0.123671	0	0
EVM0001191	1.7456	1.66433	1.32981	1.7449	1.61333	1.54931	1.19188	1.16774	1.08879	0.711125	0.31407	0.58575
EVM0001192	1.2104	1.46829	1.64302	2.2459	1.96573	2.11744	3.09375	2.54841	3.4705	2.27513	1.33878	1.30351
EVM0001193	34.3521	29.8319	28.6109	29.0041	29.0194	30.7698	24.8824	24.0014	21.6342	65.2981	58.1062	59.8006
EVM0001194	5.65163	6.15358	6.16201	4.52235	5.28123	5.47369	7.42731	5.9231	4.42695	7.67183	6.1214	9.34901
EVM0001195	19.5879	20.8427	20.3728	24.0589	24.3805	26.6037	14.5402	14.7365	17.2293	43.7799	53.0387	45.8698
EVM0001196	1.69586	1.77161	1.16888	0.860039	0.908678	1.70228	0.931239	1.98326	0.872226	0.625068	1.33784	0.653482
EVM0001197	52.3992	46.1866	53.7376	44.8431	56.7115	47.0911	40.9126	32.0507	42.1098	62.769	67.9109	53.3468
EVM0001198	4.23358	6.81959	4.86577	2.6012	2.99815	4.46207	1.87769	2.31517	3.37085	5.88163	6.67964	8.38499
EVM0001199	23.811	24.2148	24.7713	26.4484	28.1414	25.3865	21.747	18.0087	21.1128	34.3898	34.2152	40.8236
EVM0001200	0	0.0594325	0.0556566	0.126948	0.42677	0	0.0572741	0.154076	0.0536447	0	0.0940361	0.08769
EVM0001201	0	0	0	0	0	0	0	0	0	0	0	0
EVM0001202	0	0	0	0.52539	0	0	0.158024	0	0.296019	1.1314	0	0
EVM0001203	88.2306	95.7408	96.5908	90.0878	87.333	85.4688	113.666	131.576	113.017	74.2848	71.6313	71.2083
EVM0001204	9.53969	11.9765	10.4466	11.4023	10.5307	10.0546	9.89281	10.2017	12.5398	7.6732	7.14675	6.05858
EVM0001205	2.60738	2.70688	1.33416	1.40744	1.82683	2.03285	3.67261	2.53922	4.01854	4.54629	2.42323	2.99541
EVM0001206	0	0.0147086	0	0.0628353	0.0150884	0	0	0.0190657	0.0132762	0	0	0
EVM0001207	30.0227	30.0466	27.7987	30.0408	28.2045	28.869	24.1237	22.3126	27.2349	37.6222	33.9946	39.3651
EVM0001208	1.13602	1.56329	1.23059	1.23406	1.16207	0.622615	0.742344	0.939773	0.756652	2.34484	2.25841	2.27314
EVM0001209	75.392	74.6146	75.031	67.9767	65.3241	63.6085	89.9568	86.3056	72.9418	56.0444	53.692	58.0776
EVM0001210	33.1928	38.7503	36.4946	42.1302	37.4924	35.8375	31.3668	30.5847	30.7702	71.7785	70.4857	64.267
EVM0001211	4.64424	3.81518	4.25431	4.71055	3.39338	3.91591	5.41931	3.65898	4.85693	1.10316	1.77955	2.18007
EVM0001212	6.62806	5.68713	6.90917	8.37211	6.85888	5.64548	5.59169	5.47906	6.72878	12.1298	11.552	7.82414
EVM0001213	0.827957	0.825623	0.931768	0.832782	0.904853	0.846538	0.516826	0.397893	0.684711	1.71018	1.57988	0.942259
EVM0001214	0.0125633	0	0.0117319	0.0133798	0.0128514	0.0529654	0.0845104	0	0.0226157	0.129658	0.019822	0.0184843
EVM0001215	4.06841	3.05464	3.79919	2.44677	2.44806	3.43039	2.20778	2.22722	1.98171	3.29313	2.03899	2.6056
EVM0001216	14.295	14.1798	13.279	14.7246	15.3328	14.5524	10.5641	8.82643	10.3675	21.5873	19.7423	20.2041
EVM0001217	107.538	99.6094	88.483	91.4947	95.2147	82.4879	79.5723	76.6051	71.8412	178.19	167.409	186.524
EVM0001218	92.6764	83.1405	90.2661	79.5966	64.5602	74.7466	128.96	118.503	109.277	41.7092	51.0992	41.0529
EVM0001219	183.395	182.435	176.161	197.508	186.403	181.463	158.737	184.652	156.237	180.992	199.785	209.233
EVM0001220	30.6389	30.0661	32.9715	28.6968	36.4027	32.4884	27.0545	24.5305	28.7271	48.1459	44.9695	47.5738
EVM0001222	0	0	0	0	0	0	0	0	0	0	0	0
EVM0001223	5.05481	8.64097	5.39466	3.53763	7.82996	7.76311	5.41266	5.97369	4.28971	17.3892	10.0262	12.5369
EVM0001224	43.4276	50.3643	45.2576	50.7446	51.8041	57.1067	59.0011	70.3867	70.0887	33.7195	38.6627	36.2538
EVM0001225	0.451527	1.14815	1.03304	1.00983	1.06233	0.618666	0.932891	1.02136	0.934735	0.737821	1.06861	0.66433
EVM0001226	0	0	0	0.173413	0	0	0	0	0.293117	1.68047	0.513818	0.479143
EVM0001227	0.226482	0.188203	0.211495	0.160801	0.231675	0	0.616652	0.0975816	0.373725	0	0.297781	0.666444
EVM0001228	2.96583	2.36598	4.8006	2.73745	4.24738	4.79305	0.760019	4.3447	2.31353	27.8877	17.4698	25.309
EVM0001229	331.404	302.172	326.627	351.186	342.378	328.075	366.349	384.859	393.426	210.003	214.324	202.125
EVM0001230	12.3635	13.7191	11.7769	13.6291	13.0908	12.8349	7.56332	8.41095	8.39486	17.5885	16.378	17.0963
EVM0001231	126.525	123.377	123.511	119.991	110.241	106.063	129.656	132.697	119.928	76.676	93.2992	94.416
EVM0001232	61.1742	62.6646	56.0056	55.1653	49.5331	49.7715	64.3171	66.0599	53.5784	55.7599	60.8699	64.7212
EVM0001233	31.4784	30.2665	25.0498	29.1996	35.3233	29.0536	15.0679	15.8232	19.2887	85.7038	87.6401	86.9152
EVM0001234	12.917	11.9264	12.7547	11.9987	10.4237	12.883	11.2405	10.6361	9.21483	22.218	21.8897	23.9318
EVM0001235	0.236766	0.682062	0.319364	0.644393	0.296016	0.859541	0.505609	1.05413	0.615639	0.362001	0.664112	1.00635
EVM0001236	59.6202	61.7125	70.2127	54.9774	72.4498	69.5995	70.6093	68.2736	92.1961	89.0142	91.7053	94.0115
EVM0001237	3.67511	4.29903	3.95991	4.13978	2.96413	3.68724	5.87478	5.93794	5.75695	15.1957	10.7049	13.31
EVM0001238	14.1416	13.8598	14.5277	14.6875	12.5215	13.6971	17.0745	18.2791	16.5385	18.3883	18.0158	19.8545
EVM0001239	33.3745	32.4768	34.5453	34.1591	29.4038	33.9017	46.1351	42.4216	43.8069	21.5502	20.895	20.1784
EVM0001240	89.1231	93.3361	95.303	86.7484	91.082	104.288	95.5632	82.1926	95.962	79.4293	80.8379	79.2247
EVM0001241	0.997007	1.11544	1.88477	1.32078	1.96511	0.74326	1.96292	1.383	1.53211	0.920197	0.690608	0.679779
EVM0001242	16.4158	16.6056	17.0983	16.9503	16.7115	19.7694	11.0476	9.99722	10.2054	33.9829	39.7637	37.9704
EVM0001243	24.8198	28.7005	30.7073	27.3761	31.5157	28.8612	30.704	36.359	42.0991	31.6679	28.4232	32.0597
EVM0001244	2.71778	3.16181	2.96093	3.47331	2.40942	2.95995	3.04698	2.5176	2.07927	2.88276	3.14457	2.79906
EVM0001245	33.4077	30.3239	30.8637	29.4971	28.04	27.988	32.9955	42.9974	37.1369	16.5759	23.2013	19.7451
EVM0001246	0	0	0.19387	0.663305	0	0	0.199505	0	0.560587	0	0	0
EVM0001247	18.903	20.1904	18.5703	18.7638	16.36	16.2431	24.4323	26.0676	19.5426	11.1142	11.1447	9.74301
EVM0001248	5.44181	5.93163	6.3941	5.4126	2.99225	5.081	8.16603	8.66041	6.14825	3.45738	3.68706	3.94314
EVM0001249	3.38521	3.48115	3.06241	1.80261	3.67926	3.67941	4.98127	5.05933	5.14169	0.727845	0.333818	1.24516
EVM0001250	17.0693	17.3705	18.8842	18.7176	15.9675	17.4982	19.7136	21.8872	17.9913	19.7855	18.7937	19.3581
EVM0001251	0	0	0	0	0.239289	1.72585	0.674383	0	0.421098	0	0	0
EVM0001252	63.7293	62.931	58.8473	64.6218	62.1944	63.4384	73.498	73.0278	70.3234	70.9737	66.7073	62.8938
EVM0001253	13.7426	13.2869	15.057	15.294	12.942	13.3348	11.4244	12.8526	12.1239	14.0078	16.2907	15.1111
EVM0001254	2.21725	2.68626	2.15761	2.36136	1.99253	1.77999	2.21036	2.02225	1.23098	0.801969	0.637545	0.685984
EVM0001255	7.85787	4.45211	6.1705	5.32546	5.84586	6.96438	6.0066	10.1569	4.98299	1.22873	4.22657	1.57653
EVM0001256	2.83819	3.61635	3.73017	2.29498	4.30115	2.49281	2.32335	2.30984	4.06839	3.07376	5.47314	4.79446
EVM0001257	9.74709	9.85555	9.73861	9.00135	9.83115	8.98003	9.36663	10.3081	11.043	13.7173	7.95821	10.3294
EVM0001258	13.6645	15.0379	16.4331	15.51	14.8745	16.4865	17.3858	14.8155	20.3096	9.08452	9.71596	10.4821
EVM0001259	2.26951	7.40654	5.97266	4.94389	6.01493	3.91418	6.24537	4.5336	10.0279	1.59696	2.11591	5.91934
EVM0001260	1.93768	1.10412	1.9387	3.68503	2.69001	2.91751	2.66007	2.68349	1.9932	0.952264	0.873491	1.42545
EVM0001261	36.271	46.5663	37.8352	37.7558	45.6356	39.7985	41.0819	43.321	45.1151	18.0631	24.5596	27.9428
EVM0001262	7.65971	7.86499	8.6322	9.04598	9.53344	8.47277	8.23527	7.76593	9.31372	6.50786	7.79096	7.05441
EVM0001263	43.8819	36.3663	43.7209	38.8394	31.2965	34.1994	78.4243	79.2732	63.7613	39.9951	42.3689	44.4997
EVM0001264	1.66728	0.767345	1.55695	0.956115	0.918353	1.5545	0.554608	1.49198	0.230872	0.441203	0.505883	1.69827
EVM0001265	32.2895	30.5022	32.6944	32.2059	32.7215	33.1031	44.2329	38.0786	41.2559	21.5589	20.1293	20.6935
EVM0001266	39.7146	41.7902	40.077	46.6462	45.3971	48.2098	30.4346	29.3989	32.3189	64.061	61.4671	66.5567
EVM0001267	0.704421	0.889751	0.482392	0.200054	0.384306	1.03941	0.947695	1.09262	0.718566	0.242329	0.444567	0.207282
EVM0001268	36.3227	41.8973	30.492	38.5832	33.9791	39.7707	38.4315	36.4894	41.7555	48.5574	42.8332	41.8809
EVM0001269	8.57158	7.91574	8.02286	9.61357	8.34289	11.0789	14.8761	12.2308	11.332	6.50354	5.37213	5.65034
EVM0001270	21.4007	19.0054	22.1203	20.1819	18.1593	23.9332	34.014	37.8681	35.8285	17.0471	14.4341	18.2671
EVM0001271	52.017	53.9141	59.9596	56.4138	58.3066	56.5004	67.7807	60.9781	62.8175	28.3856	26.3162	31.5592
EVM0001272	0.89408	0.63467	0.38208	0.645552	0.790571	0.670814	0.480559	0.509276	0.777456	1.04262	1.29111	1.67219
EVM0001273	3.80338	3.90785	3.68447	3.11364	4.26329	4.37392	3.11693	3.21617	3.40731	4.32569	4.10807	4.78527
EVM0001274	17.3604	18.3837	17.5096	19.8293	19.9851	17.0813	13.8351	18.1687	15.3188	17.7723	16.5917	17.9799
EVM0001275	0.092959	0.0926969	1.1285	0	0	0	0.357322	0	1.17138	0.159895	1.02668	0.41031
EVM0001277	36.2903	33.0507	24.7334	27.5062	24.1745	24.831	33.9598	32.2492	26.8028	38.6359	35.5553	34.8782
EVM0001278	9.80512	8.63012	7.9884	9.80306	7.72717	9.38524	12.0184	7.63017	10.8515	6.88384	7.49834	6.47708
EVM0001279	11.5648	12.1713	12.7772	10.0312	11.6019	11.1316	12.0506	14.4801	9.12992	21.2342	20.0053	18.2042
EVM0001280	0	0.123289	0	0.263347	0.252946	0.130311	0.712871	0.319622	1.44668	0.637993	0.195072	0.181908
EVM0001281	1.30435	1.04054	1.62405	0.92608	1.33426	0.916495	1.50412	1.91076	1.95667	3.29055	1.37198	3.83816
EVM0001282	33.0139	33.9978	35.8286	39.9608	42.754	46.3777	45.0832	45.8293	52.8357	7.59298	9.18771	11.6769
EVM0001283	14.386	15.3613	14.8178	15.8141	14.8106	14.7719	9.10751	10.1753	10.5865	17.8948	16.171	12.2181
EVM0001284	136.666	136.659	136.928	136.047	138.537	144.042	146.653	145.246	150.857	79.0107	70.2287	61.1605
EVM0001285	133.635	126.28	133.084	119.441	128.828	118.499	106.302	100.904	103.922	136.252	139.649	149.179
EVM0001286	1036.9	1056.12	1043.37	1051.84	1010.11	1006.24	1158.22	1142.45	1159.64	565.105	553.224	575.878
EVM0001287	44.2374	48.3931	49.2169	46.4134	44.1154	37.7542	37.3829	38.0331	30.4838	117.843	120.896	136.24
EVM0001288	3.32174	2.94433	1.4648	1.08094	0.660704	0.486252	3.28075	2.38533	2.40845	1.90453	2.76606	0.814542
EVM0001289	0.149628	0.149206	0.558906	0	0	0	0	0	0	1.54421	0	0.220147
EVM0001290	153.63	147.444	151.871	164.046	161.588	162.503	152.047	154.455	165.166	125.206	137.633	129.047
EVM0001291	8.76471	8.89891	9.92088	7.07148	10.8132	9.06979	6.12552	8.37662	6.93263	7.5836	10.2249	10.3164
EVM0001292	30.7236	28.7354	28.1883	26.2284	21.7746	20.2365	35.6955	36.8473	26.4945	80.7976	84.7604	86.4262
EVM0001293	4.51945	3.68731	4.25527	3.97784	4.62309	5.43261	3.91233	3.33123	3.59717	3.72625	4.83236	5.16569
EVM0001294	178.606	170.294	177.266	185.858	185.558	191.609	211.272	226.284	194.337	117.36	124.886	121.081
EVM0001295	3.22129	4.09297	4.56071	5.58864	3.82663	4.70939	11.0841	9.20055	9.96079	1.34052	1.88543	1.6053
EVM0001296	17.2797	18.2348	12.2197	18.8495	13.9863	11.4048	11.8494	11.4929	10.9475	31.4536	28.1899	30.8539
EVM0001297	28.9745	28.0216	27.9397	28.4981	25.6026	25.1788	35.0953	34.145	31.7251	31.382	31.07	31.6491
EVM0001298	54.2817	58.5718	49.8033	51.4345	50.5921	42.98	23.1029	22.4863	22.1271	88.4362	103.219	99.2462
EVM0001299	137.415	138.727	151.994	140.109	151.43	145.891	159.352	165.19	164.439	100.138	91.6476	86.17
EVM0001300	102.313	98.8812	109.727	110.576	125.013	120.479	112.247	111.238	119.948	102.042	101.74	116.439
EVM0001301	56.9692	49.07	54.1328	47.3979	41.6168	41.4854	73.1353	69.3054	64.9289	34.3826	36.6403	35.638
EVM0001302	5.95758	4.54876	5.33753	5.33805	4.86861	4.20539	6.87638	6.93339	6.92541	3.15741	3.6593	3.55789
EVM0001303	110.915	124.753	117.54	113.99	123.939	125.822	99.248	101.5	130.532	112.739	95.4816	104.018
EVM0001304	4.22616	3.43514	4.11232	4.31172	4.1051	4.07994	2.79847	2.98378	2.94078	5.55883	3.58611	3.6576
EVM0001305	0.528939	0.10549	0.691512	0.450653	0.108214	0	0.203317	0.273477	0.856948	1.09177	1.00145	0.93387
EVM0001306	0.233925	1.32184	1.16504	0.166086	0.398815	0.164367	1.94822	1.20946	1.33348	0	0.492108	0.114724
EVM0001307	1.50264	1.39251	1.65608	1.65685	1.30354	1.6453	1.73993	0.432379	1.47196	0.228324	1.14771	0.40623
EVM0001308	4.89737	5.76231	5.58509	4.78487	5.32	6.13616	3.72054	3.04373	5.04512	15.133	13.7672	12.4342
EVM0001309	34.1611	34.918	32.2928	34.6584	36.7585	40.8907	44.8615	48.6397	54.214	14.2081	11.3393	12.4508
EVM0001310	861.571	816.122	839.399	845.435	771.994	754.371	620.03	676.395	574.108	1385.75	1469.13	1478.72
EVM0001311	6.74232	7.00229	6.89704	7.38909	7.8127	7.04724	4.51659	4.9903	5.48941	2.21357	1.8539	0.493939
EVM0001312	86.0192	86.751	86.6505	84.7452	88.5431	94.1178	99.3883	96.1485	108.656	100.828	97.218	94.738
EVM0001313	37.6898	39.2644	36.6281	37.8775	38.5368	34.9272	31.8614	30.8729	26.535	122.699	118.4	124.422
EVM0001314	300.948	297.015	288.392	287.477	272.786	269.989	254.715	274.483	237.163	381.221	410.318	414.98
EVM0001315	46.3498	43.3689	57.8546	47.1409	49.7833	53.3294	64.6582	72.4918	83.9229	22.3228	19.5012	26.4821
EVM0001316	0.593167	0.39433	0	0.421146	0.404513	1.04197	0	0	0.711856	0	0	0
EVM0001317	156.622	145.763	160.974	150.859	146.663	143.433	162.237	160.824	147.465	148.438	148.053	149.364
EVM0001318	7.118	6.7088	7.94432	7.06528	6.11559	6.5644	9.91525	8.83737	10.0597	10.4713	10.1469	8.9569
EVM0001319	39.9581	41.139	38.4604	36.4864	34.9506	32.6908	44.2973	39.9717	38.0292	48.0515	52.2998	48.4976
EVM0001320	4290.99	4352.14	4388.98	4257.54	4038.24	3974.3	3813.25	3951.02	3814.55	3294.63	3402.97	3415.72
EVM0001321	0.352543	0.468732	0.109738	0.125152	0.120209	0.247713	0	0	0.317313	0	0	0.172898
EVM0001322	0.143014	0.114089	0.10684	0	0.087776	0.994834	0.164918	0	0.051489	0.098397	0.225644	0.126249
EVM0001323	2.21449	1.10412	2.1972	1.17921	1.41579	1.75051	0.931023	1.6101	2.24235	2.14259	1.74698	1.42545
EVM0001324	13.6301	14.8185	16.5073	13.9298	14.1083	17.8122	17.9204	18.8734	21.2724	4.51072	3.67786	4.95394
EVM0001325	0.619919	0.875743	0.771864	0.605193	0.634135	0.408361	1.04251	0.834679	0.557971	1.91045	2.60825	1.63415
EVM0001326	2.8825	1.6425	2.05086	1.16946	2.80819	1.15736	1.97856	2.30647	1.85318	0.708296	3.46509	0.605858
EVM0001327	9.14208	9.58726	8.03309	9.34106	11.7328	11.271	6.09456	8.98253	10.3236	14.1582	15.7016	14.9893
EVM0001328	23.1783	24.2907	23.3679	23.82	26.1261	27.8525	26.175	22.6129	26.3766	24.5049	19.6827	22.3728
EVM0001329	2.28211	4.2985	2.1311	2.43043	3.76104	3.34066	4.38606	1.80265	2.05406	7.63265	7.00127	4.47687
EVM0001330	0.142134	0.204727	0.309701	0.100915	0.242323	0.166451	0.166939	0.102066	0.0852874	0	0	0.16265
EVM0001331	8.92406	8.65171	5.20846	6.20405	7.22689	4.83349	2.50126	3.84501	3.01211	2.34513	1.56446	2.00596
EVM0001332	1.68331	3.02142	1.88631	2.86835	1.60712	1.41933	1.94113	1.59559	1.21208	3.6675	2.47883	3.96264
EVM0001333	205.697	205.179	205.02	203.714	183.102	195.132	228.204	238.902	192.532	159.118	139.923	146.064
EVM0001334	12.1981	11.7514	13.0856	13.7004	13.2062	14.7207	16.0487	12.6195	17.1613	8.89043	8.62618	9.26077
EVM0001335	12.5934	10.9199	10.4752	12.2606	10.8141	10.3136	14.3954	12.5578	14.9363	16.9765	15.0184	13.2406
EVM0001336	7.37621	6.08892	5.38276	5.77465	6.84578	5.92083	8.59045	8.71346	5.84769	13.7798	9.63409	14.8055
EVM0001338	237.524	242.801	214.481	208.379	216.32	190.826	163.565	168.898	146.068	363.673	345.776	352.059
EVM0001339	52.3033	50.1908	59.0943	59.1803	54.5393	57.4403	56.9705	54.8706	69.1707	46.7739	44.5036	39.6779
EVM0001342	0.282873	0.161186	0.150945	0	0.165348	0.255548	0.0776662	0.0522335	0.181861	0.208525	0.382551	0
EVM0001343	284.7	297.202	299.543	309.247	316.317	301.7	326.975	327.172	358.526	234.543	250.648	235.81
EVM0001344	0.976981	0.487113	0.456166	0.780359	1.24923	2.31685	2.81654	1.57853	2.41822	1.68047	1.92682	1.79678
EVM0001345	6.25044	5.76093	4.75048	5.41773	6.07105	5.38244	4.18747	4.40913	4.08184	2.40798	3.45318	2.63993
EVM0001346	236.476	213.368	211.294	212.487	202.845	209.985	218.955	217.932	187.671	240.416	224.839	237.169
EVM0001347	163.869	159.243	160.575	155.72	142.952	152.179	191.163	184.544	197.883	107.551	103.953	109.464
EVM0001348	0.35893	0.0976141	0.36565	0.173754	0.56743	0.412693	0.156782	0.674827	0.41117	0.336754	0.308897	0.720126
EVM0001349	0.416862	0.667287	0.655625	0.80613	0.493751	0.277491	0.400591	0.411209	0.276467	0.490598	0.553865	0.677889
EVM0001350	2.93373	3.96352	3.38031	2.84723	3.12201	3.51597	1.3414	1.89603	0.489781	4.63924	5.63663	3.86385
EVM0001351	15.2498	17.7664	17.2016	17.3665	17.6073	13.3675	7.8351	7.02587	6.93089	14.0243	18.1051	10.8852
EVM0001352	13.8499	12.9688	12.9335	14.0905	13.534	13.826	11.7404	9.09659	8.66534	35.4436	35.7983	31.8086
EVM0001353	184.121	177.453	178.191	177.976	212.115	202.374	158.075	151.004	188.041	331.753	306.873	317.769
EVM0001354	679.818	683.146	671.951	599.487	723.746	694.588	542.203	496.548	551.498	734.11	711.709	740.708
EVM0001355	50.4504	51.3667	38.7741	47.5452	50.0105	52.5152	40.021	40.1919	43.8354	38.019	35.7606	29.8563
EVM0001356	212.316	198.513	212.704	212.176	192.678	176.019	213.369	215.372	176.908	219.723	206.498	240.534
EVM0001357	40.2704	34.485	35.9059	28.8341	34.91	32.1326	28.4226	29.9963	26.0071	75.1376	61.3837	56.9064
EVM0001359	0	0	0	0	0	0	0	0	0	0	0	0
EVM0001360	27.3666	20.7023	21.6782	20.9042	28.1872	24.2684	23.5779	17.3207	22.7632	34.736	22.0358	17.7718
EVM0001361	9.33624	10.9759	9.81971	11.042	11.963	10.7206	7.79132	7.43121	9.02246	17.7493	21.9407	17.1343
EVM0001362	0.0744784	0	0	0.158638	0.0761862	0.235494	0.0715713	0.481344	0.0670358	0.256215	0	0.10958
EVM0001363	32.5744	35.4744	38.3238	25.7904	29.0466	31.3962	35.1129	29.6396	39.8318	17.6937	18.5969	12.297
EVM0001364	60.0053	53.7136	60.2028	51.6017	37.4155	40.6157	96.0729	96.2011	71.4788	28.9732	29.6994	29.8049
EVM0001365	3.61432	3.43251	3.6966	2.19956	3.16903	3.80939	2.89437	4.33808	5.34446	3.10843	0.543103	2.78548
EVM0001366	310.645	296.043	295.745	319.628	305.288	295.308	327.871	304.889	293.118	390.07	391.635	390.855
EVM0001367	175.567	177.605	171.102	189.643	198.832	195.633	176.985	174.733	196.521	186.8	168.117	183.886
EVM0001368	129.097	129.663	116.999	112.031	103.95	108.497	135.033	158.834	116.639	87.1737	95.6119	101.886
EVM0001369	57.8694	54.798	54.9861	54.928	50.9686	48.4382	54.6961	52.8167	45.7312	78.4166	81.3267	75.2962
EVM0001370	0.319398	0.454996	0.639133	0.291563	0.0466745	0.432817	0.701556	0.235912	0.698167	0.4709	0	0.134265
EVM0001371	122.646	121.955	129.154	127.675	118.019	121.258	126.466	113.869	110.408	155.79	161.683	168.374
EVM0001372	0.0994531	0.0991728	0.46436	0.158875	0.559535	0.209641	0.907927	0.642753	0.537089	0	0	0.0731625
EVM0001373	51.2089	52.0777	54.1981	56.1752	59.2396	59.6392	57.4547	57.2539	58.4877	52.0388	47.8454	46.485
EVM0001374	9.86544	8.62174	8.38452	7.2602	7.08684	7.3603	9.79993	6.87739	8.33086	15.4438	9.09441	12.3133
EVM0001375	0.626384	0.48266	0.425407	0.151613	0.1165	0.45013	0.574574	0.33122	0.307522	0.0489736	0.224612	0.0837815
EVM0001376	0.681215	0.242605	0.514968	0.708216	0.481149	0.769265	0.997525	0.859557	0.437958	0.195289	0.46063	0.40568
EVM0001377	1.61828	2.46304	1.82934	1.63275	1.74252	1.61585	1.88251	1.65138	2.68315	1.31852	3.76273	1.62908
EVM0001378	211.703	190.667	209.214	194.651	171.169	168.756	252.893	249.073	211.885	194.502	193.374	200.974
EVM0001379	0.308711	0.246273	0.17297	0.986327	0.189474	0.585671	0.237329	0.319226	0	0	0	0
EVM0001380	21.9063	30.6965	25.5374	21.6527	27.6812	17.0523	10.732	18.6919	21.5214	22.1648	33.8854	22.5404
EVM0001381	0	0	0	0	0	0	0	0	0	0	0	0
EVM0001382	152.879	140.97	146.023	158.953	136.938	147.123	198.993	198.19	205.075	97.056	95.9932	92.3983
EVM0001383	0	0	0	0	0.0437874	0	0.041135	0	0	0	0	0
EVM0001384	1.51695	1.62903	1.63451	1.51198	1.71089	2.07027	2.09317	2.4384	2.10056	4.34875	3.16052	4.46377
EVM0001385	8.27545	8.38174	13.109	8.21345	6.82536	10.5944	13.2818	11.0887	10.8413	4.69508	5.46881	6.37468
EVM0001386	78.2267	79.4338	83.7769	84.357	89.8805	90.0987	101.57	89.6446	98.4745	62.5096	63.1698	62.6787
EVM0001387	2.79161	3.96472	6.24072	3.69379	4.32671	5.34959	3.98332	3.9364	3.7309	0.436522	1.06777	0.373389
EVM0001388	252.342	254.227	256.639	270.407	248.094	244.186	289.289	294.979	234.235	294.737	354.038	336.403
EVM0001389	64.8825	61.2943	64.2128	56.04	68.2757	59.3863	55.7868	50.56	46.6632	54.9999	43.5929	61.4332
EVM0001390	26.2388	24.5028	25.7524	26.7339	27.6414	26.3508	25.3846	27.8931	28.2311	36.7488	36.259	38.7723
EVM0001391	22.576	23.7466	25.0155	24.8893	24.4732	25.3716	26.0621	24.3574	28.8005	32.4765	34.0458	29.8454
EVM0001392	47.595	52.7755	53.0106	53.8564	67.0706	62.7047	69.6778	60.8793	71.3981	44.7706	48.8894	45.2253
EVM0001393	23.4122	30.5297	24.6659	27.4912	19.8552	32.9011	28.6518	30.5207	28.0969	22.7167	21.1532	21.7866
EVM0001394	94.9569	87.3001	96.9949	93.3389	92.7236	84.159	95.0564	100.404	91.9075	76.3093	90.2552	94.6435
EVM0001395	253.04	251.781	248.71	227.956	284.48	277.604	222.523	225.624	281.786	286.479	260.56	284.664
EVM0001396	7.38945	8.94761	5.71754	9.21881	11.5543	5.56305	9.23133	10.2337	9.6915	8.35249	9.32711	9.94018
EVM0001397	5.44318	6.88917	3.51899	3.67883	5.35384	1.21359	1.71004	2.16484	2.26119	4.14115	2.97281	2.31015
EVM0001398	11.1176	7.09794	9.62231	8.73577	9.77765	8.57391	7.88248	7.09757	8.48126	13.0596	15.6159	15.8586
EVM0001399	0	0.0925243	0	0.0988164	0	0	0.0891642	0.119933	0	0	0	0
EVM0001400	0.146979	0	0	0.104355	0	0.0516374	0.0470808	0	0	0.75844	0.541101	0
EVM0001401	3.06259	3.64126	2.52994	4.64157	2.83159	3.28996	1.64132	2.89284	3.12762	1.51957	2.32311	2.77291
EVM0001402	20.9998	24.4308	22.697	20.6563	20.3377	27.769	27.2339	29.9714	28.702	29.6828	21.4751	25.3184
EVM0001403	105.476	112.276	107.56	110.034	108.556	97.5282	122.708	135.778	132.405	62.33	52.7498	60.2973
EVM0001404	0.0818161	0.407927	0.993228	0.522802	0.920615	0.258696	0.864849	1.05753	0.368202	1.40729	1.93631	0.722254
EVM0001405	25.7043	25.8825	27.7765	22.715	30.0459	28.3378	19.7895	21.1551	24.577	22.3707	18.596	19.8065
EVM0001406	8.66746	7.60397	11.6322	9.93696	8.72086	12.1304	11.8793	9.85648	12.7038	4.56218	3.88587	4.32048
EVM0001407	56.1635	56.0052	73.4667	63.0722	44.4857	52.5152	97.2324	96.0408	94.808	39.0929	56.2023	49.1941
EVM0001408	45.7993	47.6711	46.7568	45.3971	47.432	47.4566	42.6175	40.3597	38.4402	82.5555	81.4593	83.2628
EVM0001409	0.214767	0.214162	0.267408	0.152484	0	0.679076	0.963127	0.0925343	0.579917	0.123138	1.01656	0.210657
EVM0001410	142.456	144.734	146.999	138.058	110.182	116.035	169.462	164.246	126.407	69.9494	69.1728	69.0864
EVM0001411	1.38491	1.81065	1.7531	1.60603	2.51852	1.71915	1.56745	1.51164	2.07753	3.28205	1.55383	2.03761
EVM0001412	21.6358	17.6406	19.4316	20.7378	23.0433	23.7425	21.9532	25.9918	25.8887	24.9559	30.9236	20.8785
EVM0001413	29.8719	27.9518	26.2869	28.2715	28.9166	30.8581	30.8174	28.7092	34.4236	15.8332	17.0534	19.1354
EVM0001414	57.811	60.378	57.9055	55.8828	60.1168	55.0159	66.2093	54.9084	54.4981	39.3201	33.0439	34.3719
EVM0001415	7.68077	9.75156	10.0563	10.7731	12.1093	11.0372	13.2781	12.4867	13.3276	11.0322	11.0878	9.69878
EVM0001416	1.50988	1.2045	1.83296	0.402003	1.46728	0.954822	0.362736	0.780653	0.815399	0.259708	2.02491	0.111074
EVM0001417	0	0	0	0	0	0	0	0	0	0	0	0
EVM0001418	1.25823	2.1957	1.82121	2.74702	1.93063	1.12722	6.4688	3.82195	6.00224	2.92172	1.98521	2.03636
EVM0001419	4.6205	5.39172	4.23825	4.18792	4.91082	4.8008	4.84952	4.68045	3.7311	5.0729	6.74722	5.93027
EVM0001420	55.1645	58.1637	56.0378	55.5211	52.2495	49.3198	42.2444	46.5139	45.0546	80.0922	75.1826	81.6482
EVM0001421	5.6888	6.79753	6.50306	7.25979	7.22389	6.35765	7.49322	5.95862	7.06251	5.22995	3.63668	5.19511
EVM0001422	0.948604	0.63062	0.783621	0.777121	0.895713	0.69217	1.36737	1.55626	1.87182	0.606641	0.901847	0.984131
EVM0001423	6.11899	3.05087	4.28556	2.09465	4.47093	2.76396	5.88015	4.51957	3.34385	12.7804	6.20638	15.755
EVM0001424	29.0973	27.569	29.9525	28.6373	27.8345	28.6926	35.2263	33.778	33.7219	18.6332	19.2182	17.0903
EVM0001425	0.0312781	0.15595	0.116833	0.166555	0.255963	0.0659324	0.180343	0.242576	0.506745	0	0	0.0460193
EVM0001426	126.449	130.122	138.03	138.797	133.389	148.799	143.365	156.56	159.411	113.97	113.119	113.749
EVM0001427	14.9045	14.6737	16.9495	17.7169	17.2109	15.4809	15.1546	14.4402	15.8985	21.3096	19.2481	18.3073
EVM0001428	32.4003	33.9977	31.2135	35.8351	34.283	33.4444	21.5851	19.8166	22.0625	34.4962	26.7204	31.8021
EVM0001429	63.0657	67.2494	59.0305	59.1073	60.068	54.4152	62.7624	58.6358	55.9124	45.9527	51.1505	52.7858
EVM0001430	0.934238	0.543436	0.945119	0.663305	0.637107	0.082055	0.374072	0.402524	0.350367	0.535649	1.71969	0.801815
EVM0001431	0.226139	0.0751673	0.351958	0.080279	0.0771083	0	0.144875	0.876906	0.542777	0.129658	0	0
EVM0001432	15.7446	14.3983	16.4958	17.1156	17.9323	19.0026	15.2592	18.8868	19.1831	10.1061	12.5116	11.4413
EVM0001433	16.1077	15.6012	14.646	13.7073	15.058	14.8651	14.7754	20.3223	33.9214	23.5304	27.4815	25.5702
EVM0001434	112.989	136.365	185.231	196.684	211.353	133.286	207.854	140.096	248.608	144.742	137.254	133.071
EVM0001435	0.837999	1.07936	1.0434	0.55779	0.107152	1.03043	1.64413	1.76016	1.6028	1.20117	0.550905	0.976081
EVM0001436	221.147	225.779	210.623	219.607	223.773	227.814	243.218	239.776	266.001	194.96	197.95	196.183
EVM0001437	0.474441	0.569656	0.497297	0.556836	0.50513	0.367382	0.325659	0.337914	0.252733	0.14989	0.0916606	0.142458
EVM0001438	4.18706	3.54897	4.43132	5.57399	3.56923	3.60398	6.57193	6.85531	6.72076	1.32037	1.32125	1.12941
EVM0001439	51.1506	42.7763	53.1895	50.8941	52.3236	59.7642	62.8624	54.5918	61.2175	37.8569	42.5224	49.772
EVM0001440	36.0882	35.5116	34.6417	36.7185	33.3201	34.9658	53.3045	52.3123	46.8889	26.8818	25.2105	27.362
EVM0001441	0.784875	0.647721	0.909854	0.533238	0.858243	0.527719	0.650206	0.822102	0.937864	0.0931057	0.341615	0.378291
EVM0001442	21.0961	20.9791	20.878	19.8333	18.3163	17.4384	26.1825	25.0519	23.2248	19.1571	20.3819	22.0872
EVM0001443	8.99116	6.97341	6.06392	8.2456	7.79219	6.58085	7.56019	9.52338	9.89106	3.86634	6.50193	3.30716
EVM0001444	0	0	0	0	0	0	0	0	0	0	0	0
EVM0001445	11.2584	6.59946	7.03261	6.15709	5.91391	6.73477	7.0177	9.53767	8.21623	5.62635	9.12165	4.14111
EVM0001446	5.94131	5.45329	7.81787	6.61507	4.97254	4.8388	6.94212	7.59232	6.25913	5.80649	5.64574	7.15208
EVM0001447	2.5419	2.51127	3.07702	2.38126	2.04645	2.67909	3.48309	4.6546	4.85118	0.0809672	0.0742694	0.207772
EVM0001448	0	0.0847154	0.0793332	0	0	0	0	0.0549052	0	0.0730637	0.0670198	0.0624968
EVM0001449	1558.59	1533.96	1531.16	1526.93	1490.84	1394.08	1406.3	1409.52	1272.72	1209.59	1260.89	1225.17
EVM0001450	25.4523	25.5956	19.7395	24.0053	22.1746	29.4403	13.8876	10.734	13.7841	58.9909	52.92	60.6146
EVM0001451	42.729	40.461	41.7755	41.0233	41.2054	45.9121	44.4477	42.6407	47.2259	22.6467	21.6228	20.6676
EVM0001452	3.07868	2.50448	4.76638	4.14161	3.64653	5.97734	2.88066	5.23609	4.22947	0	0.255656	0.238403
EVM0001453	0.471837	1.12922	0.704984	0.402003	0.482657	1.59137	1.36026	0.609885	0	0.649271	0.446672	0.416527
EVM0001454	35.0425	33.4745	37.5113	35.2208	40.6832	45.7685	38.4867	39.6074	43.8971	39.9666	36.7704	40.2503
EVM0001455	1.44514	1.73346	1.74068	1.91826	1.30689	1.28032	1.08684	1.10994	1.22533	0.108075	0.13218	0.24652
EVM0001456	0.696868	1.04235	10.7374	1.11324	1.78212	2.93791	2.12061	3.45289	2.29984	1.19865	0.91625	0.341766
EVM0001457	7.36937	7.92657	6.59176	7.03263	7.72893	8.00709	5.62957	6.34138	7.13601	4.84242	5.94424	5.17761
EVM0001458	6.60823	8.1711	6.78804	7.60074	7.52587	9.98299	7.02765	6.03608	9.35798	1.43976	1.80722	1.62044
EVM0001459	0.486701	0.181998	0.738554	0.583125	0.435629	0.57709	0.409241	1.17956	0.219033	0.104644	0.95988	0.716081
EVM0001460	63.969	64.1883	67.9222	68.34	61.6269	63.8137	72.3994	65.7204	68.8635	26.3085	26.1345	28.8911
EVM0001461	15.0063	14.1434	15.2468	14.3096	15.1621	14.4354	12.246	14.1907	12.0255	19.2191	22.4295	21.0592
EVM0001462	3.19373	3.54491	3.58597	3.30007	3.92814	4.16755	1.80856	3.14525	2.87459	8.10932	7.13857	9.11815
EVM0001463	9.12805	11.2647	8.80659	11.6548	11.5556	11.5342	12.0188	14.4061	13.1182	15.8743	12.0945	12.3171
EVM0001464	112.658	110.245	103.83	97.9322	85.703	81.4801	80.273	79.9062	70.6481	174.857	182.479	183.089
EVM0001465	7.53576	7.96315	7.84234	8.18525	7.82362	9.16744	6.84532	8.72287	7.69383	7.73849	7.51242	8.05349
EVM0001466	1.1251	0.641104	0.150093	0.684702	0.164415	0.169404	0.463366	0	0.57867	1.38232	0.507188	0.47296
EVM0001467	0.221449	0	0	0	0	0	0	0	0	0	0	0
EVM0001468	91.6678	90.2904	97.35	100.36	106.44	95.1596	77.0993	88.2241	90.5679	95.5398	91.4499	98.7399
EVM0001469	0.573247	0.262641	0.56425	0.478504	0.427908	0.359246	0.119107	0.260339	0.418348	0.479685	0.806676	0.569876
EVM0001470	37.9627	40.835	44.2312	43.612	43.4177	40.9378	47.9656	41.2321	43.8978	26.6029	28.5618	37.1069
EVM0001471	15.9443	24.0547	18.8041	17.5661	22.2153	26.33	3.33517	3.86423	25.7019	5.49686	5.96384	2.98291
EVM0001472	25.3953	26.5094	24.4272	27.0698	25.381	22.5335	16.4491	20.1824	20.6567	27.8219	26.7947	29.2113
EVM0001473	127.316	139.225	136.771	124.129	141.762	140.033	101.494	103.774	98.3503	258.02	260.774	257.779
EVM0001474	27.0119	22.4161	24.7416	25.4307	26.3244	24.5904	29.2607	31.3369	32.9918	16.6385	14.3502	15.888
EVM0001475	65.2341	73.3644	83.9638	71.3208	70.9603	71.9184	66.2132	67.1628	65.4994	45.3186	49.0418	45.4377
EVM0001476	2.39225	3.0937	3.59526	2.18945	2.90594	3.30928	3.48423	2.8989	4.00359	2.1217	1.47439	1.1549
EVM0001477	3.20809	3.69484	3.2169	3.80742	3.64494	2.78234	3.48103	4.08549	4.58166	1.75113	2.98842	1.91589
EVM0001478	946.101	892.447	958.385	1132.92	1189.39	1202.47	821.96	802.901	861.382	1251.48	1287.78	1229.67
EVM0001479	229.91	214.547	244.553	224.578	233.226	227.438	232.053	206.398	230.794	164.827	157.66	171.009
EVM0001480	6.01641	7.09794	6.72612	7.76112	8.75481	6.1625	3.82724	7.33853	9.45752	3.35236	2.67395	4.23894
EVM0001481	26.329	25.1862	19.5121	28.1217	25.9149	27.9113	23.7567	26.5134	30.518	12.77	13.042	11.0357
EVM0001482	15.0342	17.3469	13.9856	14.1403	17.9127	17.4848	17.2704	18.5766	16.8759	11.6914	13.0418	10.2548
EVM0001483	3.02458	3.65102	2.37847	2.54302	5.04801	1.6778	1.8357	1.44034	2.43578	4.10721	3.76745	5.62112
EVM0001484	0	0	0.0661392	0	0	0	0	0	0.0318742	0	0	0
EVM0001485	0.278617	0	0.0433634	0.148363	0.047501	0.146827	0.0446237	0.180067	0.0417959	0	0	0.341607
EVM0001486	0	0	0	0	0	0	0	0	0	0	0	0
EVM0001487	73.293	71.1492	73.4526	72.1789	69.0797	65.452	64.6619	72.251	56.0338	111.259	112.819	116.735
EVM0001488	1.88594	1.48592	1.63069	2.52924	2.33408	2.4049	1.23059	1.80572	0.922087	0.80097	0.404092	1.26749
EVM0001489	0.117545	0.260475	0.219534	0.208641	0.347361	0.289074	0.112957	0.0506452	0.211598	0.404369	0.12364	0.134512
EVM0001490	20.0552	19.4991	18.7016	20.9157	20.2347	21.2272	20.008	18.1166	24.8309	15.4273	13.5994	12.7234
EVM0001491	0	0	0	0	0	0	0	0	0	0	0	0
EVM0001492	1.37165	2.05168	1.65324	1.44381	1.69678	1.78189	1.37942	1.48434	1.5217	0.82302	0.956255	0.610124
EVM0001493	0	0	0	0	0	0	0.0154605	0	0	0	0	0.0236709
EVM0001494	0.895078	1.33883	2.08962	1.11213	0.610402	2.044	1.29021	0.578478	1.34272	0	0.706116	0
EVM0001495	25.5774	30.8465	26.1725	26.3995	26.716	27.0891	29.9656	29.4648	29.6364	28.8536	31.9043	29.9955
EVM0001496	0.421744	0.360476	0.73141	0.25666	0.308153	0.317504	0.752667	0.233629	0.650742	0.414529	0	0.177289
EVM0001497	0.844016	0.464351	0.380493	0.185973	0.178628	0.58282	0.195776	0.300953	0.0785869	0.200242	0.321437	0.171282
EVM0001498	5.0118	5.45862	4.74831	5.2598	5.89822	5.38486	4.90969	6.98128	6.3285	4.3103	6.25689	3.00681
EVM0001499	284.891	301.744	303.952	329.275	325.148	323.449	324.24	325.501	329.461	283.792	277.314	257.645
EVM0001500	0	0	0	0	0	0	0	0	0	0	0	0
EVM0001501	2.04701	2.0675	2.02834	1.70339	1.94583	2.19912	2.14422	2.35665	2.37564	1.64162	1.54736	1.95619
EVM0001502	0.621715	0.265698	0.248818	0.189178	0.272559	0.37444	0	0	0.159882	0.611079	0	0
EVM0001503	3.77062	2.77523	4.10796	2.29468	1.92854	3.0279	1.89799	1.50856	1.5353	1.69863	0.424942	3.03802
EVM0001504	16.368	19.5622	14.161	20.508	19.2056	17.8856	15.3821	16.3343	17.3322	15.112	12.7226	10.8015
EVM0001505	14.1797	14.1604	12.9118	15.2118	17.6266	13.7852	7.76074	6.7624	8.05376	53.0649	48.1184	45.1155
EVM0001506	12.987	13.1197	14.3471	13.4695	14.3268	14.0458	9.13576	12.5077	9.85563	11.0962	10.3123	10.9901
EVM0001507	132.485	148.417	131.682	145.261	146.936	128.28	86.0259	78.7434	70.9355	378.553	445.379	414.756
EVM0001508	4.7905	5.23772	5.29099	4.5321	4.32823	5.99734	6.30938	5.532	6.06276	9.95485	10.6277	10.304
EVM0001509	14.4495	13.3047	13.1832	11.969	14.1579	12.9537	12.5555	12.523	11.0622	33.1388	32.5375	31.2784
EVM0001510	43.9616	47.8928	37.5349	45.6336	51.5378	53.8687	46.5649	43.2679	50.2409	27.4635	22.0174	19.083
EVM0001511	1.49939	2.07023	1.18476	0.491337	2.24167	0.972503	0.443344	0.596332	0.934311	1.58711	2.72966	2.03636
EVM0001512	11.8813	10.3394	12.0958	12.2508	11.5413	11.1939	14.3553	14.3391	12.5662	5.14982	6.06637	6.02792
EVM0001513	3.44431	4.49339	4.9576	3.80607	3.89417	3.11161	5.45009	4.92067	3.93926	1.91542	2.24729	1.75271
EVM0001514	37.5383	42.9531	43.1244	36.8143	48.2061	54.7923	41.6527	40.4924	54.0837	42.5035	45.592	44.5018
EVM0001515	5.51965	6.5454	6.26887	5.34881	6.66356	5.5555	7.6457	6.81318	6.40031	7.86901	6.19813	6.80411
EVM0001516	31.2896	30.0184	31.7117	30.7963	29.1249	33.9161	30.2107	27.985	31.2327	28.5679	28.5444	31.6362
EVM0001517	35.8024	37.5246	33.8085	32.6089	31.0744	31.3185	41.9926	41.3171	34.9915	33.383	35.947	35.3833
EVM0001518	59.3834	59.9785	58.1909	62.0216	74.2586	75.2136	43.636	43.3202	50.1231	121.724	131.761	118.744
EVM0001519	8.76462	10.442	9.81441	9.59979	11.7122	10.4303	7.9802	9.84154	10.6507	5.97089	5.71905	6.68752
EVM0001520	22.5325	22.469	23.4185	17.0188	17.9379	19.5752	24.4162	27.7844	22.1477	22.8651	22.8331	26.6325
EVM0001521	560.057	587.871	566.032	573.988	570.756	565.524	594.561	593.753	576.007	955.353	969.103	966.884
EVM0001522	69.3	66.3991	69.6395	72.7779	66.0646	73.8152	74.5874	75.0559	70.4314	35.4155	35.7665	35.4419
EVM0001523	10.3485	10.6732	9.67695	9.43367	9.65644	10.503	9.87635	9.90828	8.81607	17.8733	16.126	16.1238
EVM0001524	3.60377	2.34366	2.48739	3.50425	2.72474	4.95426	1.05399	1.41769	0.564113	8.08526	2.71936	5.07168
EVM0001525	50.7103	44.6156	47.4785	46.5667	54.9484	54.4723	60.7118	53.8889	61.1622	33.2321	34.9474	33.9549
EVM0001526	179.932	171.494	172.326	175.605	155.344	162.816	209.452	210.711	199.627	118.748	110.148	114.007
EVM0001527	59.8485	48.8289	49.8715	56.1141	57.7058	51.3079	41.0017	44.6015	41.3674	51.7178	46.536	62.3546
EVM0001528	25.3032	25.6764	25.1901	21.6056	27.1376	29.2534	26.1365	24.3496	21.4704	91.8392	99.367	97.9091
EVM0001529	2.50268	1.95112	1.99713	4.65222	1.90841	1.77449	1.39927	2.58792	1.43346	2.11324	1.65126	2.4771
EVM0001530	6.76002	7.72886	7.37388	6.7339	5.12666	4.82157	9.32423	7.45729	7.60562	4.26013	3.49396	5.35883
EVM0001531	439.355	410.844	439.026	427.109	385.776	368.073	579.575	553.587	564.374	206.451	195.313	204.45
EVM0001532	79.6149	84.4461	85.9448	81.3275	87.3215	91.224	89.888	92.5923	113.537	65.5087	64.5678	66.0636
EVM0001533	477.796	446.283	464.987	485.074	433.316	416.115	466.375	433.89	401.293	538.153	564.593	566.001
EVM0001534	20.4577	24.0804	21.1226	24.6511	22.5448	23.4512	20.8245	19.4234	20.0269	18.1384	23.5427	21.7987
EVM0001535	3.06622	4.07676	1.19305	4.89825	5.48892	0	1.22772	0.330276	0.459969	0	3.2252	5.2632
EVM0001536	10.9471	13.695	12.5151	10.1041	7.1261	8.39124	12.4325	10.5482	10.1518	6.73305	3.66378	4.49029
EVM0001537	0.0715891	0.142775	0.200556	0	0.512615	0.301811	0	0.185069	0.193306	0.123138	0.112951	0.315986
EVM0001538	51.3547	47.9471	50.1979	48.167	44.4166	48.3475	76.8114	78.1207	71.1479	38.0061	38.5895	38.9778
EVM0001539	12.9272	14.4371	14.7314	14.7279	14.8746	13.9251	12.5443	11.1055	12.3048	5.3888	5.14275	4.98193
EVM0001540	0	0	0	0	0	0	0	0	0	0	0.944315	0
EVM0001541	2.59617	2.66537	3.02151	2.92835	2.89119	2.5341	2.49484	2.81023	2.39429	6.62136	7.80896	7.26314
EVM0001542	37.9188	38.2595	39.8441	42.5974	30.9823	33.0679	62.9335	58.7239	51.7792	33.9727	32.7652	33.4739
EVM0001543	0.428151	0.26684	0.0999547	0.455978	0.492715	0.225629	0.10286	0.415062	0.67439	0.276167	0.337762	0.078742
EVM0001544	0.163288	0.0697831	0.0653496	0.149057	0.0238617	0.0737573	0.112081	0.120606	0.293941	0.641976	0.110413	0.54913
EVM0001545	25.8228	28.1924	26.1398	26.8303	25.4127	29.3554	26.765	25.2369	29.1631	12.3982	17.3349	15.4443
EVM0001546	81.0543	80.5283	68.3074	59.896	67.7546	70.754	69.098	70.5743	61.0491	94.3426	96.5809	95.6965
EVM0001547	147.878	146.895	151.37	139.627	154.437	166.656	160.406	158.425	195.32	137.454	130.562	132.077
EVM0001548	2.84547	3.9845	1.46993	3.93308	3.96354	3.3819	1.22176	3.1302	2.23417	0.833086	0.477608	0.712601
EVM0001549	11.6382	10.2756	8.60389	9.29595	8.18474	8.94419	8.73744	10.8123	11.1299	3.75345	3.82551	1.0702
EVM0001550	15.2373	19.2968	16.648	18.9863	17.3013	19.7534	14.4961	12.4081	15.909	11.532	11.2993	8.51907
EVM0001551	0	0	0.0718039	0	0	0	0.147781	0.0993887	0.138417	0	0	0.452523
EVM0001552	0.66903	0.95068	0.890281	1.14002	1.04367	1.12822	0.99652	1.01611	0.843044	0.661694	0.844463	0.689039
EVM0001553	2.47156	2.10001	2.56749	2.72564	3.00695	2.35833	1.46159	1.39885	1.07938	8.22575	8.19138	7.10065
EVM0001554	169.26	162.296	174.459	123.535	209.772	187.984	153.403	164.496	240.898	585.46	549.298	565.381
EVM0001555	27.2623	29.3101	25.6113	27.2886	32.1907	31.7279	25.5681	25.4932	29.4554	35.428	38.5313	31.5903
EVM0001556	10.2988	11.8609	12.3264	9.80957	15.3573	13.9123	13.4513	12.0933	21.2811	9.23156	9.95551	9.17694
EVM0001557	27.579	27.0036	25.7785	26.2665	22.9453	25.9392	33.5194	41.6571	30.7096	16.2643	17.0324	16.3853
EVM0001558	0.715891	0	1.06963	0.914903	1.904	1.20725	0.412769	0.370137	0.773223	2.70903	1.12951	0.84263
EVM0001559	10.9478	11.4229	9.47534	11.4034	9.92877	10.2019	8.72433	8.59408	9.43324	8.17539	7.45697	7.30731
EVM0001561	173.046	177.107	193.161	185.165	214.523	194.96	137.855	139.164	148.963	283.466	259.187	285.147
EVM0001562	90.3981	91.6658	92.5014	94.9052	78.3575	81.638	96.8538	98.7718	84.0796	79.6187	86.5755	88.7321
EVM0001563	2.21715	2.24078	2.74193	2.9037	3.58588	2.74734	2.13061	2.40111	2.42707	1.75221	0.709088	1.05797
EVM0001564	186.212	188.149	192.473	163.575	160.635	159.044	236.171	246.011	208.074	166.775	170.095	179.199
EVM0001565	0	0.0662474	0	0	0.0679581	0	0	0	0	0	0	0
EVM0001566	12.3082	11.5745	12.7401	10.7823	9.98411	11.7079	12.7087	13.6788	13.6507	11.0376	10.5925	10.9289
EVM0001567	0.0623605	0.0310923	0.116468	0.132827	0.0318952	0	0.119853	0	0.0280644	0.268159	0	0.0458753
EVM0001568	1.31815	0.473196	0.541606	1.23536	1.45625	0.66686	0.810687	1.15859	0.901685	0.99761	0.998276	1.08606
EVM0001569	2.23524	2.56751	2.51008	3.04344	3.2995	2.74355	1.95766	2.30406	2.72494	1.8007	2.49994	1.9982
EVM0001570	16.8234	22.7725	23.5319	21.0428	21.4566	21.8059	25.3853	21.1903	23.39	22.6573	22.9291	20.5391
EVM0001571	40.1163	39.2389	45.9324	45.717	55.2813	53.1885	35.3584	30.8808	39.2123	57.3556	64.1008	55.8275
EVM0001572	1.84175	1.37742	2.027	0.665494	1.5812	1.73317	1.07456	0.892727	1.03607	4.41247	5.34473	4.98403
EVM0001573	4.0866	5.79623	5.30946	5.48756	7.1922	5.08298	2.04891	3.74021	2.05615	21.3059	21.706	24.5732
EVM0001574	2.92069	3.18776	2.03539	2.94028	3.41872	2.37383	1.48014	2.1036	1.77871	0.949765	0.504378	1.11171
EVM0001575	16.7888	18.6371	16.1637	16.6439	16.0479	15.0797	19.7486	20.2006	16.2818	14.4561	14.8073	16.1633
EVM0001576	41.6647	40.7499	41.4116	40.1358	34.6706	32.7629	46.813	48.7881	36.764	57.0576	55.0915	59.5222
EVM0001577	1.80564	2.18986	2.7495	2.21751	2.03009	1.7145	1.48505	1.64006	1.62521	1.11921	2.33558	3.63792
EVM0001578	16.7099	17.9757	14.2802	13.8054	15.7464	18.4657	9.73195	14.5301	10.2091	21.2517	21.571	16.5392
EVM0001579	1.60982	1.84021	1.68663	2.02807	1.98814	1.92432	1.30173	1.34492	1.46663	1.41827	1.57972	1.47311
EVM0001580	0.0790889	0.078866	0	0	0.0809025	0	0	0	0.427114	0.136038	0	0
EVM0001581	43.5552	44.5958	47.0736	43.7458	47.7364	46.9819	45.7324	42.0981	45.372	31.9403	26.0002	31.6122
EVM0001582	152.444	166.949	148.449	165.51	170.957	178.02	160.601	152.767	181.523	239.766	226.952	236.29
EVM0001583	45.8106	43.069	41.4759	41.2259	42.2275	41.6251	39.3637	44.6871	34.8418	20.0467	21.4789	17.3996
EVM0001584	1.21603	0.715124	2.41671	1.02941	1.65855	0.887303	2.48695	1.61211	1.40322	0	0.0983907	0.0458753
EVM0001585	0.763655	0.870288	1.12062	0.781601	0.821747	1.0871	0.533707	0.653781	0.964067	0.631178	0.625909	0.919278
EVM0001586	385.425	383.196	406.291	444.642	450.161	441.866	384.686	403.155	412.872	357.853	349.161	357.036
EVM0001587	0.268845	0.312769	0.139475	0.318132	0.397237	0.251871	0.157882	0.115834	0.228537	0.102762	0.0942616	0.13185
EVM0001588	3.11413	2.93941	3.04125	2.3798	3.11259	3.45758	3.88349	3.04198	3.78717	2.16713	2.32542	2.13351
EVM0001589	76.7561	78.3585	77.6684	78.6596	75.948	77.3479	103.413	95.1635	85.9084	90.4651	86.1303	84.6429
EVM0001590	0.268459	0.321243	0.426181	0.600405	0.329538	0.622486	0.412769	0.659307	0.241632	0.600296	1.01656	0.473979
EVM0001591	71.908	73.3364	72.7749	70.1328	63.2442	64.1852	84.8047	82.6191	75.4386	55.675	52.881	58.2444
EVM0001592	0.274071	0.109319	0.102374	0.233507	0.0280355	0.288862	0.0790119	0.495959	0.222015	0.329993	0.302695	0.241943
EVM0001593	2685.03	2732.34	2572.82	2771.84	2280.45	2199.15	2700.42	2764.7	2081.25	2389.85	2873.56	2698.61
EVM0001594	0.925468	0.595393	0.66908	0.508706	0.488614	0.629301	0.459017	0.810354	0.832987	0.462153	0.423923	0.746704
EVM0001595	57.5936	52.1415	60.4463	60.328	58.1391	61.7004	61.7783	61.302	58.3181	66.6947	69.5472	74.5167
EVM0001596	32.8288	27.6927	30.9198	30.1966	23.4648	23.3643	41.5753	46.2979	36.3853	35.8662	33.8783	38.8675
EVM0001597	1.63248	2.12331	1.72329	1.05826	1.16168	1.27174	0.954895	0.458717	0.894384	1.34294	1.11986	0.939856
EVM0001598	4.66674	4.48333	4.4908	4.36395	4.77376	4.46874	3.60955	5.40683	4.73826	2.30044	2.7836	1.71654
EVM0001599	58.2674	61.3407	56.8777	61.5934	62.0391	59.9522	64.8122	64.2919	53.3799	68.7268	69.8034	67.5766
EVM0001600	21.3934	21.642	19.5598	20.8408	20.1938	20.0991	24.6435	24.4712	21.858	24.7786	26.8293	24.8414
EVM0001601	20.0886	12.8289	15.8051	14.6559	18.0682	18.8944	14.491	15.1979	19.1727	11.4272	13.3103	12.4121
EVM0001602	0.500764	1.08193	1.09113	0.444425	0.597622	1.58337	0.160406	2.37334	1.87801	4.45028	1.4485	3.31547
EVM0001603	65.1656	60.9275	62.7864	64.2835	56.7158	57.5407	82.3002	98.6124	69.9985	43.9327	49.8046	47.0416
EVM0001604	10.3876	8.8046	9.86193	9.10834	9.17364	9.70746	7.1539	7.1162	8.07183	12.388	13.2207	12.0738
EVM0001605	20.5491	14.5421	19.7051	16.7076	10.6232	13.5072	14.7572	19.7067	21.4788	10.0716	11.3302	11.7034
EVM0001606	0.974524	0.583066	0.96204	0.800636	0.740533	0.851042	0.361216	0.629822	0.238081	0.694442	1.12024	0.94222
EVM0001607	3.73695	4.88842	4.12756	4.94269	5.22017	4.78566	2.7995	3.71361	4.12303	1.34776	1.14117	1.478
EVM0001608	111.599	113.064	114.165	122.721	119.427	114.274	86.0815	84.9012	82.7909	160.262	165.835	149.727
EVM0001609	40.8829	40.7122	39.2669	38.0384	40.5135	40.4548	36.1378	41.2127	39.4973	23.504	20.8586	18.0616
EVM0001610	0	0	0	0	0	0.114412	0	0	0.34197	0	0	0
EVM0001612	0.16761	0.151944	0.28458	0.308325	0.0467602	0.385433	0.483205	0.157563	0.0960026	0	0.120205	0.0448372
EVM0001613	9.36406	8.2425	7.66486	9.48018	9.34227	11.4534	7.94317	9.48873	10.6134	16.2062	12.8592	12.6717
EVM0001614	226.344	211.568	218.364	177.421	212.058	222.656	239.406	256.568	234.808	167.924	178.799	178.355
EVM0001615	16.6381	17.0526	18.9635	19.9373	17.5831	19.278	23.1888	22.7877	23.7822	13.3995	17.4891	17.4437
EVM0001616	228.335	207.782	222.919	226.519	196.194	197.771	246.821	227.873	215.951	122.664	127.038	133.279
EVM0001617	12.2252	13.4049	12.7352	12.4491	11.808	11.2423	12.3564	11.9616	13.5023	6.70215	6.76251	7.52436
EVM0001618	269.542	313.664	331.267	298.133	300.624	282.887	349.057	338.571	347.478	198.013	160.029	150.721
EVM0001619	0.283909	0	0	0	0	0.074808	0	0	0	0	0	0
EVM0001620	2.79552	1.63979	1.61239	2.10156	1.85034	2.59976	2.05431	2.97576	1.99813	1.1314	1.42699	1.6936
EVM0001621	18.3073	16.6089	16.2146	13.2661	20.0785	23.5224	14.6908	15.796	16.4779	11.768	10.7201	12.9123
EVM0001623	34.0082	35.5883	41.5437	39.5877	34.687	31.9884	42.9411	43.0637	38.6182	54.5851	54.1253	64.5816
EVM0001624	4.01511	4.00379	3.02664	2.36987	2.77111	3.41604	5.11352	3.43904	3.65742	7.48868	7.55612	4.91098
EVM0001625	6.96902	6.95926	6.60044	6.94476	6.57921	7.58964	7.82111	7.45753	8.48186	4.03777	3.96653	3.51507
EVM0001626	13.5293	12.3836	13.7183	11.6129	10.7411	12.4504	12.128	11.1581	11.9047	5.81778	4.46038	7.35316
EVM0001627	0.627532	0.625763	0.234403	0	0.641922	0.26456	0.48243	0.648905	0.451858	1.07939	3.16833	0.553971
EVM0001628	35.4822	35.8338	39.4791	37.8955	33.9791	34.2675	43.48	40.9843	40.6341	25.0186	27.4753	23.5477
EVM0001629	0.141954	0.0707772	0.198842	0.264566	0.363024	0.037404	0.20462	0	0.0958268	0.427298	0.055993	0.208857
EVM0001630	0.696868	0.289543	0.488066	0.123693	0.178212	0.18362	0.223222	0	0.365884	0.299664	0	0.0854415
EVM0001631	113.888	117.558	59.4228	58.7991	70.5114	72.0249	87.1724	111.476	55.5219	67.3471	77.5541	70.3432
EVM0001632	6.10827	3.04552	4.40028	3.7173	4.73088	4.87444	4.02504	3.38374	1.80644	8.55537	6.88391	9.24384
EVM0001633	132.192	133.959	125.607	123.937	118.002	122.119	125.783	121.944	120.405	125.932	131.113	138.472
EVM0001634	221.067	203.844	204.478	196.481	157.397	175.091	253.275	262.945	200.729	128.654	137.349	139.483
EVM0001635	3814.82	3915.22	3985.7	4555.42	4796.14	4496.95	3000.55	2735.02	2507.3	26185.9	29196.9	28351.8
EVM0001636	321.678	326.157	340.07	278.018	306.437	290.498	309.123	346.516	330.253	181.222	178.61	203.736
EVM0001637	30.1527	34.7996	33.3273	44.4309	34.2824	29.6961	50.9213	51.4975	52.8553	40.6413	31.3521	37.9635
EVM0001638	4.16695	6.49802	4.47075	2.54936	4.12646	4.62545	4.64328	7.33425	4.14954	2.59246	2.23813	3.0654
EVM0001639	3.37804	3.36851	2.69447	2.47334	2.66361	2.52192	1.28495	2.36511	1.83695	1.57366	1.77659	4.14174
EVM0001640	108.946	110.068	106.32	112.542	112.514	109.973	66.9429	71.991	67.1034	257.169	281.164	289.413
EVM0001641	322.803	327.295	304.002	310.6	296.686	303.556	250.655	268.781	249.713	325.861	303.712	318.813
EVM0001643	32.209	29.022	30.6625	30.7118	32.1979	35.2395	33.4362	34.6392	36.6188	22.2339	19.1332	20.9986
EVM0001644	1.59664	0.93332	0.822611	1.5245	1.12638	1.18957	1.00524	0.996303	1.8583	1.84666	2.56256	1.37707
EVM0001645	31.4691	34.6927	30.5295	41.3344	27.7198	31.3248	27.0487	26.4395	28.0097	58.9401	64.8222	63.2771
EVM0001646	1.0466	1.05686	1.07631	1.01586	1.45005	1.29857	0.64928	0.633593	1.03741	1.29889	0.815197	1.05256
EVM0001647	0	0.280709	0.2103	0.179879	0.115183	0.534053	0.054103	0.436636	0	0	0.0888296	0.16567
EVM0001648	243.493	242.83	244.233	241.804	228.623	235.292	297.318	308.707	273.988	177.552	165.536	172.624
EVM0001649	12.9629	15.35	13.8704	14.5244	10.3595	7.82747	16.3497	15.7083	15.6782	6.73553	3.1957	4.17205
EVM0001650	8.7084	8.181	7.86047	7.33276	8.5113	8.31984	8.55487	8.1727	8.46663	6.47199	6.33443	7.61909
EVM0001651	0.874141	0.581118	0	0.310318	0	0.614213	0.140003	0	0	0	0	0
EVM0001652	2.35664	2.68571	1.98062	1.43417	1.8941	1.34836	1.71466	2.9591	1.60601	2.43213	2.86836	2.97198
EVM0001653	30.2253	41.222	35.638	37.067	40.5375	36.2329	41.7787	40.8838	38.2518	26.7824	21.2913	28.3892
EVM0001654	15.9399	21.7305	20.3499	17.7475	21.6075	18.3862	10.6046	14.2639	14.8487	63.2712	76.6796	64.6987
EVM0001655	147.946	151.303	151.955	151.133	150.786	149.474	165.29	141.735	153.518	78.2647	90.5556	78.4789
EVM0001656	2.92406	2.6534	2.8944	4.07948	3.26031	2.43468	2.30414	2.6457	2.6845	5.33134	8.11978	5.29166
EVM0001657	0	0	0	0	0	0	0	0	0	0	0	0
EVM0001658	0.167764	0	0	0	0	0	0	0	0	0	0.264694	0
EVM0001660	145.135	141.384	153.745	126.576	129.837	135.223	125.633	125.066	114.175	191.326	193.05	196.835
EVM0001661	144.48	137.327	134.464	141.213	128.59	124.398	156.734	155.672	138.792	227.81	240.459	254.048
EVM0001662	1.02921	1.04644	1.43224	1.07461	1.07346	0.659364	0.387859	0.57387	0.36328	0.0347119	0.159203	0.207842
EVM0001663	0.959731	2.47232	1.26965	0.936932	2.37253	0.758646	0.92227	1.13715	1.15177	3.57672	2.14517	0.706024
EVM0001664	164.398	156.819	165.785	185.833	176.13	177.971	185.72	177.281	192.67	147.558	134.648	140.354
EVM0001665	0.965791	1.18195	0.901882	0.607786	0.224531	0.740302	0.253116	0.226974	0.197564	0.30204	0.415582	0.129179
EVM0001666	15.6847	15.2031	16.8749	14.5367	17.8211	17.918	16.9439	18.1646	21.2391	31.2939	31.6395	32.0597
EVM0001667	23.1242	26.9055	25.4761	27.969	23.8998	27.511	25.9669	29.8898	26.7679	10.0383	11.3207	11.9094
EVM0001668	11.2109	16.5619	9.56428	12.9713	11.4679	11.8159	9.84224	11.9863	11.9592	21.9021	21.4005	17.9199
EVM0001669	0.629117	0.125469	0.234995	0	0.257417	0.132614	0.241824	0.325272	0.33975	0.432847	0.397041	0.185123
EVM0001670	8.09292	7.94362	9.54743	8.42978	8.79753	8.82383	7.33821	7.41103	7.2842	7.76745	6.92478	8.6597
EVM0001671	4.13338	2.69786	3.78969	4.08188	5.22755	4.35646	3.24985	4.17702	3.24684	2.3268	2.2529	2.21143
EVM0001672	65.7859	68.253	58.8882	76.8328	82.6249	80.7558	71.8841	69.0161	71.2412	58.0286	54.3544	52.4043
EVM0001673	0.128749	0	0	0	0	0	0	0	0	0	0.406275	0
EVM0001674	72.8017	71.3942	72.863	71.5493	64.9227	67.9157	89.6488	83.6633	77.5932	115.063	111.945	116.373
EVM0001675	96.6862	90.1044	94.4426	82.2288	77.4642	77.835	107.638	116.285	106.6	57.1358	43.8305	51.9271
EVM0001676	13.6954	13.8365	16.5754	15.641	10.8758	13.1051	16.1047	12.8109	13.3811	16.1179	15.9219	26.3806
EVM0001677	6.24219	5.52988	5.64697	6.79628	5.64417	4.93431	5.30228	5.58311	5.31742	8.91549	9.10131	8.56909
EVM0001678	5.97676	6.49099	6.49305	6.9324	5.65981	8.04568	9.01326	6.57807	6.6578	9.77145	8.58968	8.18412
EVM0001679	234.276	235.148	239.094	234.514	254.528	260.631	243.872	247.587	283.09	182.291	169.189	169.134
EVM0001680	0	0	0	0	0	0	0	0	0.104538	0.199776	0	0.341766
EVM0001681	4.1389	4.44471	3.44029	3.63289	4.79212	3.90688	2.75355	3.20403	2.74281	1.25172	1.39934	1.27144
EVM0001682	6.15136	5.82732	7.61121	8.35273	13.2141	11.1838	9.45801	14.1132	10.9349	1.58711	0.970546	4.52523
EVM0001683	22.0456	25.9804	26.806	22.8216	25.9889	28.0449	15.5258	13.2315	15.3468	43.6474	45.2907	47.6779
EVM0001684	3.07456	5.10983	3.96889	3.27439	3.0834	3.20873	1.79591	2.53252	2.11619	1.34803	4.28027	2.79398
EVM0001685	1.91459	1.7695	1.61347	1.29304	1.14643	1.77183	1.83986	1.14684	1.30296	1.4458	0.442067	1.71764
EVM0001686	95.8485	103.037	99.8655	103.698	119.705	110.91	53.9729	53.2602	56.0302	327.223	386.77	357.87
EVM0001687	8.59725	7.57835	7.11906	7.91666	7.77405	6.78342	5.36324	5.31071	3.89044	11.5198	9.25534	9.53923
EVM0001688	72.8085	73.8866	75.2704	70.6873	78.8038	78.9859	73.1822	73.9575	81.4196	95.1913	89.5216	94.5711
EVM0001689	91.8007	96.0588	84.175	90.6115	96.8403	86.2522	101.856	102.558	78.8899	168.551	173.904	198.045
EVM0001690	0.535045	0.400152	1.06173	0.641046	0.342071	0.352451	0.12854	0.605137	0.481578	0.115039	0.105522	0
EVM0001691	0.618142	0.6164	0.577238	0.897706	0.6898	0.592277	0.252006	0.387392	0.472073	1.321	1.4186	1.46066
EVM0001692	3.76319	3.44588	3.76759	3.96923	2.99815	2.70775	3.26858	3.41429	3.33828	8.71353	9.79109	8.6778
EVM0001693	87.4994	80.5202	84.1051	84.2703	84.257	69.8779	100.304	91.6315	70.4911	70.1424	47.5094	53.2433
EVM0001694	0.0618408	0.070476	0.148497	0.0376343	0.0813329	0.0372448	0.0424479	0.0685147	0.0238548	0	0.0418161	0.012998
EVM0001695	3.6885	3.63654	3.24982	3.24023	4.26337	4.30488	2.22284	1.93939	2.77597	6.05769	7.10191	7.14385
EVM0001696	0	0.309567	0.14495	0	0.793903	0.327197	0	0	0.27942	1.86893	1.71433	1.37026
EVM0001697	0	0	0	0	0	0	0	0	0	0	0.104401	0
EVM0001698	0.134483	0	0.125584	0	0.0687835	0	0	0.0869148	0	0	0	0
EVM0001699	3.09478	3.96044	4.14233	3.46072	3.74614	2.88127	2.35441	4.46693	4.27114	5.85554	5.73737	6.64029
EVM0001700	19.0674	20.4646	20.289	21.6426	19.9665	20.0436	20.059	21.3382	23.259	15.2765	12.3503	18.8993
EVM0001701	72.431	73.7419	69.6201	68.665	77.924	75.1911	51.8044	50.3268	59.441	138.69	142.882	140.986
EVM0001702	1.03804	2.6913	0.969352	0.442203	0.849476	0.875253	0	0.268349	0.747449	0.357099	0.327559	0
EVM0001703	4.30595	3.89948	4.2672	4.39864	4.22491	4.26049	2.95563	3.01006	2.88697	2.94748	3.60488	3.68483
EVM0001704	0.583899	0.582253	0.27263	0.0518207	0.348418	0.461559	0.374072	0.0628944	0.0875917	0.0836951	0.0767717	0
EVM0001705	4.06053	3.88037	5.13477	6.30646	3.89403	6.15203	4.30849	4.15509	4.34003	3.78319	6.807	2.98712
EVM0001706	88.0888	88.5993	78.9539	76.7425	69.1765	68.1024	85.2228	86.8982	65.8708	181.452	182.989	191.45
EVM0001707	1.53934	1.61579	1.70228	1.29425	1.49176	1.40894	1.6739	2.56568	2.11473	1.81162	1.47002	1.72842
EVM0001708	3.59297	3.89897	3.89797	3.09495	3.83751	2.28327	3.19885	2.39039	3.94729	2.90829	2.91781	3.18734
EVM0001709	130.148	131.442	132.273	132.395	127.421	130.498	163.581	136.777	132.141	114.367	120.813	115.235
EVM0001710	0.376045	0.937463	0.234108	0.133495	0.384669	0.264227	0.542051	0.162022	0.958991	0.32341	1.68106	0.553274
EVM0001711	32.7856	32.7665	29.0034	31.6195	26.5931	25.2797	30.4995	28.3429	24.7717	93.1776	102.819	93.8391
EVM0001712	77.3179	67.3327	70.7434	76.0942	67.1837	72.8131	90.806	92.2938	85.4775	80.9831	73.3882	71.4291
EVM0001713	7.45062	7.89397	5.2182	4.13274	9.68562	6.87115	1.93911	2.20699	4.33101	8.0097	7.34712	2.05539
EVM0001714	0.0721071	0.719039	0.404014	0.460762	1.03265	0	0.485048	0.0932038	0.324508	0	0.455075	0.106091
EVM0001715	14.621	13.0932	8.51335	9.03743	8.15263	9.00433	19.6704	21.1221	13.7276	6.11465	5.60884	5.9052
EVM0001716	177.743	175.444	182.847	174.44	171.793	171.029	232.292	210.019	220.816	106.505	96.4522	99.8565
EVM0001717	84.5271	89.7471	76.6649	81.0207	79.9132	83.7045	74.6157	73.4404	72.7353	77.2796	71.2202	73.6691
EVM0001718	39.3003	40.9226	43.0801	43.8675	47.6907	45.6918	44.1025	44.9858	54.2915	30.6979	29.5296	31.8678
EVM0001719	59.3033	63.721	63.7034	68.554	72.9494	67.6467	53.562	61.7355	69.0018	132.026	140.647	134.054
EVM0001720	46.3868	47.9283	51.1473	50.34	51.521	53.324	49.1376	46.7323	50.4752	86.0949	78.2554	76.4871
EVM0001721	114.342	113.991	120.652	123.495	141.302	140.329	90.8298	97.7604	99.7506	166.286	177.05	185.463
EVM0001722	19.8852	21.8008	28.7509	24.9078	27.9114	25.424	22.0405	18.2551	19.6777	22.3491	17.4698	24.3532
EVM0001723	25.3477	32.6124	26.4184	33.0495	35.3017	28.2666	30.7211	28.4414	33.3493	34.2815	27.9634	35.1292
EVM0001724	3.60944	1.79963	2.49131	3.34264	1.84611	2.97724	3.16694	2.63701	4.66126	2.56436	3.71406	6.34958
EVM0001725	0.810179	1.13105	1.13485	0.690269	0.331503	0.939296	1.01212	0.837774	0.218766	1.39356	1.91742	0.95361
EVM0001726	71.9311	73.0814	69.4942	75.101	72.0963	75.2969	74.4295	71.8088	71.1716	81.3278	75.6409	79.8245
EVM0001727	224.387	220.825	241.876	225.674	226.296	223.398	281.587	267.838	253.828	153.334	126.478	149.028
EVM0001728	51.2589	39.73	50.0251	51.3415	53.1435	43.0157	48.4142	68.5859	52.5017	33.7886	32.3062	33.0502
EVM0001729	259.954	251.658	268.461	298.437	319.948	310.568	249.236	268.187	256.109	323.919	341.882	319.366
EVM0001730	39.7302	31.6235	36.2138	42.0594	35.2953	40.873	50.3352	55.5761	49.0697	32.688	22.3006	26.3877
EVM0001731	0.197387	0	0.0263322	0.0300308	0.0576894	0.02972	0	0.0364481	0.0253803	0	0.0444902	0
EVM0001732	1.03525	0.898508	1.19948	0.5921	1.21587	1.15174	0.276344	0.272583	0.224321	2.34127	1.90562	2.03087
EVM0001733	203.069	192.467	205.816	204.073	184.352	188.261	255.366	232.147	226.881	309.279	317.793	317.216
EVM0001734	7.62854	7.05878	6.28943	5.05027	7.87377	6.664	3.10402	4.53048	1.73202	3.66457	5.42167	6.26917
EVM0001735	149.526	140.645	145.869	154.686	144.66	151.012	174.372	177.259	178.144	84.2512	81.4305	80.4815
EVM0001736	6.92627	6.95454	5.86367	6.94253	8.43347	8.20944	6.35652	5.51413	5.73799	11.625	12.2894	13.1173
EVM0001737	39.9597	42.0151	41.8683	39.0484	49.3342	48.4702	37.007	36.1087	37.3008	69.9513	68.4268	62.3791
EVM0001738	3.49656	3.48671	2.17679	2.48254	5.06705	1.22843	1.40003	0.376631	3.14715	7.51787	6.43625	6.8593
EVM0001739	9.39718	10.011	9.202	10.2446	8.42529	9.04537	8.67439	10.1673	7.85794	12.7228	13.0147	12.6269
EVM0001740	38.1498	38.982	34.8481	37.8529	39.7382	37.4482	32.0619	30.5013	32.1783	49.9991	50.266	46.8197
EVM0001742	0	0.602249	0.281993	0.804006	0.617801	1.75051	0	0.390326	0.815399	0	0.238225	0
EVM0001743	2.14041	1.74949	2.32645	2.9148	3.01504	2.14499	0.977855	0.997806	1.42121	3.50058	3.93071	4.59471
EVM0001744	1.41624	1.07845	0.949815	1.02838	0.869232	1.11272	1.45994	1.91381	1.58761	1.08514	1.07663	0.947142
EVM0001745	0	0.0914178	0.0428049	0	0	0.048312	0.132147	0.296246	0.123773	0.157689	0	0
EVM0001746	8.1076	5.48276	6.20772	6.55034	7.56267	8.61066	5.40305	5.21976	6.09516	14.6402	17.35	16.8647
EVM0001747	5.33106	3.69746	5.65967	5.48723	6.3368	5.2421	3.72059	4.21531	5.0932	0.717186	0.51689	1.55557
EVM0001748	0.412638	0.462909	0.337166	0.164796	0.738675	0.271818	0.0991329	0.400024	0.139276	0.532322	1.13934	0.683001
EVM0001749	9.14493	9.31719	9.01422	9.26709	9.30266	9.1517	10.9228	9.8146	11.0912	10.1211	9.00697	8.24282
EVM0001750	13.9664	12.045	13.7472	12.1606	15.1554	10.9407	13.6933	13.0515	13.0804	7.46662	8.93343	8.05286
EVM0001751	99.1775	97.3995	90.6944	93.2417	81.8733	95.1108	117.499	128.297	133.971	78.3577	79.9868	69.8179
EVM0001752	70.6136	67.6514	66.6769	71.8455	72.3336	71.634	71.7744	67.0781	76.7142	49.6302	47.8952	48.794
EVM0001753	0	0	0	0	0.116367	0	0	0	0	0	0	0
EVM0001754	383.42	389.282	380.144	387.046	369.985	366.771	358.24	396.351	340.154	282.98	306.326	289.408
EVM0001755	14.4506	13.9196	14.0301	12.9752	10.367	13.5031	15.1204	15.995	11.2855	12.4045	13.4472	12.1779
EVM0001756	3.76822	3.70837	2.79665	3.65679	4.00612	4.28377	3.04133	2.86428	3.13988	4.09461	3.71263	3.73646
EVM0001757	115.843	104.078	115.318	117.263	115.565	114.224	97.1977	95.9108	81.5204	162.776	172.027	152.507
EVM0001758	73.8171	68.808	67.4497	64.2904	55.7364	58.9392	94.1184	86.5956	74.7111	49.107	53.0614	50.3697
EVM0001759	26.4159	27.2813	23.312	24.6332	28.5591	29.5331	16.2786	15.3107	18.2735	67.6516	68.1243	68.0618
EVM0001760	0.675882	0.86269	0.732142	1.18049	1.32745	0.512899	0.597541	0.349451	0.632675	0.558028	0.938422	0.5171
EVM0001761	47.2363	52.0614	49.2858	47.438	56.2668	52.0785	47.931	49.8762	54.7767	40.7137	42.6576	38.1023
EVM0001762	0.673325	1.02174	0.437405	0.561198	0.658818	1.01821	0.956498	0.794642	0.764137	0.151064	0.554272	0.172289
EVM0001763	0.0378713	0.113294	0.0707305	0.0134442	0.051653	0.0798305	0.109179	0.0163172	0.159072	0.0651409	0.0398349	0
EVM0001764	43.4302	44.4693	45.1127	44.1696	48.2032	51.5191	44.2906	42.3298	47.7945	19.3183	20.8066	19.4994
EVM0001765	1.24001	1.61122	1.22814	0.840386	0.980165	1.50496	1.42632	0.947115	0.913173	0.937183	1.12645	0.469928
EVM0001766	2.17495	1.57732	2.46185	2.45668	2.49449	1.66715	3.16675	1.789	2.72878	3.8544	3.01562	4.26665
EVM0001767	59.9573	58.4633	59.557	64.031	63.8806	73.6963	46.4448	47.6588	39.1663	148.268	142.816	135.621
EVM0001768	53.0648	49.6511	49.5533	56.1208	47.2547	51.3854	64.4286	63.361	59.3291	36.5773	35.5701	35.5776
EVM0001769	0	0	0	0	0	0	0	0	0	0	0	0
EVM0001770	0	0	0	0	0	0	0	0	0	0	0	0
EVM0001771	1.98182	2.10674	1.65863	1.74226	1.76908	2.20702	1.26665	1.32916	0.967617	2.36369	2.5074	1.63673
EVM0001772	3.72674	3.00353	3.57548	3.15342	2.87221	4.00859	5.8625	4.55314	5.00852	2.89777	1.85259	4.13113
EVM0001773	127.346	117.247	122.878	104.166	129.444	129.028	159.277	158.563	172.843	171.638	178.613	177.923
EVM0001774	59.9661	59.1771	56.9594	58.1743	56.7311	57.8793	72.2231	64.5796	63.6425	63.5511	62.2171	61.1907
EVM0001775	29.3374	30.4711	30.6975	33.7983	33.6266	33.6446	43.252	46.2051	47.9732	24.6798	24.8238	21.0497
EVM0001776	77.0039	80.3426	77.8122	78.6626	73.7221	74.6792	76.4247	70.3584	71.1306	86.2674	84.9398	81.7599
EVM0001777	30.2441	27.9249	30.8127	30.4424	27.7123	30.3751	47.2566	40.5049	43.2288	59.2291	55.7478	56.5839
EVM0001778	1657.86	1649.86	1674.26	1664.55	1724.71	1674.15	1560.14	1482.98	1500.93	1383.85	1376.59	1428.38
EVM0001779	2.11788	1.55615	0.520458	1.30584	1.82438	1.17484	0.214233	1.4408	1.10362	1.91731	5.10025	0.656007
EVM0001780	63.9299	62.0222	63.7688	62.4933	55.1652	57.6345	80.8199	76.1911	74.206	64.2047	61.5599	64.1921
EVM0001781	0	0.0985173	0.0307528	0	0.0673742	0.138837	0	0.042567	0	0	0	0
EVM0001782	2.15762	1.50107	1.73371	2.0841	2.36108	2.82937	0.819718	1.0053	1.40006	0.819925	1.26669	0.701343
EVM0001783	134.566	131.997	122.783	121.121	108.913	117.154	166.529	169.763	148.909	59.2981	60.3021	58.3988
EVM0001784	28.0758	31.199	28.399	25.8067	32.3531	33.6938	32.6378	32.3277	38.2338	17.576	18.1181	17.6113
EVM0001785	45.1388	44.8194	49.5869	51.6968	48.6697	47.1689	39.4896	37.5966	30.1677	64.6092	71.624	70.0968
EVM0001786	130.834	128.256	131.115	124.958	123.092	126.714	146.63	141.134	130.426	113.903	119.809	125.177
EVM0001787	0	0	0	0	0	0	0	0	0	0	0	0.177074
EVM0001788	122.918	119.773	128.214	121.964	135.299	134.295	137.291	141.311	151.39	128.236	125.058	121.533
EVM0001789	6.54431	10.6787	6.94461	7.60326	10.3459	4.07581	9.14745	2.49925	3.34679	14.0708	19.7122	19.4761
EVM0001790	42.6611	36.5415	43.9241	35.852	38.4922	39.0838	47.1454	41.6398	43.9116	30.1045	31.1523	32.7918
EVM0001791	24.6215	24.8651	29.8187	28.6576	29.9572	28.0302	28.2288	32.7526	26.7629	29.0051	30.4267	28.8352
EVM0001792	0	0.19258	0.180345	0.822704	0.790211	0.203547	0.185586	0	0	0.332185	3.35177	1.989
EVM0001793	11.1574	8.89057	7.37421	7.27058	7.03554	7.35642	7.88228	7.37549	8.89602	12.619	12.2985	9.44469
EVM0001794	0.153193	0	0.214584	0.16315	0.430941	0.121096	0.11041	0.0495033	0	0.329377	0	0.112696
EVM0001795	130.152	115.782	134.088	120.118	112.44	116.011	127.538	135.248	136.851	140.762	124.592	137.732
EVM0001796	129.885	156.691	137.042	137.774	140.96	150.981	156.362	133.839	152.293	49.7707	49.3386	56.6998
EVM0001797	74.1505	82.8093	94.1569	85.3766	88.9609	80.6336	79.802	80.4626	70.1543	157.686	164.45	169.899
EVM0001798	2.34101	2.36323	2.24008	2.30849	2.42426	3.01566	2.22186	2.54029	2.3412	1.44165	0.866398	0.467748
EVM0001799	453.27	457.862	451.743	442.651	427.104	408.378	360.624	394.847	338.907	568.104	615.314	667.822
EVM0001800	0.605174	0.536416	1.00467	0.358059	0.756619	0.566966	0.64617	0.434574	0.484178	0.578298	0.212184	0.0989323
EVM0001801	112.636	119.349	118.277	123.526	127.357	124.023	66.952	67.4349	71.7891	225.629	221.49	240.395
EVM0001802	0.184727	0.301429	0.203868	0.286158	0.22332	0.176998	0.30662	0.0434134	0.272075	0.346628	0.317954	0.222373
EVM0001803	4964.36	4856.15	5087.8	5158.55	4995.34	4564.8	4503.32	4411.31	3889.92	4153.59	4579.17	4628.47
EVM0001804	14.4135	12.5143	14.027	16.0267	13.3176	13.8527	12.1129	11.9028	12.7744	4.2745	4.35656	3.6563
EVM0001805	60.9332	58.753	60.6081	59.1039	53.509	51.1755	74.2835	70.2174	54.897	60.5779	60.781	61.4839
EVM0001806	1.41367	1.72166	1.35258	1.57959	1.57647	1.3312	1.93752	1.88718	1.3767	1.97318	1.49915	2.21631
EVM0001807	2.47614	2.06603	1.69882	2.4218	2.48123	2.13043	1.69964	1.11041	2.13773	3.38991	3.42841	2.97399
EVM0001808	1.56932	1.5649	1.83185	1.53204	0.802655	0.827011	0.50269	0.338078	0.353126	2.24944	1.85703	1.7317
EVM0001809	39.5674	35.9492	40.1739	39.8353	29.6055	31.1038	62.2613	58.8938	51.7237	24.1946	23.3907	22.8171
EVM0001810	6.96099	6.57603	5.70207	7.67353	7.99507	6.04954	7.27606	10.1026	6.48522	27.5176	24.2779	25.5143
EVM0001811	3.06784	2.42626	2.96362	2.25327	1.40678	4.34839	1.7282	3.69194	2.76128	4.18511	2.67055	1.55645
EVM0001812	2.91191	2.58107	2.5178	2.64173	2.75804	1.36403	2.17642	2.23044	3.30042	6.49271	6.4661	8.56856
EVM0001813	0.937587	0.467472	1.00062	1.42646	0.205518	0.635264	0.128713	0.779079	0.783616	0.460773	0.211329	1.478
EVM0001814	308.708	294.163	322.003	303.781	318.904	321.676	418.338	428.768	506.757	282.796	297.388	307.135
EVM0001815	0	0	0	0	0	0	0.0754272	0	0	0.0270018	0.0495364	0.0230967
EVM0001816	14.5139	14.9503	16.4372	13.9115	16.442	15.6878	14.4816	13.1123	14.1893	44.7774	49.2587	50.387
EVM0001817	3.34827	3.082	3.58587	2.74299	3.16159	3.18349	3.9376	4.6608	3.62485	4.99402	4.43313	3.27271
EVM0001818	23.967	21.7707	24.1479	26.1447	19.7026	20.7095	24.943	26.4012	20.1309	11.2658	14.6206	19.7727
EVM0001819	0.131467	0.436988	0.32738	0.0466705	0.313791	0.138562	0.421119	0.736368	0.315546	0.753771	0.553134	0.451329
EVM0001820	161.299	176.994	169.116	149.373	172.374	166.703	177.893	192.906	200.242	230.272	235.47	221.144
EVM0001821	9.20902	8.84709	10.1727	9.88728	13.5559	9.19312	10.3605	10.8388	10.3104	11.0752	12.8169	11.0156
EVM0001822	29.5463	27.7216	27.2584	22.4708	24.2447	24.9428	22.5021	26.0748	23.5783	5.76263	6.748	4.61457
EVM0001823	158.864	150.369	162.305	160.065	135.408	143.4	199.336	196.84	166.281	125.84	116.86	125.838
EVM0001824	75.5925	78.1798	66.4462	76.041	75.4309	77.2641	74.9732	71.3402	73.7494	65.4737	61.8889	60.1565
EVM0001825	98.2479	96.1708	92.346	108.436	99.8443	100.591	126.45	129.119	135.624	79.2173	71.3351	75.9059
EVM0001826	54.8381	53.9975	51.5764	47.6742	43.9985	45.7997	63.5268	67.8336	55.8891	41.6968	41.7622	40.1969
EVM0001827	1488.86	1465.87	1439.22	1579.21	1651.16	1545.97	1162.03	1109.93	1105.61	1411.69	1373.53	1451.46
EVM0001828	0	0.0244516	0	0.104457	0	0	0	0	0.0220703	0	0	0
EVM0001829	1860.81	1866.63	1864.25	1810.94	1864.85	1831.45	1728.71	1584.2	1615.01	1402.91	1394.81	1488.87
EVM0001830	176.843	183.747	173.187	169.754	169.424	176.136	194.988	191.355	179.632	152.44	153.253	146.458
EVM0001831	70.2947	70.869	62.2592	69.8297	63.4455	61.7313	48.9915	53.9329	46.8441	151.579	149.957	159.889
EVM0001832	2.69152	3.01125	2.1456	2.02749	3.29046	3.39031	1.82945	2.20619	2.65891	0.790417	0.621456	0.193172
EVM0001833	1.28465	1.09802	1.45671	1.22156	1.17331	1.49905	0.749521	1.30468	0.908502	1.57834	1.08583	1.28257
EVM0001834	3.78084	2.69298	2.77408	3.88276	5.11067	5.83502	4.1523	1.04722	3.40302	9.52264	8.94796	9.93344
EVM0001835	0	0.208325	0	0	0	0	0	0	0	0	0	0
EVM0001836	1.32315	0.829349	0.706053	1.44941	0.889437	1.43441	1.5258	1.07503	1.22495	1.75569	1.49116	1.55739
EVM0001837	0	0	0.0814154	0.139277	0	0	0	0	0.0784724	0.0749814	0	0
EVM0001838	1.88353	2.27134	2.16794	2.2392	3.31576	2.40069	2.08362	1.47209	1.49818	1.6199	1.93512	1.7723
EVM0001839	10.6354	13.9468	11.4282	10.0853	11.9225	10.9023	10.9903	14.5944	15.6046	11.0262	11.1485	7.60954
EVM0001840	0.318887	0.476981	0.223339	0	0.0815497	0	0.15322	0.309138	0.215265	0.548504	0	0.117294
EVM0001841	216.979	217.729	214.135	220.153	214.252	231.363	237.719	256.455	276.983	238.051	235.042	235.024
EVM0001842	83.8026	77.2256	80.6501	76.6149	77.7635	76.022	56.7278	58.7608	54.756	180.549	181.337	192.977
EVM0001843	11.5091	9.98452	11.3613	10.5444	7.83912	11.8207	16.8249	19.9195	16.665	7.5529	8.42847	8.72381
EVM0001844	38.5792	37.6228	32.7595	32.1729	27.9926	23.9144	24.9774	25.0178	18.7745	106.511	104.406	120.834
EVM0001845	25.9884	26.8088	25.9424	28.95	32.7568	37.5918	29.5095	28.7269	33.1781	22.4022	20.6433	21.3598
EVM0001846	31.1318	27.9622	33.2953	36.6072	30.9204	32.7326	27.816	33.7122	35.0091	11.6692	13.4393	12.6433
EVM0001847	2.74272	2.38045	2.51379	2.00141	2.90952	3.6402	2.53804	3.41386	3.97725	0.873637	0.320547	0.747286
EVM0001848	44.0951	40.8055	43.5915	46.9457	48.3386	48.3521	44.7066	47.9548	47.7945	44.6925	49.0177	46.8509
EVM0001849	126.147	116.919	109.86	109.287	117.915	110.657	106.403	126.252	96.1006	186.712	207.766	164.654
EVM0001850	4.20301	7.33454	5.15933	4.18739	5.72096	4.93	4.49497	4.6879	4.57622	17.6655	15.295	17.4046
EVM0001851	125.406	122.921	128.236	131.512	133.142	123.725	89.9033	87.4071	91.5469	235.115	238.654	230.179
EVM0001852	71.5396	64.0637	70.6299	66.9211	65.3253	61.9571	68.6242	71.6824	67.7312	31.5519	30.5572	35.2736
EVM0001853	10.5171	10.7475	10.7546	9.85845	12.6477	14.1308	11.6727	11.9651	14.1993	17.5295	19.3021	17.5839
EVM0001855	44.8037	46.0638	41.15	48.4107	46.6438	54.7581	61.9238	56.1883	72.6081	21.7676	22.5635	21.5835
EVM0001856	4.99611	4.84737	3.27846	3.45134	4.42004	5.83502	4.41182	3.31619	5.10453	4.41293	6.3914	6.95341
EVM0001857	2.07608	1.28157	0.830873	1.5793	2.5282	1.77135	1.23503	1.53342	1.51269	0	0.155981	0.290908
EVM0001858	52.5731	53.4853	56.1883	51.3914	53.2183	51.5982	61.6301	57.7083	63.9604	33.9628	34.7504	34.9298
EVM0001859	0	0	0	0	0	0	0	0	0	0	0	0
EVM0001860	3.33976	2.37882	2.86629	2.30347	2.87949	3.45296	1.84923	2.36401	3.07759	1.80544	1.12915	2.29309
EVM0001861	0	0.477746	0.149131	0	0.980165	0	0	0	0	0	0	0
EVM0001862	1.84664	1.54371	2.13748	1.73113	1.6062	2.14443	2.25273	2.24399	2.59766	1.16022	1.41317	0.911073
EVM0001864	5.12324	5.91018	5.34707	4.06542	6.67935	3.2822	2.99257	4.80432	4.7017	4.49254	3.01143	3.1038
EVM0001865	0.33085	0.329917	0.247166	0.211412	0.473812	0.348706	0.317936	1.11189	0.476462	0.341449	0.626408	1.07091
EVM0001866	18.8037	19.3343	22.8203	19.5582	20.5072	19.5872	23.2023	25.44	28.5809	17.7448	10.505	15.8244
EVM0001867	92.4124	89.3208	97.2998	92.3714	92.9342	91.8642	103.538	117.982	110.265	74.2278	60.4725	59.3154
EVM0001868	73.5803	61.4329	61.6779	56.9722	48.9931	59.0287	71.6362	64.4038	54.9288	69.4267	67.9495	60.8065
EVM0001869	0.567818	1.5571	1.19305	0.907084	1.4521	0.897695	0.272827	1.46789	0.894384	5.86009	5.82327	5.848
EVM0001870	27.4825	23.7906	23.8093	25.1706	17.8022	22.2149	34.2826	35.106	34.4341	30.4041	30.7093	30.0614
EVM0001871	24.9988	24.4834	26.5502	25.3258	21.9465	24.0235	35.5027	35.9512	35.099	27.8102	26.3356	26.7301
EVM0001872	17.7209	18.743	21.4988	17.7276	18.5444	18.8726	14.7847	15.4301	14.315	15.5593	13.3948	12.4909
EVM0001873	21.1642	18.8805	18.6116	14.858	18.4943	20.0558	18.9701	17.481	19.9462	14.9369	13.5516	13.2654
EVM0001874	0	1.08857	0.14563	0.166086	0	0	0.224794	0.403154	0.210549	0.268243	0	0.114724
EVM0001875	0	0.078122	0	0	0	0	0	0	0	0	0	0
EVM0001876	26.8251	28.0759	27.4567	27.4766	30.3317	30.1422	24.4466	27.4737	26.115	42.5659	48.4452	46.6029
EVM0001877	87.0346	89.357	96.1838	98.7245	102.727	92.139	54.3148	54.2523	52.0317	131.988	163.526	154.763
EVM0001878	70.4883	63.2719	74.972	79.5067	88.2304	81.5914	76.4476	88.2005	88.9845	32.5384	44.5925	44.3166
EVM0001879	216.22	230.2	203.218	189.448	199.304	214.482	232.851	236.192	241.056	233.354	239.771	241.352
EVM0001880	3.28212	2.42644	2.64219	3.01331	3.9073	3.19087	2.09361	1.38975	2.47027	8.80885	11.2944	10.5322
EVM0001881	33.5816	31.5983	28.6044	29.9845	24.9627	29.0983	36.0859	31.1191	27.5704	23.0548	24.7106	26.3654
EVM0001882	2.27632	2.52211	3.54281	5.56682	3.27717	2.93232	3.15967	2.39744	3.79416	7.54077	6.51793	3.72126
EVM0001883	59.156	62.6547	56.5072	59.5234	51.1646	49.0233	48.6377	46.363	40.7929	110.182	106.23	104.842
EVM0001884	5.00937	4.00382	3.928	3.90958	5.20247	5.76337	4.85059	3.45992	5.23157	1.7759	1.87033	2.64429
EVM0001885	2.59292	3.70371	2.74854	3.20924	1.36203	2.14197	1.41421	1.63048	2.0815	1.2054	1.87966	2.47456
EVM0001886	21.8761	17.2462	18.0251	15.8426	13.5846	14.7563	21.9126	23.6192	21.4506	17.3532	15.268	18.1
EVM0001887	8.81584	9.39105	10.424	10.8628	9.17188	11.5749	9.19458	9.83948	10.968	5.48587	5.79163	4.07271
EVM0001888	4.63498	4.04417	7.30396	5.24474	6.22291	4.88513	5.19641	5.36699	9.90805	4.15231	6.24648	4.54628
EVM0001889	48.1807	46.4803	48.7861	51.8089	54.031	50.9598	49.2259	45.724	54.6026	35.4485	38.1095	36.4859
EVM0001890	201.289	202.122	195.655	187.973	179.519	190.273	235.945	242.66	204.896	305.259	300.784	303.35
EVM0001891	22.1273	20.4588	25.496	20.5284	21.9594	17.0876	17.7112	21.3314	14.7826	23.7082	23.6218	26.8449
EVM0001892	5.76511	5.33517	4.48858	4.7534	3.96569	5.81994	4.19287	3.62422	4.87999	3.76477	2.61822	4.50419
EVM0001893	27.3368	25.0805	26.4925	25.9186	24.0211	24.9384	35.195	34.5259	31.2033	12.3191	11.5508	12.3351
EVM0001894	5.25026	6.80952	6.40894	5.26258	5.58127	5.35279	3.92415	3.81455	4.077	5.78441	4.3855	6.76541
EVM0001895	0.970918	1.02368	0.733421	1.0933	1.57517	2.93308	1.30742	0.807346	1.07428	0.850975	0.839124	1.10095
EVM0001896	51.4686	51.0375	53.6872	61.4503	62.5439	59.6326	59.6072	57.2254	61.2275	71.801	75.8168	65.8667
EVM0001897	172.662	163.589	181.967	178.309	209.626	185.148	105.171	99.1535	110.169	342.287	353.866	345.864
EVM0001898	0.849307	0.826748	1.07636	1.35676	1.24112	1.3214	0.699563	0.705724	0.83724	1.07825	1.11668	0.92231
EVM0001899	9.19929	8.84129	8.51281	8.68891	8.13283	8.51123	7.24018	6.88696	6.40671	14.9642	11.8217	13.1674
EVM0001900	0.392331	1.30408	0.976985	0.83566	0.668879	0.551341	0.377017	0	0.235417	0.224944	1.03168	0
EVM0001901	2.33608	2.37547	2.13844	2.58611	1.6193	2.52695	1.99382	2.30439	1.95047	1.42751	1.33368	0.859264
EVM0001902	0.976981	1.09601	1.33048	1.25724	0.83282	1.20133	2.15152	1.63114	1.9419	0.630175	1.22032	0.658821
EVM0001903	13.527	15.3327	14.2677	17.1008	16.0272	12.3082	19.6388	24.1514	18.657	19.5847	15.5079	12.1704
EVM0001904	23.224	27.2288	25.8275	26.0825	27.0681	25.3675	23.1967	22.1047	27.4276	15.7366	13.6576	13.6677
EVM0001905	0.688205	0.960771	0.59982	0.244311	0.750918	0.725348	0.749521	1.18607	1.23887	0.157834	0.144778	0.607532
EVM0001906	0	0	0	0	0	0	0	0	0	0	0	0
EVM0001907	0	0	0.114041	0.520239	0	0.128714	0	0	0	0	0	0
EVM0001908	29.1617	25.1316	31.6505	32.394	34.9668	35.2137	50.665	48.8021	59.3614	22.4225	21.3294	25.1466
EVM0001909	0.114149	0.626049	0.47968	0.243136	0.116767	0.12031	0.438774	0.73773	0.46234	0.0981716	0.540304	0
EVM0001910	21.8493	24.4408	25.0714	21.0369	29.3605	25.7477	23.3208	20.8427	27.8661	42.5745	37.7806	38.5524
EVM0001911	7.14042	6.80731	6.4481	7.96662	8.93622	7.41553	4.85095	3.38078	5.17918	14.8463	18.2401	16.6628
EVM0001912	202.523	203.364	201.465	205.379	200.582	205.108	194.432	178.4	184.892	228.064	229.512	225.041
EVM0001913	73.3312	72.5838	72.2122	74.1176	75.8414	73.6535	64.8314	58.3494	59.8293	158.856	155.59	156.316
EVM0001914	8.51596	8.48104	7.35958	7.41409	7.40119	7.33736	6.37434	7.32891	6.45315	11.2025	12.5209	13.7212
EVM0001915	26.2862	24.2559	24.1804	20.1951	25.9525	21.6401	20.2333	17.242	19.775	14.1715	20.6337	12.8916
EVM0001916	261.703	250.048	254.067	251.438	221.919	220.743	343.495	332.52	290.67	292.444	287.235	304.675
EVM0001917	3.71106	6.62665	4.67438	4.19736	5.59124	5.94283	4.61672	4.09031	5.12685	7.3729	6.3545	6.34891
EVM0001918	9.20698	6.48073	12.4751	3.84525	3.87804	5.89844	5.72492	8.63385	4.54969	11.4893	12.2479	8.23396
EVM0001919	737.46	744.357	753.356	691.569	792.805	765.387	680.27	666.933	790.258	497.641	458.858	524.696
EVM0001920	36.6246	38.4482	35.6682	37.5047	42.674	41.6277	32.9389	29.3657	35.1754	30.3489	27.4395	29.6796
EVM0001922	21.8491	25.3696	24.8233	21.8739	25.4194	24.4982	18.2753	20.1569	19.6277	34.0198	35.9398	42.095
EVM0001923	1.76647	1.41685	1.20132	1.5541	1.02134	1.59873	1.29159	0.819008	0.915949	1.55225	1.45414	1.55375
EVM0001924	0	0.327957	0	0	0	0	0	0	0	0.848552	0	0.241943
EVM0001925	82.8938	85.3458	86.2112	88.122	85.9425	83.6616	87.4946	95.542	74.8796	86.7332	89.946	95.1033
EVM0001926	1268.07	1202.72	1290.93	1338.87	1270.28	1263.53	1384.69	1282.49	1199.29	1900.87	1973.77	2002.73
EVM0001927	53.02	54.1445	44.7393	55.2754	41.8204	53.5251	62.7673	64.4038	57.6398	8.51544	11.5906	15.5076
EVM0001928	57.5798	56.0937	61.5314	58.4624	50.4439	53.5168	95.226	87.6267	86.3402	46.9905	47.8873	51.3139
EVM0001929	41.5977	44.5599	42.3289	39.3348	41.3643	40.8718	34.8154	36.9438	39.3437	60.0354	61.1517	65.1973
EVM0001930	0	0	0	0	0	0	0	0	0	0	0	0
EVM0001931	22.4641	22.3872	21.1948	22.0737	26.1001	25.1761	21.3244	20.3185	23.15	31.3682	34.0618	31.5618
EVM0001932	5.73754	4.76153	5.2345	5.86924	5.2127	4.95314	4.22588	5.36699	4.14495	16.8161	22.9589	19.8545
EVM0001933	41.4777	39.3289	42.5561	38.9996	36.6005	35.6928	49.5673	44.6754	41.3234	37.3514	35.0356	36.4046
EVM0001934	0.0591758	0.354054	0.66312	0.315109	0.302664	0.686065	0.56866	0.0764891	1.49135	0.916074	0.746928	0.0870651
EVM0001935	14.3614	14.1108	12.9356	14.3038	11.6376	10.4549	15.5892	13.7749	11.8043	14.7067	13.6287	10.9782
EVM0001936	2.95137	3.80865	2.94521	2.58851	3.25583	3.32413	2.69714	2.69284	2.44809	3.93182	2.92178	3.32061
EVM0001937	245.708	239.173	262.278	248.15	206.799	219.645	288.909	323.17	295.914	150.042	154.862	167.721
EVM0001938	71.8918	77.7224	78.4345	79.5966	70.5551	87.1002	92.4107	88.6013	92.5769	62.3189	60.4206	71.4237
EVM0001939	17.938	18.6075	17.7012	18.8941	16.8888	20.9819	15.503	13.5554	14.757	20.6638	23.0975	20.0175
EVM0001940	3.92074	3.58388	3.40704	3.53763	3.09154	3.30013	5.25908	4.36398	5.29341	0.796155	0.773255	0.360535
EVM0001941	213.497	209.171	206.508	198.892	181.841	185.785	232.514	231.77	207.582	203.573	207.791	213.991
EVM0001942	0	0	0	0	0	0	0	0	0.046862	0	0	0
EVM0001943	65.3728	69.0032	60.9198	63.0103	68.2506	64.9122	52.3946	50.3089	52.7503	116.473	114.957	119.618
EVM0001944	0.14736	0.275521	0.275217	0.0784686	0.39569	0.116485	0.194711	0.0952367	0.265268	0.126734	0.203438	0.271012
EVM0001945	5.64499	6.86552	5.27145	6.81115	6.54214	6.947	6.67891	6.79045	6.40251	8.98009	8.958	8.54549
EVM0001946	357.81	355.264	361.049	360.631	355.661	355.719	370.67	365.85	363.555	344.548	331.467	335.241
EVM0001947	124.655	118.514	122.892	121.033	103.314	107.732	146.193	143.617	131.173	79.7962	75.8239	74.9115
EVM0001948	58.7559	65.6882	65.1405	56.9236	62.8833	53.0608	70.5159	75.9464	66.6298	60.1039	68.813	61.8841
EVM0001949	1.03804	1.55267	2.18104	0.829131	3.451	2.46165	5.237	4.02524	2.1022	0	0.409449	0.381817
EVM0001950	2.9039	3.14168	2.31388	2.63889	2.6723	3.2497	2.30571	2.40572	2.64399	1.40783	1.07909	1.2702
EVM0001951	0	0	0	0	0	0	0	0	0	0	0	0
EVM0001952	43.6694	43.9746	41.1808	41.0182	43.2061	44.3663	31.6456	31.6467	31.4444	69.4496	85.1654	91.8467
EVM0001953	0	0	0.0876251	0	0	0	0	0	0	0	0.296099	0
EVM0001954	0.753513	0.751388	0.791607	1.30404	0.385396	0.595635	0.362051	0.730478	0.169554	0.324022	2.97218	1.10864
EVM0001955	9.19409	9.75966	5.90843	11.3709	8.29251	11.1491	8.36021	8.68941	6.40671	14.454	10.2947	14.109
EVM0001956	3.86221	2.93186	2.48566	2.89038	3.61265	3.55724	2.12322	2.72097	2.55239	1.52615	2.14103	2.12452
EVM0001957	95.7956	85.4752	95.3335	96.1257	88.4327	95.7542	123.454	112.569	115.035	72.6	66.8183	72.6822
EVM0001958	0.862255	0.184248	1.55288	0.524741	1.44905	1.03862	1.95313	1.27375	1.99566	0.953441	4.76155	1.44987
EVM0001959	13.1827	11.7344	11.2323	10.3115	11.3898	9.96925	9.34005	10.2045	7.10579	16.2056	12.5148	14.7933
EVM0001960	0.0806246	0	0.225869	0	0	0.169952	0.154955	0	0	0	0.127207	0.237245
EVM0001961	0	0.383672	0	0.102441	0.19679	0.912426	0.0924347	0.497327	0.519463	0	0	0.141523
EVM0001962	14.4919	13.3735	14.1135	15.1658	13.4765	14.0103	10.2704	10.0069	11.5781	55.7864	53.7174	57.2575
EVM0001963	21.8165	24.8428	27.4705	23.0096	28.3639	27.3702	24.8198	24.3789	27.1109	25.9048	28.0924	31.7879
EVM0001964	16.0112	14.3973	13.9475	13.6797	11.856	12.9504	14.372	14.9297	12.5292	12.1602	10.1488	9.78623
EVM0001965	77.5857	81.987	74.4683	77.1504	74.0631	71.9239	62.6719	60.496	49.3705	81.3139	93.7299	94.6833
EVM0001966	3.78872	4.48093	6.17094	3.65961	4.91209	3.94676	3.55616	2.50554	3.33081	5.07706	4.79609	2.59271
EVM0001967	181.556	204.263	208.975	200.465	181.999	160.406	128.831	125.791	104.936	346.549	425.099	412.302
EVM0001968	22.7837	20.3838	22.5685	19.6157	20.2567	21.7691	37.9571	42.3854	41.9721	8.79013	9.74279	9.24192
EVM0001969	5.10115	3.51059	5.40098	4.7823	3.63799	5.26288	8.14705	7.9402	8.82712	1.79193	2.26717	2.32559
EVM0001970	151.258	148.084	144.529	151.791	130.652	135.079	182.806	187.915	157.875	111.922	106.05	104.886
EVM0001971	6.06295	6.41104	6.83969	5.80697	7.72125	5.85408	3.18687	2.7087	3.91884	21.6622	21.8926	19.1579
EVM0001972	0.0853185	0.765702	0.159346	0.454318	0	0.359693	0.163977	0	0.153585	1.02727	0	0.376586
EVM0001973	123.683	126.853	135.624	136.419	145.686	149.752	147.56	152.647	179.766	56.2205	54.4864	56.6196
EVM0001974	0.173989	0.0867491	0.162475	0	0.0444946	0.114612	0.229897	0.759015	0.0978764	0.187044	0.0686287	0.191992
EVM0001975	4.02868	4.13277	4.97289	4.73437	5.21054	4.88059	7.00863	6.31469	7.41892	2.98689	4.749	3.5428
EVM0001976	90.6718	85.5535	87.4671	84.5842	89.0469	83.4544	103.464	85.9966	89.3028	72.4164	59.951	72.5274
EVM0001977	529.321	521.878	543.979	525.82	551.608	556.07	459.811	447.295	468.919	553.921	512.864	542.041
EVM0001978	54.8523	56.0052	46.3248	47.7114	44.2622	42.3807	43.4711	40.6761	34.6187	129.683	126.541	127.004
EVM0001979	12.675	12.2035	6.12223	6.0512	5.58866	10.1345	12.3903	10.734	6.6877	49.618	39.6519	43.4065
EVM0001980	8.53977	7.74736	8.57427	9.50509	9.19536	8.6623	8.32985	7.01305	6.55944	6.07437	7.14214	6.14056
EVM0001981	2.51264	3.64014	2.96616	4.59454	3.83113	3.59762	2.59679	2.81882	2.09087	5.38197	4.71236	5.44062
EVM0001982	34.3217	35.1071	34.0031	35.165	34.4507	31.2413	37.6033	34.3224	36.364	49.9616	50.3202	51.5859
EVM0001983	0.491902	0.358913	0.392129	0.421653	0.306818	0.328773	0.772463	0.744374	0.842298	0.454005	0.492167	0.458952
EVM0001984	0	0	0	0	0	0	0	0	0	0	0	0
EVM0001985	241.909	255.388	243.891	254.588	239.514	233.809	269.689	259.688	243.289	269.325	277.309	259.499
EVM0001986	256.644	255.008	247.144	257.95	257.984	248.596	216.203	217.581	224.501	277.147	258.046	272.332
EVM0001987	5.77478	5.24172	5.00088	3.81096	4.89743	3.66748	8.72723	5.7099	5.99736	2.63181	3.19285	3.0863
EVM0001988	2.00281	1.99716	0.957948	1.0925	1.84886	0.720797	0.79802	1.57853	1.45093	1.76449	0.924873	1.0062
EVM0001989	0	0	0	0	0	0	0	0	0	0	0	0
EVM0001990	37.2686	39.8209	37.2156	33.0685	41.5101	39.1523	26.7343	28.8617	34.1985	79.3142	76.5119	71.3484
EVM0001991	3.43359	2.13994	2.51409	2.36858	2.03555	2.46743	3.48704	3.68166	4.31964	1.74495	1.10811	2.69813
EVM0001992	0.83587	1.21978	0.837673	1.32444	1.00102	2.0413	0.74447	1.23854	0.513795	2.66509	2.21947	4.43932
EVM0001993	12.8447	9.50078	10.6766	13.2285	7.65251	9.44678	17.362	15.4168	14.6102	17.602	17.5935	15.6794
EVM0001994	49.3595	49.8406	46.1223	53.0975	44.3828	44.4838	45.1613	39.6393	37.6524	83.6708	82.3928	93.7639
EVM0001995	3.6813	4.58866	4.51698	5.19703	3.43731	4.91766	3.9284	4.53704	4.48855	11.7806	10.7048	11.8717
EVM0001996	52.79	49.6057	58.8718	52.0406	59.3268	55.6391	49.9596	53.2212	65.3958	43.2652	40.6974	43.4903
EVM0001997	1.4082	1.26811	0.825242	0.948808	1.367	1.24189	1.04255	0.845097	1.00881	1.29761	1.08824	1.75476
EVM0001998	0.830434	0.414046	0	0.589604	0	0.291751	0	0.536699	0.24915	1.19033	0.436746	0.814542
EVM0001999	5.47027	5.53681	5.91845	5.99114	5.1006	6.39114	8.21422	7.14156	9.37873	8.78087	8.67408	8.06182
EVM0002000	2.49865	5.27634	3.56859	1.56532	4.81119	3.71789	1.83615	3.79964	5.42397	27.8095	26.4366	27.68
EVM0002001	0	0.19258	0.360689	0	0.131702	0.0678491	0	0.0832091	0	0	0	0
EVM0002002	14.8845	16.4566	16.2161	16.3952	17.2415	16.7448	10.6853	11.7801	13.4921	22.0312	20.0977	20.4757
EVM0002004	4.36481	5.7587	5.83179	6.32911	4.56794	5.4143	3.22649	3.25491	3.50556	7.7965	7.78726	7.01472
EVM0002005	0.612301	0.915863	1.35799	0.815121	1.87903	0.726016	0.956153	0.593584	0.482225	1.44814	3.38126	1.91436
EVM0002006	36.2513	33.2447	33.6582	32.3482	26.6016	27.5732	36.3357	39.5969	39.7911	28.6276	25.5209	23.569
EVM0002007	19.7422	21.5167	20.8309	19.5217	20.3634	20.3117	18.101	18.7813	17.1446	60.5492	60.8866	62.9054
EVM0002008	0.31055	0.447308	0.58	0.220489	0.211781	0.218207	0.198952	0.401409	0.186345	0.890275	0.762188	1.06613
EVM0002009	140.455	129.867	133.621	128.409	119.417	116.476	147.02	142.019	118.945	162.617	169.827	169.527
EVM0002010	11.6584	11.7686	14.2702	10.2003	15.5951	11.8717	19.4076	15.4402	20.5347	12.7723	13.0175	16.414
EVM0002011	228.309	227.385	226.95	224.648	197.103	198.687	230.462	223.443	217.627	147.601	147.228	135.403
EVM0002012	364.569	378.191	366.379	426.74	382.597	338.046	241.512	246.328	221.029	995.754	1116.75	1091.62
EVM0002013	114.562	129.954	135.533	148.44	128.966	143.522	172.481	176.501	187.202	136.347	121.941	122.181
EVM0002014	8.08662	7.07135	7.49342	9.60591	10.181	5.57277	5.02125	4.10062	5.87881	19.9012	20.7086	21.05
EVM0002015	1.05452	0.525773	0.738554	0.280764	0.53935	2.50072	0.380009	1.19266	0.593214	2.04057	1.87177	0
EVM0002016	402.136	384.87	395.817	398.166	397.229	396.54	404.799	388.425	369.929	338.078	320.567	330.016
EVM0002017	5.16555	6.86798	5.22571	4.81362	5.61425	5.75625	2.94733	3.5123	4.62514	10.5047	10.9092	12.5084
EVM0002018	73.0382	72.0036	65.8047	59.7335	62.2181	61.2134	80.8297	81.6165	65.8092	65.6907	70.8687	69.5836
EVM0002019	6.57959	8.91792	7.03899	5.30644	7.25322	7.54064	3.37624	5.03671	5.17465	11.3173	8.36536	9.02262
EVM0002020	0.440938	0.29313	0	0.313064	0.601399	0.154912	0.141242	0	0.132292	0	0	0
EVM0002021	132.24	136.154	134.61	133.612	131.856	126.52	134.224	130.873	125.953	167.136	172.947	172.45
EVM0002022	9.15792	10.3007	10.9432	10.1922	10.4557	11.0931	10.1768	10.2104	12.6181	9.18255	8.14903	8.62081
EVM0002023	25.9487	25.3762	27.1224	23.805	21.4445	17.681	39.0224	37.4243	34.4803	48.0787	51.7151	50.0335
EVM0002024	92.8991	90.4532	110.613	113.709	122.101	108.878	130.489	155.23	139.962	68.4374	87.5411	98.8192
EVM0002025	329.909	304.889	312.778	287.834	250.467	254.619	442.055	398.783	298.753	340.218	408.159	451.701
EVM0002026	12.3133	9.13757	9.89408	12.5037	8.20184	14.4869	7.9802	13.3249	8.50546	16.2542	29.8192	26.1215
EVM0002027	0.859069	0.285549	0.534815	0	0	1.20725	0.275179	0.740274	1.54645	0	1.35542	2.10657
[truncated: 6,259 more rows]

## Sheet: T2_VS_T1
Supplementary Dataset 2: Differentially expressed genes between 1 and 2 h of toltrazuril treatment (T2 vs. T1).
	baseMean	log2FoldChange	lfcSE	stat	pvalue	padj	T1-1	T1-2	T1-3	T2-1	T2-2	T2-3	COG_class	COG_class_annotation	GO_annotation	KEGG_annotation	KOG_class	KOG_class_annotation	Pfam_annotation	Swissprot_annotation	TrEMBL_annotation	nr_annotation	nt_annotation
EVM0005945	1400.9	-1.74353	0.0771564	-22.5974	4.60135e-113	3.45515e-109	45.158	49.2901	49.2673	13.9029	14.174	14.8229	--	--	--	K05293|3.02672e-139|tgo:TGME49_077570|GPI transamidase subunit PIG-U, putative; K05293 phosphatidylinositol glycan, class U (A)	--	--	--	--	GPI transamidase subunit PIG-U, putative {ECO:0000313|EMBL:CDJ44399.1} (Fragment) OS=Eimeria tenella (Coccidian parasite) PE=4 SV=1	GPI transamidase subunit PIG-U, putative, partial [Eimeria tenella]	Hammondia hammondi Toxoplasma gondii family D protein partial mRNA
EVM0007560	31497.5	-1.29897	0.0607643	-21.3772	2.17972e-101	8.18377e-98	2496.26	2959.75	2638.12	1118.3	1073.58	1097.43	--	--	Molecular Function: actin binding (GO:0003779);; Cellular Component: actin cytoskeleton (GO:0015629);; Biological Process: actin filament depolymerization (GO:0030042);;	K05765|9.72753e-51|tgo:TGME49_020400|actin depolymerizing factor; K05765 cofilin (A)	[Z]	Cytoskeleton	Cofilin/tropomyosin-type actin-binding protein	Actophorin OS=Acanthamoeba castellanii (Amoeba) PE=1 SV=2	Actin depolymerizing factor, putative {ECO:0000313|EMBL:CDJ67467.1} OS=Eimeria necatrix PE=4 SV=1	actin depolymerizing factor [Eimeria tenella]	Eimeria tenella actin depolymerizing factor mRNA, complete cds
EVM0003421	71668.3	-1.34547	0.0631468	-21.307	9.77437e-101	2.44653e-97	1015.18	1183.54	1032.37	429.829	416.298	425.355	[Z]	Cytoskeleton	Molecular Function: structural constituent of cytoskeleton (GO:0005200);; Molecular Function: ATP binding (GO:0005524);; Cellular Component: cytoplasm (GO:0005737);; Cellular Component: actin filament (GO:0005884);; Biological Process: cytoskeleton organization (GO:0007010);; Biological Process: actin polymerization-dependent cell motility involved in migration of symbiont in host (GO:0070359);;	K10355|0|tgo:TGME49_009030|actin; K10355 actin, other eukaryote (A)	[Z]	Cytoskeleton	Actin	Actin GN=ACT1 OS=Toxoplasma gondii PE=3 SV=1	Actin, putative {ECO:0000313|EMBL:CDJ63179.1} OS=Eimeria necatrix PE=3 SV=1	hypothetical protein [Eimeria tenella]	Eimeria tenella clone Etm008A10 hypothetical protein mRNA, complete cds
EVM0008195	1280.21	-1.90522	0.0899163	-21.1889	1.21e-99	2.27148e-96	97.078	112.837	107.667	26.1585	30.1109	28.6555	--	--	--	--	--	--	--	Sporozoite antigen OS=Eimeria tenella (Coccidian parasite) PE=2 SV=2	Sporozoite antigen {ECO:0000313|EMBL:CDJ44154.1} OS=Eimeria tenella (Coccidian parasite) PE=4 SV=1	sporozoite antigen [Eimeria acervulina]	Eimeria tenella mRNA for sporozoite antigen
EVM0007986	14524.8	-1.04139	0.0513101	-20.2961	1.3925e-91	2.09125e-88	845.1	929.309	843.443	428.528	424.665	418.786	--	--	--	--	--	--	Sporozoite TA4 surface antigen	Sporulated oocyst TA4 antigen 8 kDa subunit (Precursor) OS=Eimeria tenella (Coccidian parasite) PE=1 SV=2	SAG family member {ECO:0000313|EMBL:CDJ40594.1} OS=Eimeria tenella (Coccidian parasite) PE=4 SV=1	SAG family member [Eimeria tenella]	Eimeria tenella mRNA for surface antigen 9 (sag9 gene)
EVM0006223	8741.26	-1.4082	0.0700907	-20.0911	8.83535e-90	1.10574e-86	170.811	197.825	171.369	72.558	64.5227	66.2775	--	--	Molecular Function: organic cyclic compound binding (GO:0097159);; Molecular Function: heterocyclic compound binding (GO:1901363);;	--	--	--	--	--	Uncharacterized protein {ECO:0000313|EMBL:CDJ39089.1} OS=Eimeria tenella (Coccidian parasite) PE=4 SV=1	hypothetical protein, conserved [Eimeria tenella]	Eimeria tenella chromosome 1, ordered contigs
EVM0007890	5547.88	-1.1738	0.0627979	-18.6917	5.78159e-78	5.42675e-75	51.8747	51.2476	45.7523	22.2805	21.5743	22.1078	[F]	Nucleotide transport and metabolism	Molecular Function: hydrolase activity (GO:0016787);;	--	[F]	Nucleotide transport and metabolism	5'-nucleotidase, C-terminal domain	Apyrase {ECO:0000303|PubMed:21842387} (Precursor) OS=Aedes albopictus (Asian tiger mosquito) PE=1 SV=1	Nucleotidase, putative {ECO:0000313|EMBL:CDJ43159.1} OS=Eimeria tenella (Coccidian parasite) PE=4 SV=1	nucleotidase, putative [Eimeria tenella]	Hammondia hammondi 5'-nucleotidase, C-terminal domain-containing protein partial mRNA
EVM0006861	7605.29	-1.13591	0.0621104	-18.2885	1.02139e-74	8.52178e-72	150.533	168.524	150.955	74.0194	69.1163	70.6812	--	--	--	--	--	--	--	--	Putative uncharacterized protein {ECO:0000313|EMBL:AET50574.1} OS=Eimeria tenella (Coccidian parasite) PE=2 SV=1	hypothetical protein [Eimeria tenella]	Eimeria tenella clone Etm090C11 hypothetical protein mRNA, complete cds
EVM0003812	2239.78	-1.39487	0.0798944	-17.459	2.94219e-68	2.00844e-65	65.2393	74.2937	62.0309	23.304	26.5661	26.8472	--	--	--	K13845|4.23408e-118|tgo:TGME49_100130|apical membrane antigen, putative; K13845 apical merozoite antigen 1 (A)	--	--	Apical membrane antigen 1	Apical membrane antigen 1, soluble form (Precursor) GN=AMA1 OS=Toxoplasma gondii PE=1 SV=1	Apical membrane antigen, putative {ECO:0000313|EMBL:CDJ36979.1} OS=Eimeria tenella (Coccidian parasite) PE=4 SV=1	apical membrane antigen, putative [Eimeria tenella]	Eimeria tenella invasion-associated protein MA1 (ma-1) mRNA, complete cds
EVM0005910	16330.2	-1.03108	0.0595095	-17.3264	2.97586e-67	1.71891e-64	1006.1	1171.64	1063.6	546.163	508.194	531.464	--	--	--	--	--	--	--	--	Uncharacterized protein {ECO:0000313|EMBL:CDJ37405.1} OS=Eimeria tenella (Coccidian parasite) PE=2 SV=1	hypothetical protein [Eimeria tenella]	Eimeria tenella clone Etm006F11 hypothetical protein mRNA, complete cds
EVM0007490	2243.93	-1.22965	0.074233	-16.5648	1.25293e-61	6.27217e-59	82.0291	86.5341	86.2176	40.9713	33.4047	34.073	--	--	--	--	--	--	--	--	Uncharacterized protein {ECO:0000313|EMBL:CDJ39229.1} OS=Eimeria tenella (Coccidian parasite) PE=4 SV=1	hypothetical protein, conserved [Eimeria tenella]	Toxoplasma gondii ME49 hypothetical protein, conserved, mRNA
EVM0004152	1398	-1.30848	0.0800594	-16.3439	4.80842e-60	2.25665e-57	290.591	280.658	263.94	106.334	118.771	112.797	--	--	--	--	[S]	Function unknown	Uncharacterised protein family (UPF0041)	Mitochondrial pyruvate carrier 1 GN=Mpc1 OS=Drosophila melanogaster (Fruit fly) PE=3 SV=1	Brain protein 44 family protein {ECO:0000313|EMBL:KFG37065.1} OS=Toxoplasma gondii p89 PE=4 SV=1	brain protein 44 family protein [Toxoplasma gondii FOU]	Neospora caninum Liverpool cDNA, FLJ92180, highly similar to Homo sapiens brain protein 44 (BRP44), mRNA, related (NCLIV_050160) mRNA, complete cds
EVM0004491	2590.76	-1.34214	0.0831509	-16.141	1.31494e-58	5.80816e-56	56.8602	70.3028	59.3073	23.4562	24.0584	25.9879	--	--	--	--	--	--	Sporozoite TA4 surface antigen	Sporulated oocyst TA4 antigen 8 kDa subunit (Precursor) OS=Eimeria tenella (Coccidian parasite) PE=1 SV=2	Surface antigen 4 {ECO:0000313|EMBL:CAE52296.1} (Precursor) OS=Eimeria tenella (Coccidian parasite) PE=2 SV=1	surface antigen 4 [Eimeria tenella]	Eimeria tenella clone Etm125D09 hypothetical protein mRNA, complete cds
EVM0005365	2703.85	-1.15811	0.0718059	-16.1283	1.61463e-58	6.73572e-56	53.9415	60.9484	53.6169	24.1384	25.3849	26.0015	--	--	--	--	[RT]	--	p25-alpha	TPPP family protein CG45057 GN=CG45057 OS=Drosophila melanogaster (Fruit fly) PE=2 SV=1	p25-alpha domain-containing protein, putative {ECO:0000313|EMBL:CDJ44980.1} OS=Eimeria tenella (Coccidian parasite) PE=2 SV=1	hypothetical protein [Eimeria tenella]	Eimeria tenella clone Etm007C03 hypothetical protein mRNA, complete cds
EVM0004930	5700.23	-1.16012	0.0721391	-16.0817	3.42623e-58	1.35408e-55	169.001	200.202	181.039	88.7422	74.4922	82.7533	[G]	Carbohydrate transport and metabolism	Molecular Function: magnesium ion binding (GO:0000287);; Molecular Function: pyruvate kinase activity (GO:0004743);; Molecular Function: ATP binding (GO:0005524);; Biological Process: glycolytic process (GO:0006096);; Biological Process: phosphorylation (GO:0016310);; Molecular Function: potassium ion binding (GO:0030955);;	K00873|0|tgo:TGME49_056760|pyruvate kinase, putative (EC:2.7.1.40); K00873 pyruvate kinase [EC:2.7.1.40] (A)	[G]	Carbohydrate transport and metabolism	Pyruvate kinase, barrel domain	Pyruvate kinase GN=PYK OS=Eimeria tenella (Coccidian parasite) PE=2 SV=1	Pyruvate kinase {ECO:0000256|RuleBase:RU000504} OS=Eimeria tenella (Coccidian parasite) PE=3 SV=1	RecName: Full=Pyruvate kinase; Short=PK [Eimeria tenella]	Eimeria tenella clone Etm006D11 hypothetical protein mRNA, complete cds
EVM0007351	3049.54	-1.03762	0.0658741	-15.7516	6.69887e-56	2.39533e-53	132.779	148.545	151.127	71.2898	66.9084	72.2036	--	--	--	--	--	--	--	--	Uncharacterized protein {ECO:0000313|EMBL:CDJ41303.1} OS=Eimeria tenella (Coccidian parasite) PE=4 SV=1	hypothetical protein, conserved [Eimeria tenella]	Eimeria tenella clone Etm122B09 hypothetical protein mRNA, complete cds
EVM0007060	1162.35	-1.37765	0.0894729	-15.3974	1.70387e-53	5.33098e-51	83.3126	84.9476	78.0373	36.0785	30.0371	28.5789	--	--	--	--	--	--	--	--	SAG family member {ECO:0000313|EMBL:CDJ37354.1} OS=Eimeria tenella (Coccidian parasite) PE=4 SV=1	SAG family member [Eimeria tenella]	--
EVM0000398	1743.1	-1.34509	0.0883212	-15.2295	2.25284e-52	6.76662e-50	47.5002	56.0879	50.8342	19.607	22.0366	19.404	--	--	--	--	--	--	Sporozoite TA4 surface antigen	Sporulated oocyst TA4 antigen 8 kDa subunit (Precursor) OS=Eimeria tenella (Coccidian parasite) PE=1 SV=2	SAG family member {ECO:0000313|EMBL:CDJ41971.1} OS=Eimeria tenella (Coccidian parasite) PE=4 SV=1	SAG family member [Eimeria tenella]	Eimeria tenella surface antigen 2 mRNA, complete cds
EVM0006436	2060.23	-1.02304	0.0698126	-14.6541	1.2684e-48	3.1748e-46	39.9299	39.5254	39.8082	17.9863	19.5179	21.1515	--	--	--	--	--	--	Uncharacterized ACR, COG1678	--	Uncharacterized protein {ECO:0000313|EMBL:CDJ43236.1} OS=Eimeria tenella (Coccidian parasite) PE=4 SV=1	hypothetical protein, conserved [Eimeria tenella]	PREDICTED: Harpegnathos saltator uncharacterized LOC105188601 (LOC105188601), mRNA
EVM0005547	2183.26	-1.15769	0.0830006	-13.948	3.2368e-44	6.23208e-42	54.7074	60.202	52.3076	26.0855	22.3589	26.2937	--	--	--	--	--	--	Sporozoite TA4 surface antigen	Sporulated oocyst TA4 antigen 8 kDa subunit (Precursor) OS=Eimeria tenella (Coccidian parasite) PE=1 SV=2	SAG family member {ECO:0000313|EMBL:CDJ62346.1} OS=Eimeria necatrix PE=4 SV=1	SAG family member [Eimeria necatrix]	Eimeria tenella mRNA for surface antigen 9 (sag9 gene)
EVM0002229	2109.32	-1.06441	0.0783119	-13.5919	4.47367e-42	7.81228e-40	112.384	108.72	122.336	56.62	50.2007	57.0108	--	--	--	--	--	--	Sporozoite TA4 surface antigen	Sporulated oocyst TA4 antigen 8 kDa subunit (Precursor) OS=Eimeria tenella (Coccidian parasite) PE=1 SV=2	SAG family member {ECO:0000313|EMBL:CDJ40610.1} OS=Eimeria tenella (Coccidian parasite) PE=4 SV=1	SAG family member [Eimeria tenella]	Eimeria tenella clone Etm039H03 hypothetical protein mRNA, complete cds
EVM0000496	1582.17	-1.09614	0.0807658	-13.5718	5.88462e-42	1.00426e-39	67.5926	71.3345	63.0071	30.6217	29.8872	33.7537	--	--	--	--	--	--	Sporozoite TA4 surface antigen	Sporulated oocyst TA4 antigen 8 kDa subunit (Precursor) OS=Eimeria tenella (Coccidian parasite) PE=1 SV=2	SAG family member {ECO:0000313|EMBL:CDJ40619.1} OS=Eimeria tenella (Coccidian parasite) PE=4 SV=1	SAG family member [Eimeria tenella]	Eimeria tenella mRNA for surface antigen 9 (sag9 gene)
EVM0000609	661.569	-1.45586	0.109984	-13.237	5.36365e-40	8.95015e-38	43.9784	48.903	44.1617	17.3672	16.5088	16.0849	--	--	--	--	--	--	Protein of unknown function (DUF3273)	--	Multi-pass transmembrane protein, related {ECO:0000313|EMBL:CDJ40719.1} OS=Eimeria tenella (Coccidian parasite) PE=4 SV=1	Multi-pass transmembrane protein, related [Eimeria tenella]	Eimeria tenella clone Etm026D01 hypothetical protein mRNA, complete cds
EVM0005039	2053.97	-1.00059	0.075753	-13.2086	7.82955e-40	1.27809e-37	231.593	231.383	221.571	101.403	119.279	121.763	--	--	--	--	--	--	--	--	--	--	Eimeria tenella clone Etm014A05 hypothetical protein mRNA, complete cds
EVM0005140	22101.8	-1.04067	0.0791223	-13.1526	1.64353e-39	2.5711e-37	605.406	584.616	532.807	285.542	278.504	273.429	--	--	--	--	--	--	Sporozoite TA4 surface antigen	Sporulated oocyst TA4 antigen 8 kDa subunit (Precursor) OS=Eimeria tenella (Coccidian parasite) PE=1 SV=2	SAG family member {ECO:0000313|EMBL:CDJ40617.1} OS=Eimeria tenella (Coccidian parasite) PE=4 SV=1	SAG family member [Eimeria tenella]	Eimeria tenella clone Etm041A07 hypothetical protein mRNA, complete cds
EVM0001686	2142.45	-1.03319	0.0789405	-13.0881	3.84883e-39	5.66683e-37	103.698	119.705	110.91	53.9729	53.2602	56.0302	--	--	--	--	--	--	Sporozoite TA4 surface antigen	Sporulated oocyst TA4 antigen 8 kDa subunit (Precursor) OS=Eimeria tenella (Coccidian parasite) PE=1 SV=2	SAG family member {ECO:0000313|EMBL:CDJ40608.1} OS=Eimeria tenella (Coccidian parasite) PE=4 SV=1	SAG family member [Eimeria tenella]	Eimeria tenella clone Etm039H03 hypothetical protein mRNA, complete cds
EVM0008279	519.504	-1.37984	0.10585	-13.0359	7.65e-39	1.10469e-36	24.0242	25.1039	26.9979	10.005	10.3068	9.03633	--	--	--	--	--	--	Sporozoite TA4 surface antigen	Sporulated oocyst TA4 antigen 8 kDa subunit (Precursor) OS=Eimeria tenella (Coccidian parasite) PE=1 SV=2	SAG family member {ECO:0000313|EMBL:CDJ41997.1} OS=Eimeria tenella (Coccidian parasite) PE=4 SV=1	SAG family member [Eimeria tenella]	Eimeria tenella clone Etm031F01 hypothetical protein mRNA, complete cds
EVM0001298	2500.32	-1.09858	0.0845642	-12.991	1.37558e-38	1.91281e-36	51.4345	50.5921	42.98	23.1029	22.4863	22.1271	--	--	--	--	--	--	--	--	Uncharacterized protein {ECO:0000313|EMBL:CDJ40983.1} OS=Eimeria tenella (Coccidian parasite) PE=4 SV=1	hypothetical protein, conserved [Eimeria tenella]	--
EVM0002943	921.029	-1.37613	0.111107	-12.3856	3.12626e-35	3.7262e-33	17.2625	21.7806	16.8059	6.42871	6.78751	8.24424	--	--	--	--	[S]	Function unknown	Domain of unknown function (DUF3437)	--	Uncharacterized protein {ECO:0000313|EMBL:CDJ67444.1} OS=Eimeria necatrix PE=4 SV=1	hypothetical protein, conserved [Eimeria necatrix]	Salpingoeca sp. ATCC 50818 hypothetical protein (PTSG_12077) mRNA, complete cds
EVM0002065	1313.47	1.01035	0.0816491	12.3743	3.59879e-35	4.15405e-33	8.9729	7.2723	8.53685	16.7992	16.9844	16.1376	--	--	--	--	--	--	--	--	Uncharacterized protein {ECO:0000313|EMBL:CDJ38990.1} OS=Eimeria tenella (Coccidian parasite) PE=4 SV=1	hypothetical protein, conserved [Eimeria tenella]	--
EVM0004973	537.366	-1.5288	0.123645	-12.3644	4.07305e-35	4.56485e-33	7.95384	10.6284	8.7937	2.79269	3.11013	3.57201	--	--	Molecular Function: catalytic activity (GO:0003824);;	--	[R]	General function prediction only	Guanylate-binding protein, N-terminal domain	--	Guanylate binding protein, putative {ECO:0000313|EMBL:CDJ43216.1} OS=Eimeria tenella (Coccidian parasite) PE=4 SV=1	guanylate binding protein, putative [Eimeria tenella]	--
EVM0007053	1227.59	-1.0235	0.0847677	-12.0741	1.44678e-33	1.53012e-31	53.8886	56.8144	49.7545	28.2596	23.9302	26.4688	--	--	--	--	--	--	PUB domain	--	Uncharacterized protein {ECO:0000313|EMBL:CDJ43460.1} OS=Eimeria tenella (Coccidian parasite) PE=2 SV=1	hypothetical protein [Eimeria tenella]	Eimeria tenella clone Etm110H09 hypothetical protein mRNA, complete cds
EVM0006369	1310.14	-1.213	0.100571	-12.0611	1.69418e-33	1.76689e-31	12.7269	16.6507	13.7221	6.09243	6.14609	6.35171	--	--	--	--	--	--	--	--	Uncharacterized protein {ECO:0000313|EMBL:CDJ67444.1} OS=Eimeria necatrix PE=4 SV=1	hypothetical protein, conserved [Eimeria necatrix]	Eimeria tenella chromosome 1, ordered contigs
EVM0004924	503.001	-1.39611	0.116918	-11.941	7.23415e-33	7.44127e-31	21.0495	23.537	21.704	9.09902	8.901	7.27087	--	--	--	--	--	--	Protein of unknown function (DUF3273)	--	Uncharacterized protein {ECO:0000313|EMBL:CDJ42109.1} OS=Eimeria tenella (Coccidian parasite) PE=4 SV=1	hypothetical protein ETH_00004135 [Eimeria tenella]	Toxoplasma gondii cDNA, clone: XTG05421.2, full cDNA, XTG Sugano cDNA library
EVM0005649	617.79	-1.30134	0.109941	-11.8368	2.51865e-32	2.52168e-30	11.0881	11.263	10.908	3.9901	4.75285	4.77847	--	--	--	--	--	--	--	--	Uncharacterized protein {ECO:0000313|EMBL:CDJ37352.1} OS=Eimeria tenella (Coccidian parasite) PE=4 SV=1	hypothetical protein, conserved [Eimeria tenella]	Eimeria tenella clone Etm041E11 hypothetical protein mRNA, complete cds
EVM0000950	902.497	-1.51749	0.129732	-11.697	1.3197e-31	1.22341e-29	12.3162	15.8821	12.5777	4.09059	3.94374	6.09033	--	--	--	--	[O]	Posttranslational modification, protein turnover, chaperones	FHA domain	Uncharacterized RING finger protein T02C1.1 GN=T02C1.1 OS=Caenorhabditis elegans PE=3 SV=1	Zinc finger (C3HC4 type) / FHA domain-containing protein, putative {ECO:0000313|EMBL:CDJ68656.1} (Fragment) OS=Eimeria necatrix PE=4 SV=1	zinc finger (C3HC4 type) / FHA domain-containing protein, putative, partial [Eimeria necatrix]	Toxoplasma gondii ME49 zinc finger (C3HC4 type) / FHA domain-containing protein, mRNA
EVM0005727	735.258	-1.0216	0.0894602	-11.4197	3.33559e-30	2.81427e-28	45.5961	46.6268	46.2912	21.4579	22.1835	24.472	--	--	--	--	[U]	Intracellular trafficking, secretion, and vesicular transport	PRA1 family protein	--	Uncharacterized protein {ECO:0000313|EMBL:CDJ38026.1} OS=Eimeria tenella (Coccidian parasite) PE=4 SV=1	hypothetical protein, conserved [Eimeria tenella]	--
EVM0002262	1240.42	-1.09417	0.0970025	-11.2798	1.65029e-29	1.36177e-27	230.098	239.904	226.208	129.059	104.194	92.7868	--	--	--	--	[V]	Defense mechanisms	Macrophage migration inhibitory factor (MIF)	Macrophage migration inhibitory factor homolog OS=Brugia malayi (Filarial nematode worm) PE=3 SV=4	Macrophage migration inhibitory factor {ECO:0000313|EMBL:ABC73371.1} OS=Eimeria tenella (Coccidian parasite) PE=2 SV=1	macrophage migration inhibitory factor [Eimeria tenella]	Eimeria tenella macrophage migration inhibitory factor (MIF) mRNA, complete cds
EVM0003353	285.15	-2.0337	0.180944	-11.2394	2.61086e-29	2.10806e-27	10.6777	11.6798	10.9569	2.92596	3.14851	2.11413	--	--	--	--	--	--	--	--	56 kDa gametocyte antigen, related {ECO:0000313|EMBL:CDJ41536.1} OS=Eimeria tenella (Coccidian parasite) PE=4 SV=1	56 kDa gametocyte antigen, related [Eimeria tenella]	Eimeria maxima 56 kDa gametocyte antigen (gam56) mRNA, complete cds
EVM0001263	1198.88	1.08506	0.102727	10.5626	4.44321e-26	3.00577e-24	38.8394	31.2965	34.1994	78.4243	79.2732	63.7613	--	--	--	--	--	--	--	--	Uncharacterized protein {ECO:0000313|EMBL:CDJ44055.1} OS=Eimeria tenella (Coccidian parasite) PE=4 SV=1	hypothetical protein, conserved [Eimeria tenella]	--
EVM0006890	735.286	-1.05121	0.0995921	-10.5552	4.80665e-26	3.16606e-24	7.13981	6.45922	6.84477	3.1876	2.9703	3.66006	--	--	--	--	--	--	--	--	Uncharacterized protein {ECO:0000313|EMBL:CDJ42742.1} OS=Eimeria tenella (Coccidian parasite) PE=4 SV=1	hypothetical protein, conserved [Eimeria tenella]	Eimeria tenella chromosome 1, ordered contigs
EVM0006677	1717.62	1.25233	0.119363	10.4918	9.42343e-26	6.10005e-24	58.3989	41.2603	48.0695	128.063	129.404	94.5582	--	--	--	--	--	--	--	--	Uncharacterized protein {ECO:0000313|EMBL:CDJ42829.1} OS=Eimeria tenella (Coccidian parasite) PE=4 SV=1	hypothetical protein, conserved [Eimeria tenella]	--
EVM0005089	1457.83	1.0137	0.0967947	10.4726	1.15368e-25	7.40427e-24	23.4948	19.07	20.1514	45.4556	44.0063	37.2085	--	--	--	K15279|1.20121e-25|cho:Chro.80162|hypothetical protein; K15279 solute carrier family 35 (GDP-fucose transporter), member C1 (A)	[GOU]	--	Triose-phosphate Transporter family	GDP-fucose transporter 1 GN=slc35c1 OS=Dictyostelium discoideum (Slime mold) PE=3 SV=1	GDP-fucose transporter 1, putative {ECO:0000313|EMBL:CDJ42112.1} OS=Eimeria tenella (Coccidian parasite) PE=4 SV=1	GDP-fucose transporter 1, putative [Eimeria tenella]	--
EVM0000385	561.413	-1.46205	0.140483	-10.4073	2.29539e-25	1.41464e-23	15.494	18.2644	15.6286	5.5727	5.88478	6.45576	--	--	--	--	--	--	--	--	Uncharacterized protein {ECO:0000313|EMBL:CDJ41780.1} OS=Eimeria tenella (Coccidian parasite) PE=4 SV=1	hypothetical protein, conserved [Eimeria tenella]	--
EVM0007970	1108.09	-1.02041	0.098569	-10.3522	4.09008e-25	2.43749e-23	6.09611	7.01397	6.69688	3.42464	3.11378	3.21756	--	--	--	--	--	--	--	--	--	--	Gongylonema pulchrum genome assembly G_pulchrum_Hokkaido ,scaffold GPUH_scaffold0007125
EVM0001505	899.066	-1.0412	0.106781	-9.75077	1.83075e-22	8.98506e-21	15.2118	17.6266	13.7852	7.76074	6.7624	8.05376	--	--	--	--	--	--	--	--	Uncharacterized protein {ECO:0000313|EMBL:CDJ38133.1} OS=Eimeria tenella (Coccidian parasite) PE=4 SV=1	hypothetical protein, conserved [Eimeria tenella]	--
EVM0004766	581.191	1.01234	0.105884	9.56079	1.16865e-21	5.31841e-20	9.98241	8.24244	8.70439	19.1911	18.3269	16.8073	--	--	--	--	--	--	--	--	Uncharacterized protein {ECO:0000313|EMBL:CDJ42878.1} OS=Eimeria tenella (Coccidian parasite) PE=4 SV=1	hypothetical protein, conserved [Eimeria tenella]	--
EVM0005857	233.935	1.32163	0.13959	9.46788	2.85582e-21	1.26143e-19	5.25335	4.69695	4.92243	12.7078	10.8527	13.5084	--	--	--	--	--	--	--	--	Uncharacterized protein {ECO:0000313|EMBL:CDJ37548.1} OS=Eimeria tenella (Coccidian parasite) PE=4 SV=1	hypothetical protein, conserved [Eimeria tenella]	--
EVM0003687	500.254	-1.13769	0.121855	-9.33643	9.96365e-21	4.13354e-19	34.134	38.5248	30.3265	17.1347	15.724	13.999	[R]	General function prediction only	Biological Process: fatty acid metabolic process (GO:0006631);; Molecular Function: oxidoreductase activity (GO:0016491);;	--	[R]	General function prediction only	Aldo/keto reductase family	Prostaglandin F synthase GN=Tc00.1047053511287.49 OS=Trypanosoma cruzi (strain CL Brener) PE=1 SV=2	Aldo/keto reductase family oxidoreductase, putative {ECO:0000313|EMBL:CDJ45355.1} OS=Eimeria tenella (Coccidian parasite) PE=4 SV=1	aldo/keto reductase family oxidoreductase, putative [Eimeria tenella]	Toxoplasma gondii ME49 aldo/keto reductase family oxidoreductase, putative, mRNA
EVM0001364	2360.47	1.02437	0.109831	9.32678	1.09132e-20	4.478e-19	51.6017	37.4155	40.6157	96.0729	96.2011	71.4788	--	--	--	--	--	--	--	--	Uncharacterized protein {ECO:0000313|EMBL:CDJ41765.1} OS=Eimeria tenella (Coccidian parasite) PE=4 SV=1	hypothetical protein, conserved [Eimeria tenella]	--
EVM0003273	494.411	1.37939	0.149508	9.22619	2.80418e-20	1.09101e-18	81.2046	52.0497	57.9258	186.156	168.035	143.103	#N/A	#N/A	#N/A	#N/A	#N/A	#N/A	#N/A	#N/A	#N/A	#N/A	#N/A
EVM0003072	424.418	-1.28135	0.140046	-9.14944	5.72284e-20	2.21509e-18	18.7555	19.8602	17.5202	5.86132	7.32871	9.81994	--	--	--	--	--	--	Sporozoite TA4 surface antigen	Sporulated oocyst TA4 antigen 8 kDa subunit (Precursor) OS=Eimeria tenella (Coccidian parasite) PE=1 SV=2	SAG family member {ECO:0000313|EMBL:CDJ41978.1} OS=Eimeria tenella (Coccidian parasite) PE=4 SV=1	SAG family member [Eimeria tenella]	Eimeria tenella mRNA for surface antigen 3 (sag3 gene)
EVM0005759	446.435	-1.05896	0.116278	-9.10721	8.45257e-20	3.204e-18	11.4129	11.8304	10.2883	5.48554	5.07441	5.50082	--	--	--	--	--	--	Protein of unknown function (DUF3273)	--	Uncharacterized protein {ECO:0000313|EMBL:CDJ45528.1} OS=Eimeria tenella (Coccidian parasite) PE=4 SV=1	hypothetical protein, conserved [Eimeria tenella]	Hammondia hammondi multi-pass transmembrane protein partial mRNA
EVM0006295	423.922	-1.07878	0.119425	-9.03308	1.66899e-19	6.02522e-18	11.6099	11.3763	11.3904	5.04171	5.96934	5.34431	--	--	Molecular Function: hydrolase activity (GO:0016787);;	K05610|4.09055e-98|tgo:TGME49_047240|ubiquitin carboxyl-terminal hydrolase isozyme L5, putative (EC:3.4.19.12); K05610 ubiquitin carboxyl-terminal hydrolase L5 [EC:3.4.19.12] (A)	[O]	Posttranslational modification, protein turnover, chaperones	Ubiquitin carboxyl-terminal hydrolase, family 1	Ubiquitin carboxyl-terminal hydrolase isozyme L5 GN=uch2 OS=Dictyostelium discoideum (Slime mold) PE=3 SV=1	Ubiquitin carboxyl-terminal hydrolase {ECO:0000256|RuleBase:RU361215} OS=Eimeria acervulina (Coccidian parasite) PE=3 SV=1	ubiquitin carboxyl-terminal hydrolase isozyme L5, putative [Eimeria acervulina]	Neospora caninum Liverpool hypothetical protein (NCLIV_063760) mRNA, complete cds
EVM0005810	581.363	-1.0817	0.12012	-9.00516	2.15358e-19	7.62796e-18	31.7507	34.9288	33.1618	14.0769	16.1343	16.9917	--	--	--	--	--	--	--	--	Uncharacterized protein {ECO:0000313|EMBL:CDJ37349.1} OS=Eimeria tenella (Coccidian parasite) PE=4 SV=1	hypothetical protein, conserved [Eimeria tenella]	--
EVM0007015	214.871	1.45123	0.16232	8.94051	3.87363e-19	1.32214e-17	3.50335	2.67004	3.24098	8.16059	8.43466	9.12387	--	--	--	--	--	--	--	--	Uncharacterized protein {ECO:0000313|EMBL:CDJ40284.1} OS=Eimeria tenella (Coccidian parasite) PE=4 SV=1	hypothetical protein, conserved [Eimeria tenella]	--
EVM0004442	413.74	-1.34944	0.151281	-8.92008	4.65941e-19	1.58314e-17	12.1981	11.7163	12.4056	4.91999	5.25328	4.18065	--	--	--	--	--	--	Sporozoite TA4 surface antigen	Sporulated oocyst TA4 antigen 8 kDa subunit (Precursor) OS=Eimeria tenella (Coccidian parasite) PE=1 SV=2	SAG family member {ECO:0000313|EMBL:CDJ41972.1} OS=Eimeria tenella (Coccidian parasite) PE=4 SV=1	SAG family member [Eimeria tenella]	Eimeria tenella mRNA for surface antigen 2 (sag2 gene)
EVM0008201	423.38	1.17218	0.134394	8.72195	2.73443e-18	8.70035e-17	8.91656	6.52194	9.13516	18.5332	19.1804	17.6651	--	--	--	--	--	--	Major Facilitator Superfamily	--	Uncharacterized protein {ECO:0000313|EMBL:CDJ38208.1} OS=Eimeria tenella (Coccidian parasite) PE=4 SV=1	hypothetical protein ETH_00009430 [Eimeria tenella]	Hammondia hammondi transporter, major facilitator family protein partial mRNA
EVM0006288	215.109	-1.3645	0.157155	-8.68248	3.87231e-18	1.20652e-16	11.7269	9.0736	9.99368	3.87988	4.03265	4.04696	--	--	--	K05293|5.66608e-79|tgo:TGME49_077570|GPI transamidase subunit PIG-U, putative; K05293 phosphatidylinositol glycan, class U (A)	--	--	--	--	Uncharacterized protein {ECO:0000313|EMBL:CDJ41637.1} OS=Eimeria tenella (Coccidian parasite) PE=4 SV=1	hypothetical protein, conserved [Eimeria tenella]	--
EVM0006123	471.106	-1.20011	0.138795	-8.64666	5.30284e-18	1.62527e-16	11.1791	12.3745	11.8638	4.97839	4.80312	5.59061	--	--	--	--	--	--	--	--	Uncharacterized protein {ECO:0000313|EMBL:CDJ42574.1} OS=Eimeria tenella (Coccidian parasite) PE=4 SV=1	hypothetical protein, conserved [Eimeria tenella]	Eimeria maxima imp-1 gene for immune mapped protein 1, exons 1-4, strain Weybridge, clone EmaxBAC2k08
EVM0000363	184.737	-1.73653	0.208661	-8.32226	8.63005e-17	2.30616e-15	10.6268	11.5413	10.7917	3.72897	4.34136	1.93711	--	--	--	--	--	--	Sporozoite TA4 surface antigen	Sporulated oocyst TA4 antigen 8 kDa subunit (Precursor) OS=Eimeria tenella (Coccidian parasite) PE=1 SV=2	SAG family member {ECO:0000313|EMBL:CDJ39898.1} OS=Eimeria tenella (Coccidian parasite) PE=4 SV=1	SAG family member [Eimeria tenella]	Drosophila persimilis GL14808 (Dper\GL14808), mRNA
EVM0005295	446.999	-1.02596	0.126243	-8.12691	4.40384e-16	1.09862e-14	47.3104	60.2821	48.8244	23.3637	24.1838	29.0875	--	--	--	--	--	--	--	--	Uncharacterized protein {ECO:0000313|EMBL:CDJ43658.1} OS=Eimeria tenella (Coccidian parasite) PE=4 SV=1	hypothetical protein ETH_00015600 [Eimeria tenella]	Haliotis discus hannai clone CHh475 microsatellite sequence
EVM0005215	556.825	1.10351	0.13644	8.08791	6.06986e-16	1.4895e-14	12.0164	7.13283	9.41848	21.4468	21.2054	18.7269	--	--	--	--	--	--	RIC1	--	Uncharacterized protein {ECO:0000313|EMBL:CDJ40142.1} OS=Eimeria tenella (Coccidian parasite) PE=4 SV=1	hypothetical protein ETH_00012150 [Eimeria tenella]	--
EVM0002373	138.372	1.89639	0.234677	8.08087	6.43045e-16	1.56774e-14	1.24154	0.806046	0.602969	3.74461	2.99975	3.10897	--	--	--	--	--	--	--	--	Uncharacterized protein {ECO:0000313|EMBL:CDJ42446.1} OS=Eimeria tenella (Coccidian parasite) PE=4 SV=1	hypothetical protein [Eimeria tenella strain Houghton]	Eimeria tenella hypothetical protein (e2017b09.tmp0041) mRNA, complete cds
EVM0006651	474.94	-1.07892	0.13449	-8.02228	1.03798e-15	2.46651e-14	23.2434	25.4416	19.7482	9.94517	8.79215	13.4466	--	--	--	--	--	--	--	--	--	--	Drosophila melanogaster chromosome 3R
EVM0002321	414.549	-1.08683	0.135605	-8.01467	1.10436e-15	2.60774e-14	7.92038	8.8109	8.15362	3.52547	3.09262	4.98898	--	--	--	--	--	--	--	--	Uncharacterized protein {ECO:0000313|EMBL:CDJ37057.1} OS=Eimeria tenella (Coccidian parasite) PE=4 SV=1	hypothetical protein, conserved [Eimeria tenella]	Drosophila grimshawi GH12867 (Dgri\GH12867), mRNA
EVM0004625	256.336	-1.53703	0.192714	-7.97572	1.5149e-15	3.5218e-14	7.15527	4.94389	6.82994	2.74916	1.65282	2.06776	[P]	Inorganic ion transport and metabolism	Molecular Function: hydrolase activity (GO:0016787);;	--	[P]	Inorganic ion transport and metabolism	--	--	Copper-transporting ATPase, putative {ECO:0000313|EMBL:CDJ42575.1} OS=Eimeria tenella (Coccidian parasite) PE=3 SV=1	copper-transporting ATPase, putative [Eimeria tenella]	Eimeria tenella chromosome 1, ordered contigs
EVM0007130	266.602	-1.15406	0.144777	-7.97127	1.57047e-15	3.61737e-14	22.0489	23.5077	19.4204	10.6771	9.36621	9.13089	--	--	--	--	--	--	--	--	Uncharacterized protein {ECO:0000313|EMBL:CDJ37527.1} OS=Eimeria tenella (Coccidian parasite) PE=4 SV=1	hypothetical protein, conserved [Eimeria tenella]	Toxoplasma gondii ME49 hypothetical protein, mRNA
EVM0003069	339.174	-1.00596	0.129073	-7.79375	6.50513e-15	1.41586e-13	6.69627	6.31521	6.74709	3.01197	3.33928	3.48791	--	--	--	--	--	--	--	--	Uncharacterized protein {ECO:0000313|EMBL:CDJ37057.1} OS=Eimeria tenella (Coccidian parasite) PE=4 SV=1	hypothetical protein, conserved [Eimeria tenella]	Drosophila mojavensis GI14833 (Dmoj\GI14833), mRNA
EVM0006264	241.156	-1.18388	0.152428	-7.76681	8.049e-15	1.73678e-13	11.8371	12.0705	13.3996	4.49915	6.83891	5.24185	--	--	--	--	--	--	--	--	Uncharacterized protein {ECO:0000313|EMBL:CDJ38465.1} OS=Eimeria tenella (Coccidian parasite) PE=4 SV=1	hypothetical protein, conserved [Eimeria tenella]	Hammondia hammondi hypothetical protein partial mRNA
EVM0000212	318.815	1.11116	0.147774	7.5193	5.5069e-14	1.07406e-12	1.00102	0.92264	0.920617	2.07716	1.82445	2.23323	--	--	--	--	--	--	--	--	HECT type ubiquitin ligase, putative {ECO:0000313|EMBL:CDJ42652.1} OS=Eimeria tenella (Coccidian parasite) PE=4 SV=1	HECT type ubiquitin ligase, putative [Eimeria tenella]	Eimeria tenella chromosome 1, ordered contigs
EVM0007239	240.028	1.22171	0.164265	7.43743	1.02665e-13	1.93696e-12	4.11874	2.70451	2.77176	7.04095	6.90755	8.39219	--	--	--	--	--	--	--	--	AGAP004734-PA, related {ECO:0000313|EMBL:CDJ37760.1} OS=Eimeria tenella (Coccidian parasite) PE=4 SV=1	AGAP004734-PA, related [Eimeria tenella]	--
EVM0004767	192.565	1.05565	0.148291	7.11874	1.08917e-12	1.84202e-11	4.23917	3.90408	4.78757	9.54024	8.3834	8.9146	--	--	--	--	--	--	--	--	Uncharacterized protein {ECO:0000313|EMBL:CDJ37773.1} OS=Eimeria tenella (Coccidian parasite) PE=4 SV=1	hypothetical protein, conserved [Eimeria tenella]	--
EVM0005444	120.261	-1.54681	0.218164	-7.09015	1.33971e-12	2.24051e-11	7.00048	5.16373	6.81319	2.26842	2.62873	1.66705	--	--	--	--	--	--	--	--	Uncharacterized protein {ECO:0000313|EMBL:CDJ41918.1} OS=Eimeria tenella (Coccidian parasite) PE=4 SV=1	hypothetical protein, conserved [Eimeria tenella]	--
EVM0007962	286.489	-1.07925	0.153799	-7.01728	2.26221e-12	3.66889e-11	3.77202	5.25565	4.40123	1.99592	2.26078	2.12526	--	--	--	--	--	--	Casein kinase substrate phosphoprotein PP28	--	Uncharacterized protein {ECO:0000313|EMBL:CDJ38520.1} OS=Eimeria tenella (Coccidian parasite) PE=4 SV=1	hypothetical protein ETH_00024945 [Eimeria tenella]	Spirometra erinaceieuropaei genome assembly S_erinaceieuropaei ,scaffold SPER_scaffold0085606
EVM0006921	295.776	1.22248	0.176561	6.9238	4.39689e-12	6.86408e-11	3.96859	2.50153	2.51607	7.72142	7.65772	5.60751	--	--	--	K13849|3.74783e-07|pfa:PF13_0198|PfRh2a; reticulocyte binding protein 2 homolog A; K13849 reticulocyte-binding protein (A)	--	--	--	Reticulocyte-binding protein 2 homolog a {ECO:0000312|EMBL:CAD52492.1} GN=PF13_0198 OS=Plasmodium falciparum (isolate 3D7) PE=3 SV=1	Uncharacterized protein {ECO:0000313|EMBL:CDJ42108.1} OS=Eimeria tenella (Coccidian parasite) PE=4 SV=1	hypothetical protein, conserved [Eimeria tenella]	--
EVM0006279	204.243	1.1371	0.164495	6.91267	4.75612e-12	7.34851e-11	7.93761	9.31836	8.6313	20.6026	18.9703	17.3922	--	--	--	--	--	--	TLC domain	--	Uncharacterized protein {ECO:0000313|EMBL:CDJ42653.1} OS=Eimeria tenella (Coccidian parasite) PE=4 SV=1	hypothetical protein, conserved [Eimeria tenella]	--
EVM0007372	5100.54	1.05093	0.152433	6.8944	5.40912e-12	8.2892e-11	163.739	113.58	129.972	299.146	311.773	232.99	--	--	--	--	--	--	--	--	Uncharacterized protein {ECO:0000313|EMBL:CDJ43115.1} OS=Eimeria tenella (Coccidian parasite) PE=4 SV=1	hypothetical protein, conserved [Eimeria tenella]	--
EVM0002565	155.875	-1.27636	0.185953	-6.86388	6.70169e-12	1.01458e-10	5.318	5.38557	7.00775	2.32104	3.01674	2.05182	--	--	--	--	[G]	Carbohydrate transport and metabolism	Fringe-like	--	Galactosyltransferase, related, related {ECO:0000313|EMBL:CDJ40491.1} OS=Eimeria tenella (Coccidian parasite) PE=4 SV=1	Galactosyltransferase, related, related [Eimeria tenella]	--
EVM0005556	157.82	1.11856	0.165316	6.76621	1.32198e-11	1.93882e-10	2.50388	2.57677	2.81426	6.35834	4.90572	5.83449	--	--	--	--	--	--	--	--	Uncharacterized protein {ECO:0000313|EMBL:CDJ41825.1} OS=Eimeria tenella (Coccidian parasite) PE=4 SV=1	hypothetical protein, conserved [Eimeria tenella]	Plasmodium falciparum 3D7 chromosome 12, complete sequence
EVM0000344	118.4	-1.35686	0.20166	-6.72842	1.71519e-11	2.48157e-10	8.50349	10.6369	12.1339	3.92566	4.64028	3.7326	--	--	--	--	--	--	--	--	Uncharacterized protein {ECO:0000313|EMBL:CDJ41371.1} OS=Eimeria tenella (Coccidian parasite) PE=4 SV=1	hypothetical protein, conserved [Eimeria tenella]	--
EVM0008174	96.2943	-1.52365	0.237712	-6.40966	1.45849e-10	1.86573e-09	10.5788	9.91511	8.52739	2.6173	4.5559	3.10035	--	--	--	--	--	--	--	--	--	--	Spirometra erinaceieuropaei genome assembly S_erinaceieuropaei ,scaffold SPER_contig0051773
EVM0000920	151.388	-1.34675	0.211251	-6.37515	1.8279e-10	2.31072e-09	11.3539	14.1197	13.8385	5.93123	3.48129	5.75738	--	--	--	--	--	--	--	--	--	--	Drosophila melanogaster SNS (sns) mRNA, complete cds
EVM0005171	42.2153	-2.54088	0.399354	-6.36247	1.98537e-10	2.49301e-09	1.157	2.14684	1.74357	0.355906	0.127659	0.355575	--	--	--	--	--	--	--	--	Uncharacterized protein {ECO:0000313|EMBL:CDJ44141.1} OS=Eimeria tenella (Coccidian parasite) PE=4 SV=1	hypothetical protein, conserved [Eimeria tenella]	Drosophila willistoni GK19787 (Dwil\GK19787), mRNA
EVM0003281	59.1479	-1.90116	0.301042	-6.31527	2.69682e-10	3.33615e-09	1.75439	1.89286	1.71245	0.346965	0.700042	0.426533	--	--	--	--	--	--	--	Probable cubilin (Precursor) GN=ZC116.3 OS=Caenorhabditis elegans PE=1 SV=4	ADR200Cp, related {ECO:0000313|EMBL:CDJ52844.1} OS=Eimeria brunetti PE=4 SV=1	ADR200Cp, related [Eimeria brunetti]	Eimeria tenella chromosome 1, ordered contigs
EVM0000541	275.224	-1.02564	0.162798	-6.30008	2.97499e-10	3.63831e-09	6.49008	7.81774	5.76482	3.45609	4.03533	2.47276	[M]	Cell wall/membrane/envelope biogenesis	Biological Process: fucose metabolic process (GO:0006004);; Molecular Function: lyase activity (GO:0016829);; Biological Process: cellular metabolic process (GO:0044237);;	K01711|5.15826e-159|tgo:TGME49_038940|GDP-mannose 4,6 dehydratase, putative (EC:4.2.1.47); K01711 GDPmannose 4,6-dehydratase [EC:4.2.1.47] (A)	[G]	Carbohydrate transport and metabolism	NAD dependent epimerase/dehydratase family	GDP-mannose 4,6 dehydratase GN=Gmd OS=Drosophila melanogaster (Fruit fly) PE=1 SV=2	GDP-mannose 4,6 dehydratase, putative {ECO:0000313|EMBL:CDJ37600.1} OS=Eimeria tenella (Coccidian parasite) PE=3 SV=1	GDP-mannose 4,6 dehydratase, putative [Eimeria tenella]	Hammondia hammondi GDP mannose 4,6-dehydratase, putative partial mRNA
EVM0003561	175.3	1.09326	0.175775	6.21963	4.98323e-10	5.87426e-09	8.69748	6.85213	8.17225	18.738	17.1388	14.7425	--	--	--	K12343|3.51231e-59|tgo:TGME49_104480|3-oxo-5 alpha-steroid delta 4-dehydrogenase alpha 2, putative (EC:1.3.99.5); K12343 3-oxo-5-alpha-steroid 4-dehydrogenase 1 [EC:1.3.1.22] (A)	[I]	Lipid transport and metabolism	3-oxo-5-alpha-steroid 4-dehydrogenase	Very-long-chain enoyl-CoA reductase GN=gpsn2 OS=Dictyostelium discoideum (Slime mold) PE=3 SV=1	3-oxo-5 alpha-steroid delta 4-dehydrogenase alpha 2, putative {ECO:0000313|EMBL:CDJ53337.1} OS=Eimeria brunetti PE=4 SV=1	3-oxo-5 alpha-steroid delta 4-dehydrogenase alpha 2, putative [Eimeria brunetti]	--
EVM0001573	310.426	-1.20351	0.193563	-6.21766	5.04638e-10	5.93009e-09	5.48756	7.1922	5.08298	2.04891	3.74021	2.05615	--	--	--	--	--	--	Galactose oxidase, central domain	RING finger protein B GN=rngB OS=Dictyostelium discoideum (Slime mold) PE=2 SV=2	Kelch motif domain-containing protein, related {ECO:0000313|EMBL:CDJ38046.1} OS=Eimeria tenella (Coccidian parasite) PE=4 SV=1	Kelch motif domain-containing protein, related [Eimeria tenella]	Fonticula alba hypothetical protein partial mRNA
EVM0003889	92.828	-1.70701	0.275709	-6.19133	5.96579e-10	6.92694e-09	2.30302	2.94181	2.32618	0.899781	0.806849	0.622038	--	--	--	--	--	--	COPI associated protein	--	Chromosome III, complete sequence, related {ECO:0000313|EMBL:CDJ38500.1} OS=Eimeria tenella (Coccidian parasite) PE=4 SV=1	Chromosome III, complete sequence, related [Eimeria tenella]	--
EVM0003835	110.89	-1.34107	0.217319	-6.17099	6.78639e-10	7.83984e-09	4.19913	3.61891	3.38716	1.27164	1.4661	1.6772	--	--	Cellular Component: membrane (GO:0016020);;	--	[I]	Lipid transport and metabolism	Plasma-membrane choline transporter	CTL-like protein 1 GN=CG1311 OS=Drosophila melanogaster (Fruit fly) PE=2 SV=1	Uncharacterized protein {ECO:0000313|EMBL:CDJ58173.1} OS=Eimeria maxima (Coccidian parasite) PE=4 SV=1	hypothetical protein, conserved [Eimeria maxima]	Hammondia hammondi hypothetical protein partial mRNA
EVM0004886	276.635	-1.03692	0.169158	-6.1299	8.79353e-10	1.00656e-08	6.04199	7.21634	4.88755	2.60739	2.86948	3.35242	--	--	Biological Process: vacuolar transport (GO:0007034);; Biological Process: protein transport (GO:0015031);; Cellular Component: retromer complex (GO:0030904);;	K18466|0|tgo:TGME49_063500|vacuolar protein sorting 26, putative; K18466 vacuolar protein sorting-associated protein 26 (A)	[U]	Intracellular trafficking, secretion, and vesicular transport	Vacuolar protein sorting-associated protein 26	Vacuolar protein sorting-associated protein 26 GN=PFL2415w OS=Plasmodium falciparum (isolate 3D7) PE=3 SV=1	Vacuolar protein sorting 26, putative {ECO:0000313|EMBL:CDJ58802.1} OS=Eimeria maxima (Coccidian parasite) PE=4 SV=1	vacuolar protein sorting 26, putative [Eimeria maxima]	Eimeria tenella clone Etm041H07 hypothetical protein mRNA, complete cds
EVM0003166	195.265	-1.11539	0.182807	-6.10143	1.05123e-09	1.19601e-08	7.06286	9.41714	6.39195	3.94118	3.72211	2.94529	--	--	--	--	--	--	--	--	Axonemal inner arm I1 intermediate chain dynein IC138, putative {ECO:0000313|EMBL:CDJ68037.1} OS=Eimeria necatrix PE=4 SV=1	axonemal inner arm I1 intermediate chain dynein IC138, putative [Eimeria necatrix]	--
EVM0001553	212.198	-1.04579	0.17199	-6.08052	1.19795e-09	1.34662e-08	2.72564	3.00695	2.35833	1.46159	1.39885	1.07938	[G]	Carbohydrate transport and metabolism	Molecular Function: intramolecular transferase activity, phosphotransferases (GO:0016868);; Molecular Function: metal ion binding (GO:0046872);;	K01835|0|tgo:TGME49_085980|phosphoglucomutase/parafusin related protein 1, putative (EC:5.4.2.2); K01835 phosphoglucomutase [EC:5.4.2.2] (A)	[G]	Carbohydrate transport and metabolism	Phosphoglucomutase/phosphomannomutase, alpha/beta/alpha domain I	Phosphoglucomutase-1 GN=pgmA OS=Dictyostelium discoideum (Slime mold) PE=2 SV=1	Phosphoglucomutase/parafusin related protein 1, putative {ECO:0000313|EMBL:CDJ56818.1} OS=Eimeria maxima (Coccidian parasite) PE=4 SV=1	phosphoglucomutase/parafusin related protein 1, putative [Eimeria maxima]	Toxoplasma gondii mRNA for phosphoglucumutase, complete cds
EVM0007884	173.01	1.11971	0.185626	6.03204	1.61899e-09	1.76957e-08	4.22857	4.4863	2.87192	8.80316	8.9897	7.42778	--	--	--	--	--	--	--	--	Uncharacterized protein {ECO:0000313|EMBL:CDJ42448.1} OS=Eimeria tenella (Coccidian parasite) PE=4 SV=1	hypothetical protein, conserved [Eimeria tenella]	Eimeria tenella hypothetical protein (e2017b09.tmp0071) mRNA, complete cds
EVM0005394	159.568	-1.17336	0.2002	-5.86094	4.60242e-09	4.74916e-08	2.40687	1.83585	2.57812	1.25196	0.92791	0.83759	--	--	--	--	--	--	--	--	Uncharacterized protein {ECO:0000313|EMBL:CDJ45199.1} OS=Eimeria tenella (Coccidian parasite) PE=4 SV=1	hypothetical protein, conserved [Eimeria tenella]	--
EVM0000628	120.6	-1.34162	0.230316	-5.82514	5.70643e-09	5.78267e-08	6.87872	8.56737	9.4258	3.13751	2.29358	4.21638	--	--	--	--	--	--	--	--	Uncharacterized protein {ECO:0000313|EMBL:CDI76782.1} OS=Eimeria acervulina (Coccidian parasite) PE=4 SV=1	hypothetical protein EAH_00058470 [Eimeria acervulina]	Eimeria tenella clone Etm118G09 hypothetical protein mRNA, complete cds
EVM0000190	140.912	-1.11502	0.195268	-5.71023	1.12825e-08	1.09457e-07	18.261	15.1324	12.3315	5.81553	8.95222	6.5364	--	--	--	--	--	--	--	--	Uncharacterized protein {ECO:0000313|EMBL:CDJ42856.1} OS=Eimeria tenella (Coccidian parasite) PE=4 SV=1	hypothetical protein, conserved [Eimeria tenella]	--
EVM0006770	130.944	-1.19196	0.215381	-5.53418	3.12681e-08	2.82882e-07	3.78031	3.95376	2.77125	1.26336	1.52938	1.79861	--	--	--	--	--	--	--	--	Uncharacterized protein {ECO:0000313|EMBL:CDJ45517.1} OS=Eimeria tenella (Coccidian parasite) PE=4 SV=1	hypothetical protein, conserved [Eimeria tenella]	Eimeria tenella chromosome 1, ordered contigs
EVM0004862	67.1989	-1.6814	0.304027	-5.53043	3.19456e-08	2.88663e-07	3.57127	3.76578	3.07331	1.29598	0.565359	1.31227	[KR]	--	--	--	--	--	Acetyltransferase (GNAT) family	Diamine acetyltransferase {ECO:0000305|PubMed:17289169} OS=Cryptosporidium parvum (strain Iowa II) PE=1 SV=1	Acetyltransferase domain-containing protein, putative {ECO:0000313|EMBL:CDJ42495.1} OS=Eimeria tenella (Coccidian parasite) PE=4 SV=1	acetyltransferase domain-containing protein, putative [Eimeria tenella]	--
EVM0005575	138.733	-1.12946	0.207078	-5.45429	4.91683e-08	4.35897e-07	16.8278	14.0808	13.8951	6.70709	9.02155	5.06055	--	--	--	--	--	--	--	--	--	--	Eimeria tenella clone Etm024C06 hypothetical protein mRNA, complete cds
EVM0005537	65.1421	-1.59081	0.292102	-5.44608	5.14932e-08	4.54362e-07	2.31878	2.11298	2.20652	0.616956	0.757692	0.829103	[R]	General function prediction only	--	--	[TZ]	--	PX domain	--	Uncharacterized protein {ECO:0000313|EMBL:CDJ45103.1} (Fragment) OS=Eimeria tenella (Coccidian parasite) PE=4 SV=1	hypothetical protein ETH_00014340, partial [Eimeria tenella]	Drosophila mojavensis GI18399 (Dmoj\GI18399), mRNA
EVM0002581	301.325	-1.0043	0.184758	-5.43577	5.45588e-08	4.80284e-07	3.68908	3.66808	4.29329	1.81568	1.2605	2.67893	[R]	General function prediction only	Molecular Function: nucleoside-triphosphatase activity (GO:0017111);;	--	[A]	RNA processing and modification	Sec63 Brl domain	Putative U5 small nuclear ribonucleoprotein 200 kDa helicase GN=l(3)72Ab OS=Drosophila melanogaster (Fruit fly) PE=2 SV=4	Uncharacterized protein {ECO:0000313|EMBL:CDJ67970.1} (Fragment) OS=Eimeria necatrix PE=4 SV=1	hypothetical protein ENH_00045830, partial [Eimeria necatrix]	Toxoplasma gondii ME49 activating signal cointegrator 1 complex subunit 3, putative, mRNA
EVM0007673	87.9805	-1.38998	0.255823	-5.43339	5.52932e-08	4.8561e-07	22.3514	23.1675	28.9629	8.41548	5.8549	13.7259	--	--	--	--	--	--	--	--	Uncharacterized protein {ECO:0000313|EMBL:CDJ40395.1} OS=Eimeria tenella (Coccidian parasite) PE=4 SV=1	hypothetical protein, conserved [Eimeria tenella]	Eimeria tenella clone Etm028D06 hypothetical protein mRNA, complete cds
EVM0002400	112.83	-1.22915	0.227143	-5.41135	6.25498e-08	5.43618e-07	2.24024	2.02078	2.87253	0.931609	1.15851	0.971355	--	--	--	--	[R]	General function prediction only	Cleft lip and palate transmembrane protein 1 (CLPTM1)	CLPTM1-like membrane protein cnrB GN=cnrB OS=Dictyostelium discoideum (Slime mold) PE=3 SV=1	Cleft lip and palate transmembrane protein 1, putative {ECO:0000313|EMBL:CDJ38328.1} OS=Eimeria tenella (Coccidian parasite) PE=4 SV=1	Cleft lip and palate transmembrane protein 1, putative [Eimeria tenella]	Neospora caninum Liverpool putative Cleft lip and palate transmembrane protein 1 (NCLIV_009390) mRNA, complete cds
EVM0006867	87.4648	-1.34847	0.252833	-5.33342	9.63804e-08	8.05924e-07	5.80246	3.77545	4.12156	1.77338	2.15815	1.50281	--	--	--	--	--	--	--	--	Uncharacterized protein {ECO:0000313|EMBL:CDJ43164.1} OS=Eimeria tenella (Coccidian parasite) PE=4 SV=1	hypothetical protein, conserved [Eimeria tenella]	--
EVM0002390	102.68	-1.29632	0.243074	-5.33301	9.6599e-08	8.06854e-07	4.56922	3.76179	3.53395	1.48979	2.00388	1.39538	--	--	--	--	--	--	--	--	Uncharacterized protein {ECO:0000313|EMBL:CDJ67727.1} OS=Eimeria necatrix PE=4 SV=1	hypothetical protein, conserved [Eimeria necatrix]	Drosophila mojavensis GI21037 (Dmoj\GI21037), mRNA
EVM0001732	49.8425	-1.94565	0.365497	-5.32328	1.01911e-07	8.46708e-07	0.5921	1.21587	1.15174	0.276344	0.272583	0.224321	--	--	--	--	--	--	--	--	Uncharacterized protein {ECO:0000313|EMBL:CDJ33777.1} OS=Eimeria mitis PE=4 SV=1	hypothetical protein, conserved [Eimeria mitis]	--
EVM0001715	170.623	1.05397	0.200626	5.25341	1.49311e-07	1.21471e-06	9.03743	8.15263	9.00433	19.6704	21.1221	13.7276	#N/A	#N/A	#N/A	#N/A	#N/A	#N/A	#N/A	#N/A	#N/A	#N/A	#N/A
EVM0005301	142.057	-1.14817	0.218675	-5.25057	1.51631e-07	1.23225e-06	12.4922	15.7153	18.7085	7.78069	7.37961	6.07302	--	--	--	--	--	--	--	--	Uncharacterized protein {ECO:0000313|EMBL:CDJ68334.1} OS=Eimeria necatrix PE=4 SV=1	hypothetical protein ENH_00051070 [Eimeria necatrix]	Drosophila mojavensis GI17266 (Dmoj\GI17266), mRNA
EVM0000757	198.188	1.14035	0.218265	5.22459	1.74542e-07	1.39876e-06	16.1344	29.7317	19.0427	42.3813	45.982	54.7456	#N/A	#N/A	#N/A	#N/A	#N/A	#N/A	#N/A	#N/A	#N/A	#N/A	#N/A
EVM0001097	137.062	1.10445	0.21404	5.16003	2.46915e-07	1.9374e-06	1.85359	1.44915	1.27982	3.28673	4.13315	2.49555	--	--	--	--	--	--	--	--	Uncharacterized protein {ECO:0000313|EMBL:CDJ37551.1} OS=Eimeria tenella (Coccidian parasite) PE=4 SV=1	hypothetical protein, conserved [Eimeria tenella]	--
EVM0000277	15.8157	2.91749	0.567783	5.13838	2.77118e-07	2.15635e-06	0.0519221	0.0299228	0.0822156	0.449765	0.390708	0.394934	--	--	--	--	--	--	--	--	Uncharacterized protein {ECO:0000313|EMBL:CDJ42421.1} OS=Eimeria tenella (Coccidian parasite) PE=4 SV=1	hypothetical protein, conserved [Eimeria tenella]	Anopheles gambiae str. PEST AGAP013287-PA (AgaP_AGAP013287) mRNA, complete cds
EVM0008138	65.7445	-1.61198	0.314628	-5.12345	2.99988e-07	2.32467e-06	2.99953	2.462	2.37479	0.762753	1.09215	0.737463	--	--	--	--	--	--	--	--	Uncharacterized protein {ECO:0000313|EMBL:CDJ53575.1} OS=Eimeria brunetti PE=4 SV=1	hypothetical protein, conserved [Eimeria brunetti]	--
EVM0001168	106.277	-1.45087	0.284003	-5.10864	3.24488e-07	2.4965e-06	3.75677	4.18832	3.58511	0.847455	1.13989	2.15447	#N/A	#N/A	#N/A	#N/A	#N/A	#N/A	#N/A	#N/A	#N/A	#N/A	#N/A
EVM0001295	85.4592	1.10173	0.220449	4.99766	5.80308e-07	4.2554e-06	5.58864	3.82663	4.70939	11.0841	9.20055	9.96079	--	--	--	--	--	--	--	--	Uncharacterized protein {ECO:0000313|EMBL:CDI81222.1} OS=Eimeria praecox PE=4 SV=1	hypothetical protein EPH_0051950 [Eimeria praecox]	Monosiga brevicollis MX1 predicted protein MONBRDRAFT_8906 mRNA, complete cds
EVM0004495	133.55	1.08585	0.220378	4.92722	8.34064e-07	5.94211e-06	2.12888	1.5904	2.67258	5.24701	4.90445	3.43182	--	--	--	--	--	--	--	--	Uncharacterized protein {ECO:0000313|EMBL:CDJ43103.1} OS=Eimeria tenella (Coccidian parasite) PE=4 SV=1	hypothetical protein, conserved [Eimeria tenella]	--
EVM0006680	55.5954	-1.33979	0.273464	-4.89932	9.61675e-07	6.76144e-06	4.42203	3.92377	3.66773	1.86205	1.0734	1.74405	--	--	--	--	--	--	--	--	Uncharacterized protein {ECO:0000313|EMBL:CDJ40553.1} OS=Eimeria tenella (Coccidian parasite) PE=4 SV=1	hypothetical protein, conserved [Eimeria tenella]	--
EVM0002453	88.1877	-1.21543	0.249844	-4.86474	1.14605e-06	7.99044e-06	4.27312	4.14166	3.65223	1.6124	1.74447	1.83853	[R]	General function prediction only	Molecular Function: hydrolase activity (GO:0016787);;	--	[A]	RNA processing and modification	Sec63 Brl domain	Activating signal cointegrator 1 complex subunit 3 GN=ascc3 OS=Dictyostelium discoideum (Slime mold) PE=3 SV=1	Activating signal cointegrator 1 complex subunit 3, putative {ECO:0000313|EMBL:CDJ38412.1} OS=Eimeria tenella (Coccidian parasite) PE=4 SV=1	activating signal cointegrator 1 complex subunit 3, putative [Eimeria tenella]	Toxoplasma gondii ME49 activating signal cointegrator 1 complex subunit 3, putative, mRNA
EVM0006117	140.555	-1.18944	0.24504	-4.85404	1.20972e-06	8.39538e-06	2.68382	4.95214	4.51994	1.38078	1.6001	2.3279	--	--	--	--	--	--	--	--	Uncharacterized protein {ECO:0000313|EMBL:CDJ69885.1} (Fragment) OS=Eimeria necatrix PE=4 SV=1	hypothetical protein, conserved, partial [Eimeria necatrix]	Drosophila erecta GG19009 (Dere\GG19009), mRNA
EVM0001350	115.626	-1.37714	0.287798	-4.78508	1.70918e-06	1.15177e-05	2.84723	3.12201	3.51597	1.3414	1.89603	0.489781	--	--	--	--	--	--	--	--	Uncharacterized protein {ECO:0000313|EMBL:CDJ37601.1} OS=Eimeria tenella (Coccidian parasite) PE=4 SV=1	hypothetical protein, conserved [Eimeria tenella]	--
EVM0007011	70.48	-1.42882	0.298606	-4.78496	1.71024e-06	1.15177e-05	1.65429	1.58895	1.91002	0.688938	0.82371	0.430187	[I]	Lipid transport and metabolism	Biological Process: metabolic process (GO:0008152);; Molecular Function: ligase activity (GO:0016874);;	K15013|0|tgo:TGME49_097220|very long-chain acyl-CoA synthetase, putative (EC:6.2.1.3); K15013 long-chain-fatty-acid--CoA ligase ACSBG [EC:6.2.1.3] (A)	[I]	Lipid transport and metabolism	AMP-binding enzyme	Very long-chain-fatty-acid--CoA ligase bubblegum GN=bgm OS=Drosophila melanogaster (Fruit fly) PE=2 SV=1	Very long-chain acyl-CoA synthetase, putative {ECO:0000313|EMBL:CDJ40499.1} OS=Eimeria tenella (Coccidian parasite) PE=4 SV=1	very long-chain acyl-CoA synthetase, putative [Eimeria tenella]	Toxoplasma gondii ME49 very long-chain acyl-CoA synthetase, putative, mRNA
EVM0003151	93.8737	1.26401	0.269595	4.68856	2.75129e-06	1.78561e-05	6.87474	6.19052	7.33512	15.4112	22.424	11.4387	--	--	--	--	--	--	--	--	--	--	Gongylonema pulchrum genome assembly G_pulchrum_Hokkaido ,scaffold GPUH_scaffold0030352
EVM0001351	78.6579	-1.14828	0.245962	-4.66853	3.03357e-06	1.95194e-05	17.3665	17.6073	13.3675	7.8351	7.02587	6.93089	--	--	--	--	--	--	--	--	Uncharacterized protein {ECO:0000313|EMBL:CDJ37767.1} OS=Eimeria tenella (Coccidian parasite) PE=4 SV=1	hypothetical protein ETH_00004490 [Eimeria tenella]	--
EVM0000240	62.2189	-1.40859	0.305628	-4.60884	4.04917e-06	2.53588e-05	3.37164	3.43776	3.38808	1.73177	0.818426	1.22748	--	--	--	--	--	--	--	--	Uncharacterized protein {ECO:0000313|EMBL:CDJ44487.1} OS=Eimeria tenella (Coccidian parasite) PE=4 SV=1	hypothetical protein ETH_00037795 [Eimeria tenella]	Drosophila sechellia GM12724 (Dsec\GM12724), mRNA
EVM0003577	54.1087	-1.37734	0.299354	-4.60103	4.20397e-06	2.6219e-05	7.81226	9.6274	10.503	3.9901	2.32569	4.23555	--	--	--	--	--	--	--	--	FtsJ-like methyltransferase domain-containing protein, putative {ECO:0000313|EMBL:CDJ41242.1} OS=Eimeria tenella (Coccidian parasite) PE=4 SV=1	ftsJ-like methyltransferase domain-containing protein, putative [Eimeria tenella]	--
EVM0006025	48.4009	1.4708	0.326321	4.50723	6.56794e-06	3.95816e-05	0.649768	0.291249	0.442985	1.06837	1.54219	1.23253	--	--	--	--	--	--	--	--	Uncharacterized protein {ECO:0000313|EMBL:CDJ38342.1} OS=Eimeria tenella (Coccidian parasite) PE=4 SV=1	hypothetical protein, conserved [Eimeria tenella]	--
EVM0008225	361.595	1.17935	0.262562	4.4917	7.06579e-06	4.2344e-05	1.76519	2.52148	2.75924	5.4481	6.60299	3.92468	--	--	--	--	--	--	--	J domain-containing protein DDB_G0295729 GN=DDB_G0295729 OS=Dictyostelium discoideum (Slime mold) PE=3 SV=1	Uncharacterized protein {ECO:0000313|EMBL:CDJ44630.1} (Fragment) OS=Eimeria tenella (Coccidian parasite) PE=4 SV=1	hypothetical protein ETH_00035780, partial [Eimeria tenella]	Parascaris equorum genome assembly P_equorum ,scaffold PEQ_contig0001194
EVM0004085	687.427	-1.5364	0.342963	-4.47979	7.47168e-06	4.46695e-05	114.287	43.5144	43.4563	22.9231	23.5879	22.8719	--	--	--	--	--	--	Sporozoite TA4 surface antigen	Sporulated oocyst TA4 antigen 8 kDa subunit (Precursor) OS=Eimeria tenella (Coccidian parasite) PE=1 SV=2	SAG family member {ECO:0000313|EMBL:CDJ45524.1} OS=Eimeria tenella (Coccidian parasite) PE=4 SV=1	SAG family member [Eimeria tenella]	Eimeria tenella mRNA for surface antigen 9 (sag9 gene)
EVM0007721	54.3653	-1.19863	0.26971	-4.44416	8.82369e-06	5.18038e-05	3.18622	4.34499	3.2311	1.59722	1.52774	1.5625	--	--	--	--	--	--	Fasciclin domain	--	Fasciclin domain-containing protein, putative {ECO:0000313|EMBL:CDJ38117.1} OS=Eimeria tenella (Coccidian parasite) PE=4 SV=1	fasciclin domain-containing protein, putative [Eimeria tenella]	Fonticula alba hypothetical protein mRNA
EVM0005791	50.1892	1.45385	0.327315	4.44174	8.92342e-06	5.23484e-05	0.790695	1.06888	0.46371	2.43105	2.16812	1.782	--	--	--	--	--	--	Radial spoke protein 3	--	Uncharacterized protein {ECO:0000313|EMBL:CDJ42003.1} OS=Eimeria tenella (Coccidian parasite) PE=4 SV=1	hypothetical protein, conserved [Eimeria tenella]	--
EVM0006657	70.4098	-1.36914	0.308682	-4.43543	9.18878e-06	5.36119e-05	1.1588	1.27591	0.755212	0.573809	0.205818	0.429957	--	--	--	--	--	--	--	--	Uncharacterized protein {ECO:0000313|EMBL:CDJ43409.1} OS=Eimeria tenella (Coccidian parasite) PE=4 SV=1	hypothetical protein, conserved [Eimeria tenella]	--
EVM0004473	115.341	1.07661	0.243706	4.41768	9.97657e-06	5.7715e-05	10.2462	8.18398	8.85927	20.3398	23.9551	13.4905	--	--	--	--	--	--	--	--	Uncharacterized protein {ECO:0000313|EMBL:CDJ41334.1} OS=Eimeria tenella (Coccidian parasite) PE=4 SV=1	hypothetical protein, conserved [Eimeria tenella]	--
EVM0003113	41.274	-1.64005	0.371689	-4.41241	1.02227e-05	5.8912e-05	1.96643	1.184	2.03322	0.503176	0.534324	0.620118	--	--	--	--	--	--	--	--	Uncharacterized protein {ECO:0000313|EMBL:CDJ37469.1} OS=Eimeria tenella (Coccidian parasite) PE=4 SV=1	hypothetical protein, conserved [Eimeria tenella]	--
EVM0001743	61.5627	-1.23769	0.282074	-4.38783	1.14486e-05	6.51267e-05	2.9148	3.01504	2.14499	0.977855	0.997806	1.42121	--	--	--	--	--	--	--	--	Uncharacterized protein {ECO:0000313|EMBL:CDJ67870.1} OS=Eimeria necatrix PE=4 SV=1	hypothetical protein, conserved [Eimeria necatrix]	--
EVM0006274	26.5808	-1.91594	0.438972	-4.3646	1.27354e-05	7.20108e-05	1.23145	1.21866	1.25564	0.235702	0.45291	0.315379	--	--	--	--	--	--	--	--	Uncharacterized protein {ECO:0000313|EMBL:CDJ38582.1} (Fragment) OS=Eimeria tenella (Coccidian parasite) PE=4 SV=1	hypothetical protein, conserved, partial [Eimeria tenella]	Anopheles gambiae str. PEST AGAP013096-PA (AgaP_AGAP013096) mRNA, complete cds
EVM0002554	34.2267	-3.52859	0.808829	-4.36259	1.28532e-05	7.25672e-05	3.02214	4.07958	2.5328	0.0982682	0.594802	0.161072	[R]	General function prediction only	Biological Process: cellular process (GO:0009987);; Molecular Function: lyase activity (GO:0016829);;	--	--	--	MmgE/PrpD family	--	Putative MmgE/PrpD family domain containing protein {ECO:0000313|EMBL:CBZ51548.1} OS=Neospora caninum (strain Liverpool) PE=4 SV=1	putative MmgE/PrpD family domain containing protein [Neospora caninum Liverpool]	Toxoplasma gondii ME49 MmgE/PrpD family domain containing protein, mRNA
EVM0004956	18.4201	-2.47663	0.567812	-4.3617	1.29056e-05	7.28087e-05	0.637933	0.640589	0.746117	0.0784937	0.140773	0.147039	[RTKL]	--	Molecular Function: transferase activity (GO:0016740);;	--	[D]	Cell cycle control, cell division, chromosome partitioning	Protein kinase domain	Developmentally-regulated protein kinase 1 GN=pkaD OS=Dictyostelium discoideum (Slime mold) PE=2 SV=2	Uncharacterized protein {ECO:0000313|EMBL:CDJ37298.1} OS=Eimeria tenella (Coccidian parasite) PE=4 SV=1	hypothetical protein, conserved [Eimeria tenella]	--
EVM0006509	798.686	-1.06892	0.249413	-4.28574	1.82129e-05	9.93803e-05	48.529	52.3481	50.645	28.2376	17.523	26.3204	--	--	--	--	--	--	Sporozoite TA4 surface antigen	Sporulated oocyst TA4 antigen 8 kDa subunit (Precursor) OS=Eimeria tenella (Coccidian parasite) PE=1 SV=2	SAG family member {ECO:0000313|EMBL:CDJ40612.1} OS=Eimeria tenella (Coccidian parasite) PE=4 SV=1	SAG family member [Eimeria tenella]	Eimeria tenella mRNA for surface antigen 10 (sag10 gene)
EVM0006102	27.9547	-1.71542	0.400275	-4.2856	1.82243e-05	9.93803e-05	1.58994	1.11809	1.18012	0.358661	0.275672	0.527893	--	--	--	--	--	--	--	--	Uncharacterized protein {ECO:0000313|EMBL:CDJ38401.1} OS=Eimeria tenella (Coccidian parasite) PE=4 SV=1	hypothetical protein ETH_00043525 [Eimeria tenella]	Anopheles gambiae retrotransposon RTAg4 DNA, complete sequence
EVM0005473	89.9604	-1.09262	0.255414	-4.27783	1.88723e-05	0.000102542	4.48675	4.64104	3.54371	2.33567	1.4661	2.07827	[R]	General function prediction only	--	--	[R]	General function prediction only	DEAD/DEAH box helicase	Putative U5 small nuclear ribonucleoprotein 200 kDa helicase GN=Y46G5A.4 OS=Caenorhabditis elegans PE=3 SV=1	DNA polymerase, putative {ECO:0000313|EMBL:CDJ40042.1} OS=Eimeria tenella (Coccidian parasite) PE=4 SV=1	DNA polymerase, putative [Eimeria tenella]	--
EVM0004939	51.8972	1.30914	0.308087	4.24924	2.14501e-05	0.000115711	0.954757	0.603321	1.09407	2.51648	2.50053	1.57134	--	--	--	--	--	--	--	--	Uncharacterized protein {ECO:0000313|EMBL:CDJ42459.1} OS=Eimeria tenella (Coccidian parasite) PE=4 SV=1	hypothetical protein ETH_00018590 [Eimeria tenella]	Eimeria tenella chromosome 1, ordered contigs
EVM0004362	18.177	-2.43847	0.579075	-4.21098	2.54268e-05	0.000134458	0.521091	1.50153	0.916795	0.130609	0.281086	0.146799	--	--	--	--	--	--	--	--	Uncharacterized protein {ECO:0000313|EMBL:CDJ39320.1} OS=Eimeria tenella (Coccidian parasite) PE=4 SV=1	hypothetical protein, conserved [Eimeria tenella]	Schistocephalus solidus genome assembly S_solidus_NST_G2 ,scaffold SSLN_scaffold0000133
EVM0000068	53.6577	-1.25544	0.299534	-4.19131	2.77352e-05	0.000145639	3.13139	4.22706	2.80584	1.1073	1.18125	1.93121	--	--	Biological Process: cellular protein modification process (GO:0006464);; Molecular Function: ligase activity (GO:0016874);;	--	[O]	Posttranslational modification, protein turnover, chaperones	Tubulin-tyrosine ligase family	Probable beta-tubulin polyglutamylase GN=Ttll6a OS=Tetrahymena thermophila (strain SB210) PE=3 SV=1	Tubulin-tyrosine ligase family protein, putative {ECO:0000313|EMBL:CDJ40401.1} OS=Eimeria tenella (Coccidian parasite) PE=4 SV=1	tubulin-tyrosine ligase family protein, putative [Eimeria tenella]	Neospora caninum Liverpool putative tubulin-tyrosine ligase family protein (NCLIV_019050) mRNA, complete cds
EVM0007474	61.1431	-1.36519	0.326084	-4.18663	2.83128e-05	0.000148568	3.37452	3.56537	2.8804	1.33215	1.63825	0.891235	[R]	General function prediction only	--	--	--	--	TPR repeat	--	TPR domain-containing protein, putative {ECO:0000313|EMBL:CDJ42898.1} OS=Eimeria tenella (Coccidian parasite) PE=4 SV=1	TPR domain-containing protein, putative [Eimeria tenella]	--
EVM0007925	94.1933	1.10089	0.263699	4.17481	2.98235e-05	0.000156268	6.0278	7.0236	8.89922	14.9796	21.348	11.0238	--	--	--	--	--	--	--	--	Uncharacterized protein {ECO:0000313|EMBL:CDJ44531.1} OS=Eimeria tenella (Coccidian parasite) PE=4 SV=1	hypothetical protein, conserved [Eimeria tenella]	--
EVM0001418	39.6545	1.49658	0.358585	4.17357	2.99868e-05	0.000156695	2.74702	1.93063	1.12722	6.4688	3.82195	6.00224	#N/A	#N/A	#N/A	#N/A	#N/A	#N/A	#N/A	#N/A	#N/A	#N/A	#N/A
EVM0002750	67.9475	-1.04235	0.250173	-4.16652	3.09281e-05	0.000161277	4.63721	5.36511	5.42361	2.28232	2.17451	2.98386	--	--	--	--	--	--	--	--	Uncharacterized protein {ECO:0000313|EMBL:CDJ67583.1} OS=Eimeria necatrix PE=4 SV=1	hypothetical protein, conserved [Eimeria necatrix]	Eimeria tenella hypothetical protein, conserved (stchr1_040106_646631) partial mRNA
EVM0007165	47.3946	1.24097	0.300516	4.12948	3.63582e-05	0.000186485	1.41344	0.969722	1.07908	2.55075	3.28391	2.38911	--	--	Molecular Function: hydrolase activity (GO:0016787);;	--	[O]	Posttranslational modification, protein turnover, chaperones	Eukaryotic aspartyl protease	Lysosomal aspartic protease (Precursor) GN=AAEL006169 OS=Aedes aegypti (Yellowfever mosquito) PE=1 SV=2	Aspartyl protease {ECO:0000313|EMBL:EPR64466.1} OS=Toxoplasma gondii GT1 PE=4 SV=1	aspartyl protease [Toxoplasma gondii GT1]	Hammondia hammondi aspartyl protease partial mRNA
EVM0005017	64.9698	-1.13985	0.276256	-4.12608	3.69003e-05	0.000188493	2.30133	2.08192	1.9862	1.01412	0.97434	0.904628	--	--	--	--	--	--	--	--	Uncharacterized protein {ECO:0000313|EMBL:CDJ41320.1} OS=Eimeria tenella (Coccidian parasite) PE=4 SV=1	hypothetical protein, conserved [Eimeria tenella]	--
EVM0005982	76.8737	1.0014	0.24477	4.09119	4.2917e-05	0.000215994	4.25015	4.32242	4.5773	9.36193	8.9513	8.02914	[IQR]	--	--	K00079|7.09658e-56|tgo:TGME49_090890|carbonyl reductase, putative (EC:1.1.1.189); K00079 carbonyl reductase 1 [EC:1.1.1.184 1.1.1.189 1.1.1.197] (A)	[Q]	Secondary metabolites biosynthesis, transport and catabolism	short chain dehydrogenase	WW domain-containing oxidoreductase GN=Wwox OS=Drosophila melanogaster (Fruit fly) PE=2 SV=1	Uncharacterized protein {ECO:0000313|EMBL:CDJ40461.1} OS=Eimeria tenella (Coccidian parasite) PE=3 SV=1	hypothetical protein ETH_00019485 [Eimeria tenella]	--
EVM0005920	80.1801	-1.00527	0.245912	-4.08792	4.35256e-05	0.000218764	7.38525	6.39297	8.03067	4.1135	2.76649	3.85283	--	--	--	--	--	--	--	--	Uncharacterized protein {ECO:0000313|EMBL:CDJ57356.1} OS=Eimeria maxima (Coccidian parasite) PE=4 SV=1	hypothetical protein, conserved [Eimeria maxima]	--
EVM0001422	71.8274	1.02088	0.250114	4.08167	4.47131e-05	0.000224104	0.777121	0.895713	0.69217	1.36737	1.55626	1.87182	--	--	--	--	--	--	--	Protein PF14_0175 GN=PF14_0175 OS=Plasmodium falciparum (isolate 3D7) PE=3 SV=1	Uncharacterized protein {ECO:0000313|EMBL:CDJ37595.1} OS=Eimeria tenella (Coccidian parasite) PE=4 SV=1	hypothetical protein, conserved [Eimeria tenella]	Drosophila grimshawi GH12814 (Dgri\GH12814), mRNA
EVM0006455	92.3922	-1.04471	0.256707	-4.06967	4.70802e-05	0.000234745	19.213	17.5754	20.2214	8.25538	8.88329	10.4385	--	--	--	--	--	--	--	--	DNA repair protein, putative {ECO:0000313|EMBL:CDJ42752.1} OS=Eimeria tenella (Coccidian parasite) PE=4 SV=1	DNA repair protein, putative [Eimeria tenella]	--
EVM0005568	13.0156	-2.30265	0.579896	-3.97079	7.16338e-05	0.000345249	1.90563	2.11196	2.24858	0.330671	0.444778	0.495546	--	--	--	--	--	--	--	--	Uncharacterized protein {ECO:0000313|EMBL:CDJ39320.1} OS=Eimeria tenella (Coccidian parasite) PE=4 SV=1	hypothetical protein, conserved [Eimeria tenella]	--
EVM0001782	54.1282	-1.16714	0.295452	-3.95036	7.80333e-05	0.000373218	2.0841	2.36108	2.82937	0.819718	1.0053	1.40006	--	--	--	--	--	--	--	--	Uncharacterized protein {ECO:0000313|EMBL:CDJ32003.1} OS=Eimeria mitis PE=4 SV=1	hypothetical protein EMH_0011080 [Eimeria mitis]	Eimeria tenella hypothetical protein (e1096f12.tmp0041) mRNA, complete cds
EVM0002157	73.7329	-1.02546	0.265211	-3.86659	0.000110369	0.00051348	3.82022	3.8704	5.17901	1.55826	2.92167	1.94602	--	--	--	--	--	--	--	--	Putative uncharacterized protein {ECO:0000313|EMBL:AET50861.1} OS=Eimeria tenella (Coccidian parasite) PE=2 SV=1	hypothetical protein [Eimeria tenella]	--
EVM0003482	61.0115	-1.17964	0.306094	-3.85384	0.000116278	0.000538305	1.48779	1.53488	1.39968	1.01099	0.512734	0.41913	--	--	--	--	[I]	Lipid transport and metabolism	Acyl CoA binding protein	Acyl-CoA-binding protein homolog 3 GN=acbp-3 OS=Caenorhabditis elegans PE=3 SV=2	Uncharacterized protein {ECO:0000313|EMBL:CDJ39032.1} OS=Eimeria tenella (Coccidian parasite) PE=4 SV=1	hypothetical protein, conserved [Eimeria tenella]	Caenorhabditis remanei hypothetical protein (CRE_08190) mRNA, complete cds
EVM0006884	58.1415	-1.04949	0.275437	-3.81026	0.000138819	0.000631068	6.91071	8.53427	4.88513	2.96938	3.79434	3.12886	--	--	--	--	--	--	--	--	--	--	Eimeria tenella hypothetical protein (e1107e11.tmp1) mRNA, complete cds
EVM0002271	57.8227	-1.28352	0.339583	-3.77971	0.000157012	0.00070599	2.11132	1.62234	1.81087	0.592694	0.569442	1.07062	--	--	--	--	--	--	Sporozoite TA4 surface antigen	Sporulated oocyst TA4 antigen 8 kDa subunit (Precursor) OS=Eimeria tenella (Coccidian parasite) PE=1 SV=2	SAG family member {ECO:0000313|EMBL:CDJ41982.1} OS=Eimeria tenella (Coccidian parasite) PE=4 SV=1	SAG family member [Eimeria tenella]	Eimeria tenella clone Etm031F01 hypothetical protein mRNA, complete cds
EVM0000368	42.0905	1.41164	0.380722	3.70779	0.000209077	0.000918642	7.74909	4.36874	6.33517	20.0645	20.0368	9.11176	#N/A	#N/A	#N/A	#N/A	#N/A	#N/A	#N/A	#N/A	#N/A	#N/A	#N/A
EVM0006059	71.6298	-1.14744	0.310916	-3.69051	0.000223803	0.000976488	4.22487	7.1962	4.29264	2.03317	3.62357	1.57107	--	--	Molecular Function: hydrolase activity (GO:0016787);;	--	[I]	Lipid transport and metabolism	Phospholipase/Carboxylesterase	Acyl-protein thioesterase 1 homolog 2 GN=DDB_G0268064 OS=Dictyostelium discoideum (Slime mold) PE=1 SV=1	Acyl-protein thioesterase 1, related {ECO:0000313|EMBL:CDJ42070.1} OS=Eimeria tenella (Coccidian parasite) PE=4 SV=1	Acyl-protein thioesterase 1, related [Eimeria tenella]	--
EVM0001983	36.7469	1.16176	0.315232	3.6854	0.000228342	0.000993983	0.421653	0.306818	0.328773	0.772463	0.744374	0.842298	--	--	--	--	--	--	--	--	Uncharacterized protein {ECO:0000313|EMBL:CDJ46364.1} OS=Eimeria brunetti PE=4 SV=1	hypothetical protein, conserved [Eimeria brunetti]	--
EVM0000220	28.4237	1.47331	0.404024	3.64659	0.000265741	0.00114158	0.0748176	0.161691	0.129576	0.365677	0.302685	0.347773	--	--	--	--	--	--	--	--	Uncharacterized protein {ECO:0000313|EMBL:CDJ66734.1} OS=Eimeria necatrix PE=4 SV=1	hypothetical protein, conserved [Eimeria necatrix]	--
EVM0000969	53.9798	-1.26836	0.347986	-3.64486	0.000267536	0.00114796	1.16462	1.64743	1.38308	0.305706	0.488297	0.930583	[L]	Replication, recombination and repair	--	--	[L]	Replication, recombination and repair	Rad51	DNA repair protein RAD51 homolog 3 GN=rad51c OS=Dictyostelium discoideum (Slime mold) PE=3 SV=1	DNA repair protein recA , putative {ECO:0000313|EMBL:CDJ44928.1} OS=Eimeria tenella (Coccidian parasite) PE=4 SV=1	DNA repair protein recA , putative [Eimeria tenella]	Haliotis discus hannai clone CHh406 microsatellite sequence
EVM0001734	69.0606	-1.09102	0.302334	-3.60867	0.000307771	0.00130273	5.05027	7.87377	6.664	3.10402	4.53048	1.73202	--	--	--	--	--	--	--	--	Uncharacterized protein {ECO:0000313|EMBL:CDJ38527.1} (Fragment) OS=Eimeria tenella (Coccidian parasite) PE=4 SV=1	hypothetical protein, conserved, partial [Eimeria tenella]	Fonticula alba hypothetical protein partial mRNA
EVM0005314	73.0744	-1.22271	0.339141	-3.6053	0.000311798	0.00131829	0.23423	0.38832	0.400104	0.0955423	0.0934631	0.244058	--	--	--	--	[R]	General function prediction only	RAVE protein 1 C terminal	--	Uncharacterized protein {ECO:0000313|EMBL:CDJ45218.1} OS=Eimeria tenella (Coccidian parasite) PE=4 SV=1	hypothetical protein, conserved [Eimeria tenella]	Spirometra erinaceieuropaei genome assembly S_erinaceieuropaei ,scaffold SPER_scaffold0002005
EVM0000156	42.5026	-1.23939	0.34454	-3.59724	0.000321611	0.00135444	8.4903	7.02234	5.95172	2.12805	3.86423	3.18912	--	--	--	--	--	--	--	--	Uncharacterized protein {ECO:0000313|EMBL:CDJ44298.1} (Fragment) OS=Eimeria tenella (Coccidian parasite) PE=4 SV=1	hypothetical protein, conserved, partial [Eimeria tenella]	--
EVM0003870	12.0925	2.27787	0.640445	3.5567	0.000375546	0.001558	0.150966	0.181254	0.0186754	0.527851	0.755806	0.430607	--	--	--	--	--	--	--	--	Uncharacterized protein {ECO:0000313|EMBL:CDJ43114.1} OS=Eimeria tenella (Coccidian parasite) PE=4 SV=1	hypothetical protein, conserved [Eimeria tenella]	--
EVM0000419	22.3273	-1.69685	0.477948	-3.55029	0.000384814	0.00158942	0.345185	0.663104	0.388196	0.226522	0.0761725	0.119344	--	--	--	--	--	--	--	--	Intraconoid microtubule associated protein 1, related {ECO:0000313|EMBL:CDI81378.1} (Fragment) OS=Eimeria acervulina (Coccidian parasite) PE=4 SV=1	Intraconoid microtubule associated protein 1, related, partial [Eimeria acervulina]	Eimeria tenella clone Etm102E11 hypothetical protein mRNA, complete cds
EVM0003569	4.11306	5.75529	1.63385	3.52253	0.00042745	0.00174063	0	0	0	1.77338	1.789	1.24575	#N/A	#N/A	#N/A	#N/A	#N/A	#N/A	#N/A	#N/A	#N/A	#N/A	#N/A
EVM0002339	33.818	-1.8628	0.529906	-3.51535	0.000439174	0.00178354	0.154944	0.195822	0.14527	0.0367921	0	0.0895974	--	--	--	--	[N]	Cell motility	Tctex-1 family	--	WD domain-containing protein, putative {ECO:0000313|EMBL:CDI80606.1} OS=Eimeria acervulina (Coccidian parasite) PE=4 SV=1	WD domain-containing protein, putative [Eimeria acervulina]	--
EVM0006580	49.4958	-1.12038	0.319193	-3.51005	0.000448028	0.00181556	0.903902	1.14058	1.24535	0.575726	0.365687	0.554221	--	--	--	--	--	--	--	--	Uncharacterized protein {ECO:0000313|EMBL:CDJ65955.1} OS=Eimeria necatrix PE=4 SV=1	hypothetical protein, conserved [Eimeria necatrix]	Drosophila mojavensis GI18131 (Dmoj\GI18131), mRNA
EVM0004879	43.0799	1.22828	0.353041	3.47913	0.00050304	0.00201463	0.937533	0.378212	0.649481	2.04722	1.45648	1.09344	--	--	--	--	--	--	--	--	Uncharacterized protein {ECO:0000313|EMBL:CDJ38005.1} OS=Eimeria tenella (Coccidian parasite) PE=4 SV=1	hypothetical protein, conserved [Eimeria tenella]	Drosophila virilis GJ16511 (Dvir\GJ16511), mRNA
EVM0005884	12.3524	-2.48946	0.71586	-3.47758	0.000505971	0.00202523	0.519628	0.598926	0.18513	0.0562646	0.0252267	0.140531	--	--	--	--	--	--	--	--	Uncharacterized protein {ECO:0000313|EMBL:CDJ39941.1} OS=Eimeria tenella (Coccidian parasite) PE=4 SV=1	hypothetical protein, conserved [Eimeria tenella]	Spirometra erinaceieuropaei genome assembly S_erinaceieuropaei ,scaffold SPER_contig0174693
EVM0001288	18.5297	1.86251	0.547822	3.39984	0.000674247	0.00262191	1.08094	0.660704	0.486252	3.28075	2.38533	2.40845	#N/A	#N/A	#N/A	#N/A	#N/A	#N/A	#N/A	#N/A	#N/A	#N/A	#N/A
EVM0006100	719.743	1.3975	0.41212	3.39099	0.000696394	0.00269965	20.4475	16.242	15.1944	54.6803	48.6464	33.3661	--	--	--	--	[R]	General function prediction only	Methyltransferase domain	--	Uncharacterized protein {ECO:0000313|EMBL:CDJ41365.1} OS=Eimeria tenella (Coccidian parasite) PE=4 SV=1	hypothetical protein, conserved [Eimeria tenella]	Spirometra erinaceieuropaei genome assembly S_erinaceieuropaei ,scaffold SPER_scaffold0047983
EVM0004861	60.7288	-1.01112	0.299795	-3.37269	0.000744369	0.00286199	4.06105	5.20088	6.09551	2.74828	2.79302	2.1165	--	--	--	--	--	--	--	--	--	--	Onchocerca flexuosa genome assembly O_flexuosa_Cordoba ,scaffold OFLC_contig0013781
EVM0004417	25.8221	-1.63941	0.487151	-3.3653	0.0007646	0.00292847	0.308514	0.385228	0.534311	0.139189	0.18722	0.0782214	--	--	Molecular Function: hydrolase activity (GO:0016787);;	--	[H]	Coenzyme transport and metabolism	Peptidase C26	Gamma-glutamyl hydrolase B (Precursor) GN=gghB OS=Dictyostelium discoideum (Slime mold) PE=3 SV=1	Gamma-glutamyl hydrolase, putative {ECO:0000313|EMBL:CDJ41888.1} OS=Eimeria tenella (Coccidian parasite) PE=4 SV=1	gamma-glutamyl hydrolase, putative [Eimeria tenella]	Hammondia hammondi gamma-glutamyl hydrolase partial mRNA
EVM0004091	19.8703	-1.66762	0.495682	-3.36429	0.000767399	0.00293401	1.29524	0.894186	0.961376	0.219136	0.196503	0.547331	--	--	--	--	--	--	--	--	Uncharacterized protein {ECO:0000313|EMBL:CDJ44413.1} OS=Eimeria tenella (Coccidian parasite) PE=4 SV=1	hypothetical protein, conserved [Eimeria tenella]	Eimeria tenella chromosome 1, ordered contigs
EVM0001524	17.877	-1.9201	0.572419	-3.35436	0.000795477	0.00303044	3.50425	2.72474	4.95426	1.05399	1.41769	0.564113	--	--	--	--	--	--	--	--	Uncharacterized protein {ECO:0000313|EMBL:CDJ38538.1} OS=Eimeria tenella (Coccidian parasite) PE=4 SV=1	hypothetical protein, conserved [Eimeria tenella]	--
EVM0006187	2.6727	-5.38363	1.60572	-3.35278	0.000800036	0.00304484	1.0885	3.39791	1.61585	0	0	0	#N/A	#N/A	#N/A	#N/A	#N/A	#N/A	#N/A	#N/A	#N/A	#N/A	#N/A
EVM0005133	60.7161	-1.03033	0.310095	-3.32264	0.000891698	0.00335795	4.93164	5.49475	4.03462	2.31396	2.63361	2.16732	--	--	--	--	--	--	--	--	Uncharacterized protein {ECO:0000313|EMBL:CDJ40377.1} (Fragment) OS=Eimeria tenella (Coccidian parasite) PE=4 SV=1	hypothetical protein, conserved, partial [Eimeria tenella]	Haliotis discus hannai clone CHh475 microsatellite sequence
EVM0006575	32.8547	-1.14479	0.344819	-3.31999	0.000900223	0.00338158	1.36633	1.64809	2.01256	0.659441	1.00269	0.644507	--	--	--	--	--	--	tRNA synthetases class I (M)	--	Uncharacterized protein {ECO:0000313|EMBL:CDJ69400.1} OS=Eimeria necatrix PE=4 SV=1	hypothetical protein, conserved [Eimeria necatrix]	Eimeria maxima imp-1 gene for immune mapped protein 1, exons 1-4, strain Weybridge, clone EmaxBAC2k08
EVM0002584	44.8633	-1.17184	0.355172	-3.29936	0.000969061	0.00361305	4.39387	4.65318	5.46336	2.43981	1.64086	2.28519	--	--	Molecular Function: transferase activity, transferring phosphorus-containing groups (GO:0016772);;	K12572|1.40993e-13|cho:Chro.20350|PABP1-dependent poly A-specific ribonuclease subunit PAN3; PABP-dependent poly(A) nuclease 3; K12572 PAB-dependent poly(A)-specific ribonuclease subunit 3 (A)	[A]	RNA processing and modification	--	PAB-dependent poly(A)-specific ribonuclease subunit PAN3 {ECO:0000255|HAMAP-Rule:MF_03181} GN=pan3 OS=Dictyostelium discoideum (Slime mold) PE=3 SV=1	Poly(A) ribonuclease subunit, related {ECO:0000313|EMBL:CDJ38119.1} OS=Eimeria tenella (Coccidian parasite) PE=4 SV=1	Poly(A) ribonuclease subunit, related [Eimeria tenella]	--
EVM0003933	52.0776	-1.12075	0.344579	-3.25252	0.00114388	0.00421461	3.77173	4.55969	4.24755	1.23224	2.20994	2.36326	[O]	Posttranslational modification, protein turnover, chaperones	Cellular Component: membrane (GO:0016020);; Biological Process: regulation of cell proliferation (GO:0042127);;	K17080|3.16769e-158|tgo:TGME49_043950|prohibitin, putative; K17080 prohibitin 1 (A)	[O]	Posttranslational modification, protein turnover, chaperones	SPFH domain / Band 7 family	Prohibitin-1, mitochondrial (Precursor) GN=phbA OS=Dictyostelium discoideum (Slime mold) PE=3 SV=1	Prohibitin, putative {ECO:0000313|EMBL:CDJ42242.1} OS=Eimeria tenella (Coccidian parasite) PE=4 SV=1	prohibitin, putative [Eimeria tenella]	Eimeria tenella clone Etm084G08 hypothetical protein mRNA, complete cds
EVM0004397	33.1326	-1.91987	0.591689	-3.24473	0.00117562	0.00432733	0.806297	5.03393	0.648336	0.36377	0.489298	0.851794	#N/A	#N/A	#N/A	#N/A	#N/A	#N/A	#N/A	#N/A	#N/A	#N/A	#N/A
EVM0001435	25.7995	1.56495	0.482353	3.2444	0.00117698	0.0043302	0.55779	0.107152	1.03043	1.64413	1.76016	1.6028	--	--	--	--	--	--	--	--	Uncharacterized protein {ECO:0000313|EMBL:CDJ41863.1} OS=Eimeria tenella (Coccidian parasite) PE=2 SV=1	hypothetical protein [Eimeria tenella]	Eimeria tenella clone Etm032G09 hypothetical protein mRNA, complete cds
EVM0000477	31.9895	-1.41497	0.43687	-3.23888	0.00120001	0.00441062	1.93999	3.06908	4.96918	1.44158	1.24653	1.0609	[P]	Inorganic ion transport and metabolism	--	K01530|1.44381e-19|tgo:TGME49_047690|p-type ATPase2, putative (EC:3.6.3.1); K01530 phospholipid-translocating ATPase [EC:3.6.3.1] (A)	[R]	General function prediction only	--	--	ATPase 2, putative {ECO:0000313|EMBL:CDJ44583.1} OS=Eimeria tenella (Coccidian parasite) PE=4 SV=1	ATPase 2, putative [Eimeria tenella]	Spirometra erinaceieuropaei genome assembly S_erinaceieuropaei ,scaffold SPER_scaffold0052067
EVM0003199	44.5324	1.06579	0.329278	3.23674	0.00120903	0.00443725	3.44574	3.19933	2.15972	5.70014	5.15788	7.47449	--	--	--	--	--	--	--	--	Uncharacterized protein {ECO:0000313|EMBL:CDJ42033.1} OS=Eimeria tenella (Coccidian parasite) PE=4 SV=1	hypothetical protein ETH_00011070 [Eimeria tenella]	Drosophila mojavensis GI12756 (Dmoj\GI12756), mRNA
EVM0004810	62.0507	-1.1225	0.348306	-3.22275	0.00126968	0.00462815	7.42465	10.2776	12.7506	4.13788	7.95109	2.39922	--	--	--	--	--	--	--	--	Uncharacterized protein {ECO:0000313|EMBL:CDJ43016.1} OS=Eimeria tenella (Coccidian parasite) PE=4 SV=1	hypothetical protein, conserved [Eimeria tenella]	--
EVM0007110	56.4626	1.02619	0.318478	3.22218	0.00127219	0.00463508	1.33852	0.84984	0.853175	1.98567	1.87236	2.32	--	--	--	--	--	--	--	--	Uncharacterized protein {ECO:0000313|EMBL:CDJ43128.1} OS=Eimeria tenella (Coccidian parasite) PE=4 SV=1	hypothetical protein, conserved [Eimeria tenella]	--
EVM0003108	36.129	-1.1818	0.368371	-3.20819	0.00133574	0.00484778	1.23292	0.685606	0.915122	0.38059	0.492234	0.383893	--	--	--	--	--	--	--	--	Uncharacterized protein {ECO:0000313|EMBL:CDJ40400.1} OS=Eimeria tenella (Coccidian parasite) PE=4 SV=1	hypothetical protein, conserved [Eimeria tenella]	Spirometra erinaceieuropaei genome assembly S_erinaceieuropaei ,scaffold SPER_contig0089586
EVM0003124	40.3672	-1.17227	0.365721	-3.20538	0.00134885	0.00489064	1.20726	1.08051	1.35768	0.519909	0.266407	0.788416	--	--	--	--	--	--	--	--	Uncharacterized protein {ECO:0000313|EMBL:CDJ40148.1} OS=Eimeria tenella (Coccidian parasite) PE=4 SV=1	hypothetical protein, conserved [Eimeria tenella]	Drosophila virilis GJ16544 (Dvir\GJ16544), mRNA
EVM0000949	9.22667	-2.50915	0.788853	-3.18076	0.00146891	0.0052725	1.99824	1.70606	2.19729	0.801359	0	0.187644	--	--	--	--	--	--	--	--	--	--	Eimeria tenella chromosome 1, ordered contigs
EVM0001054	28.4863	-1.42498	0.448314	-3.17853	0.00148023	0.00530803	6.12955	8.9153	7.10602	1.58024	2.97576	3.70024	--	--	--	--	--	--	--	--	--	--	Haliotis discus hannai clone CHh522 microsatellite sequence
EVM0000863	26.21	1.50138	0.473275	3.17232	0.00151227	0.00541776	0.552064	0.275735	0.633766	1.7136	1.25967	1.1571	[Z]	Cytoskeleton	--	--	[Z]	Cytoskeleton	Myosin head (motor domain)	Myosin heavy chain, non-muscle GN=zip OS=Drosophila melanogaster (Fruit fly) PE=1 SV=2	Uncharacterized protein {ECO:0000313|EMBL:CDJ39887.1} OS=Eimeria tenella (Coccidian parasite) PE=4 SV=1	hypothetical protein ETH_00024275 [Eimeria tenella]	Toxoplasma gondii ME49 myosin IJ heavy chain, putative, mRNA
EVM0005011	54.7925	-1.0156	0.322372	-3.15038	0.00163059	0.00580478	1.13735	1.94589	1.86424	1.12247	0.647058	0.660839	--	--	--	--	--	--	--	--	Uncharacterized protein {ECO:0000313|EMBL:CDJ41798.1} OS=Eimeria tenella (Coccidian parasite) PE=4 SV=1	hypothetical protein, conserved [Eimeria tenella]	Eimeria tenella chromosome 1, ordered contigs
EVM0000702	41.0678	1.16658	0.370596	3.14785	0.00164478	0.00583956	0.590771	0.529609	0.49371	1.55181	0.987887	1.07624	--	--	--	--	--	--	--	--	Uncharacterized protein {ECO:0000313|EMBL:CDJ41364.1} OS=Eimeria tenella (Coccidian parasite) PE=4 SV=1	hypothetical protein, conserved [Eimeria tenella]	--
EVM0002904	18.2998	1.66494	0.52926	3.14579	0.00165642	0.00586949	0.820258	0.181814	0.811769	1.53721	2.06766	2.13303	--	--	--	--	--	--	--	--	Uncharacterized protein {ECO:0000313|EMBL:CDJ37385.1} OS=Eimeria tenella (Coccidian parasite) PE=4 SV=1	hypothetical protein, conserved [Eimeria tenella]	--
EVM0005666	9.71542	-3.56128	1.13239	-3.14492	0.00166134	0.00588166	0.372164	0.834086	0.214849	0.083953	0.0376411	0	--	--	--	--	--	--	--	Protein PF14_0175 GN=PF14_0175 OS=Plasmodium falciparum (isolate 3D7) PE=3 SV=1	Uncharacterized protein {ECO:0000313|EMBL:CDJ40784.1} OS=Eimeria tenella (Coccidian parasite) PE=4 SV=1	hypothetical protein, conserved [Eimeria tenella]	Drosophila persimilis GL14218 (Dper\GL14218), mRNA
EVM0008101	14.5541	-2.05768	0.654788	-3.14251	0.00167506	0.00592464	2.23691	3.22284	3.19765	0.336402	1.0558	0.735196	--	--	--	--	--	--	--	--	Uncharacterized protein {ECO:0000313|EMBL:CDJ40883.1} OS=Eimeria tenella (Coccidian parasite) PE=4 SV=1	hypothetical protein, conserved [Eimeria tenella]	Drosophila virilis GJ22138 (Dvir\GJ22138), mRNA
EVM0006877	34.2019	1.24785	0.399382	3.12446	0.00178132	0.00626801	0.5663	0.362622	0.311355	0.965194	1.42554	0.58496	--	--	--	--	--	--	--	--	Uncharacterized protein {ECO:0000313|EMBL:CDJ37907.1} OS=Eimeria tenella (Coccidian parasite) PE=4 SV=1	hypothetical protein, conserved [Eimeria tenella]	--
EVM0001306	7.96959	2.62076	0.842606	3.1103	0.00186896	0.00654267	0.166086	0.398815	0.164367	1.94822	1.20946	1.33348	--	--	--	--	--	--	--	--	Uncharacterized protein {ECO:0000313|EMBL:CDJ68015.1} (Fragment) OS=Eimeria necatrix PE=4 SV=1	hypothetical protein ENH_00046530, partial [Eimeria necatrix]	--
EVM0007569	29.8799	1.19639	0.385521	3.10331	0.00191371	0.00668375	3.15234	4.70997	2.77308	8.21723	5.95151	10.0647	--	--	--	--	--	--	--	--	Uncharacterized protein {ECO:0000313|EMBL:CDJ35903.1} OS=Eimeria mitis PE=4 SV=1	hypothetical protein, conserved [Eimeria mitis]	--
EVM0006150	23.1074	1.27009	0.409415	3.10221	0.00192081	0.0067023	2.98954	2.27325	2.09568	5.05787	5.59376	7.05339	--	--	--	--	--	--	--	--	Uncharacterized protein {ECO:0000313|EMBL:CDJ49561.1} OS=Eimeria brunetti PE=4 SV=1	hypothetical protein EBH_0027120 [Eimeria brunetti]	Eimeria tenella chromosome 1, ordered contigs
EVM0006464	38.6702	-1.24993	0.404444	-3.0905	0.00199822	0.00693695	2.13281	2.04858	2.11074	0.423387	0.465944	1.69438	--	--	--	--	--	--	--	--	Uncharacterized protein {ECO:0000313|EMBL:CDJ68750.1} OS=Eimeria necatrix PE=4 SV=1	hypothetical protein, conserved [Eimeria necatrix]	--
EVM0006075	49.3343	-1.03508	0.337868	-3.06356	0.0021872	0.00752691	2.69167	5.72473	4.94708	1.90831	1.98345	2.59982	--	--	--	--	--	--	--	--	Uncharacterized protein {ECO:0000313|EMBL:CDJ45264.1} (Fragment) OS=Eimeria tenella (Coccidian parasite) PE=4 SV=1	hypothetical protein, conserved, partial [Eimeria tenella]	Drosophila virilis clone V2 non-LTR retrotransposon TART tandem array, partial sequence
EVM0006261	46.6875	-1.03819	0.341303	-3.04184	0.00235138	0.00800749	1.26983	1.24314	1.86087	0.616969	0.563126	0.928722	[Z]	Cytoskeleton	--	--	[Z]	Cytoskeleton	Myosin head (motor domain)	High molecular weight form of myosin-1 OS=Acanthamoeba castellanii (Amoeba) PE=3 SV=1	Myosin F (TgMyoF) protein, putative {ECO:0000313|EMBL:CDJ40053.1} OS=Eimeria tenella (Coccidian parasite) PE=4 SV=1	myosin F (TgMyoF) protein, putative [Eimeria tenella]	Salpingoeca sp. ATCC 50818 hypothetical protein (PTSG_05395) mRNA, complete cds
EVM0006017	32.2535	1.15537	0.379923	3.04106	0.00235748	0.00802462	0.369202	0.967146	0.763978	1.48398	1.58871	1.61687	--	--	--	--	--	--	--	--	Uncharacterized protein {ECO:0000313|EMBL:CDJ43370.1} OS=Eimeria tenella (Coccidian parasite) PE=4 SV=1	hypothetical protein ETH_00008365 [Eimeria tenella]	--
EVM0004143	24.9959	-1.33352	0.441505	-3.02039	0.00252448	0.00850822	0.67838	0.637107	0.387896	0.204039	0.274448	0.20385	--	--	--	--	--	--	--	--	Phosphatidylinositol 3-and 4-kinase domain-containing protein, putative {ECO:0000313|EMBL:CDJ58489.1} OS=Eimeria maxima (Coccidian parasite) PE=4 SV=1	phosphatidylinositol 3-and 4-kinase domain-containing protein, putative [Eimeria maxima]	Spirometra erinaceieuropaei genome assembly S_erinaceieuropaei ,scaffold SPER_scaffold0049714
EVM0002397	11.9821	-1.9672	0.654052	-3.00772	0.00263216	0.00881182	1.59193	0.849476	2.62576	0.478812	0.536699	0.29898	--	--	--	--	--	--	--	--	--	--	Eimeria tenella chromosome 1, ordered contigs
EVM0000187	9.16304	-2.3396	0.783073	-2.98772	0.00281068	0.0093263	1.0885	1.30689	4.30894	0.613861	0.495414	0.229984	#N/A	#N/A	#N/A	#N/A	#N/A	#N/A	#N/A	#N/A	#N/A	#N/A	#N/A
EVM0004841	37.2616	-1.05462	0.353248	-2.98551	0.00283109	0.0093733	8.75097	10.0149	9.76598	6.21615	3.84163	3.61923	--	--	--	--	--	--	--	--	Uncharacterized protein {ECO:0000313|EMBL:CDJ38493.1} OS=Eimeria tenella (Coccidian parasite) PE=4 SV=1	hypothetical protein, conserved [Eimeria tenella]	Drosophila grimshawi GH18851 (Dgri\GH18851), mRNA
EVM0002410	24.525	-1.32389	0.445043	-2.97474	0.00293236	0.00964902	4.81078	4.62078	4.32817	2.63083	1.76934	1.10885	#N/A	#N/A	#N/A	#N/A	#N/A	#N/A	#N/A	#N/A	#N/A	#N/A	#N/A
EVM0008048	18.6598	1.38694	0.466722	2.97167	0.00296187	0.00972909	1.09298	0.524908	1.02759	2.81074	1.85717	2.21694	--	--	--	--	--	--	--	--	Uncharacterized protein {ECO:0000313|EMBL:CDJ43633.1} OS=Eimeria tenella (Coccidian parasite) PE=4 SV=1	hypothetical protein, conserved [Eimeria tenella]	--

## Sheet: T2_VS_T0
Supplementary Dataset 3: Differentially expressed genes between 2h of toltrazuril treatment and untreatment(T2 vs. T0).
	baseMean	log2FoldChange	lfcSE	stat	pvalue	padj	T0-1	T0-2	T0-3	T2-1	T2-2	T2-3	COG_class	COG_class_annotation	GO_annotation	KEGG_annotation	KOG_class	KOG_class_annotation	Pfam_annotation	Swissprot_annotation	TrEMBL_annotation	nr_annotation	nt_annotation
EVM0007384	7.18871	4.70792	1.39282	3.38012	0.000724536	0.00296672	0	0	0.0647671	1.15895	0.469781	0.338438	[R]	General function prediction only	--	--	[R]	General function prediction only	DHHC palmitoyltransferase	Zinc finger DHHC domain-containing protein 4 GN=dhhc-4 OS=Caenorhabditis elegans PE=3 SV=1	Palmitoyltransferase {ECO:0000256|RuleBase:RU079119} OS=Eimeria acervulina (Coccidian parasite) PE=3 SV=1	zinc finger DHHC domain-containing protein, conserved, putative [Eimeria acervulina]	Toxoplasma gondii ME49 zinc finger DHHC domain-containing protein, conserved, mRNA
EVM0003734	5.58389	3.17545	1.0215	3.10863	0.00187957	0.006779	0.629239	0	0.585903	3.7003	4.24978	3.67393	--	--	--	--	--	--	--	--	Uncharacterized protein {ECO:0000313|EMBL:CDJ44411.1} OS=Eimeria tenella (Coccidian parasite) PE=4 SV=1	hypothetical protein, conserved [Eimeria tenella]	--
EVM0006106	8.15312	2.51853	0.825569	3.05066	0.00228335	0.00801135	0.487153	0.981253	0.226801	3.34221	2.63212	4.02947	#N/A	#N/A	#N/A	#N/A	#N/A	#N/A	#N/A	#N/A	#N/A	#N/A	#N/A
EVM0003429	8.57089	2.37695	0.754322	3.15111	0.00162653	0.00603559	0.0978092	0.0788053	0.0364292	0.306761	0.449199	0.399754	--	--	--	--	--	--	--	--	Uncharacterized protein {ECO:0000313|EMBL:CDJ41566.1} OS=Eimeria tenella (Coccidian parasite) PE=4 SV=1	hypothetical protein, conserved [Eimeria tenella]	--
EVM0003870	12.0925	2.09768	0.625093	3.35578	0.000791409	0.00321726	0.0966683	0.292073	0.157519	0.73427	1.07725	0.634968	--	--	--	--	--	--	--	--	Uncharacterized protein {ECO:0000313|EMBL:CDJ43114.1} OS=Eimeria tenella (Coccidian parasite) PE=4 SV=1	hypothetical protein, conserved [Eimeria tenella]	--
EVM0000277	15.8157	1.69467	0.494374	3.4279	0.000608262	0.0025315	0.252681	0.133938	0.136214	0.625648	0.556879	0.582364	--	--	--	--	--	--	--	--	Uncharacterized protein {ECO:0000313|EMBL:CDJ42421.1} OS=Eimeria tenella (Coccidian parasite) PE=4 SV=1	hypothetical protein, conserved [Eimeria tenella]	Anopheles gambiae str. PEST AGAP013287-PA (AgaP_AGAP013287) mRNA, complete cds
EVM0001418	39.6545	1.63342	0.359422	4.54457	5.50466e-06	3.8226e-05	1.71611	3.0246	2.47677	8.99846	5.44744	8.85083	#N/A	#N/A	#N/A	#N/A	#N/A	#N/A	#N/A	#N/A	#N/A	#N/A	#N/A
EVM0008083	19.075	1.61468	0.490035	3.29503	0.000984123	0.00387848	3.11884	2.31448	1.52844	6.75707	6.20837	9.26469	--	--	--	--	--	--	--	--	Uncharacterized protein {ECO:0000313|EMBL:CDI84474.1} (Fragment) OS=Eimeria acervulina (Coccidian parasite) PE=4 SV=1	hypothetical protein, conserved, partial [Eimeria acervulina]	--
EVM0002373	138.372	1.5258	0.229345	6.65287	2.87437e-11	4.97367e-10	1.855	1.27514	1.54904	5.20896	4.27556	4.58445	--	--	--	--	--	--	--	--	Uncharacterized protein {ECO:0000313|EMBL:CDJ42446.1} OS=Eimeria tenella (Coccidian parasite) PE=4 SV=1	hypothetical protein [Eimeria tenella strain Houghton]	Eimeria tenella hypothetical protein (e2017b09.tmp0041) mRNA, complete cds
EVM0000368	42.0905	1.45387	0.379749	3.82852	0.000128918	0.000644066	6.90365	5.21466	12.2537	27.9108	28.5585	13.4361	#N/A	#N/A	#N/A	#N/A	#N/A	#N/A	#N/A	#N/A	#N/A	#N/A	#N/A
EVM0001037	45.0241	1.4338	0.334859	4.2818	1.85388e-05	0.000113235	1.26051	2.04223	1.58194	4.67312	5.62616	3.51986	#N/A	#N/A	#N/A	#N/A	#N/A	#N/A	#N/A	#N/A	#N/A	#N/A	#N/A
EVM0000632	23.7101	1.39489	0.435214	3.20507	0.00135028	0.00512912	1.21976	2.10592	3.894	5.97741	6.59042	7.4609	--	--	--	--	--	--	--	--	Uncharacterized protein {ECO:0000313|EMBL:CDJ40799.1} (Fragment) OS=Eimeria tenella (Coccidian parasite) PE=4 SV=1	hypothetical protein ETH_00041785, partial [Eimeria tenella]	Haliotis discus hannai clone CHh533 microsatellite sequence
EVM0000702	41.0678	1.39308	0.372641	3.73841	0.000185188	0.00088837	0.353071	0.474118	1.04888	2.15866	1.40804	1.58701	--	--	--	--	--	--	--	--	Uncharacterized protein {ECO:0000313|EMBL:CDJ41364.1} OS=Eimeria tenella (Coccidian parasite) PE=4 SV=1	hypothetical protein, conserved [Eimeria tenella]	--
EVM0001295	85.4592	1.34929	0.222392	6.06714	1.30212e-09	1.78987e-08	4.39352	5.63811	6.20238	15.4186	13.1136	14.6881	--	--	--	--	--	--	--	--	Uncharacterized protein {ECO:0000313|EMBL:CDI81222.1} OS=Eimeria praecox PE=4 SV=1	hypothetical protein EPH_0051950 [Eimeria praecox]	Monosiga brevicollis MX1 predicted protein MONBRDRAFT_8906 mRNA, complete cds
EVM0006017	32.2535	1.34208	0.382553	3.50821	0.000451129	0.00193333	1.16057	0.649358	0.720427	2.0643	2.2644	2.38422	--	--	--	--	--	--	--	--	Uncharacterized protein {ECO:0000313|EMBL:CDJ43370.1} OS=Eimeria tenella (Coccidian parasite) PE=4 SV=1	hypothetical protein ETH_00008365 [Eimeria tenella]	--
EVM0002919	30.5381	1.25808	0.371689	3.38476	0.000712402	0.00292682	0.556785	0.212177	0.308261	0.84068	0.813066	1.0397	--	--	--	--	--	--	--	--	Uncharacterized protein {ECO:0000313|EMBL:CDJ37343.1} OS=Eimeria tenella (Coccidian parasite) PE=4 SV=1	hypothetical protein, conserved [Eimeria tenella]	--
EVM0006105	57.2504	1.24096	0.278357	4.45814	8.26731e-06	5.51562e-05	1.62449	1.31795	2.14286	3.9804	4.99814	3.68857	--	--	--	--	--	--	--	--	Uncharacterized protein {ECO:0000313|EMBL:CDJ68584.1} (Fragment) OS=Eimeria necatrix PE=4 SV=1	hypothetical protein ENH_00055590, partial [Eimeria necatrix]	Neospora caninum Liverpool hypothetical protein (NCLIV_054310) mRNA, complete cds
EVM0000757	198.188	1.23147	0.21821	5.64349	1.66635e-08	1.92678e-07	37.4993	22.3517	23.5153	58.9548	65.5384	80.7271	#N/A	#N/A	#N/A	#N/A	#N/A	#N/A	#N/A	#N/A	#N/A	#N/A	#N/A
EVM0007239	240.028	1.21234	0.16355	7.41266	1.23788e-13	2.97495e-12	4.73768	4.13397	4.32209	9.79436	9.84538	12.375	--	--	--	--	--	--	--	--	AGAP004734-PA, related {ECO:0000313|EMBL:CDJ37760.1} OS=Eimeria tenella (Coccidian parasite) PE=4 SV=1	AGAP004734-PA, related [Eimeria tenella]	--
EVM0007015	214.871	1.20757	0.15959	7.56669	3.82853e-14	1.00471e-12	4.65732	4.32216	6.22104	11.3518	12.022	13.4539	--	--	--	--	--	--	--	--	Uncharacterized protein {ECO:0000313|EMBL:CDJ40284.1} OS=Eimeria tenella (Coccidian parasite) PE=4 SV=1	hypothetical protein, conserved [Eimeria tenella]	--
EVM0004939	51.8972	1.17177	0.30326	3.86392	0.000111583	0.000567486	1.31926	1.0046	1.64785	3.50057	3.56402	2.31708	--	--	--	--	--	--	--	--	Uncharacterized protein {ECO:0000313|EMBL:CDJ42459.1} OS=Eimeria tenella (Coccidian parasite) PE=4 SV=1	hypothetical protein ETH_00018590 [Eimeria tenella]	Eimeria tenella chromosome 1, ordered contigs
EVM0003501	30.455	1.15918	0.384794	3.01247	0.00259133	0.00891332	0.311132	0.544241	0.259209	0.898772	0.729938	0.956107	--	--	--	--	--	--	--	--	Uncharacterized protein {ECO:0000313|EMBL:CDJ37063.1} OS=Eimeria tenella (Coccidian parasite) PE=4 SV=1	hypothetical protein, conserved [Eimeria tenella]	PREDICTED: Bombus impatiens hypothetical LOC100742837 (LOC100742837), miscRNA
EVM0006025	48.4009	1.15261	0.317957	3.62503	0.000288924	0.00130754	0.850629	0.782199	0.723171	1.48616	2.19809	1.81747	--	--	--	--	--	--	--	--	Uncharacterized protein {ECO:0000313|EMBL:CDJ38342.1} OS=Eimeria tenella (Coccidian parasite) PE=4 SV=1	hypothetical protein, conserved [Eimeria tenella]	--
EVM0002874	97.8283	1.13442	0.221717	5.11652	3.11216e-07	2.7979e-06	2.94019	2.99168	3.1046	7.10022	6.79661	6.84314	[K]	Transcription	Molecular Function: hydrolase activity (GO:0016787);; Molecular Function: organic cyclic compound binding (GO:0097159);; Molecular Function: heterocyclic compound binding (GO:1901363);;	K03685|4.71576e-07|acan:ACA1_291000|ribonuclease III, putative; K03685 ribonuclease III [EC:3.1.26.3] (A)	[A]	RNA processing and modification	Ribonuclease III domain	--	Uncharacterized protein {ECO:0000313|EMBL:CDJ43590.1} OS=Eimeria tenella (Coccidian parasite) PE=4 SV=1	hypothetical protein, conserved [Eimeria tenella]	--
EVM0003273	494.411	1.09963	0.148168	7.42155	1.15761e-13	2.79116e-12	110.998	87.7307	118.118	258.954	239.502	211.017	#N/A	#N/A	#N/A	#N/A	#N/A	#N/A	#N/A	#N/A	#N/A	#N/A	#N/A
EVM0002496	44.99	1.09014	0.32001	3.40659	0.0006578	0.00272073	5.81621	5.08693	5.84319	10.5009	10.7508	16.0858	#N/A	#N/A	#N/A	#N/A	#N/A	#N/A	#N/A	#N/A	#N/A	#N/A	#N/A
EVM0001192	143.79	1.07938	0.203472	5.30481	1.12789e-07	1.11038e-06	1.65087	2.02259	2.23444	4.30358	3.63227	5.11755	--	--	--	--	[R]	General function prediction only	Zinc finger C-x8-C-x5-C-x3-H type (and similar)	Protein TIS11 GN=Tis11 OS=Drosophila melanogaster (Fruit fly) PE=2 SV=2	Uncharacterized protein {ECO:0000313|EMBL:CDJ38036.1} OS=Eimeria tenella (Coccidian parasite) PE=4 SV=1	hypothetical protein, conserved [Eimeria tenella]	--
EVM0003561	175.3	1.04642	0.174607	5.99298	2.06029e-09	2.73986e-08	10.8257	10.3357	12.2942	26.0657	24.428	21.7391	--	--	--	K12343|3.51231e-59|tgo:TGME49_104480|3-oxo-5 alpha-steroid delta 4-dehydrogenase alpha 2, putative (EC:1.3.99.5); K12343 3-oxo-5-alpha-steroid 4-dehydrogenase 1 [EC:1.3.1.22] (A)	[I]	Lipid transport and metabolism	3-oxo-5-alpha-steroid 4-dehydrogenase	Very-long-chain enoyl-CoA reductase GN=gpsn2 OS=Dictyostelium discoideum (Slime mold) PE=3 SV=1	3-oxo-5 alpha-steroid delta 4-dehydrogenase alpha 2, putative {ECO:0000313|EMBL:CDJ53337.1} OS=Eimeria brunetti PE=4 SV=1	3-oxo-5 alpha-steroid delta 4-dehydrogenase alpha 2, putative [Eimeria brunetti]	--
EVM0004154	459.631	1.04605	0.121686	8.59632	8.23151e-18	3.36303e-16	7.02118	5.30751	6.34134	13.2702	12.4847	14.58	--	--	--	--	--	--	--	--	Uncharacterized protein {ECO:0000313|EMBL:CDJ42389.1} OS=Eimeria tenella (Coccidian parasite) PE=4 SV=1	hypothetical protein, conserved [Eimeria tenella]	--
EVM0004767	192.565	1.0452	0.147302	7.09561	1.28778e-12	2.71357e-11	6.54669	5.85362	5.41189	13.271	11.9489	13.1453	--	--	--	--	--	--	--	--	Uncharacterized protein {ECO:0000313|EMBL:CDJ37773.1} OS=Eimeria tenella (Coccidian parasite) PE=4 SV=1	hypothetical protein, conserved [Eimeria tenella]	--
EVM0008201	423.38	1.043	0.133287	7.8252	5.06869e-15	1.52767e-13	12.9046	10.4721	13.3125	25.7808	27.3379	26.0488	--	--	--	--	--	--	Major Facilitator Superfamily	--	Uncharacterized protein {ECO:0000313|EMBL:CDJ38208.1} OS=Eimeria tenella (Coccidian parasite) PE=4 SV=1	hypothetical protein ETH_00009430 [Eimeria tenella]	Hammondia hammondi transporter, major facilitator family protein partial mRNA
EVM0007788	52.3426	1.03921	0.326819	3.17977	0.00147392	0.00554721	5.68878	7.27781	5.58331	12.658	18.0683	9.27625	--	--	--	--	--	--	--	--	Uncharacterized protein {ECO:0000313|EMBL:CDJ41267.1} OS=Eimeria tenella (Coccidian parasite) PE=4 SV=1	hypothetical protein ETH_00011760 [Eimeria tenella]	Paramecium tetraurelia hypothetical protein (GSPATT00011627001) partial mRNA
EVM0001097	137.062	1.03507	0.211525	4.89338	9.91196e-07	8.07226e-06	2.56705	2.00156	2.00473	4.57202	5.891	3.6799	--	--	--	--	--	--	--	--	Uncharacterized protein {ECO:0000313|EMBL:CDJ37551.1} OS=Eimeria tenella (Coccidian parasite) PE=4 SV=1	hypothetical protein, conserved [Eimeria tenella]	--
EVM0005215	556.825	1.03415	0.135737	7.61881	2.5603e-14	6.99942e-13	13.6347	12.709	14.5871	29.8337	30.2242	27.6144	--	--	--	--	--	--	RIC1	--	Uncharacterized protein {ECO:0000313|EMBL:CDJ40142.1} OS=Eimeria tenella (Coccidian parasite) PE=4 SV=1	hypothetical protein ETH_00012150 [Eimeria tenella]	--
EVM0007062	40.0667	1.03161	0.342802	3.00934	0.00261815	0.00898873	7.87082	5.02684	5.18375	11.6654	15.5585	11.5822	--	--	--	--	--	--	--	--	--	--	PREDICTED: Bactrocera cucurbitae putative uncharacterized protein DDB_G0271606 (LOC105211795), transcript variant X5, mRNA
EVM0000342	49.3546	1.02942	0.290647	3.54182	0.00039737	0.00173259	7.78249	4.89874	7.63471	13.3483	17.8334	12.4418	[TZDR]	--	--	--	[T]	Signal transduction mechanisms	EF hand	Calmodulin OS=Tetrahymena pyriformis PE=1 SV=4	EF-hand domain-containing protein, putative {ECO:0000313|EMBL:CDJ39770.1} OS=Eimeria tenella (Coccidian parasite) PE=4 SV=1	EF-hand domain-containing protein, putative [Eimeria tenella]	--
EVM0003004	59.8327	1.02547	0.308582	3.32318	0.000889976	0.00355894	6.42026	9.88205	4.73735	12.585	20.1262	12.1416	--	--	--	--	--	--	--	--	Uncharacterized protein {ECO:0000313|EMBL:CDJ44143.1} OS=Eimeria tenella (Coccidian parasite) PE=4 SV=1	hypothetical protein, conserved [Eimeria tenella]	--
EVM0001422	71.8274	1.023	0.248633	4.11452	3.87992e-05	0.000218979	1.2938	0.868685	1.06569	1.90208	2.21814	2.76015	--	--	--	--	--	--	--	Protein PF14_0175 GN=PF14_0175 OS=Plasmodium falciparum (isolate 3D7) PE=3 SV=1	Uncharacterized protein {ECO:0000313|EMBL:CDJ37595.1} OS=Eimeria tenella (Coccidian parasite) PE=4 SV=1	hypothetical protein, conserved [Eimeria tenella]	Drosophila grimshawi GH12814 (Dgri\GH12814), mRNA
EVM0000212	318.815	1.01844	0.146742	6.94032	3.91208e-12	7.77552e-11	1.32946	1.66933	1.1535	2.88945	2.6004	3.29309	--	--	--	--	--	--	--	--	HECT type ubiquitin ligase, putative {ECO:0000313|EMBL:CDJ42652.1} OS=Eimeria tenella (Coccidian parasite) PE=4 SV=1	HECT type ubiquitin ligase, putative [Eimeria tenella]	Eimeria tenella chromosome 1, ordered contigs
EVM0003002	436.687	-1.00111	0.117001	-8.5564	1.16443e-17	4.65391e-16	22.2771	26.2423	23.4161	13.5348	11.094	12.8018	--	--	--	--	--	--	--	--	Uncharacterized protein {ECO:0000313|EMBL:CDJ40967.1} OS=Eimeria tenella (Coccidian parasite) PE=4 SV=1	hypothetical protein ETH_00005635 [Eimeria tenella]	Haliotis discus hannai clone CHh475 microsatellite sequence
EVM0007130	266.602	-1.00121	0.145072	-6.90144	5.14788e-12	1.00152e-10	23.9076	27.4907	28.4836	14.8525	13.3497	13.4643	--	--	--	--	--	--	--	--	Uncharacterized protein {ECO:0000313|EMBL:CDJ37527.1} OS=Eimeria tenella (Coccidian parasite) PE=4 SV=1	hypothetical protein, conserved [Eimeria tenella]	Toxoplasma gondii ME49 hypothetical protein, mRNA
EVM0006509	798.686	-1.00577	0.249361	-4.03338	5.49797e-05	0.000298612	72.8949	72.0497	53.4523	39.2801	24.9756	38.8118	--	--	--	--	--	--	Sporozoite TA4 surface antigen	Sporulated oocyst TA4 antigen 8 kDa subunit (Precursor) OS=Eimeria tenella (Coccidian parasite) PE=1 SV=2	SAG family member {ECO:0000313|EMBL:CDJ40612.1} OS=Eimeria tenella (Coccidian parasite) PE=4 SV=1	SAG family member [Eimeria tenella]	Eimeria tenella mRNA for surface antigen 10 (sag10 gene)
EVM0006680	55.5954	-1.00627	0.275754	-3.64916	0.000263094	0.00120849	3.88331	4.83442	4.31894	2.59021	1.52992	2.57175	--	--	--	--	--	--	--	--	Uncharacterized protein {ECO:0000313|EMBL:CDJ40553.1} OS=Eimeria tenella (Coccidian parasite) PE=4 SV=1	hypothetical protein, conserved [Eimeria tenella]	--
EVM0005575	138.733	-1.00681	0.207254	-4.85784	1.18671e-06	9.53778e-06	21.683	17.9761	16.6196	9.32994	12.8585	7.46222	--	--	--	--	--	--	--	--	--	--	Eimeria tenella clone Etm024C06 hypothetical protein mRNA, complete cds
EVM0006273	63.4296	-1.01148	0.303204	-3.33596	0.000850051	0.00343099	3.38467	2.05061	3.29929	1.32174	1.50015	1.72403	--	--	--	--	--	--	--	--	Uncharacterized protein {ECO:0000313|EMBL:CDJ68936.1} OS=Eimeria necatrix PE=4 SV=1	hypothetical protein, conserved [Eimeria necatrix]	Drosophila virilis GJ10764 (Dvir\GJ10764), mRNA
EVM0002453	88.1877	-1.01511	0.250787	-4.04772	5.17192e-05	0.000282153	4.22871	4.40917	5.69775	2.24294	2.4864	2.71107	[R]	General function prediction only	Molecular Function: hydrolase activity (GO:0016787);;	--	[A]	RNA processing and modification	Sec63 Brl domain	Activating signal cointegrator 1 complex subunit 3 GN=ascc3 OS=Dictyostelium discoideum (Slime mold) PE=3 SV=1	Activating signal cointegrator 1 complex subunit 3, putative {ECO:0000313|EMBL:CDJ38412.1} OS=Eimeria tenella (Coccidian parasite) PE=4 SV=1	activating signal cointegrator 1 complex subunit 3, putative [Eimeria tenella]	Toxoplasma gondii ME49 activating signal cointegrator 1 complex subunit 3, putative, mRNA
EVM0002262	1240.42	-1.01839	0.0969635	-10.5029	8.37951e-26	6.84699e-24	281.4	314.284	307.478	179.528	148.508	136.822	--	--	--	--	[V]	Defense mechanisms	Macrophage migration inhibitory factor (MIF)	Macrophage migration inhibitory factor homolog OS=Brugia malayi (Filarial nematode worm) PE=3 SV=4	Macrophage migration inhibitory factor {ECO:0000313|EMBL:ABC73371.1} OS=Eimeria tenella (Coccidian parasite) PE=2 SV=1	macrophage migration inhibitory factor [Eimeria tenella]	Eimeria tenella macrophage migration inhibitory factor (MIF) mRNA, complete cds
EVM0002321	414.549	-1.0196	0.135458	-7.52708	5.18889e-14	1.29793e-12	10.8504	11.229	10.407	4.90412	4.40793	7.35668	--	--	--	--	--	--	--	--	Uncharacterized protein {ECO:0000313|EMBL:CDJ37057.1} OS=Eimeria tenella (Coccidian parasite) PE=4 SV=1	hypothetical protein, conserved [Eimeria tenella]	Drosophila grimshawi GH12867 (Dgri\GH12867), mRNA
EVM0007253	46.6942	-1.02588	0.330534	-3.10372	0.00191104	0.00687227	7.015	6.77064	6.12363	3.86741	4.343	2.13325	--	--	--	--	--	--	--	--	--	--	Eimeria tenella chromosome 1, ordered contigs
EVM0004152	1398	-1.02678	0.0805286	-12.7505	3.09793e-37	5.99531e-35	307.134	317.62	314.47	147.916	169.285	166.329	--	--	--	--	[S]	Function unknown	Uncharacterised protein family (UPF0041)	Mitochondrial pyruvate carrier 1 GN=Mpc1 OS=Drosophila melanogaster (Fruit fly) PE=3 SV=1	Brain protein 44 family protein {ECO:0000313|EMBL:KFG37065.1} OS=Toxoplasma gondii p89 PE=4 SV=1	brain protein 44 family protein [Toxoplasma gondii FOU]	Neospora caninum Liverpool cDNA, FLJ92180, highly similar to Homo sapiens brain protein 44 (BRP44), mRNA, related (NCLIV_050160) mRNA, complete cds
EVM0005761	189.299	-1.02877	0.187075	-5.49925	3.81402e-08	4.14303e-07	5.74248	7.20609	7.03401	3.52139	2.44732	4.1836	--	--	--	--	--	--	--	--	Uncharacterized protein {ECO:0000313|EMBL:CDJ40230.1} OS=Eimeria tenella (Coccidian parasite) PE=4 SV=1	hypothetical protein, conserved [Eimeria tenella]	Haliotis discus hannai clone CHh522 microsatellite sequence
EVM0004886	276.635	-1.02919	0.168612	-6.10388	1.03525e-09	1.45013e-08	6.86307	9.72424	8.1133	3.62703	4.08988	4.94343	--	--	Biological Process: vacuolar transport (GO:0007034);; Biological Process: protein transport (GO:0015031);; Cellular Component: retromer complex (GO:0030904);;	K18466|0|tgo:TGME49_063500|vacuolar protein sorting 26, putative; K18466 vacuolar protein sorting-associated protein 26 (A)	[U]	Intracellular trafficking, secretion, and vesicular transport	Vacuolar protein sorting-associated protein 26	Vacuolar protein sorting-associated protein 26 GN=PFL2415w OS=Plasmodium falciparum (isolate 3D7) PE=3 SV=1	Vacuolar protein sorting 26, putative {ECO:0000313|EMBL:CDJ58802.1} OS=Eimeria maxima (Coccidian parasite) PE=4 SV=1	vacuolar protein sorting 26, putative [Eimeria maxima]	Eimeria tenella clone Etm041H07 hypothetical protein mRNA, complete cds
EVM0006261	46.6875	-1.02951	0.340269	-3.02557	0.00248167	0.0086086	1.75133	2.36225	1.83455	0.858238	0.802627	1.36948	[Z]	Cytoskeleton	--	--	[Z]	Cytoskeleton	Myosin head (motor domain)	High molecular weight form of myosin-1 OS=Acanthamoeba castellanii (Amoeba) PE=3 SV=1	Myosin F (TgMyoF) protein, putative {ECO:0000313|EMBL:CDJ40053.1} OS=Eimeria tenella (Coccidian parasite) PE=4 SV=1	myosin F (TgMyoF) protein, putative [Eimeria tenella]	Salpingoeca sp. ATCC 50818 hypothetical protein (PTSG_05395) mRNA, complete cds
EVM0007482	116.805	-1.03146	0.213357	-4.83442	1.33533e-06	1.06508e-05	15.212	16.1531	15.5499	9.39931	7.59376	6.91879	--	--	--	--	[B]	Chromatin structure and dynamics	Chromo (CHRromatin Organisation MOdifier) domain	Chromo domain-containing protein cec-3 GN=cec-3 OS=Caenorhabditis elegans PE=3 SV=1	Uncharacterized protein {ECO:0000313|EMBL:CDJ65886.1} OS=Eimeria necatrix PE=4 SV=1	hypothetical protein, conserved [Eimeria necatrix]	--
EVM0003161	236.537	-1.03718	0.157256	-6.5955	4.23828e-11	7.16513e-10	25.7602	25.7791	25.509	10.3395	15.1335	14.0856	[R]	General function prediction only	--	K10703|8.46822e-68|tgo:TGME49_111290|tyrosine phosphatase-like domain-containing protein; K10703 very-long-chain (3R)-3-hydroxyacyl-CoA dehydratase [EC:4.2.1.134] (A)	[R]	General function prediction only	Protein tyrosine phosphatase-like protein, PTPLA	Very-long-chain (3R)-3-hydroxyacyl-CoA dehydratase hpo-8 GN=hpo-8 OS=Caenorhabditis elegans PE=3 SV=2	Protein tyrosine phosphatase-like domian-containing protein, putative {ECO:0000313|EMBL:CDJ39651.1} OS=Eimeria tenella (Coccidian parasite) PE=4 SV=1	protein tyrosine phosphatase-like domian-containing protein, putative [Eimeria tenella]	Toxoplasma gondii ME49 tyrosine phosphatase-like domain-containing protein, mRNA
EVM0008309	52.7396	-1.03745	0.32087	-3.23324	0.00122395	0.00470269	1.8599	3.36208	3.10837	1.12178	1.99695	1.2066	--	--	--	--	--	--	--	--	Helicase conserved C-terminal domain-containing protein, putative {ECO:0000313|EMBL:CDJ64741.1} OS=Eimeria necatrix PE=4 SV=1	helicase conserved C-terminal domain-containing protein, putative [Eimeria necatrix]	Gongylonema pulchrum genome assembly G_pulchrum_Hokkaido ,scaffold GPUH_scaffold0025951
EVM0002485	39.4191	-1.04077	0.332739	-3.1279	0.0017606	0.00645115	5.12071	5.68168	3.55582	2.55193	1.87576	2.78712	--	--	--	--	--	--	--	--	Uncharacterized protein {ECO:0000313|EMBL:CDJ41295.1} OS=Eimeria tenella (Coccidian parasite) PE=4 SV=1	hypothetical protein, conserved [Eimeria tenella]	Eimeria tenella UDP-N-acetylglucosamine pyrophosphorylase mRNA, partial cds
EVM0005759	446.435	-1.04567	0.115929	-9.01988	1.88299e-19	8.76423e-18	14.3557	16.7608	14.3371	7.63069	7.23258	8.11143	--	--	--	--	--	--	Protein of unknown function (DUF3273)	--	Uncharacterized protein {ECO:0000313|EMBL:CDJ45528.1} OS=Eimeria tenella (Coccidian parasite) PE=4 SV=1	hypothetical protein, conserved [Eimeria tenella]	Hammondia hammondi multi-pass transmembrane protein partial mRNA
EVM0002271	57.8227	-1.04712	0.342091	-3.06093	0.00220652	0.007764	1.98285	2.90472	1.56655	0.82447	0.811628	1.57872	--	--	--	--	--	--	Sporozoite TA4 surface antigen	Sporulated oocyst TA4 antigen 8 kDa subunit (Precursor) OS=Eimeria tenella (Coccidian parasite) PE=1 SV=2	SAG family member {ECO:0000313|EMBL:CDJ41982.1} OS=Eimeria tenella (Coccidian parasite) PE=4 SV=1	SAG family member [Eimeria tenella]	Eimeria tenella clone Etm031F01 hypothetical protein mRNA, complete cds
EVM0006123	471.106	-1.0476	0.139016	-7.53584	4.85205e-14	1.23041e-12	11.6531	17.4739	14.4674	6.92522	6.84591	8.24384	--	--	--	--	--	--	--	--	Uncharacterized protein {ECO:0000313|EMBL:CDJ42574.1} OS=Eimeria tenella (Coccidian parasite) PE=4 SV=1	hypothetical protein, conserved [Eimeria tenella]	Eimeria maxima imp-1 gene for immune mapped protein 1, exons 1-4, strain Weybridge, clone EmaxBAC2k08
EVM0006651	474.94	-1.04762	0.134259	-7.80295	6.04742e-15	1.79549e-13	31.5315	31.0112	29.0419	13.8343	12.5315	19.8281	--	--	--	--	--	--	--	--	--	--	Drosophila melanogaster chromosome 3R
EVM0004625	256.336	-1.0512	0.194688	-5.39939	6.6866e-08	6.86778e-07	4.67044	6.51974	7.26631	3.82423	2.35577	3.04909	[P]	Inorganic ion transport and metabolism	Molecular Function: hydrolase activity (GO:0016787);;	--	[P]	Inorganic ion transport and metabolism	--	--	Copper-transporting ATPase, putative {ECO:0000313|EMBL:CDJ42575.1} OS=Eimeria tenella (Coccidian parasite) PE=3 SV=1	copper-transporting ATPase, putative [Eimeria tenella]	Eimeria tenella chromosome 1, ordered contigs
EVM0006264	241.156	-1.05291	0.152584	-6.90053	5.181e-12	1.00531e-10	16.5092	15.5812	14.5021	6.25857	9.74754	7.72956	--	--	--	--	--	--	--	--	Uncharacterized protein {ECO:0000313|EMBL:CDJ38465.1} OS=Eimeria tenella (Coccidian parasite) PE=4 SV=1	hypothetical protein, conserved [Eimeria tenella]	Hammondia hammondi hypothetical protein partial mRNA
EVM0004263	2228.97	-1.05323	0.0865888	-12.1636	4.85623e-34	6.86783e-32	70.743	82.1131	69.9929	38.1588	39.7594	34.3492	--	--	--	--	--	--	--	--	Uncharacterized protein {ECO:0000313|EMBL:CDJ41470.1} OS=Eimeria tenella (Coccidian parasite) PE=4 SV=1	hypothetical protein, conserved [Eimeria tenella]	Neospora caninum Liverpool conserved hypothetical protein (NCLIV_056670) mRNA, complete cds
EVM0005473	89.9604	-1.05601	0.254822	-4.14409	3.41166e-05	0.00019601	5.63553	7.28939	4.01272	3.24905	2.08965	3.06459	[R]	General function prediction only	--	--	[R]	General function prediction only	DEAD/DEAH box helicase	Putative U5 small nuclear ribonucleoprotein 200 kDa helicase GN=Y46G5A.4 OS=Caenorhabditis elegans PE=3 SV=1	DNA polymerase, putative {ECO:0000313|EMBL:CDJ40042.1} OS=Eimeria tenella (Coccidian parasite) PE=4 SV=1	DNA polymerase, putative [Eimeria tenella]	--
EVM0000287	1409.88	-1.0641	0.0863069	-12.3293	6.30254e-35	9.65602e-33	200.148	202.475	190.943	99.7621	105.887	91.6549	--	--	--	--	--	--	--	--	Putative uncharacterized protein {ECO:0000313|EMBL:AET50869.1} OS=Eimeria tenella (Coccidian parasite) PE=2 SV=1	hypothetical protein [Eimeria tenella]	Eimeria tenella clone Etm102D06 hypothetical protein mRNA, complete cds
EVM0006981	50.1489	-1.07003	0.351181	-3.04694	0.00231186	0.00809978	6.57433	7.87575	5.15499	2.98436	4.2065	2.62637	--	--	--	--	--	--	--	--	Uncharacterized protein {ECO:0000313|EMBL:CDJ66168.1} OS=Eimeria necatrix PE=4 SV=1	hypothetical protein ENH_00042410 [Eimeria necatrix]	Drosophila mojavensis GI14833 (Dmoj\GI14833), mRNA
EVM0001606	46.4638	-1.07074	0.347145	-3.08442	0.00203948	0.00727016	1.32916	0.80318	1.30834	0.502472	0.89769	0.351071	[C]	Energy production and conversion	Molecular Function: aconitate hydratase activity (GO:0003994);;	K01681|0|tgo:TGME49_026730|aconitate hydratase, putative (EC:4.2.1.3); K01681 aconitate hydratase [EC:4.2.1.3] (A)	[AJ]	--	Aconitase family (aconitate hydratase)	Probable cytoplasmic aconitate hydratase GN=aco1 OS=Dictyostelium discoideum (Slime mold) PE=3 SV=1	Aconitate hydratase, putative {ECO:0000313|EMBL:CDJ43449.1} OS=Eimeria tenella (Coccidian parasite) PE=4 SV=1	aconitate hydratase, putative [Eimeria tenella]	Leishmania donovani aconitase, putative (LDBPK_180510) mRNA, complete cds
EVM0003084	566.636	-1.073	0.11301	-9.49469	2.20866e-21	1.25911e-19	9.47017	9.03023	7.4345	3.88743	4.57231	4.46319	--	--	--	--	--	--	Kelch motif	Protein PF14_0175 GN=PF14_0175 OS=Plasmodium falciparum (isolate 3D7) PE=3 SV=1	Uncharacterized protein {ECO:0000313|EMBL:CDJ38759.1} OS=Eimeria tenella (Coccidian parasite) PE=4 SV=1	hypothetical protein, conserved [Eimeria tenella]	Drosophila pseudoobscura pseudoobscura GA27061 (Dpse\GA27061), mRNA
EVM0002663	626.427	-1.07881	0.108295	-9.96182	2.23933e-23	1.45735e-21	20.7419	19.9769	18.3949	9.98167	9.97539	9.31382	[R]	General function prediction only	--	K09560|2.77325e-108|tgo:TGME49_032660|58 kDa phosphoprotein, putative; K09560 suppressor of tumorigenicity protein 13 (A)	[OT]	--	TPR repeat	58 kDa phosphoprotein OS=Plasmodium berghei PE=1 SV=1	58 kDa phosphoprotein, putative {ECO:0000313|EMBL:CDJ42517.1} OS=Eimeria tenella (Coccidian parasite) PE=4 SV=1	58 kDa phosphoprotein, putative [Eimeria tenella]	Hammondia hammondi Hsp70 interacting protein HIP partial mRNA
EVM0007672	88.7961	-1.0839	0.243988	-4.44241	8.89569e-06	5.88299e-05	8.05604	8.83646	6.60997	4.69052	3.12448	3.64806	--	--	--	--	--	--	STOP protein	--	Uncharacterized protein {ECO:0000313|EMBL:CDJ45342.1} OS=Eimeria tenella (Coccidian parasite) PE=4 SV=1	hypothetical protein, conserved [Eimeria tenella]	Neospora caninum Liverpool hypothetical protein (NCLIV_024420) mRNA, complete cds
EVM0000878	106.373	-1.0857	0.228442	-4.75264	2.00781e-06	1.54128e-05	1.58519	1.33041	1.89969	0.69051	0.872352	0.828419	--	--	--	--	--	--	--	--	Uncharacterized protein {ECO:0000313|EMBL:CDJ41385.1} OS=Eimeria tenella (Coccidian parasite) PE=4 SV=1	hypothetical protein, conserved [Eimeria tenella]	--
EVM0000548	52.7553	-1.086	0.333048	-3.26078	0.00111107	0.00431404	2.40097	3.78483	2.52721	1.48353	1.19855	1.57454	--	--	--	--	--	--	--	--	Uncharacterized protein {ECO:0000313|EMBL:CDJ41953.1} OS=Eimeria tenella (Coccidian parasite) PE=4 SV=1	hypothetical protein, conserved [Eimeria tenella]	Salpingoeca sp. ATCC 50818 hypothetical protein (PTSG_12891) mRNA, complete cds
EVM0007560	31497.5	-1.09008	0.0607885	-17.9324	6.59007e-72	8.07723e-69	3109.12	3263.38	3202.16	1555.62	1530.18	1618.26	--	--	Molecular Function: actin binding (GO:0003779);; Cellular Component: actin cytoskeleton (GO:0015629);; Biological Process: actin filament depolymerization (GO:0030042);;	K05765|9.72753e-51|tgo:TGME49_020400|actin depolymerizing factor; K05765 cofilin (A)	[Z]	Cytoskeleton	Cofilin/tropomyosin-type actin-binding protein	Actophorin OS=Acanthamoeba castellanii (Amoeba) PE=1 SV=2	Actin depolymerizing factor, putative {ECO:0000313|EMBL:CDJ67467.1} OS=Eimeria necatrix PE=4 SV=1	actin depolymerizing factor [Eimeria tenella]	Eimeria tenella actin depolymerizing factor mRNA, complete cds
EVM0003072	424.418	-1.09656	0.140404	-7.81004	5.71716e-15	1.70911e-13	24.1953	22.1258	21.2198	8.15342	10.4457	14.4803	--	--	--	--	--	--	Sporozoite TA4 surface antigen	Sporulated oocyst TA4 antigen 8 kDa subunit (Precursor) OS=Eimeria tenella (Coccidian parasite) PE=1 SV=2	SAG family member {ECO:0000313|EMBL:CDJ41978.1} OS=Eimeria tenella (Coccidian parasite) PE=4 SV=1	SAG family member [Eimeria tenella]	Eimeria tenella mRNA for surface antigen 3 (sag3 gene)
EVM0000398	1743.1	-1.09904	0.0887863	-12.3785	3.41598e-35	5.34492e-33	61.057	58.5462	58.4583	27.2744	31.4089	28.6128	--	--	--	--	--	--	Sporozoite TA4 surface antigen	Sporulated oocyst TA4 antigen 8 kDa subunit (Precursor) OS=Eimeria tenella (Coccidian parasite) PE=1 SV=2	SAG family member {ECO:0000313|EMBL:CDJ41971.1} OS=Eimeria tenella (Coccidian parasite) PE=4 SV=1	SAG family member [Eimeria tenella]	Eimeria tenella surface antigen 2 mRNA, complete cds
EVM0008279	519.504	-1.09939	0.106589	-10.3143	6.07183e-25	4.60332e-23	29.1328	29.6811	26.9165	13.9176	14.6903	13.3248	--	--	--	--	--	--	Sporozoite TA4 surface antigen	Sporulated oocyst TA4 antigen 8 kDa subunit (Precursor) OS=Eimeria tenella (Coccidian parasite) PE=1 SV=2	SAG family member {ECO:0000313|EMBL:CDJ41997.1} OS=Eimeria tenella (Coccidian parasite) PE=4 SV=1	SAG family member [Eimeria tenella]	Eimeria tenella clone Etm031F01 hypothetical protein mRNA, complete cds
EVM0000541	275.224	-1.104	0.161825	-6.82223	8.9639e-12	1.67737e-10	8.95885	10.2921	9.73744	4.80761	5.75158	3.64631	[M]	Cell wall/membrane/envelope biogenesis	Biological Process: fucose metabolic process (GO:0006004);; Molecular Function: lyase activity (GO:0016829);; Biological Process: cellular metabolic process (GO:0044237);;	K01711|5.15826e-159|tgo:TGME49_038940|GDP-mannose 4,6 dehydratase, putative (EC:4.2.1.47); K01711 GDPmannose 4,6-dehydratase [EC:4.2.1.47] (A)	[G]	Carbohydrate transport and metabolism	NAD dependent epimerase/dehydratase family	GDP-mannose 4,6 dehydratase GN=Gmd OS=Drosophila melanogaster (Fruit fly) PE=1 SV=2	GDP-mannose 4,6 dehydratase, putative {ECO:0000313|EMBL:CDJ37600.1} OS=Eimeria tenella (Coccidian parasite) PE=3 SV=1	GDP-mannose 4,6 dehydratase, putative [Eimeria tenella]	Hammondia hammondi GDP mannose 4,6-dehydratase, putative partial mRNA
EVM0006117	140.555	-1.10432	0.244955	-4.50826	6.53618e-06	4.45066e-05	5.36668	5.83005	4.49175	1.92074	2.28063	3.43269	--	--	--	--	--	--	--	--	Uncharacterized protein {ECO:0000313|EMBL:CDJ69885.1} (Fragment) OS=Eimeria necatrix PE=4 SV=1	hypothetical protein, conserved, partial [Eimeria necatrix]	Drosophila erecta GG19009 (Dere\GG19009), mRNA
EVM0000969	53.9798	-1.10495	0.348647	-3.16924	0.00152837	0.00572283	1.3559	1.63868	2.12103	0.425254	0.695973	1.37223	[L]	Replication, recombination and repair	--	--	[L]	Replication, recombination and repair	Rad51	DNA repair protein RAD51 homolog 3 GN=rad51c OS=Dictyostelium discoideum (Slime mold) PE=3 SV=1	DNA repair protein recA , putative {ECO:0000313|EMBL:CDJ44928.1} OS=Eimeria tenella (Coccidian parasite) PE=4 SV=1	DNA repair protein recA , putative [Eimeria tenella]	Haliotis discus hannai clone CHh406 microsatellite sequence
EVM0002943	921.029	-1.10586	0.111632	-9.90632	3.90762e-23	2.47729e-21	21.0283	22.1334	20.1891	8.94269	9.67427	12.1568	--	--	--	--	[S]	Function unknown	Domain of unknown function (DUF3437)	--	Uncharacterized protein {ECO:0000313|EMBL:CDJ67444.1} OS=Eimeria necatrix PE=4 SV=1	hypothetical protein, conserved [Eimeria necatrix]	Salpingoeca sp. ATCC 50818 hypothetical protein (PTSG_12077) mRNA, complete cds
EVM0006804	37.2096	-1.11335	0.369335	-3.01449	0.00257415	0.00886248	2.40985	1.54448	2.52947	1.07359	0.946952	1.10857	--	--	--	--	--	--	--	--	Uncharacterized protein {ECO:0000313|EMBL:CDJ43537.1} (Fragment) OS=Eimeria tenella (Coccidian parasite) PE=4 SV=1	hypothetical protein ETH_00016475, partial [Eimeria tenella]	--
EVM0003166	195.265	-1.11596	0.182037	-6.13042	8.76466e-10	1.24615e-08	9.75927	10.8477	10.694	5.48241	5.30515	4.34309	--	--	--	--	--	--	--	--	Axonemal inner arm I1 intermediate chain dynein IC138, putative {ECO:0000313|EMBL:CDJ68037.1} OS=Eimeria necatrix PE=4 SV=1	axonemal inner arm I1 intermediate chain dynein IC138, putative [Eimeria necatrix]	--
EVM0004930	5700.23	-1.11939	0.0721044	-15.5245	2.36825e-54	1.24401e-51	246.411	246.41	238.559	123.445	106.174	122.027	[G]	Carbohydrate transport and metabolism	Molecular Function: magnesium ion binding (GO:0000287);; Molecular Function: pyruvate kinase activity (GO:0004743);; Molecular Function: ATP binding (GO:0005524);; Biological Process: glycolytic process (GO:0006096);; Biological Process: phosphorylation (GO:0016310);; Molecular Function: potassium ion binding (GO:0030955);;	K00873|0|tgo:TGME49_056760|pyruvate kinase, putative (EC:2.7.1.40); K00873 pyruvate kinase [EC:2.7.1.40] (A)	[G]	Carbohydrate transport and metabolism	Pyruvate kinase, barrel domain	Pyruvate kinase GN=PYK OS=Eimeria tenella (Coccidian parasite) PE=2 SV=1	Pyruvate kinase {ECO:0000256|RuleBase:RU000504} OS=Eimeria tenella (Coccidian parasite) PE=3 SV=1	RecName: Full=Pyruvate kinase; Short=PK [Eimeria tenella]	Eimeria tenella clone Etm006D11 hypothetical protein mRNA, complete cds
EVM0005451	2001.37	-1.12022	0.0766575	-14.6133	2.31021e-48	9.99371e-46	90.4922	89.0287	89.3485	45.3543	45.7777	38.228	[QR]	--	Biological Process: metabolic process (GO:0008152);; Molecular Function: transferase activity (GO:0016740);;	K05929|6.94322e-52|pvx:PVX_083045|phosphoethanolamine N-methyltransferase; K05929 phosphoethanolamine N-methyltransferase [EC:2.1.1.103] (A)	[IR]	--	Methyltransferase domain	--	Uncharacterized protein {ECO:0000313|EMBL:CDJ43178.1} OS=Eimeria tenella (Coccidian parasite) PE=4 SV=1	hypothetical protein, conserved [Eimeria tenella]	Plasmodium vivax SaI-1 phosphoethanolamine N-methyltransferase partial mRNA
EVM0003108	36.129	-1.12532	0.367893	-3.05881	0.00222216	0.00781154	1.08034	1.08805	1.5476	0.529423	0.701583	0.566084	--	--	--	--	--	--	--	--	Uncharacterized protein {ECO:0000313|EMBL:CDJ40400.1} OS=Eimeria tenella (Coccidian parasite) PE=4 SV=1	hypothetical protein, conserved [Eimeria tenella]	Spirometra erinaceieuropaei genome assembly S_erinaceieuropaei ,scaffold SPER_contig0089586
EVM0005133	60.7161	-1.12778	0.308166	-3.65965	0.000252562	0.00116629	6.73684	7.12411	7.2922	3.21885	3.75371	3.19591	--	--	--	--	--	--	--	--	Uncharacterized protein {ECO:0000313|EMBL:CDJ40377.1} (Fragment) OS=Eimeria tenella (Coccidian parasite) PE=4 SV=1	hypothetical protein, conserved, partial [Eimeria tenella]	Haliotis discus hannai clone CHh475 microsatellite sequence
EVM0002390	102.68	-1.13437	0.243666	-4.65544	3.23292e-06	2.36515e-05	4.03223	5.99242	4.48712	2.07238	2.85615	2.05761	--	--	--	--	--	--	--	--	Uncharacterized protein {ECO:0000313|EMBL:CDJ67727.1} OS=Eimeria necatrix PE=4 SV=1	hypothetical protein, conserved [Eimeria necatrix]	Drosophila mojavensis GI21037 (Dmoj\GI21037), mRNA
EVM0004442	413.74	-1.14698	0.152045	-7.54368	4.569e-14	1.16668e-12	12.8861	13.703	16.4897	6.84399	7.48753	6.16473	--	--	--	--	--	--	Sporozoite TA4 surface antigen	Sporulated oocyst TA4 antigen 8 kDa subunit (Precursor) OS=Eimeria tenella (Coccidian parasite) PE=1 SV=2	SAG family member {ECO:0000313|EMBL:CDJ41972.1} OS=Eimeria tenella (Coccidian parasite) PE=4 SV=1	SAG family member [Eimeria tenella]	Eimeria tenella mRNA for surface antigen 2 (sag2 gene)
EVM0005017	64.9698	-1.14737	0.275131	-4.17028	3.04224e-05	0.00017658	2.39892	2.83019	3.5101	1.4107	1.38873	1.33395	--	--	--	--	--	--	--	--	Uncharacterized protein {ECO:0000313|EMBL:CDJ41320.1} OS=Eimeria tenella (Coccidian parasite) PE=4 SV=1	hypothetical protein, conserved [Eimeria tenella]	--
EVM0006003	72.4728	-1.14995	0.272561	-4.21907	2.45315e-05	0.000145137	7.84992	10.7294	6.68277	4.28649	4.24136	3.38292	--	--	--	--	--	--	Protein of unknown function (DUF3273)	--	Uncharacterized protein {ECO:0000313|EMBL:CDJ38360.1} OS=Eimeria tenella (Coccidian parasite) PE=4 SV=1	hypothetical protein ETH_00026615 [Eimeria tenella]	Toxoplasma gondii cDNA, clone: XTG05421.2, full cDNA, XTG Sugano cDNA library
EVM0007490	2243.93	-1.15253	0.0741941	-15.534	2.04182e-54	1.15504e-51	109.148	114.167	106.949	56.9934	47.6119	50.2436	--	--	--	--	--	--	--	--	Uncharacterized protein {ECO:0000313|EMBL:CDJ39229.1} OS=Eimeria tenella (Coccidian parasite) PE=4 SV=1	hypothetical protein, conserved [Eimeria tenella]	Toxoplasma gondii ME49 hypothetical protein, conserved, mRNA
EVM0005771	4218.63	-1.1543	0.0909504	-12.6916	6.58471e-37	1.18107e-34	98.4806	108.413	89.3116	46.738	50.8283	41.6057	--	--	--	--	--	--	--	--	Surface antigen 13 {ECO:0000313|EMBL:CAE52304.1} (Precursor) OS=Eimeria tenella (Coccidian parasite) PE=2 SV=1	surface antigen 13 [Eimeria tenella]	Eimeria tenella mRNA for surface antigen 13 (sag13 gene)
EVM0000156	42.5026	-1.1553	0.344356	-3.35496	0.000793758	0.00322502	10.5712	8.82146	8.29638	2.96024	5.50771	4.70263	--	--	--	--	--	--	--	--	Uncharacterized protein {ECO:0000313|EMBL:CDJ44298.1} (Fragment) OS=Eimeria tenella (Coccidian parasite) PE=4 SV=1	hypothetical protein, conserved, partial [Eimeria tenella]	--
EVM0007890	5547.88	-1.15723	0.0627124	-18.4529	4.93812e-76	7.26299e-73	65.1233	71.5469	64.5971	30.9934	30.7499	32.5999	[F]	Nucleotide transport and metabolism	Molecular Function: hydrolase activity (GO:0016787);;	--	[F]	Nucleotide transport and metabolism	5'-nucleotidase, C-terminal domain	Apyrase {ECO:0000303|PubMed:21842387} (Precursor) OS=Aedes albopictus (Asian tiger mosquito) PE=1 SV=1	Nucleotidase, putative {ECO:0000313|EMBL:CDJ43159.1} OS=Eimeria tenella (Coccidian parasite) PE=4 SV=1	nucleotidase, putative [Eimeria tenella]	Hammondia hammondi 5'-nucleotidase, C-terminal domain-containing protein partial mRNA
EVM0007721	54.3653	-1.16443	0.269087	-4.32733	1.50929e-05	9.44208e-05	4.33238	5.02283	5.01904	2.22183	2.1775	2.30404	--	--	--	--	--	--	Fasciclin domain	--	Fasciclin domain-containing protein, putative {ECO:0000313|EMBL:CDJ38117.1} OS=Eimeria tenella (Coccidian parasite) PE=4 SV=1	fasciclin domain-containing protein, putative [Eimeria tenella]	Fonticula alba hypothetical protein mRNA
EVM0006171	36.4664	-1.16494	0.389731	-2.98908	0.00279815	0.00951345	4.60954	5.17297	6.74469	2.32345	1.42318	3.84481	[R]	General function prediction only	Molecular Function: sphingomyelin phosphodiesterase activity (GO:0004767);; Molecular Function: GTP binding (GO:0005525);; Biological Process: small GTPase mediated signal transduction (GO:0007264);; Biological Process: protein transport (GO:0015031);;	--	[U]	Intracellular trafficking, secretion, and vesicular transport	Ras family	Ras-related protein Rab-11A GN=rab11A OS=Dictyostelium discoideum (Slime mold) PE=1 SV=1	Rab 11b, putative {ECO:0000313|EMBL:CDJ45203.1} OS=Eimeria tenella (Coccidian parasite) PE=4 SV=1	Rab 11b, putative [Eimeria tenella]	Neospora caninum Liverpool putative Rab 11b (NCLIV_009790) mRNA, complete cds
EVM0002584	44.8633	-1.16722	0.353731	-3.29975	0.000967698	0.00382811	4.18424	6.39377	9.1356	3.39391	2.33873	3.36972	--	--	Molecular Function: transferase activity, transferring phosphorus-containing groups (GO:0016772);;	K12572|1.40993e-13|cho:Chro.20350|PABP1-dependent poly A-specific ribonuclease subunit PAN3; PABP-dependent poly(A) nuclease 3; K12572 PAB-dependent poly(A)-specific ribonuclease subunit 3 (A)	[A]	RNA processing and modification	--	PAB-dependent poly(A)-specific ribonuclease subunit PAN3 {ECO:0000255|HAMAP-Rule:MF_03181} GN=pan3 OS=Dictyostelium discoideum (Slime mold) PE=3 SV=1	Poly(A) ribonuclease subunit, related {ECO:0000313|EMBL:CDJ38119.1} OS=Eimeria tenella (Coccidian parasite) PE=4 SV=1	Poly(A) ribonuclease subunit, related [Eimeria tenella]	--
EVM0004491	2590.76	-1.16971	0.0832804	-14.0455	8.21334e-45	2.87623e-42	72.7208	76.8988	76.6279	32.629	34.2905	38.3214	--	--	--	--	--	--	Sporozoite TA4 surface antigen	Sporulated oocyst TA4 antigen 8 kDa subunit (Precursor) OS=Eimeria tenella (Coccidian parasite) PE=1 SV=2	Surface antigen 4 {ECO:0000313|EMBL:CAE52296.1} (Precursor) OS=Eimeria tenella (Coccidian parasite) PE=2 SV=1	surface antigen 4 [Eimeria tenella]	Eimeria tenella clone Etm125D09 hypothetical protein mRNA, complete cds
EVM0005649	617.79	-1.17217	0.110064	-10.6499	1.74587e-26	1.49292e-24	14.0029	12.8259	14.7175	5.55045	6.77427	7.04627	--	--	--	--	--	--	--	--	Uncharacterized protein {ECO:0000313|EMBL:CDJ37352.1} OS=Eimeria tenella (Coccidian parasite) PE=4 SV=1	hypothetical protein, conserved [Eimeria tenella]	Eimeria tenella clone Etm041E11 hypothetical protein mRNA, complete cds
EVM0002400	112.83	-1.17503	0.226754	-5.18197	2.19555e-07	2.04381e-06	2.8191	3.34172	3.22892	1.29592	1.65123	1.43235	--	--	--	--	[R]	General function prediction only	Cleft lip and palate transmembrane protein 1 (CLPTM1)	CLPTM1-like membrane protein cnrB GN=cnrB OS=Dictyostelium discoideum (Slime mold) PE=3 SV=1	Cleft lip and palate transmembrane protein 1, putative {ECO:0000313|EMBL:CDJ38328.1} OS=Eimeria tenella (Coccidian parasite) PE=4 SV=1	Cleft lip and palate transmembrane protein 1, putative [Eimeria tenella]	Neospora caninum Liverpool putative Cleft lip and palate transmembrane protein 1 (NCLIV_009390) mRNA, complete cds
EVM0000019	104.055	-1.184	0.270795	-4.37231	1.22941e-05	7.85497e-05	4.39606	3.95862	4.09329	0.912403	1.81634	3.01967	--	--	--	--	--	--	Protein of unknown function (DUF3273)	--	Uncharacterized protein {ECO:0000313|EMBL:CDJ38360.1} OS=Eimeria tenella (Coccidian parasite) PE=4 SV=1	hypothetical protein ETH_00026615 [Eimeria tenella]	Neospora caninum Liverpool hypothetical protein (NCLIV_022430) mRNA, complete cds
EVM0006330	139.713	-1.18772	0.213163	-5.57188	2.5201e-08	2.81653e-07	4.5904	6.23117	5.76095	2.24952	2.5611	2.81614	--	--	--	--	--	--	--	--	Uncharacterized protein {ECO:0000313|EMBL:CDJ39376.1} OS=Eimeria tenella (Coccidian parasite) PE=4 SV=1	hypothetical protein, conserved [Eimeria tenella]	--
EVM0001734	69.0606	-1.18855	0.300709	-3.95249	7.73437e-05	0.00040733	10.4046	9.72354	8.55337	4.31787	6.45732	2.55401	--	--	--	--	--	--	--	--	Uncharacterized protein {ECO:0000313|EMBL:CDJ38527.1} (Fragment) OS=Eimeria tenella (Coccidian parasite) PE=4 SV=1	hypothetical protein, conserved, partial [Eimeria tenella]	Fonticula alba hypothetical protein partial mRNA
EVM0006304	58.8576	-1.19134	0.259812	-4.58537	4.53178e-06	3.21827e-05	7.50087	9.06522	8.03191	3.96986	4.35672	2.99267	--	--	--	--	--	--	--	--	Uncharacterized protein {ECO:0000313|EMBL:CDJ41067.1} OS=Eimeria tenella (Coccidian parasite) PE=4 SV=1	hypothetical protein, conserved [Eimeria tenella]	--
EVM0000609	661.569	-1.20169	0.110394	-10.8855	1.3514e-27	1.29068e-25	49.7807	55.8218	51.5452	24.1588	23.5301	23.7186	--	--	--	--	--	--	Protein of unknown function (DUF3273)	--	Multi-pass transmembrane protein, related {ECO:0000313|EMBL:CDJ40719.1} OS=Eimeria tenella (Coccidian parasite) PE=4 SV=1	Multi-pass transmembrane protein, related [Eimeria tenella]	Eimeria tenella clone Etm026D01 hypothetical protein mRNA, complete cds
EVM0001351	78.6579	-1.20321	0.244545	-4.92022	8.64479e-07	7.1351e-06	20.7992	24.4733	23.3935	10.8991	10.014	10.2202	--	--	--	--	--	--	--	--	Uncharacterized protein {ECO:0000313|EMBL:CDJ37767.1} OS=Eimeria tenella (Coccidian parasite) PE=4 SV=1	hypothetical protein ETH_00004490 [Eimeria tenella]	--
EVM0007673	87.9805	-1.213	0.256293	-4.73286	2.21383e-06	1.68885e-05	27.3891	29.451	33.1727	11.7064	8.34502	20.24	--	--	--	--	--	--	--	--	Uncharacterized protein {ECO:0000313|EMBL:CDJ40395.1} OS=Eimeria tenella (Coccidian parasite) PE=4 SV=1	hypothetical protein, conserved [Eimeria tenella]	Eimeria tenella clone Etm028D06 hypothetical protein mRNA, complete cds
EVM0004810	62.0507	-1.2304	0.345462	-3.56161	0.000368594	0.00161829	11.7458	18.5893	14.5825	5.75602	11.3327	3.53786	--	--	--	--	--	--	--	--	Uncharacterized protein {ECO:0000313|EMBL:CDJ43016.1} OS=Eimeria tenella (Coccidian parasite) PE=4 SV=1	hypothetical protein, conserved [Eimeria tenella]	--
EVM0008174	96.2943	-1.23335	0.239484	-5.15003	2.60448e-07	2.37635e-06	12.5646	10.2333	9.66457	3.64081	6.49355	4.57174	--	--	--	--	--	--	--	--	--	--	Spirometra erinaceieuropaei genome assembly S_erinaceieuropaei ,scaffold SPER_contig0051773
EVM0003577	54.1087	-1.23506	0.299883	-4.11846	3.81405e-05	0.00021609	12.4589	12.5478	9.66739	5.55045	3.31483	6.24568	--	--	--	--	--	--	--	--	FtsJ-like methyltransferase domain-containing protein, putative {ECO:0000313|EMBL:CDJ41242.1} OS=Eimeria tenella (Coccidian parasite) PE=4 SV=1	ftsJ-like methyltransferase domain-containing protein, putative [Eimeria tenella]	--
EVM0003421	71668.3	-1.23845	0.0631473	-19.6121	1.21844e-85	2.9868e-82	1337.08	1437.29	1327.87	597.916	593.353	627.222	[Z]	Cytoskeleton	Molecular Function: structural constituent of cytoskeleton (GO:0005200);; Molecular Function: ATP binding (GO:0005524);; Cellular Component: cytoplasm (GO:0005737);; Cellular Component: actin filament (GO:0005884);; Biological Process: cytoskeleton organization (GO:0007010);; Biological Process: actin polymerization-dependent cell motility involved in migration of symbiont in host (GO:0070359);;	K10355|0|tgo:TGME49_009030|actin; K10355 actin, other eukaryote (A)	[Z]	Cytoskeleton	Actin	Actin GN=ACT1 OS=Toxoplasma gondii PE=3 SV=1	Actin, putative {ECO:0000313|EMBL:CDJ63179.1} OS=Eimeria necatrix PE=3 SV=1	hypothetical protein [Eimeria tenella]	Eimeria tenella clone Etm008A10 hypothetical protein mRNA, complete cds
EVM0004924	503.001	-1.24209	0.117094	-10.6076	2.74617e-26	2.3213e-24	26.5961	29.5598	25.353	12.6572	12.6866	10.7215	--	--	--	--	--	--	Protein of unknown function (DUF3273)	--	Uncharacterized protein {ECO:0000313|EMBL:CDJ42109.1} OS=Eimeria tenella (Coccidian parasite) PE=4 SV=1	hypothetical protein ETH_00004135 [Eimeria tenella]	Toxoplasma gondii cDNA, clone: XTG05421.2, full cDNA, XTG Sugano cDNA library
EVM0006571	37.5011	-1.24792	0.354595	-3.51929	0.0004327	0.00186523	0.995314	1.02097	1.01258	0.560013	0.224073	0.520149	[OZ]	--	--	--	[O]	Posttranslational modification, protein turnover, chaperones	--	Tubulin-specific chaperone D GN=tbcd OS=Dictyostelium discoideum (Slime mold) PE=3 SV=2	Beta-tubulin cofactor d, putative {ECO:0000313|EMBL:CDJ37505.1} OS=Eimeria tenella (Coccidian parasite) PE=4 SV=1	beta-tubulin cofactor d, putative [Eimeria tenella]	Haliotis discus hannai clone CHh040 microsatellite sequence
EVM0005394	159.568	-1.25653	0.198927	-6.31655	2.67472e-10	4.06402e-09	2.79229	3.68873	3.39348	1.74155	1.32256	1.2351	--	--	--	--	--	--	--	--	Uncharacterized protein {ECO:0000313|EMBL:CDJ45199.1} OS=Eimeria tenella (Coccidian parasite) PE=4 SV=1	hypothetical protein, conserved [Eimeria tenella]	--
EVM0001298	2500.32	-1.26408	0.084274	-14.9996	7.3855e-51	3.62087e-48	74.0349	80.6832	67.7305	32.1374	32.0498	32.6283	--	--	--	--	--	--	--	--	Uncharacterized protein {ECO:0000313|EMBL:CDJ40983.1} OS=Eimeria tenella (Coccidian parasite) PE=4 SV=1	hypothetical protein, conserved [Eimeria tenella]	--
EVM0006295	423.922	-1.26563	0.11791	-10.7339	7.05428e-27	6.25026e-25	16.3682	18.6426	18.4726	7.01331	8.50813	7.88065	--	--	Molecular Function: hydrolase activity (GO:0016787);;	K05610|4.09055e-98|tgo:TGME49_047240|ubiquitin carboxyl-terminal hydrolase isozyme L5, putative (EC:3.4.19.12); K05610 ubiquitin carboxyl-terminal hydrolase L5 [EC:3.4.19.12] (A)	[O]	Posttranslational modification, protein turnover, chaperones	Ubiquitin carboxyl-terminal hydrolase, family 1	Ubiquitin carboxyl-terminal hydrolase isozyme L5 GN=uch2 OS=Dictyostelium discoideum (Slime mold) PE=3 SV=1	Ubiquitin carboxyl-terminal hydrolase {ECO:0000256|RuleBase:RU361215} OS=Eimeria acervulina (Coccidian parasite) PE=3 SV=1	ubiquitin carboxyl-terminal hydrolase isozyme L5, putative [Eimeria acervulina]	Neospora caninum Liverpool hypothetical protein (NCLIV_063760) mRNA, complete cds
EVM0006867	87.4648	-1.26788	0.252644	-5.01843	5.20948e-07	4.49127e-06	6.35232	6.51832	4.85462	2.46687	3.07603	2.21602	--	--	--	--	--	--	--	--	Uncharacterized protein {ECO:0000313|EMBL:CDJ43164.1} OS=Eimeria tenella (Coccidian parasite) PE=4 SV=1	hypothetical protein, conserved [Eimeria tenella]	--
EVM0007995	30.3484	-1.27301	0.390556	-3.25947	0.00111619	0.00433164	3.85409	4.04	4.02808	1.85015	2.12489	1.22464	--	--	--	--	--	--	--	--	Uncharacterized protein {ECO:0000313|EMBL:CDJ39108.1} OS=Eimeria tenella (Coccidian parasite) PE=4 SV=1	hypothetical protein, conserved [Eimeria tenella]	Fonticula alba hypothetical protein mRNA
EVM0004973	537.366	-1.27445	0.12421	-10.2605	1.06201e-24	7.80999e-23	9.88788	10.9671	10.5363	3.88479	4.43288	5.26723	--	--	Molecular Function: catalytic activity (GO:0003824);;	--	[R]	General function prediction only	Guanylate-binding protein, N-terminal domain	--	Guanylate binding protein, putative {ECO:0000313|EMBL:CDJ43216.1} OS=Eimeria tenella (Coccidian parasite) PE=4 SV=1	guanylate binding protein, putative [Eimeria tenella]	--
EVM0002750	67.9475	-1.28929	0.247165	-5.21631	1.82526e-07	1.72532e-06	7.4234	9.51533	8.10605	3.17484	3.09934	4.39996	--	--	--	--	--	--	--	--	Uncharacterized protein {ECO:0000313|EMBL:CDJ67583.1} OS=Eimeria necatrix PE=4 SV=1	hypothetical protein, conserved [Eimeria necatrix]	Eimeria tenella hypothetical protein, conserved (stchr1_040106_646631) partial mRNA
EVM0007060	1162.35	-1.29465	0.0894315	-14.4764	1.70701e-47	6.60704e-45	102.508	112.058	103.424	50.1873	42.812	42.1421	--	--	--	--	--	--	--	--	SAG family member {ECO:0000313|EMBL:CDJ37354.1} OS=Eimeria tenella (Coccidian parasite) PE=4 SV=1	SAG family member [Eimeria tenella]	--
EVM0001331	33.0351	-1.29531	0.361082	-3.58729	0.000334135	0.00148294	12.1716	11.9178	7.0833	3.47939	5.48031	4.44162	--	--	--	--	--	--	--	--	Uncharacterized protein {ECO:0000313|EMBL:CDJ42945.1} OS=Eimeria tenella (Coccidian parasite) PE=4 SV=1	hypothetical protein, conserved [Eimeria tenella]	--
EVM0000920	151.388	-1.29974	0.210714	-6.1683	6.9029e-10	9.9929e-09	15.4589	17.8813	18.6697	8.25067	4.9619	8.48975	--	--	--	--	--	--	--	--	--	--	Drosophila melanogaster SNS (sns) mRNA, complete cds
EVM0003812	2239.78	-1.30391	0.0798809	-16.3231	6.75917e-60	4.97069e-57	86.3237	89.6481	82.8438	32.4171	37.8648	39.5885	--	--	--	K13845|4.23408e-118|tgo:TGME49_100130|apical membrane antigen, putative; K13845 apical merozoite antigen 1 (A)	--	--	Apical membrane antigen 1	Apical membrane antigen 1, soluble form (Precursor) GN=AMA1 OS=Toxoplasma gondii PE=1 SV=1	Apical membrane antigen, putative {ECO:0000313|EMBL:CDJ36979.1} OS=Eimeria tenella (Coccidian parasite) PE=4 SV=1	apical membrane antigen, putative [Eimeria tenella]	Eimeria tenella invasion-associated protein MA1 (ma-1) mRNA, complete cds
EVM0000240	62.2189	-1.30733	0.305636	-4.27741	1.89082e-05	0.000115108	3.58722	3.7466	5.62879	2.40899	1.16651	1.81003	--	--	--	--	--	--	--	--	Uncharacterized protein {ECO:0000313|EMBL:CDJ44487.1} OS=Eimeria tenella (Coccidian parasite) PE=4 SV=1	hypothetical protein ETH_00037795 [Eimeria tenella]	Drosophila sechellia GM12724 (Dsec\GM12724), mRNA
EVM0005985	32.4997	-1.31378	0.401503	-3.27214	0.00106735	0.00416629	3.84149	3.68465	3.66209	1.4343	2.10029	1.24607	[C]	Energy production and conversion	--	K00121|1.38855e-52|tgo:TGME49_111780|alcohol dehydrogenase class III, putative (EC:1.1.1.284); K00121 S-(hydroxymethyl)glutathione dehydrogenase / alcohol dehydrogenase [EC:1.1.1.284 1.1.1.1] (A)	[Q]	Secondary metabolites biosynthesis, transport and catabolism	Zinc-binding dehydrogenase	Alcohol dehydrogenase class-3 OS=Octopus vulgaris (Common octopus) PE=1 SV=1	Alcohol dehydrogenase class-3, related {ECO:0000313|EMBL:CDJ43778.1} OS=Eimeria tenella (Coccidian parasite) PE=4 SV=1	Alcohol dehydrogenase class-3, related [Eimeria tenella]	Drosophila ananassae GF16175 (Dana\GF16175), mRNA
EVM0001168	106.277	-1.31417	0.284533	-4.61871	3.86134e-06	2.78818e-05	3.95204	4.932	5.43978	1.17886	1.62469	3.17695	#N/A	#N/A	#N/A	#N/A	#N/A	#N/A	#N/A	#N/A	#N/A	#N/A	#N/A
EVM0004577	23.0898	-1.31765	0.439565	-2.99762	0.00272094	0.009281	1.60847	1.48494	1.41449	0.656858	0.724222	0.521741	--	--	--	--	--	--	--	--	Uncharacterized protein {ECO:0000313|EMBL:CDJ39934.1} OS=Eimeria tenella (Coccidian parasite) PE=4 SV=1	hypothetical protein, conserved [Eimeria tenella]	--
EVM0006223	8741.26	-1.32693	0.0700791	-18.9347	5.90445e-80	1.08553e-76	225.69	245.82	226.491	100.932	91.9645	97.7319	--	--	Molecular Function: organic cyclic compound binding (GO:0097159);; Molecular Function: heterocyclic compound binding (GO:1901363);;	--	--	--	--	--	Uncharacterized protein {ECO:0000313|EMBL:CDJ39089.1} OS=Eimeria tenella (Coccidian parasite) PE=4 SV=1	hypothetical protein, conserved [Eimeria tenella]	Eimeria tenella chromosome 1, ordered contigs
EVM0000950	902.497	-1.35213	0.129966	-10.4038	2.38352e-25	1.86472e-23	15.7729	16.629	17.3115	5.69024	5.62104	8.98071	--	--	--	--	[O]	Posttranslational modification, protein turnover, chaperones	FHA domain	Uncharacterized RING finger protein T02C1.1 GN=T02C1.1 OS=Caenorhabditis elegans PE=3 SV=1	Zinc finger (C3HC4 type) / FHA domain-containing protein, putative {ECO:0000313|EMBL:CDJ68656.1} (Fragment) OS=Eimeria necatrix PE=4 SV=1	zinc finger (C3HC4 type) / FHA domain-containing protein, putative, partial [Eimeria necatrix]	Toxoplasma gondii ME49 zinc finger (C3HC4 type) / FHA domain-containing protein, mRNA
EVM0003835	110.89	-1.3603	0.216354	-6.28741	3.22814e-10	4.83498e-09	5.37769	4.7854	5.35029	1.76892	2.08965	2.47318	--	--	Cellular Component: membrane (GO:0016020);;	--	[I]	Lipid transport and metabolism	Plasma-membrane choline transporter	CTL-like protein 1 GN=CG1311 OS=Drosophila melanogaster (Fruit fly) PE=2 SV=1	Uncharacterized protein {ECO:0000313|EMBL:CDJ58173.1} OS=Eimeria maxima (Coccidian parasite) PE=4 SV=1	hypothetical protein, conserved [Eimeria maxima]	Hammondia hammondi hypothetical protein partial mRNA
EVM0000385	561.413	-1.36558	0.140472	-9.72136	2.44486e-22	1.46175e-20	21.8894	23.2683	18.0562	7.75193	8.38761	9.51958	--	--	--	--	--	--	--	--	Uncharacterized protein {ECO:0000313|EMBL:CDJ41780.1} OS=Eimeria tenella (Coccidian parasite) PE=4 SV=1	hypothetical protein, conserved [Eimeria tenella]	--
EVM0001397	28.9315	-1.3694	0.456816	-2.9977	0.00272028	0.009281	7.42397	9.48991	4.78569	2.37877	3.08555	3.33432	--	--	--	--	--	--	--	--	Uncharacterized protein {ECO:0000313|EMBL:CDJ40245.1} (Fragment) OS=Eimeria tenella (Coccidian parasite) PE=4 SV=1	hypothetical protein, conserved, partial [Eimeria tenella]	Drosophila grimshawi GH20224 (Dgri\GH20224), mRNA
EVM0002548	29.5598	-1.41715	0.448262	-3.16144	0.0015699	0.0058634	3.96741	4.51127	2.97917	0.501736	2.24734	1.8681	#N/A	#N/A	#N/A	#N/A	#N/A	#N/A	#N/A	#N/A	#N/A	#N/A	#N/A
EVM0001662	28.9706	-1.42483	0.388792	-3.66477	0.000247559	0.00114934	1.40375	1.44148	1.94779	0.539534	0.81794	0.535688	#N/A	#N/A	#N/A	#N/A	#N/A	#N/A	#N/A	#N/A	#N/A	#N/A	#N/A
EVM0003889	92.828	-1.45439	0.277	-5.2505	1.51684e-07	1.46581e-06	4.19605	2.23548	2.26497	1.25165	1.15001	0.917249	--	--	--	--	--	--	COPI associated protein	--	Chromosome III, complete sequence, related {ECO:0000313|EMBL:CDJ38500.1} OS=Eimeria tenella (Coccidian parasite) PE=4 SV=1	Chromosome III, complete sequence, related [Eimeria tenella]	--
EVM0007474	61.1431	-1.46615	0.324324	-4.52064	6.16531e-06	4.22945e-05	5.02391	5.05973	4.32581	1.85309	2.33501	1.3142	[R]	General function prediction only	--	--	--	--	TPR repeat	--	TPR domain-containing protein, putative {ECO:0000313|EMBL:CDJ42898.1} OS=Eimeria tenella (Coccidian parasite) PE=4 SV=1	TPR domain-containing protein, putative [Eimeria tenella]	--
EVM0007941	31.4589	-1.47936	0.383554	-3.85699	0.000114791	0.00058219	1.53111	1.24549	1.56275	0.346302	0.676134	0.630362	--	--	--	--	--	--	--	--	IQ calmodulin-binding motif domain-containing protein, putative {ECO:0000313|EMBL:CDJ64148.1} OS=Eimeria necatrix PE=4 SV=1	IQ calmodulin-binding motif domain-containing protein, putative [Eimeria necatrix]	Glyptapanteles flavicoxis clone BAC 16K15, complete sequence
EVM0005537	65.1421	-1.48967	0.292109	-5.09968	3.4022e-07	3.02433e-06	3.54066	2.95242	1.98518	0.858221	1.07994	1.22258	[R]	General function prediction only	--	--	[TZ]	--	PX domain	--	Uncharacterized protein {ECO:0000313|EMBL:CDJ45103.1} (Fragment) OS=Eimeria tenella (Coccidian parasite) PE=4 SV=1	hypothetical protein ETH_00014340, partial [Eimeria tenella]	Drosophila mojavensis GI18399 (Dmoj\GI18399), mRNA
EVM0001350	115.626	-1.49281	0.286482	-5.21083	1.88e-07	1.7725e-06	4.00132	5.45979	4.59708	1.86596	2.70242	0.722225	--	--	--	--	--	--	--	--	Uncharacterized protein {ECO:0000313|EMBL:CDJ37601.1} OS=Eimeria tenella (Coccidian parasite) PE=4 SV=1	hypothetical protein, conserved [Eimeria tenella]	--
EVM0006657	70.4098	-1.50226	0.30648	-4.90168	9.50228e-07	7.78171e-06	1.42974	1.51284	1.83682	0.798201	0.293353	0.63401	--	--	--	--	--	--	--	--	Uncharacterized protein {ECO:0000313|EMBL:CDJ43409.1} OS=Eimeria tenella (Coccidian parasite) PE=4 SV=1	hypothetical protein, conserved [Eimeria tenella]	--
EVM0004429	17.364	-1.51352	0.499361	-3.0309	0.00243824	0.00847393	3.02611	2.08984	3.62276	1.52532	0.700727	0.925493	--	--	--	--	--	--	--	--	Uncharacterized protein {ECO:0000313|EMBL:CDJ40532.1} OS=Eimeria tenella (Coccidian parasite) PE=4 SV=1	hypothetical protein, conserved [Eimeria tenella]	Spirometra erinaceieuropaei genome assembly S_erinaceieuropaei ,scaffold SPER_contig0108821
EVM0000068	53.6577	-1.53303	0.29624	-5.17495	2.27969e-07	2.11205e-06	5.79864	5.34877	5.70204	1.54032	1.68364	2.84773	--	--	Biological Process: cellular protein modification process (GO:0006464);; Molecular Function: ligase activity (GO:0016874);;	--	[O]	Posttranslational modification, protein turnover, chaperones	Tubulin-tyrosine ligase family	Probable beta-tubulin polyglutamylase GN=Ttll6a OS=Tetrahymena thermophila (strain SB210) PE=3 SV=1	Tubulin-tyrosine ligase family protein, putative {ECO:0000313|EMBL:CDJ40401.1} OS=Eimeria tenella (Coccidian parasite) PE=4 SV=1	tubulin-tyrosine ligase family protein, putative [Eimeria tenella]	Neospora caninum Liverpool putative tubulin-tyrosine ligase family protein (NCLIV_019050) mRNA, complete cds
EVM0003124	40.3672	-1.55892	0.359634	-4.33472	1.45944e-05	9.19683e-05	2.45969	2.19412	1.86495	0.723223	0.379711	1.16259	--	--	--	--	--	--	--	--	Uncharacterized protein {ECO:0000313|EMBL:CDJ40148.1} OS=Eimeria tenella (Coccidian parasite) PE=4 SV=1	hypothetical protein, conserved [Eimeria tenella]	Drosophila virilis GJ16544 (Dvir\GJ16544), mRNA
EVM0006102	27.9547	-1.5641	0.400944	-3.90105	9.57753e-05	0.000493575	1.63622	1.90423	1.25268	0.498917	0.392917	0.778425	--	--	--	--	--	--	--	--	Uncharacterized protein {ECO:0000313|EMBL:CDJ38401.1} OS=Eimeria tenella (Coccidian parasite) PE=4 SV=1	hypothetical protein ETH_00043525 [Eimeria tenella]	Anopheles gambiae retrotransposon RTAg4 DNA, complete sequence
EVM0004862	67.1989	-1.57113	0.304113	-5.16628	2.38796e-07	2.20063e-06	4.12619	5.75777	3.33283	1.80278	0.80581	1.93506	[KR]	--	--	--	--	--	Acetyltransferase (GNAT) family	Diamine acetyltransferase {ECO:0000305|PubMed:17289169} OS=Cryptosporidium parvum (strain Iowa II) PE=1 SV=1	Acetyltransferase domain-containing protein, putative {ECO:0000313|EMBL:CDJ42495.1} OS=Eimeria tenella (Coccidian parasite) PE=4 SV=1	acetyltransferase domain-containing protein, putative [Eimeria tenella]	--
EVM0000477	31.9895	-1.59173	0.432162	-3.68317	0.000230351	0.00107693	3.79979	6.18189	5.44322	2.00532	1.77668	1.56438	[P]	Inorganic ion transport and metabolism	--	K01530|1.44381e-19|tgo:TGME49_047690|p-type ATPase2, putative (EC:3.6.3.1); K01530 phospholipid-translocating ATPase [EC:3.6.3.1] (A)	[R]	General function prediction only	--	--	ATPase 2, putative {ECO:0000313|EMBL:CDJ44583.1} OS=Eimeria tenella (Coccidian parasite) PE=4 SV=1	ATPase 2, putative [Eimeria tenella]	Spirometra erinaceieuropaei genome assembly S_erinaceieuropaei ,scaffold SPER_scaffold0052067
EVM0006274	26.5808	-1.59853	0.442763	-3.61034	0.000305793	0.00136923	0.955806	1.73272	1.37947	0.327875	0.645536	0.465054	--	--	--	--	--	--	--	--	Uncharacterized protein {ECO:0000313|EMBL:CDJ38582.1} (Fragment) OS=Eimeria tenella (Coccidian parasite) PE=4 SV=1	hypothetical protein, conserved, partial [Eimeria tenella]	Anopheles gambiae str. PEST AGAP013096-PA (AgaP_AGAP013096) mRNA, complete cds
EVM0002339	33.818	-1.61654	0.533265	-3.0314	0.00243422	0.00846794	0.281983	0.0946644	0.19449	0.0511798	0	0.132119	--	--	--	--	[N]	Cell motility	Tctex-1 family	--	WD domain-containing protein, putative {ECO:0000313|EMBL:CDI80606.1} OS=Eimeria acervulina (Coccidian parasite) PE=4 SV=1	WD domain-containing protein, putative [Eimeria acervulina]	--
EVM0005444	120.261	-1.6382	0.21697	-7.55034	4.34137e-14	1.11631e-12	10.1045	7.53265	9.96205	3.1555	3.74674	2.45821	--	--	--	--	--	--	--	--	Uncharacterized protein {ECO:0000313|EMBL:CDJ41918.1} OS=Eimeria tenella (Coccidian parasite) PE=4 SV=1	hypothetical protein, conserved [Eimeria tenella]	--
EVM0007475	19.0173	-1.72695	0.556925	-3.10086	0.00192962	0.00693568	1.19224	0.621074	0.689047	0.241762	0.22213	0.320052	--	--	--	--	--	--	--	--	Uncharacterized protein {ECO:0000313|EMBL:CDJ69345.1} OS=Eimeria necatrix PE=4 SV=1	hypothetical protein, conserved [Eimeria necatrix]	--
EVM0008195	1280.21	-1.78398	0.0899404	-19.8352	1.47943e-87	5.43986e-84	128.855	130.722	139.539	36.3879	42.9172	42.255	--	--	--	--	--	--	--	Sporozoite antigen OS=Eimeria tenella (Coccidian parasite) PE=2 SV=2	Sporozoite antigen {ECO:0000313|EMBL:CDJ44154.1} OS=Eimeria tenella (Coccidian parasite) PE=4 SV=1	sporozoite antigen [Eimeria acervulina]	Eimeria tenella mRNA for sporozoite antigen
EVM0004417	25.8221	-1.80374	0.482707	-3.73672	0.000186437	0.00089378	0.53339	0.477505	0.864547	0.19362	0.266846	0.115344	--	--	Molecular Function: hydrolase activity (GO:0016787);;	--	[H]	Coenzyme transport and metabolism	Peptidase C26	Gamma-glutamyl hydrolase B (Precursor) GN=gghB OS=Dictyostelium discoideum (Slime mold) PE=3 SV=1	Gamma-glutamyl hydrolase, putative {ECO:0000313|EMBL:CDJ41888.1} OS=Eimeria tenella (Coccidian parasite) PE=4 SV=1	gamma-glutamyl hydrolase, putative [Eimeria tenella]	Hammondia hammondi gamma-glutamyl hydrolase partial mRNA
EVM0003281	59.1479	-1.80731	0.300972	-6.0049	1.91446e-09	2.55981e-08	2.15446	2.4798	2.23535	0.482648	0.997774	0.628961	--	--	--	--	--	--	--	Probable cubilin (Precursor) GN=ZC116.3 OS=Caenorhabditis elegans PE=1 SV=4	ADR200Cp, related {ECO:0000313|EMBL:CDJ52844.1} OS=Eimeria brunetti PE=4 SV=1	ADR200Cp, related [Eimeria brunetti]	Eimeria tenella chromosome 1, ordered contigs
EVM0006288	215.109	-1.82688	0.154914	-11.7929	4.24542e-32	5.20347e-30	19.1901	20.1252	18.6841	5.39712	5.74776	5.9676	--	--	--	K05293|5.66608e-79|tgo:TGME49_077570|GPI transamidase subunit PIG-U, putative; K05293 phosphatidylinositol glycan, class U (A)	--	--	--	--	Uncharacterized protein {ECO:0000313|EMBL:CDJ41637.1} OS=Eimeria tenella (Coccidian parasite) PE=4 SV=1	hypothetical protein, conserved [Eimeria tenella]	--
EVM0005945	1400.9	-1.83482	0.0769114	-23.8563	8.70585e-126	6.40228e-122	67.0845	72.7578	69.5036	19.3396	20.2023	21.8577	--	--	--	K05293|3.02672e-139|tgo:TGME49_077570|GPI transamidase subunit PIG-U, putative; K05293 phosphatidylinositol glycan, class U (A)	--	--	--	--	GPI transamidase subunit PIG-U, putative {ECO:0000313|EMBL:CDJ44399.1} (Fragment) OS=Eimeria tenella (Coccidian parasite) PE=4 SV=1	GPI transamidase subunit PIG-U, putative, partial [Eimeria tenella]	Hammondia hammondi Toxoplasma gondii family D protein partial mRNA
EVM0003113	41.274	-1.84427	0.368708	-5.00199	5.67426e-07	4.8578e-06	3.60838	1.70349	2.83489	0.699946	0.761575	0.914418	--	--	--	--	--	--	--	--	Uncharacterized protein {ECO:0000313|EMBL:CDJ37469.1} OS=Eimeria tenella (Coccidian parasite) PE=4 SV=1	hypothetical protein, conserved [Eimeria tenella]	--
EVM0000017	18.4721	-1.87258	0.587061	-3.18975	0.00142398	0.00537574	1.22654	1.93013	1.39189	0.676197	0.465965	0.149195	--	--	--	--	--	--	--	--	Uncharacterized protein {ECO:0000313|EMBL:CDJ37490.1} OS=Eimeria tenella (Coccidian parasite) PE=4 SV=1	hypothetical protein, conserved [Eimeria tenella]	Eimeria tenella chromosome 1, ordered contigs
EVM0000363	184.737	-1.91571	0.207749	-9.22128	2.93583e-20	1.49931e-18	17.8345	18.1408	15.074	5.1872	6.18776	2.85643	--	--	--	--	--	--	Sporozoite TA4 surface antigen	Sporulated oocyst TA4 antigen 8 kDa subunit (Precursor) OS=Eimeria tenella (Coccidian parasite) PE=1 SV=2	SAG family member {ECO:0000313|EMBL:CDJ39898.1} OS=Eimeria tenella (Coccidian parasite) PE=4 SV=1	SAG family member [Eimeria tenella]	Drosophila persimilis GL14808 (Dper\GL14808), mRNA
EVM0008138	65.7445	-1.92241	0.31181	-6.16533	7.03356e-10	1.0162e-08	5.7621	4.11498	3.41425	1.06103	1.55665	1.08745	--	--	--	--	--	--	--	--	Uncharacterized protein {ECO:0000313|EMBL:CDJ53575.1} OS=Eimeria brunetti PE=4 SV=1	hypothetical protein, conserved [Eimeria brunetti]	--
EVM0007011	70.48	-1.95033	0.293625	-6.64226	3.08903e-11	5.29528e-10	3.82976	3.63822	2.65553	0.958351	1.17404	0.634347	[I]	Lipid transport and metabolism	Biological Process: metabolic process (GO:0008152);; Molecular Function: ligase activity (GO:0016874);;	K15013|0|tgo:TGME49_097220|very long-chain acyl-CoA synthetase, putative (EC:6.2.1.3); K15013 long-chain-fatty-acid--CoA ligase ACSBG [EC:6.2.1.3] (A)	[I]	Lipid transport and metabolism	AMP-binding enzyme	Very long-chain-fatty-acid--CoA ligase bubblegum GN=bgm OS=Drosophila melanogaster (Fruit fly) PE=2 SV=1	Very long-chain acyl-CoA synthetase, putative {ECO:0000313|EMBL:CDJ40499.1} OS=Eimeria tenella (Coccidian parasite) PE=4 SV=1	very long-chain acyl-CoA synthetase, putative [Eimeria tenella]	Toxoplasma gondii ME49 very long-chain acyl-CoA synthetase, putative, mRNA
EVM0001732	49.8425	-2.02752	0.363199	-5.58239	2.37232e-08	2.66759e-07	1.41198	1.2377	1.63124	0.38441	0.388514	0.330781	--	--	--	--	--	--	--	--	Uncharacterized protein {ECO:0000313|EMBL:CDJ33777.1} OS=Eimeria mitis PE=4 SV=1	hypothetical protein, conserved [Eimeria mitis]	--
EVM0004956	18.4201	-2.08547	0.573542	-3.63612	0.000276776	0.00126188	0.594167	0.897605	0.622401	0.109189	0.200645	0.216822	[RTKL]	--	Molecular Function: transferase activity (GO:0016740);;	--	[D]	Cell cycle control, cell division, chromosome partitioning	Protein kinase domain	Developmentally-regulated protein kinase 1 GN=pkaD OS=Dictyostelium discoideum (Slime mold) PE=2 SV=2	Uncharacterized protein {ECO:0000313|EMBL:CDJ37298.1} OS=Eimeria tenella (Coccidian parasite) PE=4 SV=1	hypothetical protein, conserved [Eimeria tenella]	--
EVM0001665	10.179	-2.17176	0.660225	-3.28942	0.00100395	0.00394814	1.31724	1.62814	1.22652	0.352099	0.323507	0.291325	--	--	--	--	--	--	--	--	Uncharacterized protein {ECO:0000313|EMBL:CDJ60515.1} OS=Eimeria maxima (Coccidian parasite) PE=4 SV=1	hypothetical protein, conserved [Eimeria maxima]	--
EVM0006824	12.2362	-2.18537	0.672412	-3.25004	0.00115388	0.00446613	3.02842	4.14802	1.57912	0.712357	0.163628	1.06092	--	--	--	--	--	--	--	--	--	--	PREDICTED: Harpegnathos saltator neurogenic locus Notch protein (LOC105190346), mRNA
EVM0003353	285.15	-2.2074	0.180262	-12.2455	1.7754e-34	2.56006e-32	15.751	18.3429	17.2901	4.07017	4.48759	3.11747	--	--	--	--	--	--	--	--	56 kDa gametocyte antigen, related {ECO:0000313|EMBL:CDJ41536.1} OS=Eimeria tenella (Coccidian parasite) PE=4 SV=1	56 kDa gametocyte antigen, related [Eimeria tenella]	Eimeria maxima 56 kDa gametocyte antigen (gam56) mRNA, complete cds
EVM0004362	18.177	-2.24456	0.580238	-3.86834	0.000109578	0.000558723	0.815642	1.5309	1.17372	0.181684	0.400634	0.216467	--	--	--	--	--	--	--	--	Uncharacterized protein {ECO:0000313|EMBL:CDJ39320.1} OS=Eimeria tenella (Coccidian parasite) PE=4 SV=1	hypothetical protein, conserved [Eimeria tenella]	Schistocephalus solidus genome assembly S_solidus_NST_G2 ,scaffold SSLN_scaffold0000133
EVM0006416	15.6711	-2.28817	0.549907	-4.16102	3.16833e-05	0.000183175	4.56564	6.89729	5.23225	0.688428	1.18598	1.7088	--	--	--	--	--	--	--	--	Uncharacterized protein {ECO:0000313|EMBL:CDJ67447.1} OS=Eimeria necatrix PE=4 SV=1	hypothetical protein, conserved [Eimeria necatrix]	Eimeria tenella malonyl-CoA:acyl carrier protein transacylase mRNA, complete cds
EVM0008265	18.4726	-2.29919	0.619694	-3.7102	0.000207096	0.000982568	1.45476	0.78489	0.677282	0.101843	0.280719	0.252793	[R]	General function prediction only	--	--	[R]	General function prediction only	WD domain, G-beta repeat	General transcriptional corepressor tupA GN=tupA OS=Dictyostelium discoideum (Slime mold) PE=2 SV=1	Uncharacterized protein {ECO:0000313|EMBL:CDJ55929.1} OS=Eimeria maxima (Coccidian parasite) PE=4 SV=1	hypothetical protein, conserved [Eimeria maxima]	--
EVM0006946	12.2519	-2.30009	0.695679	-3.30626	0.000945517	0.00375076	1.43069	1.13213	3.14009	0.100159	0.552151	0.596668	--	--	--	--	--	--	--	--	Uncharacterized protein {ECO:0000313|EMBL:CDJ40169.1} OS=Eimeria tenella (Coccidian parasite) PE=4 SV=1	hypothetical protein, conserved [Eimeria tenella]	Eimeria tenella chromosome 1, ordered contigs
EVM0006251	7.71567	-2.91711	0.950136	-3.07021	0.00213909	0.00755929	0.989459	0.770033	0.251267	0.0440804	0	0.218831	--	--	--	--	--	--	--	--	Uncharacterized protein {ECO:0000313|EMBL:CDJ40872.1} OS=Eimeria tenella (Coccidian parasite) PE=4 SV=1	hypothetical protein, conserved [Eimeria tenella]	Drosophila mojavensis GI14833 (Dmoj\GI14833), mRNA
EVM0005171	42.2153	-3.25591	0.393552	-8.27313	1.30492e-16	4.77431e-15	3.26656	4.37516	3.70007	0.495085	0.181953	0.524327	--	--	--	--	--	--	--	--	Uncharacterized protein {ECO:0000313|EMBL:CDJ44141.1} OS=Eimeria tenella (Coccidian parasite) PE=4 SV=1	hypothetical protein, conserved [Eimeria tenella]	Drosophila willistoni GK19787 (Dwil\GK19787), mRNA
EVM0000536	15.8299	-3.30991	0.602842	-5.49051	4.00764e-08	4.33414e-07	2.73242	4.97117	4.84225	0.172777	0.47624	0.686181	--	--	--	--	--	--	--	--	Uncharacterized protein {ECO:0000313|EMBL:CDJ40532.1} OS=Eimeria tenella (Coccidian parasite) PE=4 SV=1	hypothetical protein, conserved [Eimeria tenella]	Spirometra erinaceieuropaei genome assembly S_erinaceieuropaei ,scaffold SPER_contig0108821
EVM0000959	5.45197	-3.48798	1.13317	-3.07808	0.00208338	0.00740153	0.218163	0.219719	0.507845	0.0267277	0.0368359	0.0265372	--	--	--	--	--	--	RNA dependent RNA polymerase	--	RNA dependent RNA polymerase domain-containing protein, putative {ECO:0000313|EMBL:CDJ42073.1} OS=Eimeria tenella (Coccidian parasite) PE=4 SV=1	RNA dependent RNA polymerase domain-containing protein, putative [Eimeria tenella]	Echinostoma caproni genome assembly E_caproni_Egypt ,scaffold ECPE_scaffold0003098

## Sheet: T4_VS_T2
Supplementary Dataset 4: Differentially expressed genes between 2 and 4 h of toltrazuril treatment (T4 vs. T2).
	baseMean	log2FoldChange	lfcSE	stat	pvalue	padj	T2-1	T2-2	T2-3	T4-1	T4-2	T4-3	COG_class	COG_class_annotation	GO_annotation	KEGG_annotation	KOG_class	KOG_class_annotation	Pfam_annotation	Swissprot_annotation	TrEMBL_annotation	nr_annotation	nt_annotation
EVM0000120	1555.54	3.53173	0.0842863	41.9016	0	0	9.00253	8.15361	7.53645	87.2215	98.1641	100.019	--	--	--	--	--	--	--	--	Uncharacterized protein {ECO:0000313|EMBL:CDJ42045.1} OS=Eimeria tenella (Coccidian parasite) PE=4 SV=1	hypothetical protein, conserved [Eimeria tenella]	--
EVM0000398	1743.1	4.00042	0.0849207	47.1078	0	0	19.607	22.0366	19.404	308.855	317.667	346.396	--	--	--	--	--	--	Sporozoite TA4 surface antigen	Sporulated oocyst TA4 antigen 8 kDa subunit (Precursor) OS=Eimeria tenella (Coccidian parasite) PE=1 SV=2	SAG family member {ECO:0000313|EMBL:CDJ41971.1} OS=Eimeria tenella (Coccidian parasite) PE=4 SV=1	SAG family member [Eimeria tenella]	Eimeria tenella surface antigen 2 mRNA, complete cds
EVM0000822	41020.6	1.76843	0.0445949	39.6553	0	0	2803.86	2810.59	2683.6	9260.61	9555.61	9451.88	--	--	Molecular Function: actin binding (GO:0003779);; Biological Process: actin cytoskeleton organization (GO:0030036);;	K14141|9.95141e-21|cpv:cgd3_1570|sporozoite antigen; K14141 profilin-like protein (A)	--	--	--	Profilin {ECO:0000250|UniProtKB:P86294} OS=Plasmodium falciparum (isolate 3D7) PE=3 SV=1	Profilin {ECO:0000256|RuleBase:RU003909} OS=Eimeria tenella (Coccidian parasite) PE=2 SV=1	19 kDa sporozoite antigen [Eimeria tenella]	Eimeria tenella strain WAMPLER 19 kDa sporozoite antigen mRNA, complete cds
EVM0000947	36562.8	2.27455	0.0484948	46.9031	0	0	320.83	309.73	334.202	1523.61	1575.71	1569.3	--	--	--	--	--	--	--	--	Uncharacterized protein {ECO:0000313|EMBL:CDJ39886.1} OS=Eimeria tenella (Coccidian parasite) PE=2 SV=1	hypothetical protein [Eimeria tenella]	Eimeria tenella clone Etm111B05 hypothetical protein mRNA, complete cds
EVM0001635	87464.1	3.34463	0.0636393	52.5561	0	0	3000.55	2735.02	2507.3	26185.9	29196.9	28351.8	--	--	--	--	--	--	--	--	Uncharacterized protein {ECO:0000313|EMBL:CDJ40570.1} OS=Eimeria tenella (Coccidian parasite) PE=2 SV=1	hypothetical protein [Eimeria tenella]	Eimeria tenella clone Etm004B04 hypothetical protein mRNA, complete cds
EVM0002131	1424.91	3.46922	0.0872607	39.757	0	0	3.12269	3.40168	3.36533	37.9112	33.775	37.7287	[RTKL]	--	Molecular Function: kinase activity (GO:0016301);;	--	[T]	Signal transduction mechanisms	Protein kinase domain	3-phosphoinositide-dependent protein kinase 1 GN=Pdk1 OS=Drosophila melanogaster (Fruit fly) PE=1 SV=4	Protein kinase, putative {ECO:0000313|EMBL:CDJ41912.1} OS=Eimeria tenella (Coccidian parasite) PE=4 SV=1	protein kinase, putative [Eimeria tenella]	Eimeria tenella chromosome 1, ordered contigs
EVM0002245	36884.2	2.39564	0.0556912	43.0165	0	0	453.059	452.419	422.313	2183.59	2313.88	2488.73	--	--	--	--	--	--	--	--	Surface antigen 14 {ECO:0000313|EMBL:CAE52306.1} (Precursor) OS=Eimeria tenella (Coccidian parasite) PE=2 SV=1	surface antigen 14 [Eimeria tenella]	Eimeria tenella clone Etm033E09 hypothetical protein mRNA, complete cds
EVM0002260	17576.6	2.07505	0.0488602	42.4691	0	0	602.879	586.679	583.127	2445.46	2477.88	2546.05	--	--	--	--	--	--	Sporozoite TA4 surface antigen	Sporulated oocyst TA4 antigen 8 kDa subunit (Precursor) OS=Eimeria tenella (Coccidian parasite) PE=1 SV=2	Surface antigen 3 {ECO:0000313|EMBL:CAE52314.1} (Precursor) OS=Eimeria tenella (Coccidian parasite) PE=2 SV=1	surface antigen 3 [Eimeria tenella]	Eimeria tenella mRNA for surface antigen 3 (sag3 gene)
EVM0002498	2911.2	3.25566	0.0646196	50.3819	0	0	12.0251	12.1233	11.3063	115.8	113.251	109.248	--	--	--	--	--	--	--	--	Uncharacterized protein {ECO:0000313|EMBL:CDJ40299.1} OS=Eimeria tenella (Coccidian parasite) PE=4 SV=1	hypothetical protein, conserved [Eimeria tenella]	Toxoplasma gondii ME49 hypothetical protein, mRNA
EVM0002717	257265	2.74175	0.055871	49.0728	0	0	2165.33	2032.12	1884.08	13622.1	13345.5	13710.2	--	--	Cellular Component: extracellular region (GO:0005576);; Biological Process: proteolysis (GO:0006508);; Biological Process: blood coagulation (GO:0007596);;	--	[E]	Amino acid transport and metabolism	PAN domain	Micronemal protein 4 (Precursor) OS=Toxoplasma gondii PE=1 SV=1	Microneme protein 5 {ECO:0000313|EMBL:CAB52368.1} (Precursor) OS=Eimeria tenella (Coccidian parasite) PE=1 SV=1	microneme protein 5 [Eimeria tenella]	Eimeria tenella mRNA for microneme protein 5 (mic-5 gene)
EVM0002823	27801	2.29124	0.0609674	37.5813	0	0	209.496	193.617	176.923	903.337	957.729	977.863	[TZDR]	--	Molecular Function: metal ion binding (GO:0046872);;	--	[T]	Signal transduction mechanisms	EF hand	Calmodulin OS=Plasmodium falciparum PE=3 SV=4	Calmodulin, putative {ECO:0000313|EMBL:CDJ43037.1} OS=Eimeria tenella (Coccidian parasite) PE=4 SV=1	calmodulin, putative [Eimeria tenella]	Eisenia fetida clone 16-1 calmodulin mRNA, partial cds
EVM0003094	5997.67	2.32667	0.0547599	42.4885	0	0	86.9456	82.1212	82.0826	424.906	419.363	415.945	--	--	--	--	[R]	General function prediction only	Galactose oxidase, central domain	RING finger protein B GN=rngB OS=Dictyostelium discoideum (Slime mold) PE=2 SV=2	Kelch motif domain-containing protein, putative {ECO:0000313|EMBL:CDJ38960.1} OS=Eimeria tenella (Coccidian parasite) PE=4 SV=1	kelch motif domain-containing protein, putative [Eimeria tenella]	--
EVM0003421	71668.3	3.57012	0.063064	56.611	0	0	429.829	416.298	425.355	4786.87	4953.89	5361.29	[Z]	Cytoskeleton	Molecular Function: structural constituent of cytoskeleton (GO:0005200);; Molecular Function: ATP binding (GO:0005524);; Cellular Component: cytoplasm (GO:0005737);; Cellular Component: actin filament (GO:0005884);; Biological Process: cytoskeleton organization (GO:0007010);; Biological Process: actin polymerization-dependent cell motility involved in migration of symbiont in host (GO:0070359);;	K10355|0|tgo:TGME49_009030|actin; K10355 actin, other eukaryote (A)	[Z]	Cytoskeleton	Actin	Actin GN=ACT1 OS=Toxoplasma gondii PE=3 SV=1	Actin, putative {ECO:0000313|EMBL:CDJ63179.1} OS=Eimeria necatrix PE=3 SV=1	hypothetical protein [Eimeria tenella]	Eimeria tenella clone Etm008A10 hypothetical protein mRNA, complete cds
EVM0003493	8910.84	2.60426	0.0631093	41.266	0	0	48.4538	51.5262	52.0443	309.136	315.529	299.688	--	--	--	--	--	--	--	--	Lysophospholipase, putative {ECO:0000313|EMBL:CDJ38175.1} OS=Eimeria tenella (Coccidian parasite) PE=4 SV=1	lysophospholipase, putative [Eimeria tenella]	Anopheles merus clone r2b microsatellite sequence
EVM0003515	12274.4	-2.1448	0.0480002	-44.6831	0	0	504.636	504.734	507.068	114.164	116.718	112.052	[R]	General function prediction only	--	K14573|4.75402e-23|bbo:BBOV_IV000270|21.m02926; RNA binding protein; K14573 nucleolar protein 4 (A)	[A]	RNA processing and modification	RNA recognition motif (a.k.a. RRM, RBD, or RNP domain)	--	Uncharacterized protein {ECO:0000313|EMBL:CDJ37820.1} OS=Eimeria tenella (Coccidian parasite) PE=4 SV=1	hypothetical protein, conserved [Eimeria tenella]	Anopheles arabiensis clone a2b microsatellite sequence
EVM0004220	5924.72	2.98864	0.0766571	38.9871	0	0	211.164	217.992	196.468	1450.44	1801.99	1709.58	--	--	--	--	--	--	--	--	Uncharacterized protein {ECO:0000313|EMBL:CDJ42366.1} OS=Eimeria tenella (Coccidian parasite) PE=4 SV=1	hypothetical protein, conserved [Eimeria tenella]	--
EVM0004251	10650	2.62315	0.0647748	40.4964	0	0	311.014	280.317	267.822	1701.71	1731.82	1859.78	--	--	--	--	--	--	Sporozoite TA4 surface antigen	Sporulated oocyst TA4 antigen 8 kDa subunit (Precursor) OS=Eimeria tenella (Coccidian parasite) PE=1 SV=2	SAG family member {ECO:0000313|EMBL:CDJ40599.1} OS=Eimeria tenella (Coccidian parasite) PE=4 SV=1	SAG family member [Eimeria tenella]	Eimeria tenella clone Etm077D07 hypothetical protein mRNA, complete cds
EVM0004491	2590.76	3.54326	0.0814383	43.5085	0	0	23.4562	24.0584	25.9879	271.292	285.374	300.863	--	--	--	--	--	--	Sporozoite TA4 surface antigen	Sporulated oocyst TA4 antigen 8 kDa subunit (Precursor) OS=Eimeria tenella (Coccidian parasite) PE=1 SV=2	Surface antigen 4 {ECO:0000313|EMBL:CAE52296.1} (Precursor) OS=Eimeria tenella (Coccidian parasite) PE=2 SV=1	surface antigen 4 [Eimeria tenella]	Eimeria tenella clone Etm125D09 hypothetical protein mRNA, complete cds
EVM0004627	1991.44	3.74358	0.0737429	50.7653	0	0	7.13807	6.58063	7.47449	93.6951	95.6012	95.5348	--	--	--	--	--	--	--	--	Uncharacterized protein {ECO:0000313|EMBL:CDJ42378.1} OS=Eimeria tenella (Coccidian parasite) PE=4 SV=1	hypothetical protein, conserved [Eimeria tenella]	Haliotis discus hannai clone CHh522 microsatellite sequence
EVM0004731	22718.6	-2.36205	0.0600075	-39.3626	0	0	5423.08	4912.96	4864	927.818	1021.4	1006.99	[B]	Chromatin structure and dynamics	Cellular Component: nucleosome (GO:0000786);; Molecular Function: DNA binding (GO:0003677);; Cellular Component: nucleus (GO:0005634);; Biological Process: nucleosome assembly (GO:0006334);; Molecular Function: protein heterodimerization activity (GO:0046982);;	K11253|1.85027e-78|tgo:TGME49_061240|histone H3; K11253 histone H3 (A)	[B]	Chromatin structure and dynamics	Core histone H2A/H2B/H3/H4	Histone H3 OS=Urechis caupo (Innkeeper worm) PE=1 SV=2	Histone H3 {ECO:0000256|RuleBase:RU004471} OS=Eimeria maxima (Coccidian parasite) PE=3 SV=1	histone 3 [Eimeria tenella]	Eimeria tenella histone 3 (H3) mRNA, complete cds
EVM0004739	27846.3	2.36974	0.0567282	41.7735	0	0	1543.96	1590.2	1479.19	7600.53	8133.8	8105.53	--	--	--	--	--	--	--	--	Surface antigen 17 {ECO:0000313|EMBL:CAE52302.1} (Precursor) OS=Eimeria tenella (Coccidian parasite) PE=2 SV=1	surface antigen 17 [Eimeria tenella]	Eimeria tenella clone Etm002E02 hypothetical protein mRNA, complete cds
EVM0005140	22101.8	3.05198	0.0789411	38.6615	0	0	285.542	278.504	273.429	1972.62	2584.53	2388.2	--	--	--	--	--	--	Sporozoite TA4 surface antigen	Sporulated oocyst TA4 antigen 8 kDa subunit (Precursor) OS=Eimeria tenella (Coccidian parasite) PE=1 SV=2	SAG family member {ECO:0000313|EMBL:CDJ40617.1} OS=Eimeria tenella (Coccidian parasite) PE=4 SV=1	SAG family member [Eimeria tenella]	Eimeria tenella clone Etm041A07 hypothetical protein mRNA, complete cds
EVM0005265	4490.37	2.21933	0.0551948	40.2091	0	0	26.6649	25.9581	24.8801	117.196	126.376	117.257	--	--	--	--	--	--	Chitinase class I	--	Chitinase class I, putative {ECO:0000313|EMBL:CDJ42705.1} OS=Eimeria tenella (Coccidian parasite) PE=4 SV=1	chitinase class I, putative [Eimeria tenella]	Spirometra erinaceieuropaei genome assembly S_erinaceieuropaei ,scaffold SPER_scaffold0080508
EVM0005365	2703.85	3.41254	0.0698335	48.8669	0	0	24.1384	25.3849	26.0015	268.444	270.277	265.459	--	--	--	--	[RT]	--	p25-alpha	TPPP family protein CG45057 GN=CG45057 OS=Drosophila melanogaster (Fruit fly) PE=2 SV=1	p25-alpha domain-containing protein, putative {ECO:0000313|EMBL:CDJ44980.1} OS=Eimeria tenella (Coccidian parasite) PE=2 SV=1	hypothetical protein [Eimeria tenella]	Eimeria tenella clone Etm007C03 hypothetical protein mRNA, complete cds
EVM0005766	27274.9	3.85751	0.0672639	57.349	0	0	102.903	101.129	90.1764	1412.22	1403.45	1447.97	--	--	--	--	--	--	Sialic-acid binding micronemal adhesive repeat	Micronemal protein 1 (Precursor) OS=Toxoplasma gondii PE=1 SV=1	Microneme protein, putative {ECO:0000313|EMBL:CDJ40275.1} OS=Eimeria tenella (Coccidian parasite) PE=4 SV=1	microneme protein, putative [Eimeria tenella]	Eimeria tenella strain Houghton microneme protein 3 (mic3) mRNA, complete cds
EVM0005771	4218.63	3.57063	0.0899228	39.7078	0	0	33.5989	35.6613	28.2151	343.256	409.243	403.366	--	--	--	--	--	--	--	--	Surface antigen 13 {ECO:0000313|EMBL:CAE52304.1} (Precursor) OS=Eimeria tenella (Coccidian parasite) PE=2 SV=1	surface antigen 13 [Eimeria tenella]	Eimeria tenella mRNA for surface antigen 13 (sag13 gene)
EVM0005910	16330.2	2.29114	0.0593667	38.5931	0	0	546.163	508.194	531.464	2591.26	2618.95	2553.24	--	--	--	--	--	--	--	--	Uncharacterized protein {ECO:0000313|EMBL:CDJ37405.1} OS=Eimeria tenella (Coccidian parasite) PE=2 SV=1	hypothetical protein [Eimeria tenella]	Eimeria tenella clone Etm006F11 hypothetical protein mRNA, complete cds
EVM0006223	8741.26	3.57851	0.0695034	51.4869	0	0	72.558	64.5227	66.2775	764.113	837.633	828.985	--	--	Molecular Function: organic cyclic compound binding (GO:0097159);; Molecular Function: heterocyclic compound binding (GO:1901363);;	--	--	--	--	--	Uncharacterized protein {ECO:0000313|EMBL:CDJ39089.1} OS=Eimeria tenella (Coccidian parasite) PE=4 SV=1	hypothetical protein, conserved [Eimeria tenella]	Eimeria tenella chromosome 1, ordered contigs
EVM0006442	12099.6	1.9723	0.0492555	40.0422	0	0	88.6232	86.1232	91.0826	354.902	342.032	346.495	[HC]	--	Molecular Function: oxidoreductase activity (GO:0016491);;	--	[HC]	--	FAD binding domain	--	FAD-depdendent monooxygenase, putative {ECO:0000313|EMBL:CDJ43415.1} OS=Eimeria tenella (Coccidian parasite) PE=4 SV=1	FAD-depdendent monooxygenase, putative [Eimeria tenella]	--
EVM0006753	1764.84	3.19444	0.0727649	43.9009	0	0	28.4295	30.4942	29.9829	274.642	262.345	276.088	--	--	--	--	--	--	--	--	Uncharacterized protein {ECO:0000313|EMBL:CDJ40269.1} OS=Eimeria tenella (Coccidian parasite) PE=4 SV=1	hypothetical protein, conserved [Eimeria tenella]	Eimeria tenella clone Etm120E05 hypothetical protein mRNA, complete cds
EVM0006861	7605.29	2.53641	0.0617587	41.0696	0	0	74.0194	69.1163	70.6812	397.088	431.28	412.447	--	--	--	--	--	--	--	--	Putative uncharacterized protein {ECO:0000313|EMBL:AET50574.1} OS=Eimeria tenella (Coccidian parasite) PE=2 SV=1	hypothetical protein [Eimeria tenella]	Eimeria tenella clone Etm090C11 hypothetical protein mRNA, complete cds
EVM0007331	51890.6	2.88974	0.0694413	41.6141	0	0	762.332	802.905	659.915	5085.63	5723.97	5678.94	--	--	--	--	--	--	--	--	Surface antigen 16 {ECO:0000313|EMBL:CAE52303.1} (Precursor) OS=Eimeria tenella (Coccidian parasite) PE=2 SV=1	surface antigen 16 [Eimeria tenella]	Eimeria tenella clone Etm087H03 hypothetical protein mRNA, complete cds
EVM0007351	3049.54	2.58494	0.0648479	39.8616	0	0	71.2898	66.9084	72.2036	407.283	431.941	424.702	--	--	--	--	--	--	--	--	Uncharacterized protein {ECO:0000313|EMBL:CDJ41303.1} OS=Eimeria tenella (Coccidian parasite) PE=4 SV=1	hypothetical protein, conserved [Eimeria tenella]	Eimeria tenella clone Etm122B09 hypothetical protein mRNA, complete cds
EVM0007560	31497.5	3.67725	0.0605449	60.736	0	0	1118.3	1073.58	1097.43	13559.4	13872.7	14651.3	--	--	Molecular Function: actin binding (GO:0003779);; Cellular Component: actin cytoskeleton (GO:0015629);; Biological Process: actin filament depolymerization (GO:0030042);;	K05765|9.72753e-51|tgo:TGME49_020400|actin depolymerizing factor; K05765 cofilin (A)	[Z]	Cytoskeleton	Cofilin/tropomyosin-type actin-binding protein	Actophorin OS=Acanthamoeba castellanii (Amoeba) PE=1 SV=2	Actin depolymerizing factor, putative {ECO:0000313|EMBL:CDJ67467.1} OS=Eimeria necatrix PE=4 SV=1	actin depolymerizing factor [Eimeria tenella]	Eimeria tenella actin depolymerizing factor mRNA, complete cds
EVM0007890	5547.88	3.25328	0.0618198	52.6251	0	0	22.2805	21.5743	22.1078	208.629	207.028	213.563	[F]	Nucleotide transport and metabolism	Molecular Function: hydrolase activity (GO:0016787);;	--	[F]	Nucleotide transport and metabolism	5'-nucleotidase, C-terminal domain	Apyrase {ECO:0000303|PubMed:21842387} (Precursor) OS=Aedes albopictus (Asian tiger mosquito) PE=1 SV=1	Nucleotidase, putative {ECO:0000313|EMBL:CDJ43159.1} OS=Eimeria tenella (Coccidian parasite) PE=4 SV=1	nucleotidase, putative [Eimeria tenella]	Hammondia hammondi 5'-nucleotidase, C-terminal domain-containing protein partial mRNA
EVM0007986	14524.8	2.16386	0.0511636	42.2929	0	0	428.528	424.665	418.786	1850.26	1902.05	1947.19	--	--	--	--	--	--	Sporozoite TA4 surface antigen	Sporulated oocyst TA4 antigen 8 kDa subunit (Precursor) OS=Eimeria tenella (Coccidian parasite) PE=1 SV=2	SAG family member {ECO:0000313|EMBL:CDJ40594.1} OS=Eimeria tenella (Coccidian parasite) PE=4 SV=1	SAG family member [Eimeria tenella]	Eimeria tenella mRNA for surface antigen 9 (sag9 gene)
EVM0008176	6578.38	2.00394	0.0515836	38.8483	0	0	104.109	111.422	110.255	426.973	441.743	437.529	[J]	Translation, ribosomal structure and biogenesis	Molecular Function: GTPase activity (GO:0003924);; Molecular Function: sulfate adenylyltransferase (ATP) activity (GO:0004781);; Molecular Function: GTP binding (GO:0005525);; Biological Process: obsolete GTP catabolic process (GO:0006184);; Biological Process: translational elongation (GO:0006414);;	K03267|0|tgo:TGME49_120570|G1 to S phase transition protein, putative (EC:2.7.7.4); K03267 peptide chain release factor subunit 3 (A)	[J]	Translation, ribosomal structure and biogenesis	Elongation factor Tu GTP binding domain	Eukaryotic peptide chain release factor GTP-binding subunit GN=erf3 OS=Dictyostelium discoideum (Slime mold) PE=2 SV=1	G1 to S phase transition protein, putative {ECO:0000313|EMBL:CDJ37895.1} OS=Eimeria tenella (Coccidian parasite) PE=4 SV=1	G1 to S phase transition protein, putative [Eimeria tenella]	Neospora caninum Liverpool elongation factor 1-alpha, related (NCLIV_009700) mRNA, complete cds
EVM0008281	5756.91	2.72788	0.0530847	51.3873	0	0	25.6435	24.5972	25.216	166.512	168.516	165.101	[G]	Carbohydrate transport and metabolism	Biological Process: phosphate-containing compound metabolic process (GO:0006796);; Molecular Function: phosphofructokinase activity (GO:0008443);; Biological Process: organic substance metabolic process (GO:0071704);;	K00850|0|tgo:TGME49_040890|phosphofructokinase, putative (EC:2.7.1.90); K00850 6-phosphofructokinase 1 [EC:2.7.1.11] (A)	[G]	Carbohydrate transport and metabolism	Phosphofructokinase	Pyrophosphate--fructose 6-phosphate 1-phosphotransferase {ECO:0000255|HAMAP-Rule:MF_03185} GN=EHI_000730 OS=Entamoeba histolytica PE=1 SV=1	Phosphofructokinase, putative {ECO:0000313|EMBL:CDJ37570.1} OS=Eimeria tenella (Coccidian parasite) PE=4 SV=1	phosphofructokinase, putative [Eimeria tenella]	Hammondia hammondi 6-phosphofructokinase partial mRNA
EVM0006889	10089	2.3242	0.0625022	37.1859	1.15345e-302	2.26638e-300	225.14	234.468	214.464	1104.65	1127.83	1141.75	--	--	--	--	--	--	--	--	Uncharacterized protein {ECO:0000313|EMBL:CDJ41743.1} OS=Eimeria tenella (Coccidian parasite) PE=4 SV=1	hypothetical protein, conserved [Eimeria tenella]	Eimeria tenella clone Etm095B09 hypothetical protein mRNA, complete cds
EVM0007053	1227.59	3.03048	0.0817451	37.0723	7.84716e-301	1.50332e-298	28.2596	23.9302	26.4688	212.468	220.439	212.131	--	--	--	--	--	--	PUB domain	--	Uncharacterized protein {ECO:0000313|EMBL:CDJ43460.1} OS=Eimeria tenella (Coccidian parasite) PE=2 SV=1	hypothetical protein [Eimeria tenella]	Eimeria tenella clone Etm110H09 hypothetical protein mRNA, complete cds
EVM0002039	11364.3	1.9904	0.0537234	37.049	1.86529e-300	3.48626e-298	150.912	143.631	162.389	599.381	606.276	610.955	--	--	--	--	--	--	--	--	Uncharacterized protein {ECO:0000313|EMBL:CDJ41805.1} OS=Eimeria tenella (Coccidian parasite) PE=4 SV=1	hypothetical protein, conserved [Eimeria tenella]	Eimeria tenella clone Etm041E12 hypothetical protein mRNA, complete cds
EVM0007139	12531.5	2.01122	0.0545908	36.8418	3.9574e-297	7.22037e-295	515.485	534.409	570.32	2129.14	2188.74	2214.36	[S]	Function unknown	--	--	[T]	Signal transduction mechanisms	MORN repeat	--	Uncharacterized protein {ECO:0000313|EMBL:CDJ39415.1} OS=Eimeria tenella (Coccidian parasite) PE=4 SV=1	hypothetical protein ETH_00041320 [Eimeria tenella]	Fonticula alba hypothetical protein partial mRNA
EVM0007490	2243.93	2.6893	0.0731323	36.7731	4.97915e-296	8.87331e-294	40.9713	33.4047	34.073	233.394	233.707	233.68	--	--	--	--	--	--	--	--	Uncharacterized protein {ECO:0000313|EMBL:CDJ39229.1} OS=Eimeria tenella (Coccidian parasite) PE=4 SV=1	hypothetical protein, conserved [Eimeria tenella]	Toxoplasma gondii ME49 hypothetical protein, conserved, mRNA
EVM0005547	2183.26	2.99478	0.0815046	36.7437	1.46782e-295	2.55635e-293	26.0855	22.3589	26.2937	190.208	191.512	215.677	--	--	--	--	--	--	Sporozoite TA4 surface antigen	Sporulated oocyst TA4 antigen 8 kDa subunit (Precursor) OS=Eimeria tenella (Coccidian parasite) PE=1 SV=2	SAG family member {ECO:0000313|EMBL:CDJ62346.1} OS=Eimeria necatrix PE=4 SV=1	SAG family member [Eimeria necatrix]	Eimeria tenella mRNA for surface antigen 9 (sag9 gene)
EVM0007580	238555	1.85606	0.051021	36.3784	9.34279e-290	1.59097e-287	1965.3	1870.58	1786.06	6729.81	6557.99	7064.57	--	--	--	--	[RP]	--	von Willebrand factor type A domain	Coadhesin {ECO:0000303|PubMed:23765379} (Fragment) OS=Acropora millepora (Staghorn coral) PE=1 SV=1	Microneme protein Etmic-1 {ECO:0000313|EMBL:AAD03350.1} (Precursor) OS=Eimeria tenella (Coccidian parasite) PE=4 SV=1	microneme protein precursor Etmic-1 [Eimeria tenella]	Eimeria tenella microneme 1 precursor, mRNA, partial cds
EVM0000496	1582.17	2.85366	0.0788021	36.2131	3.79325e-287	6.31906e-285	30.6217	29.8872	33.7537	213.353	230.857	238.447	--	--	--	--	--	--	Sporozoite TA4 surface antigen	Sporulated oocyst TA4 antigen 8 kDa subunit (Precursor) OS=Eimeria tenella (Coccidian parasite) PE=1 SV=2	SAG family member {ECO:0000313|EMBL:CDJ40619.1} OS=Eimeria tenella (Coccidian parasite) PE=4 SV=1	SAG family member [Eimeria tenella]	Eimeria tenella mRNA for surface antigen 9 (sag9 gene)
EVM0005039	2053.97	2.68047	0.0742275	36.1116	1.49328e-285	2.43468e-283	101.403	119.279	121.763	711.693	721.528	759.801	--	--	--	--	--	--	--	--	--	--	Eimeria tenella clone Etm014A05 hypothetical protein mRNA, complete cds
EVM0001640	7301.79	2.00734	0.0563653	35.613	8.80786e-278	1.40614e-275	66.9429	71.991	67.1034	257.169	281.164	289.413	[S]	Function unknown	Cellular Component: extracellular region (GO:0005576);;	--	[S]	Function unknown	Cysteine-rich secretory protein family	Venom allergen 3 OS=Solenopsis richteri (Black imported fire ant) PE=1 SV=2	SCP-like domain-containing protein, putative {ECO:0000313|EMBL:CDJ37363.1} OS=Eimeria tenella (Coccidian parasite) PE=2 SV=1	hypothetical protein [Eimeria tenella]	Eimeria tenella clone Etm128F03 hypothetical protein mRNA, complete cds
EVM0004575	6797.84	2.31711	0.0652702	35.5002	4.87407e-276	7.62246e-274	103.284	99.1615	88.8102	467.36	482.572	500.883	[C]	Energy production and conversion	Molecular Function: magnesium ion binding (GO:0000287);; Molecular Function: isocitrate dehydrogenase (NADP+) activity (GO:0004450);; Biological Process: tricarboxylic acid cycle (GO:0006099);; Biological Process: isocitrate metabolic process (GO:0006102);; Molecular Function: NAD binding (GO:0051287);;	K00031|0|tgo:TGME49_113140|isocitrate dehydrogenase, putative (EC:1.1.1.42); K00031 isocitrate dehydrogenase [EC:1.1.1.42] (A)	[C]	Energy production and conversion	Isocitrate/isopropylmalate dehydrogenase	Isocitrate dehydrogenase [NADP], mitochondrial (Precursor) GN=idhM OS=Dictyostelium discoideum (Slime mold) PE=3 SV=1	Putative uncharacterized protein {ECO:0000313|EMBL:AET50818.1} OS=Eimeria tenella (Coccidian parasite) PE=2 SV=1	hypothetical protein [Eimeria tenella]	Eimeria tenella clone Etm011D02 hypothetical protein mRNA, complete cds
EVM0002914	2909	2.42418	0.0684434	35.4188	8.78534e-275	1.34644e-272	17.0041	17.0513	15.0039	89.587	86.6816	86.7209	[V]	Defense mechanisms	Molecular Function: ATPase activity, coupled to transmembrane movement of substances (GO:0042626);;	K05658|0|tgo:TGME49_039020|ATP-binding cassette protein subfamily B member 2 (EC:3.6.3.30 3.6.3.44); K05658 ATP-binding cassette, subfamily B (MDR/TAP), member 1 [EC:3.6.3.44] (A)	[Q]	Secondary metabolites biosynthesis, transport and catabolism	ABC transporter transmembrane region	ABC transporter B family member 2 GN=abcB2 OS=Dictyostelium discoideum (Slime mold) PE=3 SV=1	ATP-binding cassette protein subfamily B member 2, putative {ECO:0000313|EMBL:CDJ37521.1} OS=Eimeria tenella (Coccidian parasite) PE=3 SV=1	ATP-binding cassette protein subfamily B member 2, putative [Eimeria tenella]	Neospora caninum Liverpool ATP-binding cassette, sub-family B (MDR/TAP),member 4, related (NCLIV_026720) mRNA, complete cds
EVM0004152	1398	2.7628	0.0784746	35.2063	1.6027e-271	2.40813e-269	106.334	118.771	112.797	708.633	790.226	788.942	--	--	--	--	[S]	Function unknown	Uncharacterised protein family (UPF0041)	Mitochondrial pyruvate carrier 1 GN=Mpc1 OS=Drosophila melanogaster (Fruit fly) PE=3 SV=1	Brain protein 44 family protein {ECO:0000313|EMBL:KFG37065.1} OS=Toxoplasma gondii p89 PE=4 SV=1	brain protein 44 family protein [Toxoplasma gondii FOU]	Neospora caninum Liverpool cDNA, FLJ92180, highly similar to Homo sapiens brain protein 44 (BRP44), mRNA, related (NCLIV_050160) mRNA, complete cds
EVM0007357	7863.5	2.15805	0.0615188	35.0796	1.3813e-269	2.03556e-267	227.035	220.944	196.063	928.24	960.654	984.21	--	--	--	--	--	--	--	--	SAG family member {ECO:0000313|EMBL:CDJ37172.1} OS=Eimeria tenella (Coccidian parasite) PE=2 SV=1	hypothetical protein [Eimeria tenella]	Eimeria tenella clone Etm019G05 hypothetical protein mRNA, complete cds
EVM0001686	2142.45	2.7141	0.0775496	34.9982	2.39323e-268	3.46024e-266	53.9729	53.2602	56.0302	327.223	386.77	357.87	--	--	--	--	--	--	Sporozoite TA4 surface antigen	Sporulated oocyst TA4 antigen 8 kDa subunit (Precursor) OS=Eimeria tenella (Coccidian parasite) PE=1 SV=2	SAG family member {ECO:0000313|EMBL:CDJ40608.1} OS=Eimeria tenella (Coccidian parasite) PE=4 SV=1	SAG family member [Eimeria tenella]	Eimeria tenella clone Etm039H03 hypothetical protein mRNA, complete cds
EVM0003757	1806.86	2.67944	0.0767545	34.9092	5.39457e-267	7.65529e-265	18.6132	17.0223	16.1506	103.413	108.746	119.485	--	--	--	--	--	--	--	--	Uncharacterized protein {ECO:0000313|EMBL:CDJ37413.1} OS=Eimeria tenella (Coccidian parasite) PE=2 SV=1	hypothetical protein [Eimeria tenella]	Eimeria tenella clone Etm098E06 hypothetical protein mRNA, complete cds
EVM0004277	1817.26	2.52064	0.0722856	34.8706	2.0731e-266	2.8884e-264	3.58956	3.40696	3.26205	20.4905	19.6974	18.6835	--	--	--	K17570|1.30899e-154|tgo:TGME49_006550|hypothetical protein; K17570 hydrocephalus-inducing protein (A)	--	--	Flagellar-associated PapD-like	--	PREDICTED: similar to hydrocephalus inducing putati, related {ECO:0000313|EMBL:CDJ28141.1} OS=Eimeria mitis PE=4 SV=1	PREDICTED: similar to hydrocephalus inducing putati, related [Eimeria mitis]	--
EVM0002229	2109.32	2.68026	0.0770089	34.8046	2.07406e-265	2.83813e-263	56.62	50.2007	57.0108	323.589	372.247	356.509	--	--	--	--	--	--	Sporozoite TA4 surface antigen	Sporulated oocyst TA4 antigen 8 kDa subunit (Precursor) OS=Eimeria tenella (Coccidian parasite) PE=1 SV=2	SAG family member {ECO:0000313|EMBL:CDJ40610.1} OS=Eimeria tenella (Coccidian parasite) PE=4 SV=1	SAG family member [Eimeria tenella]	Eimeria tenella clone Etm039H03 hypothetical protein mRNA, complete cds
EVM0005951	10153.6	-1.97206	0.0573194	-34.4047	2.14457e-259	2.88313e-257	113.768	112.784	115.306	30.5383	28.8938	27.7377	[RTKL]	--	Molecular Function: transferase activity, transferring phosphorus-containing groups (GO:0016772);;	--	[T]	Signal transduction mechanisms	Protein kinase domain	Serine/threonine-protein kinase DDB_G0283821 GN=DDB_G0283821 OS=Dictyostelium discoideum (Slime mold) PE=3 SV=1	Uncharacterized protein {ECO:0000313|EMBL:CDJ37634.1} OS=Eimeria tenella (Coccidian parasite) PE=3 SV=1	hypothetical protein, conserved [Eimeria tenella]	--
EVM0006693	147446	1.60082	0.0465447	34.3931	3.19314e-259	4.2188e-257	4434.88	4207.93	4342.54	12979.5	12802.5	13605.3	--	--	--	--	--	--	Microneme protein Etmic-2	--	Microneme protein-2 {ECO:0000313|EMBL:AGU91710.1} OS=Eimeria tenella (Coccidian parasite) PE=2 SV=1	microneme protein-2 [Eimeria tenella]	Eimeria tenella microneme protein-2 (MIC2) mRNA, complete cds
EVM0006397	13835	-1.70693	0.0499628	-34.164	8.29317e-256	1.07713e-253	145.306	146.767	145.67	45.642	43.5726	44.8785	[KL]	--	Molecular Function: hydrolase activity (GO:0016787);; Molecular Function: ion binding (GO:0043167);; Molecular Function: organic cyclic compound binding (GO:0097159);; Molecular Function: heterocyclic compound binding (GO:1901363);;	--	[K]	Transcription	SNF2 family N-terminal domain	Chromodomain-helicase-DNA-binding protein 1 GN=Chd1 OS=Drosophila melanogaster (Fruit fly) PE=1 SV=1	SNF2 family N-terminal domain containing protein, putative {ECO:0000313|EMBL:CDJ36991.1} OS=Eimeria tenella (Coccidian parasite) PE=4 SV=1	SNF2 family N-terminal domain containing protein, putative [Eimeria tenella]	Neospora caninum Liverpool putative SNF2 family N-terminal domain containing protein (NCLIV_050870) mRNA, complete cds
EVM0002413	14453.7	1.63758	0.0480079	34.1106	5.1421e-255	6.56732e-253	209.518	212.974	214.426	665.867	649.267	666.575	--	--	--	--	--	--	--	--	Uncharacterized protein {ECO:0000313|EMBL:CDJ43050.1} OS=Eimeria tenella (Coccidian parasite) PE=4 SV=1	hypothetical protein, conserved [Eimeria tenella]	Eimeria tenella clone Etm002A06 hypothetical protein mRNA, complete cds
EVM0005577	13770.6	1.73284	0.0509493	34.011	1.53111e-253	1.92342e-251	319.832	293.364	296.25	1041.49	971.569	1010.44	[RTKL]	--	Molecular Function: protein serine/threonine kinase activity (GO:0004674);; Biological Process: cellular process (GO:0009987);; Molecular Function: ion binding (GO:0043167);;	K13412|2.56503e-130|pfd:PFDG_01404|calcium-dependent protein kinase 4; K13412 calcium-dependent protein kinase [EC:2.7.11.1] (A)	[T]	Signal transduction mechanisms	EF hand	Calcium-dependent protein kinase 4 GN=CPK4 OS=Plasmodium falciparum (isolate 3D7) PE=1 SV=3	CAM kinase, CDPK family TgCDPK1, putative {ECO:0000313|EMBL:CDJ64310.1} OS=Eimeria necatrix PE=4 SV=1	CAM kinase, CDPK family TgCDPK1, putative [Eimeria necatrix]	Eimeria tenella calmodulin-like domain protein kinase mRNA, complete cds
EVM0006636	11098.9	1.82646	0.0539452	33.8577	2.79114e-251	3.44976e-249	425.451	451.413	409.104	1490.73	1538.04	1529.86	--	--	--	--	--	--	--	--	Uncharacterized protein {ECO:0000313|EMBL:CDJ40989.1} OS=Eimeria tenella (Coccidian parasite) PE=4 SV=1	hypothetical protein, conserved [Eimeria tenella]	Neospora caninum Liverpool conserved hypothetical protein (NCLIV_027160) mRNA, complete cds
EVM0003812	2239.78	2.65164	0.0791298	33.51	3.44324e-246	4.18818e-244	23.304	26.5661	26.8472	164.729	163.5	153.554	--	--	--	K13845|4.23408e-118|tgo:TGME49_100130|apical membrane antigen, putative; K13845 apical merozoite antigen 1 (A)	--	--	Apical membrane antigen 1	Apical membrane antigen 1, soluble form (Precursor) GN=AMA1 OS=Toxoplasma gondii PE=1 SV=1	Apical membrane antigen, putative {ECO:0000313|EMBL:CDJ36979.1} OS=Eimeria tenella (Coccidian parasite) PE=4 SV=1	apical membrane antigen, putative [Eimeria tenella]	Eimeria tenella invasion-associated protein MA1 (ma-1) mRNA, complete cds
EVM0005147	6827.63	1.85303	0.0556306	33.3096	2.80513e-243	3.3587e-241	560.476	591.442	615.649	2130.69	2047.68	2207.21	--	--	--	--	[T]	Signal transduction mechanisms	MORN repeat	--	Uncharacterized protein {ECO:0000313|EMBL:CDJ45314.1} OS=Eimeria tenella (Coccidian parasite) PE=4 SV=1	hypothetical protein, conserved [Eimeria tenella]	--
EVM0003021	11312.2	1.60358	0.0481726	33.2883	5.70635e-243	6.72734e-241	422.147	404.03	408.785	1276.21	1238.5	1239.04	[T]	Signal transduction mechanisms	Molecular Function: protein domain specific binding (GO:0019904);;	K06630|9.34904e-154|tgo:TGME49_063090|14-3-3 protein, putative; K06630 14-3-3 protein epsilon (A)	[O]	Posttranslational modification, protein turnover, chaperones	14-3-3 protein	14-3-3 protein OS=Eimeria tenella (Coccidian parasite) PE=2 SV=1	14-3-3 protein {ECO:0000313|EMBL:CDJ38777.1} OS=Eimeria tenella (Coccidian parasite) PE=3 SV=1	RecName: Full=14-3-3 protein [Eimeria tenella]	Eimeria tenella 14-3-3 protein mRNA, complete cds
EVM0008120	5696.16	1.8777	0.0564507	33.2626	1.34018e-242	1.55603e-240	180.731	166.308	164.295	604.23	632.273	642.862	--	--	--	--	--	--	Janus/Ocnus family (Ocnus)	--	14 kDa phosphohistidine phosphatase, putative {ECO:0000313|EMBL:CDJ40270.1} OS=Eimeria tenella (Coccidian parasite) PE=4 SV=1	14 kDa phosphohistidine phosphatase, putative [Eimeria tenella]	--
EVM0004628	8235.12	1.66927	0.0504622	33.0796	5.83132e-240	6.66947e-238	195.301	189.356	200.99	625.215	602.451	635.67	--	--	Cellular Component: ubiquitin ligase complex (GO:0000151);; Biological Process: ubiquitin-dependent protein catabolic process (GO:0006511);;	K08770|5.92444e-161|tgo:TGME49_019820|polyubiquitin, putative; K08770 ubiquitin C (A)	[OR]	--	Ubiquitin family	Ubiquitin (Precursor) GN=TU20 OS=Tetrahymena pyriformis PE=3 SV=1	Polyubiquitin {ECO:0000313|EMBL:AFV28812.1} (Fragment) OS=Pseudokeronopsis flava PE=4 SV=1	polyubiquitin, partial [Pseudokeronopsis flava]	Eimeria tenella clone Etm005E08 hypothetical protein mRNA, complete cds
EVM0007481	3285.14	2.24933	0.0681976	32.9825	1.44884e-238	1.63272e-236	26.0789	26.2552	27.3223	129.875	125.655	123.346	--	--	--	--	--	--	--	--	Transmembrane domain-containing protein, putative {ECO:0000313|EMBL:CDJ37864.1} OS=Eimeria tenella (Coccidian parasite) PE=4 SV=1	transmembrane domain-containing protein, putative [Eimeria tenella]	Eimeria maxima imp-1 gene for immune mapped protein 1, exons 1-4, strain Weybridge, clone EmaxBAC2k08
EVM0004699	33531.9	1.67385	0.0511319	32.7359	4.81256e-235	5.34473e-233	1136.44	1110.06	1085.99	3346.65	3667.23	3618.58	--	--	--	--	--	--	--	--	Uncharacterized protein {ECO:0000313|EMBL:CDJ41484.1} OS=Eimeria tenella (Coccidian parasite) PE=4 SV=1	hypothetical protein, conserved [Eimeria tenella]	--
EVM0001801	7478.03	1.73718	0.0537214	32.3368	2.12715e-229	2.32862e-227	66.952	67.4349	71.7891	225.629	221.49	240.395	[E]	Amino acid transport and metabolism	--	K01255|1.12673e-154|tgo:TGME49_090670|cytosol aminopeptidase (EC:3.4.11.1); K01255 leucyl aminopeptidase [EC:3.4.11.1] (A)	[R]	General function prediction only	Cytosol aminopeptidase family, catalytic domain	Cytosol aminopeptidase GN=lap OS=Dictyostelium discoideum (Slime mold) PE=1 SV=1	Cytosol aminopeptidase, putative {ECO:0000313|EMBL:CDJ40179.1} OS=Eimeria tenella (Coccidian parasite) PE=3 SV=1	cytosol aminopeptidase, putative [Eimeria tenella]	Eimeria tenella putative leucine aminopeptidase mRNA, partial cds
EVM0005810	581.363	3.63104	0.112964	32.1433	1.0947e-226	1.1815e-224	14.0769	16.1343	16.9917	187.2	190.92	206.266	--	--	--	--	--	--	--	--	Uncharacterized protein {ECO:0000313|EMBL:CDJ37349.1} OS=Eimeria tenella (Coccidian parasite) PE=4 SV=1	hypothetical protein, conserved [Eimeria tenella]	--
EVM0006436	2060.23	2.20783	0.0689468	32.0221	5.36515e-225	5.71016e-223	17.9863	19.5179	21.1515	92.8089	88.2188	90.1166	--	--	--	--	--	--	Uncharacterized ACR, COG1678	--	Uncharacterized protein {ECO:0000313|EMBL:CDJ43236.1} OS=Eimeria tenella (Coccidian parasite) PE=4 SV=1	hypothetical protein, conserved [Eimeria tenella]	PREDICTED: Harpegnathos saltator uncharacterized LOC105188601 (LOC105188601), mRNA
EVM0008052	9258.82	1.75672	0.0558698	31.4431	5.22033e-217	5.47991e-215	84.3098	82.4631	83.992	279.576	273.997	293.895	--	--	--	--	--	--	--	--	Uncharacterized protein {ECO:0000313|EMBL:CDJ37282.1} OS=Eimeria tenella (Coccidian parasite) PE=4 SV=1	hypothetical protein, conserved [Eimeria tenella]	Eimeria praecox RAPD-SCAR marker Pr-E15-773 genomic sequence
EVM0005145	1420.72	2.88278	0.0917882	31.4069	1.62898e-216	1.68688e-214	22.7047	18.0483	21.4644	148.781	148.88	162.89	--	--	Molecular Function: metallocarboxypeptidase activity (GO:0004181);; Biological Process: proteolysis (GO:0006508);; Molecular Function: zinc ion binding (GO:0008270);;	--	[S]	Function unknown	Zinc carboxypeptidase	--	Uncharacterized protein {ECO:0000313|EMBL:CDJ37607.1} OS=Eimeria tenella (Coccidian parasite) PE=2 SV=1	hypothetical protein [Eimeria tenella]	Eimeria tenella clone Etm097F03 hypothetical protein mRNA, complete cds
EVM0003001	1136.88	2.82191	0.0902128	31.2806	8.56182e-215	8.7479e-213	29.9714	27.2856	27.5586	193.76	202.337	204.164	--	--	--	--	--	--	Sporozoite TA4 surface antigen	Sporulated oocyst TA4 antigen 8 kDa subunit (Precursor) OS=Eimeria tenella (Coccidian parasite) PE=1 SV=2	Surface antigen 10 {ECO:0000313|EMBL:CAE52313.1} (Precursor) OS=Eimeria tenella (Coccidian parasite) PE=2 SV=1	surface antigen 10 [Eimeria tenella]	Eimeria tenella mRNA for surface antigen 10 (sag10 gene)
[truncated: 2,053 more rows]

## Sheet: T4_VS_T1
Supplementary Dataset 5: Differentially expressed genes between 1 and 4 h of toltrazuril treatment (T4 vs. T1).
	baseMean	log2FoldChange	lfcSE	stat	pvalue	padj	T1-1	T1-2	T1-3	T4-1	T4-2	T4-3	COG_class	COG_class_annotation	GO_annotation	KEGG_annotation	KOG_class	KOG_class_annotation	Pfam_annotation	Swissprot_annotation	TrEMBL_annotation	nr_annotation	nt_annotation
[truncated: 1,418 more rows]

## Sheet: T4_VS_T0
Supplementary Dataset 6: DEG analysis after 4h of toltrazuril treatment and untreatment.
[truncated: 1,392 more rows]

[truncated: 3 more sheets: GO_enrichment_T2_vs_T1_down, GO_enrichment_T4_vs_T2_up, GO_enrichment_T4_vs_T0_up]
